# Supplementary material for: Differential Gene Expression at the Maternal-Fetal Interface in Preeclampsia Is Influenced by Gestational Age
Source: PubMed Central journal article supplement (PMC3729459; doi:10.1371/journal.pone.0069848), 2013-07-31

# 212765\_at

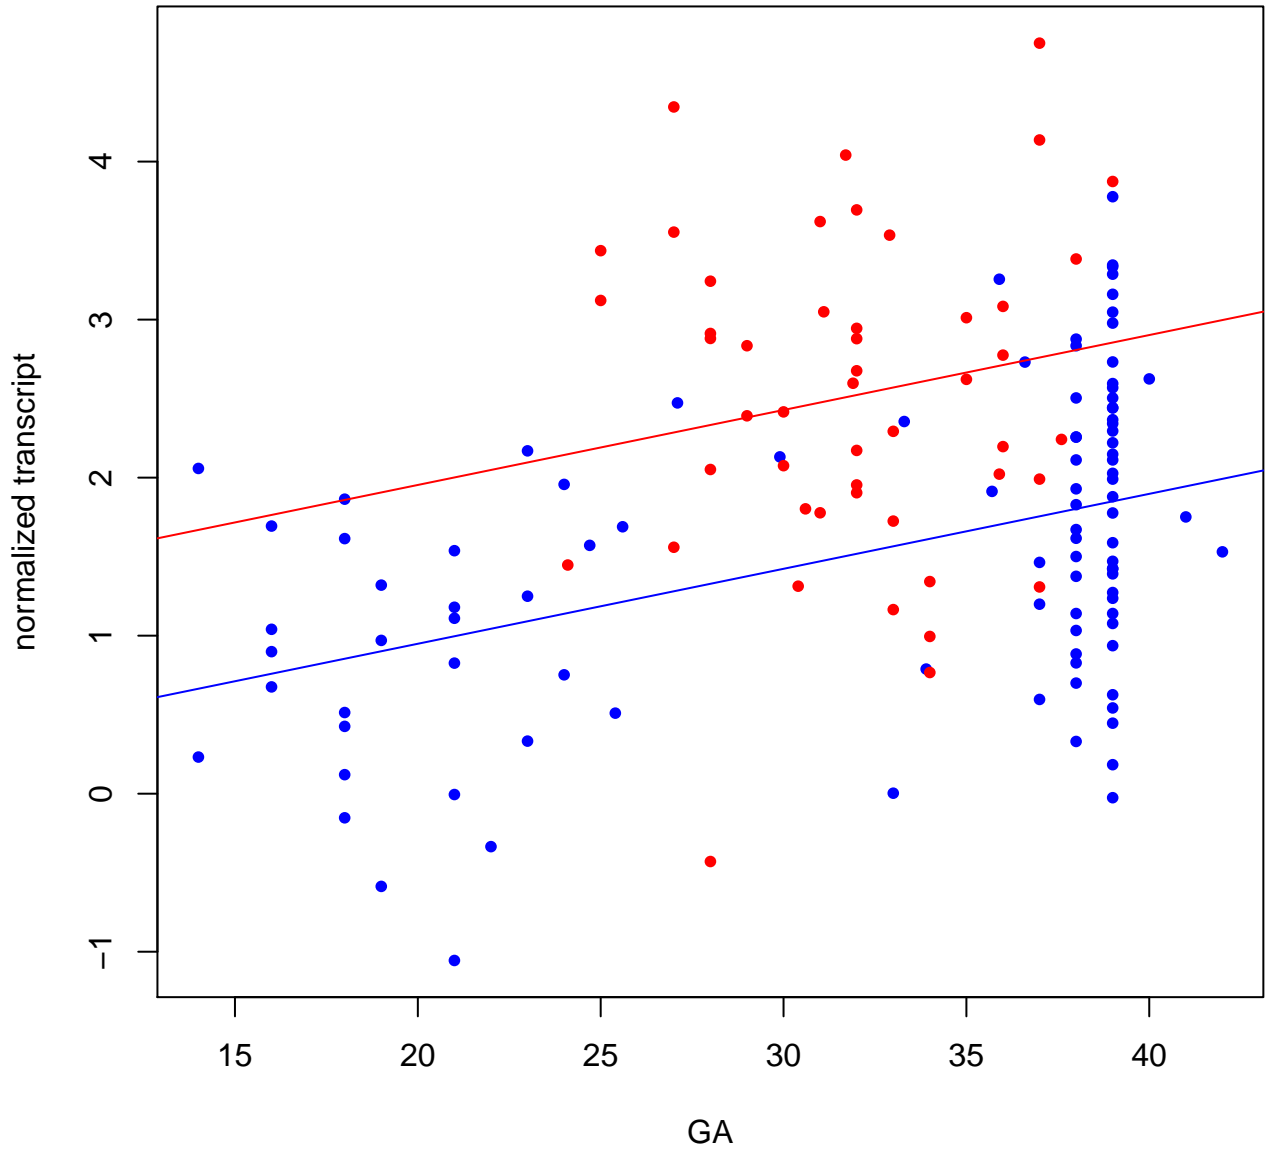

# 212763\_at

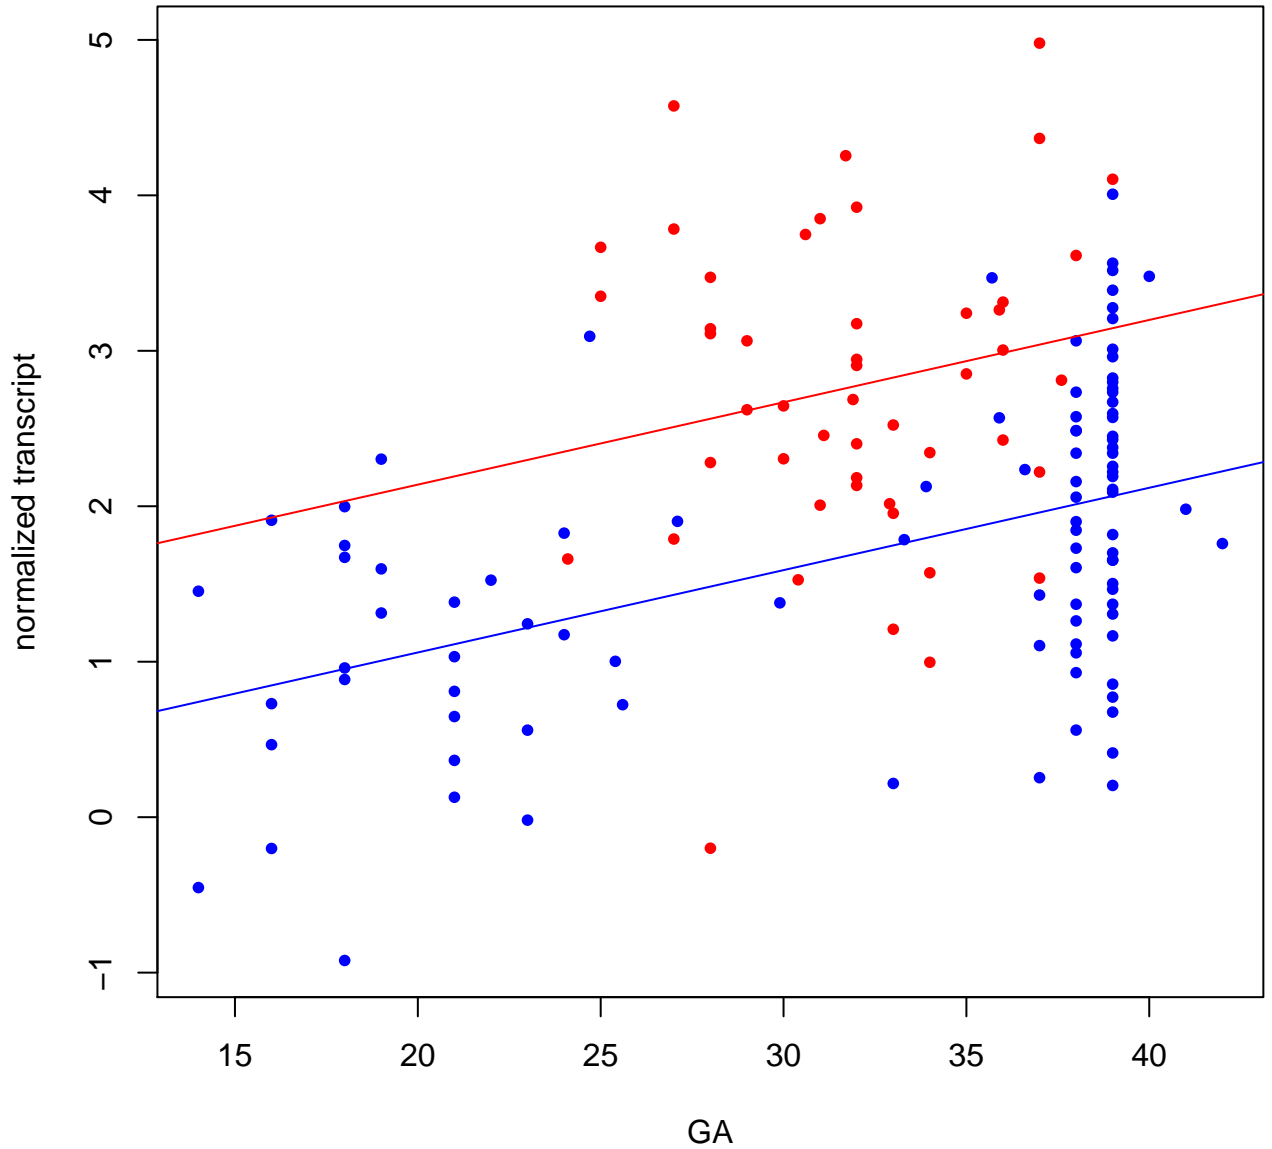

# 209955\_s\_at

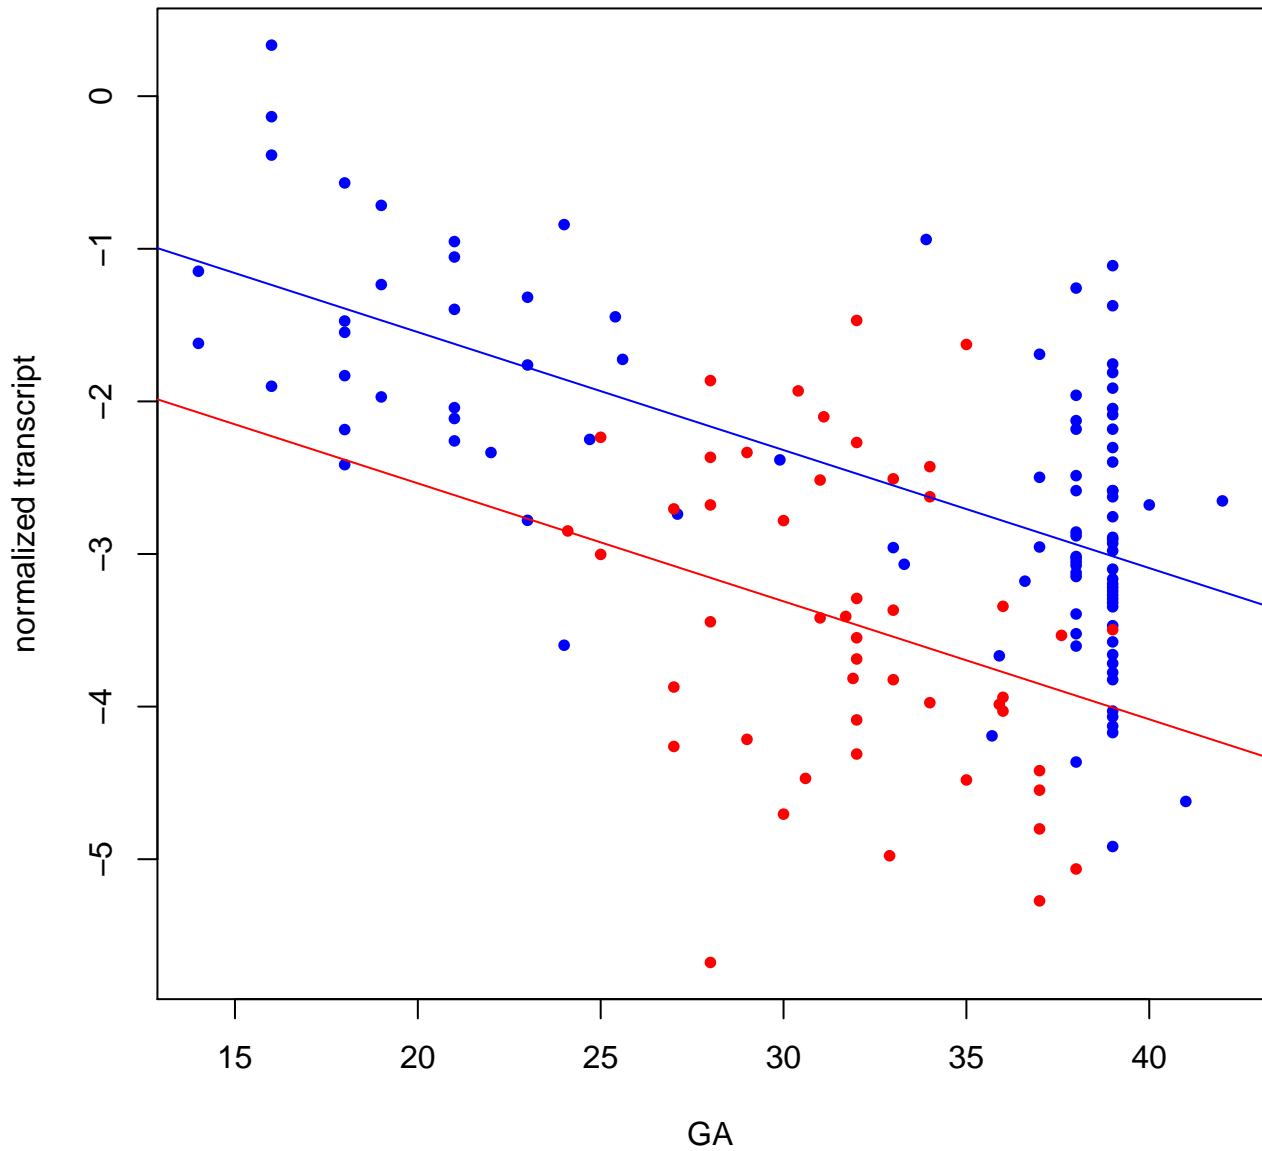

# 209496\_at

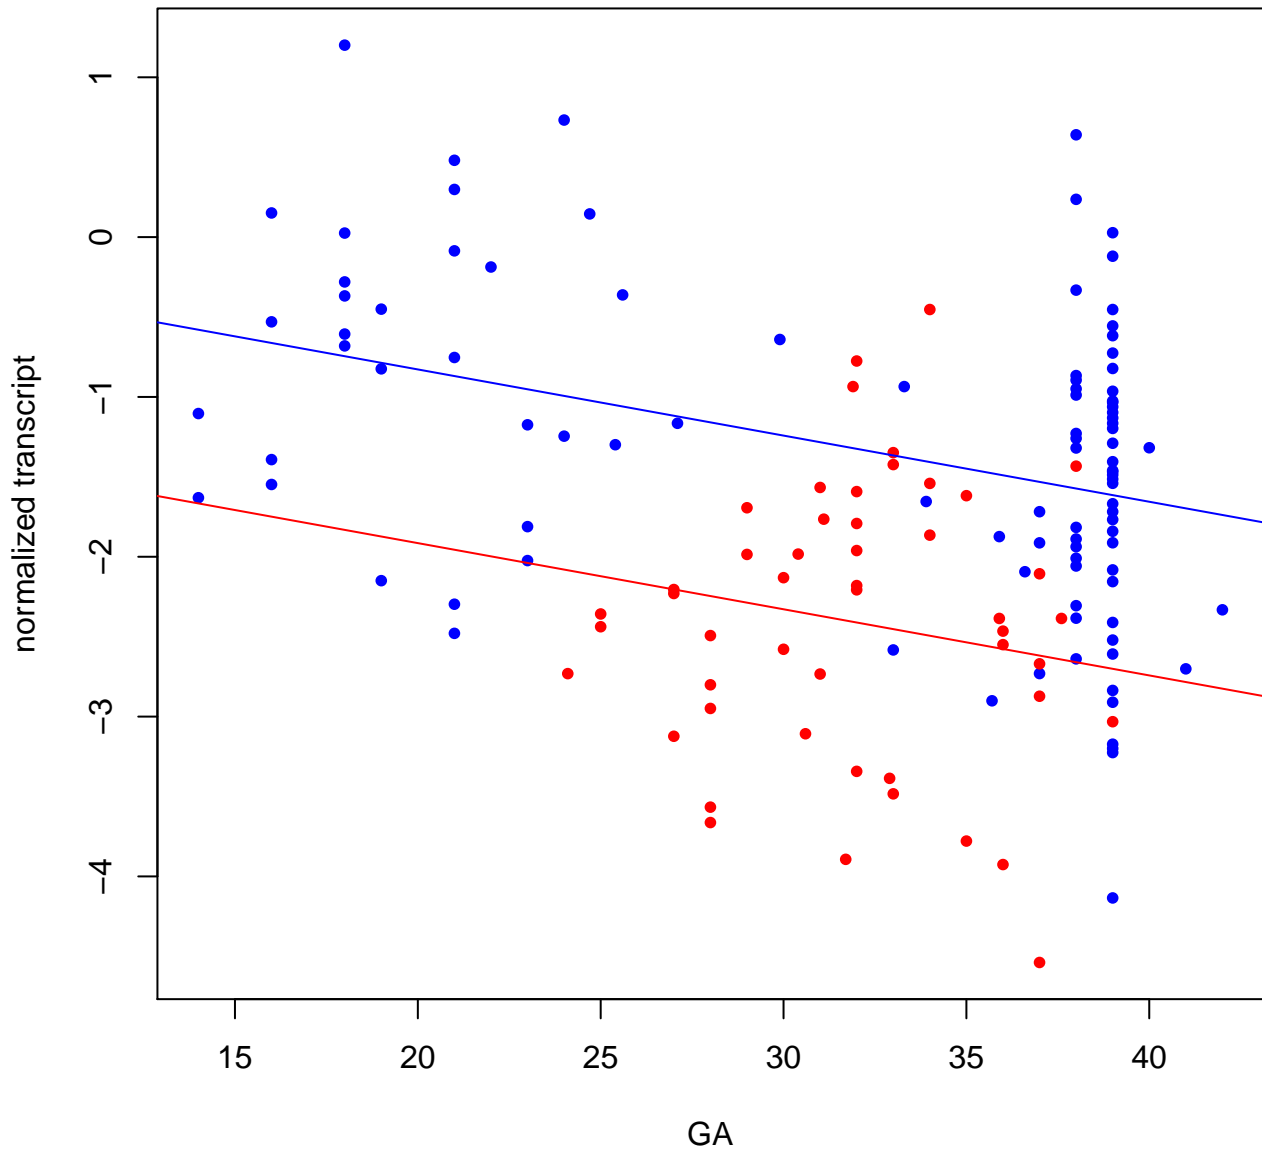

# 201197\_at.1

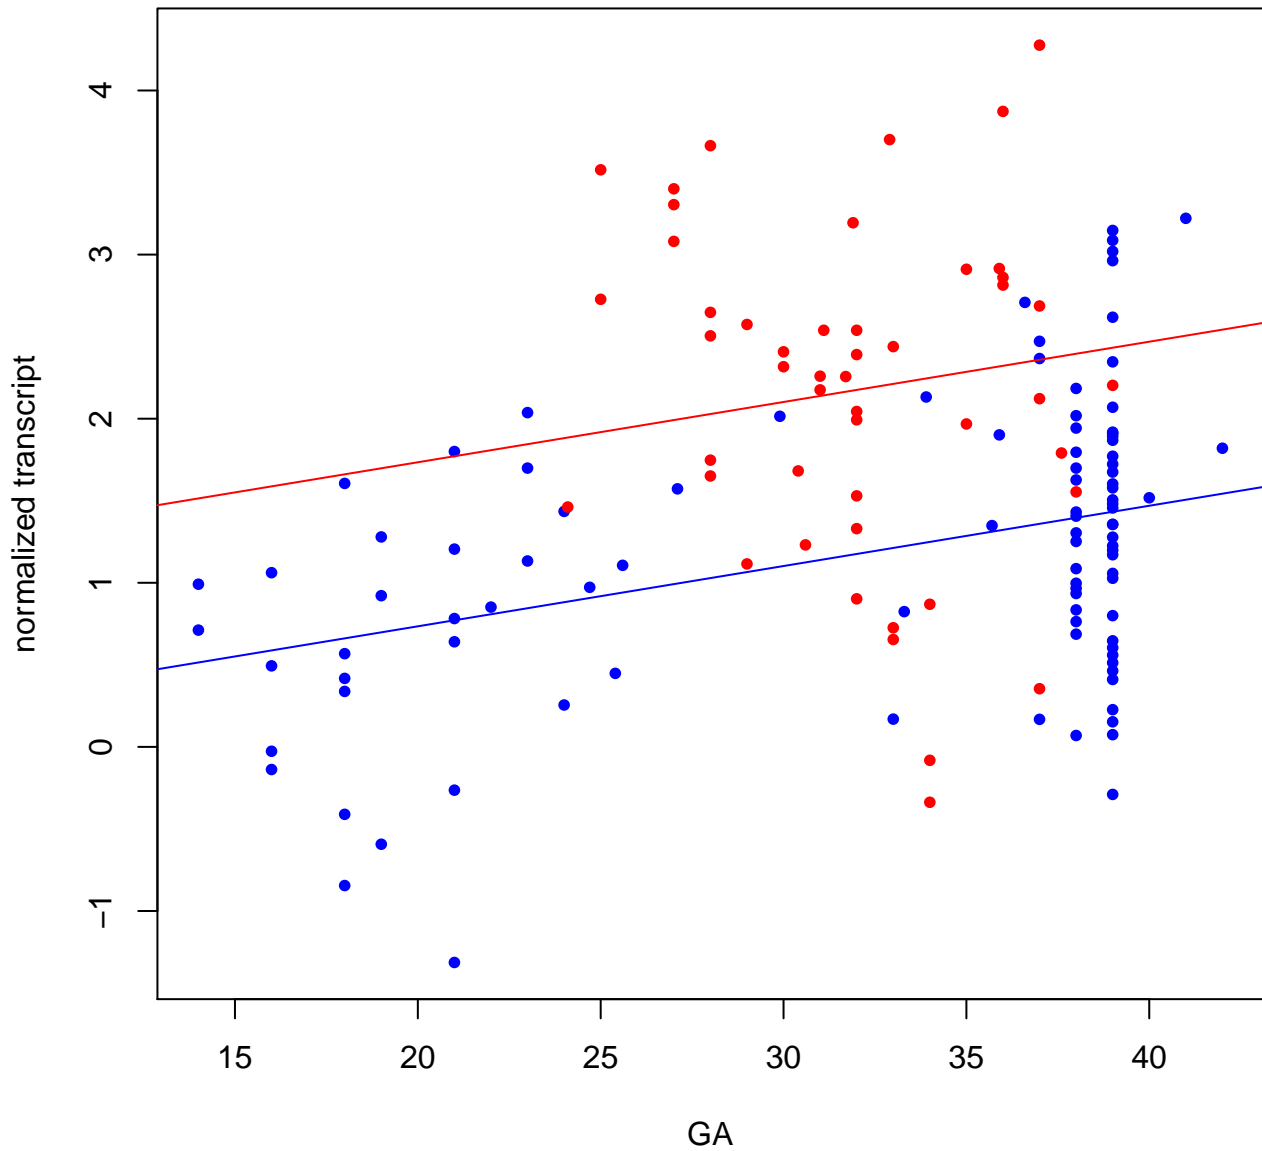

# 201196\_s\_at.1

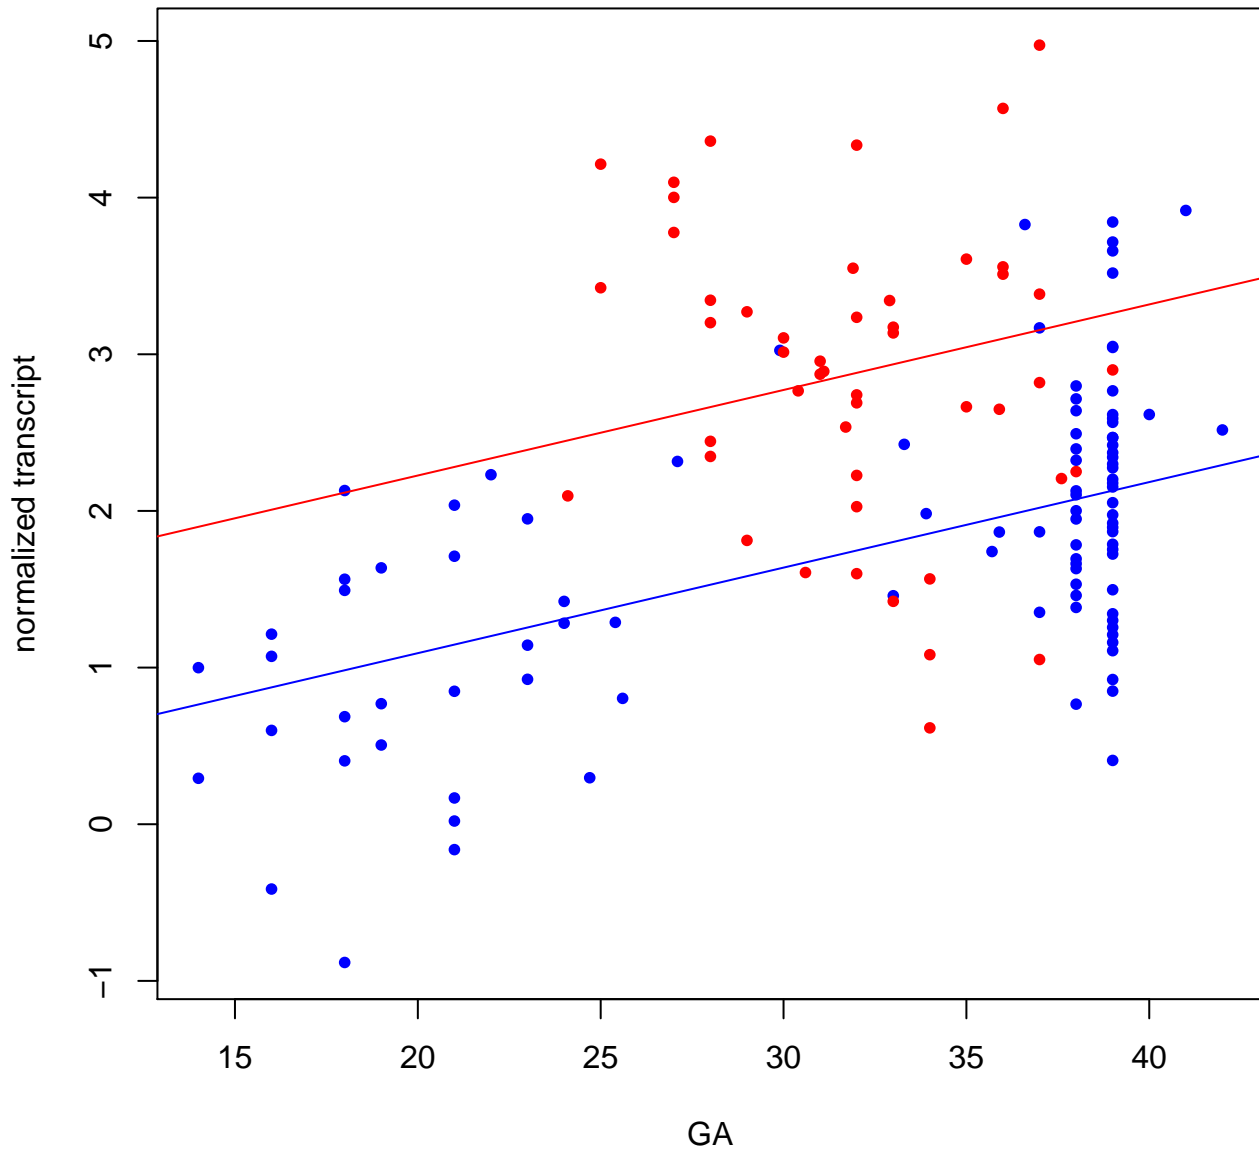

# 213001\_at

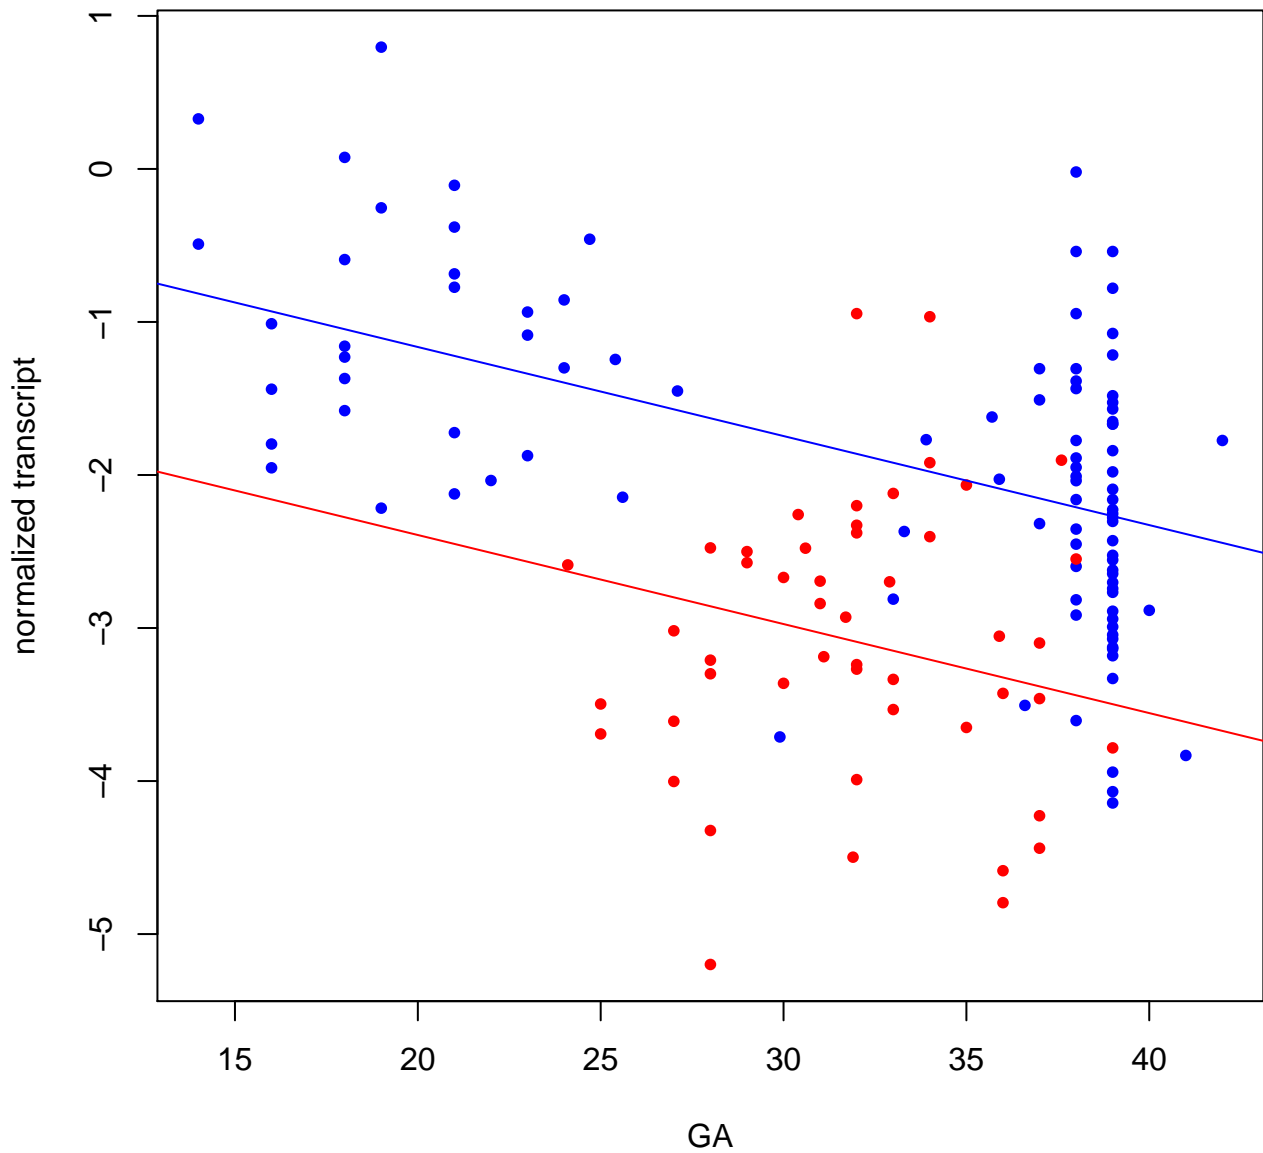









# 204955\_at

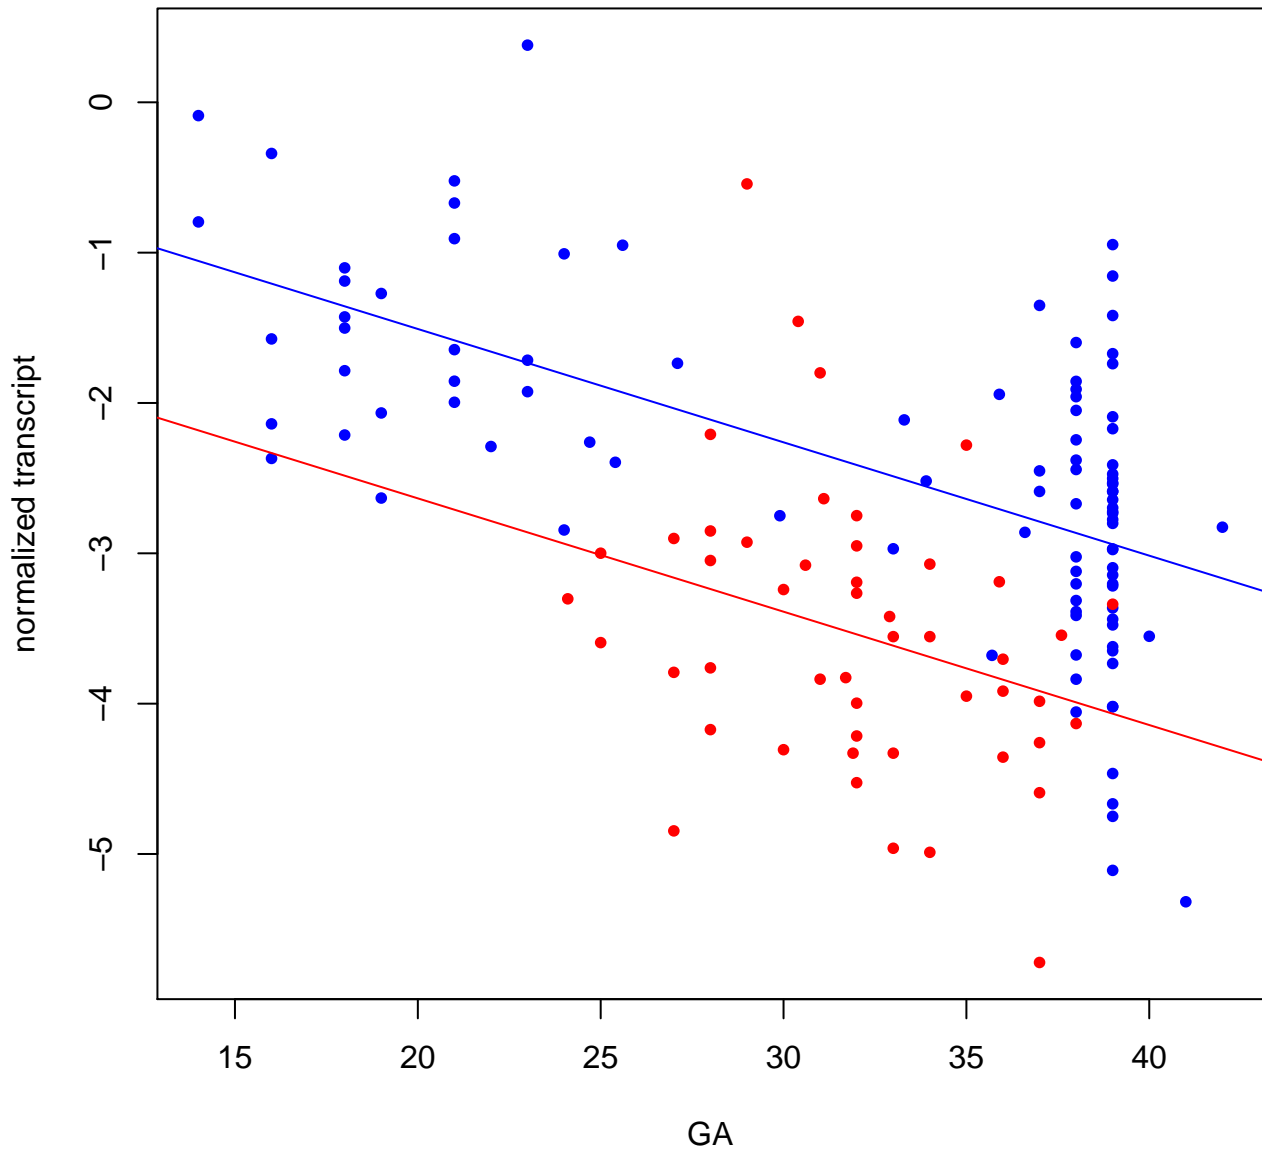



# 207279\_s\_at

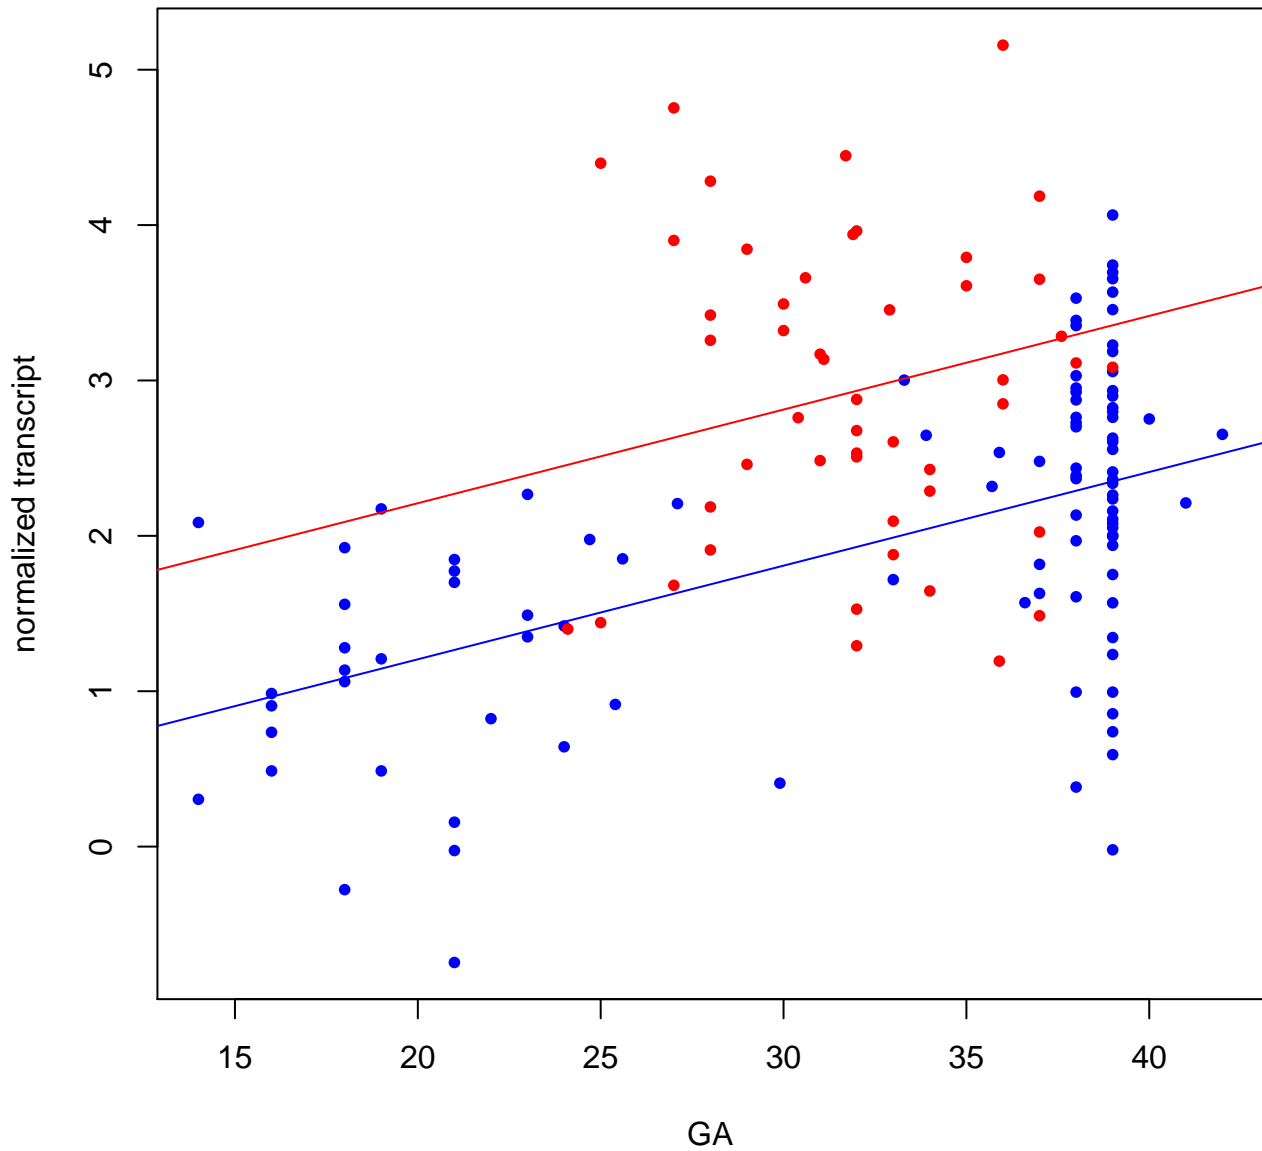

# 219869\_s\_at

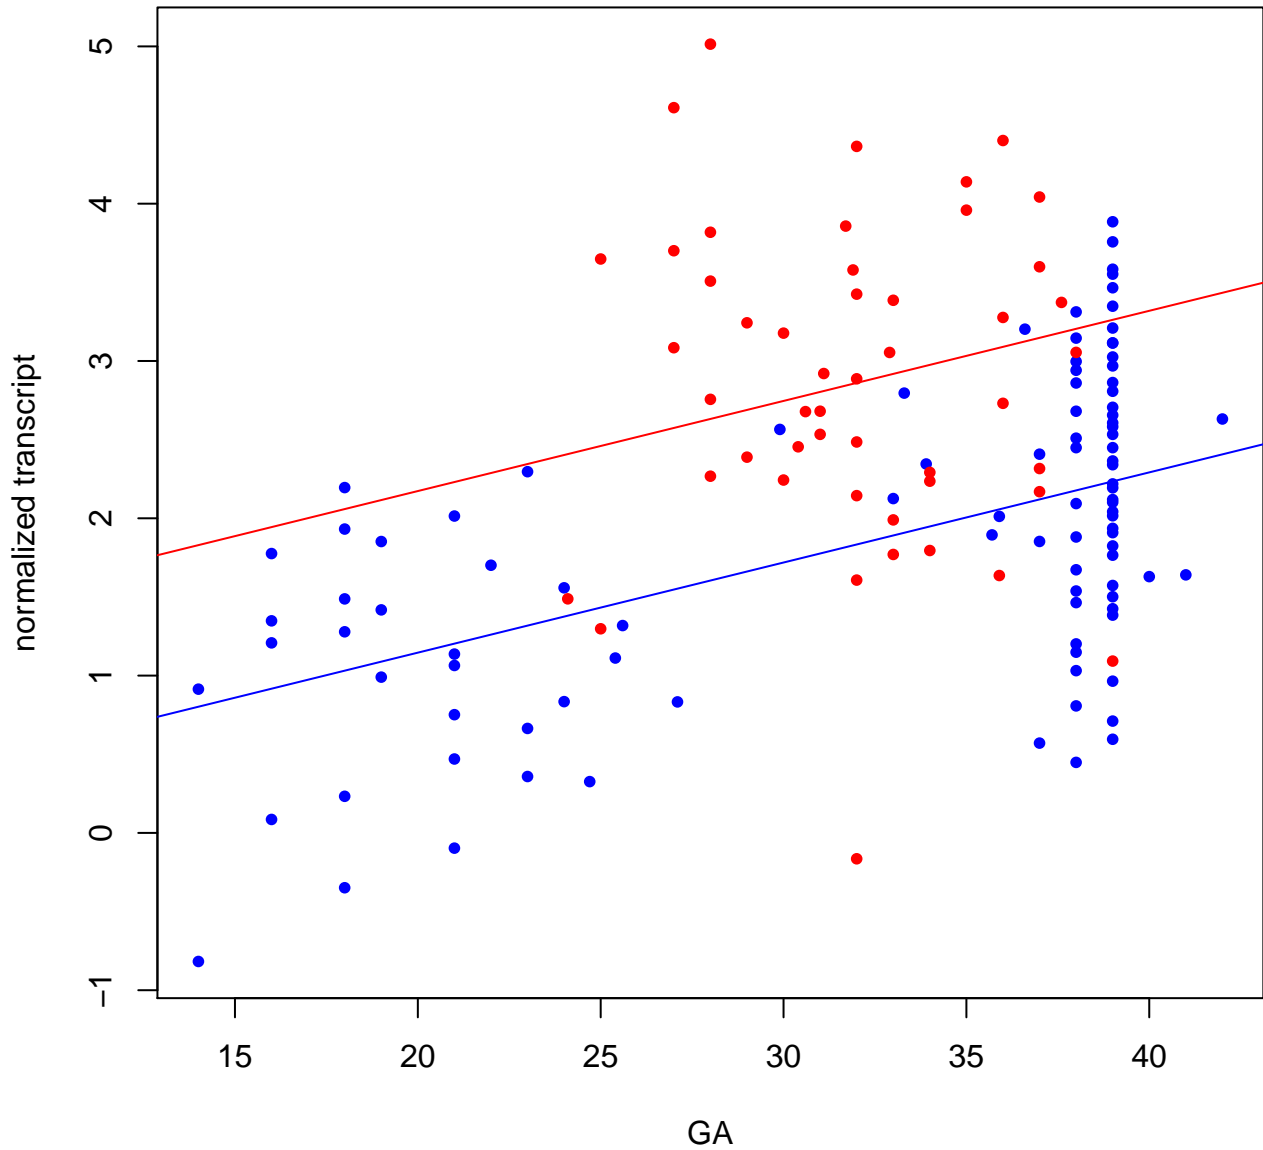

# 201462\_at

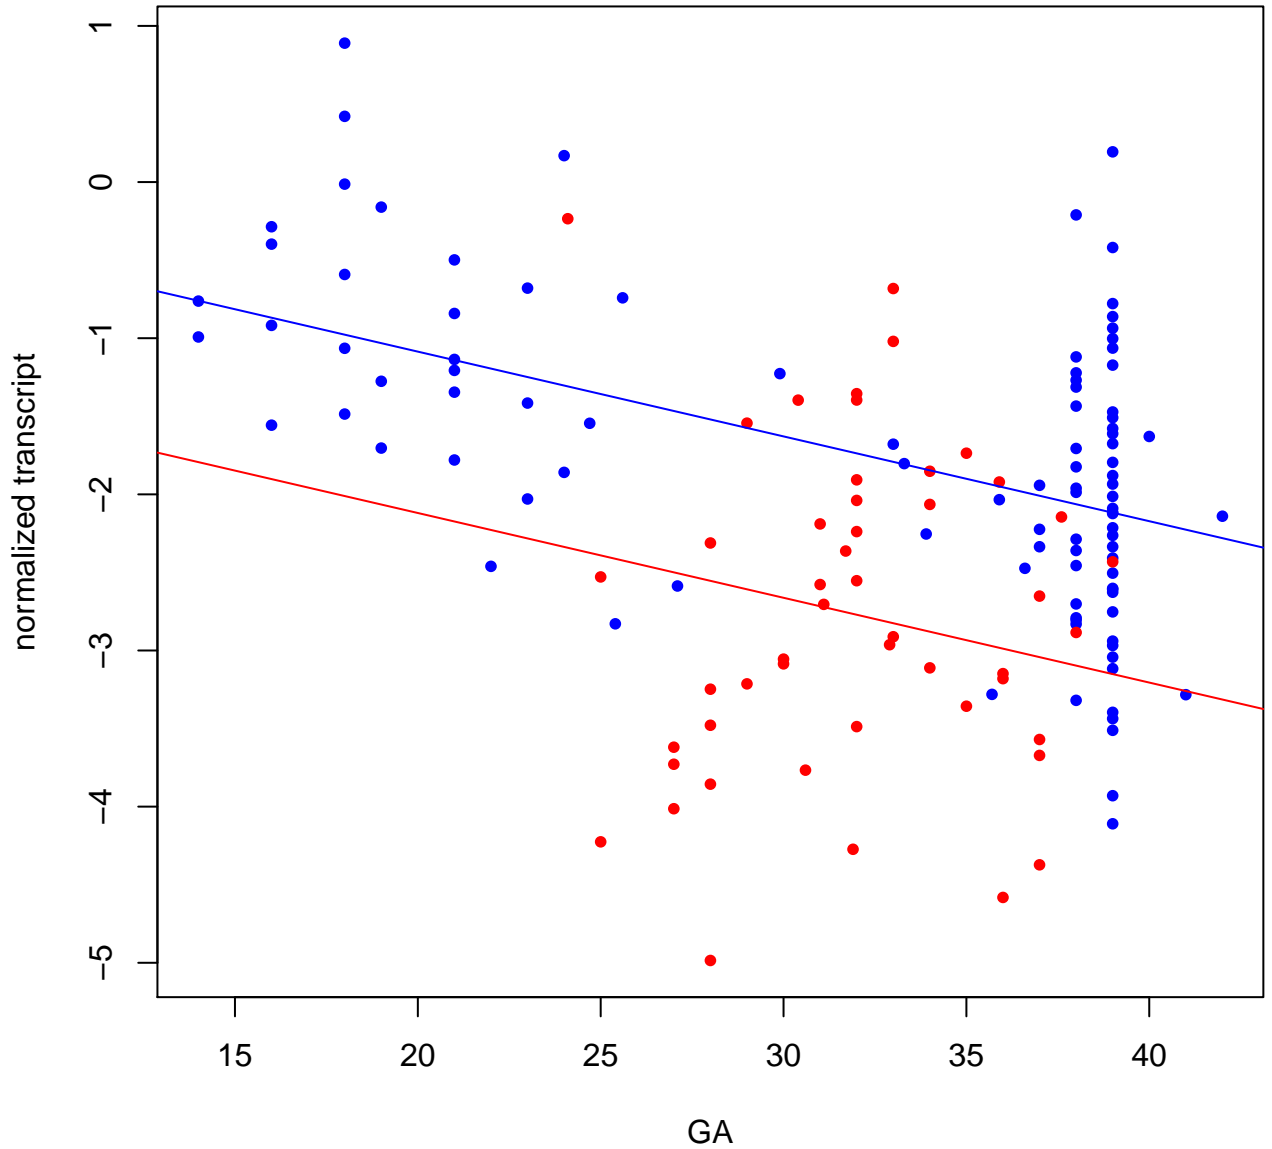

# 221879\_at.1

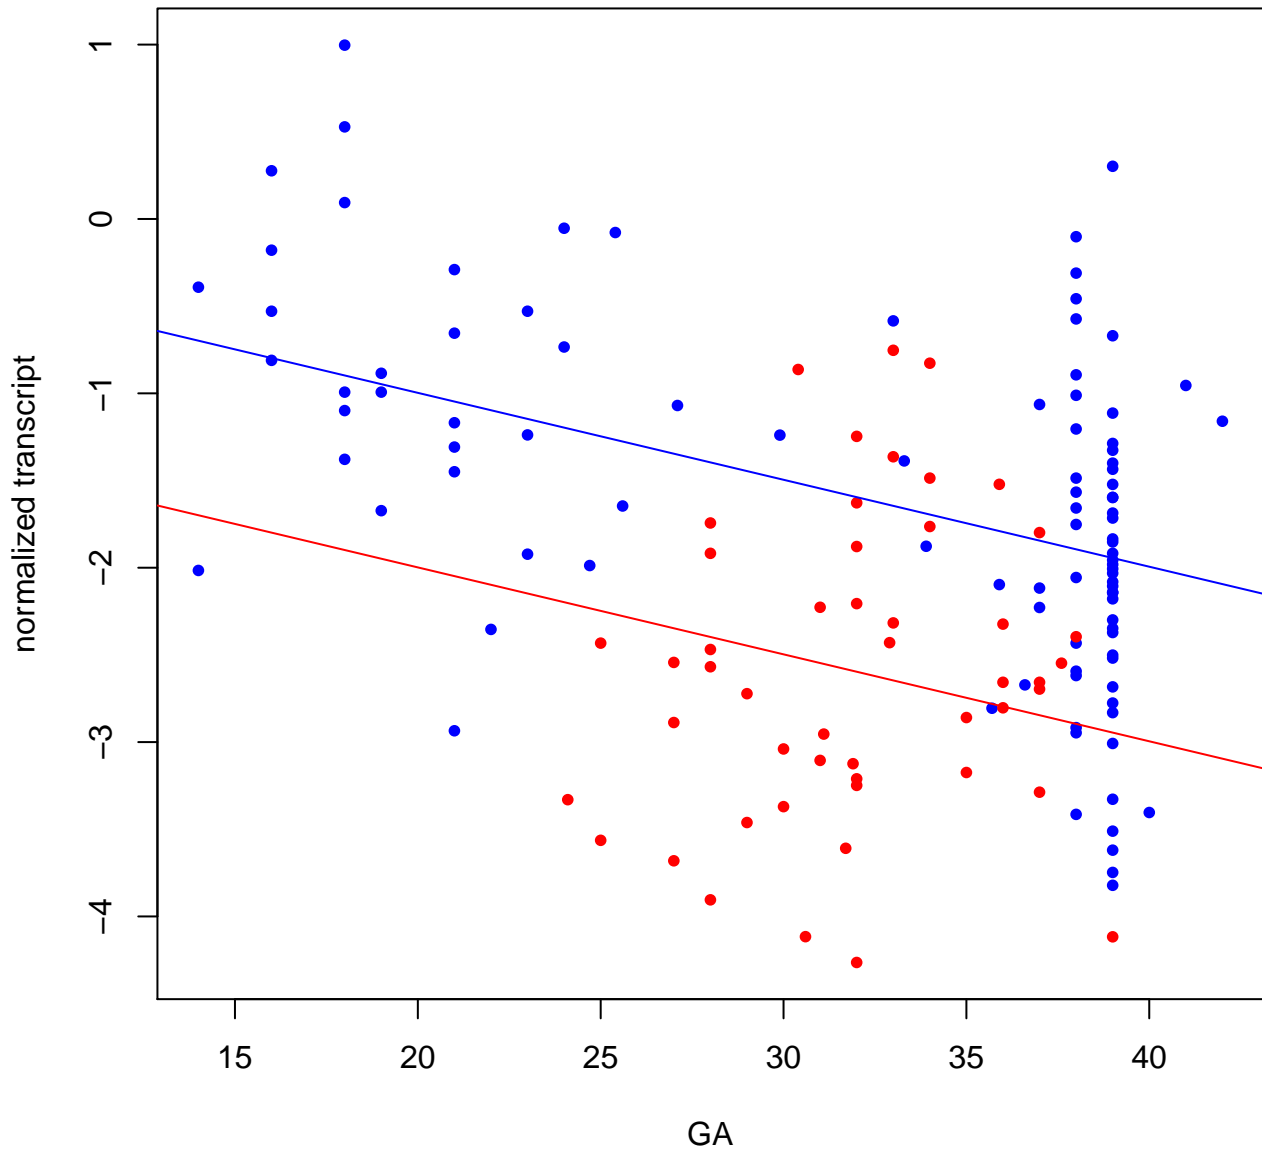







# 212325\_at

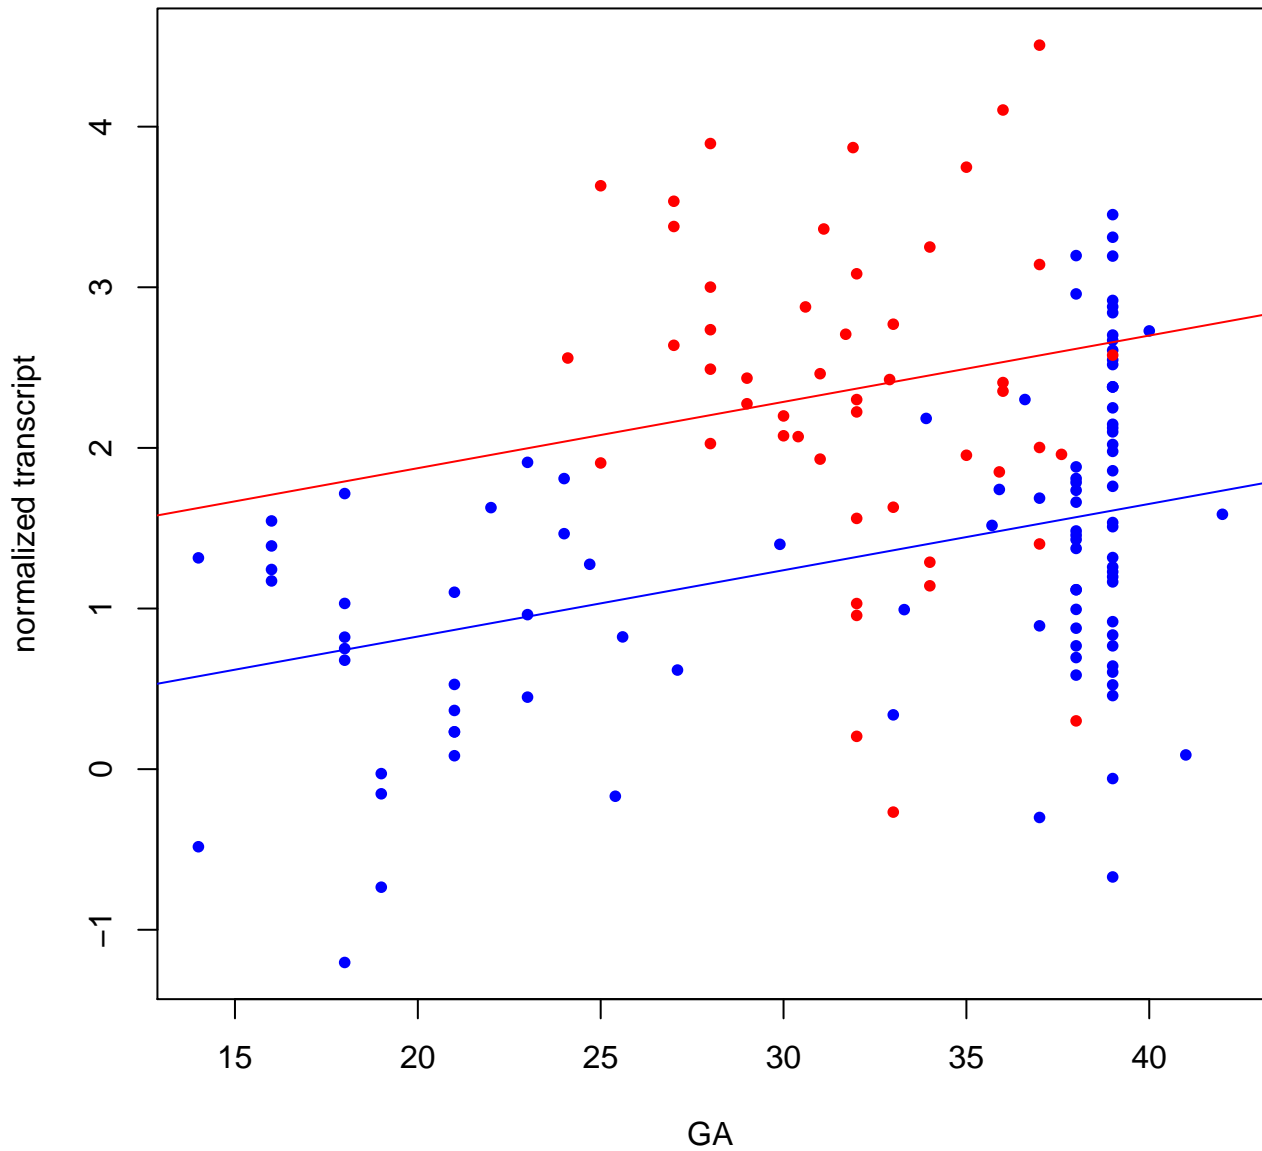

# 212328\_at

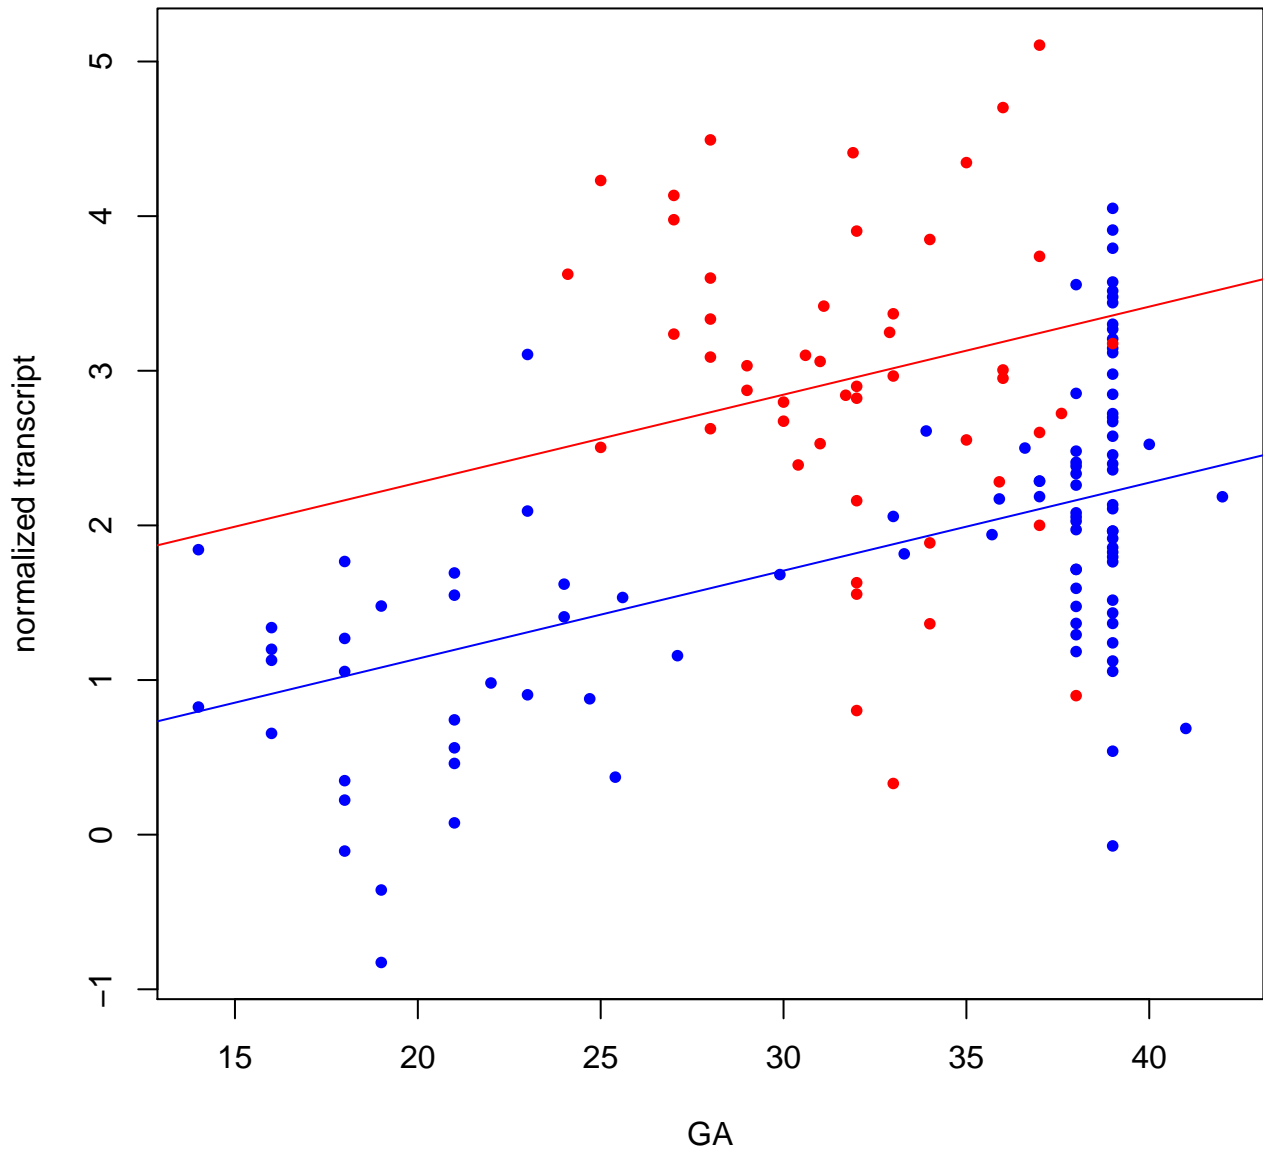

# 212327\_at

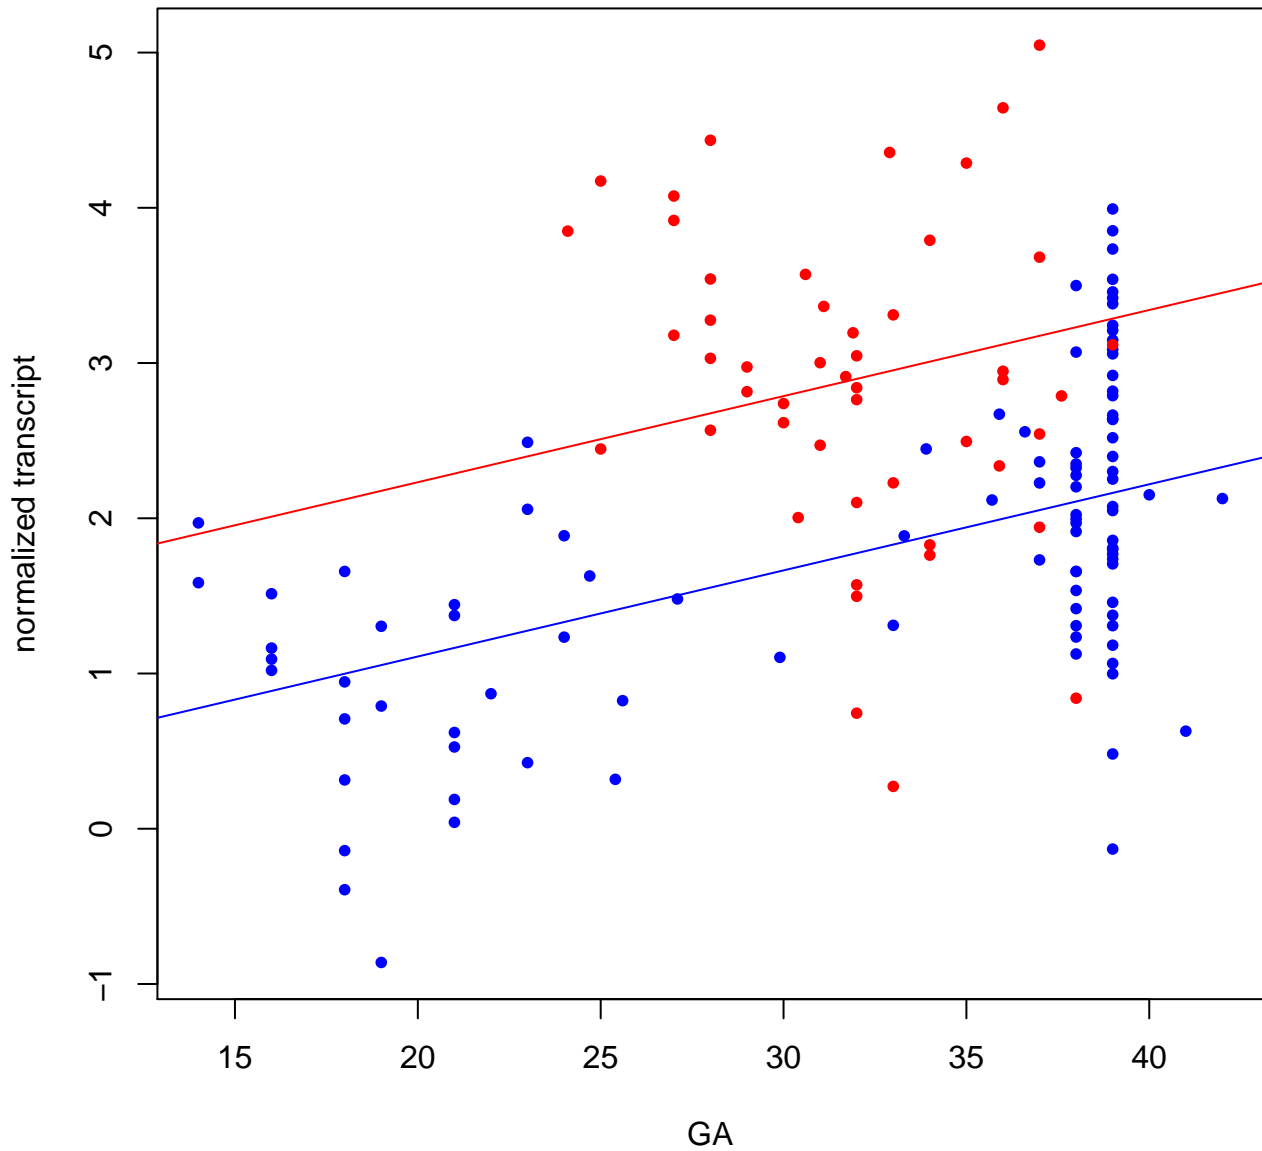

# 202283\_at

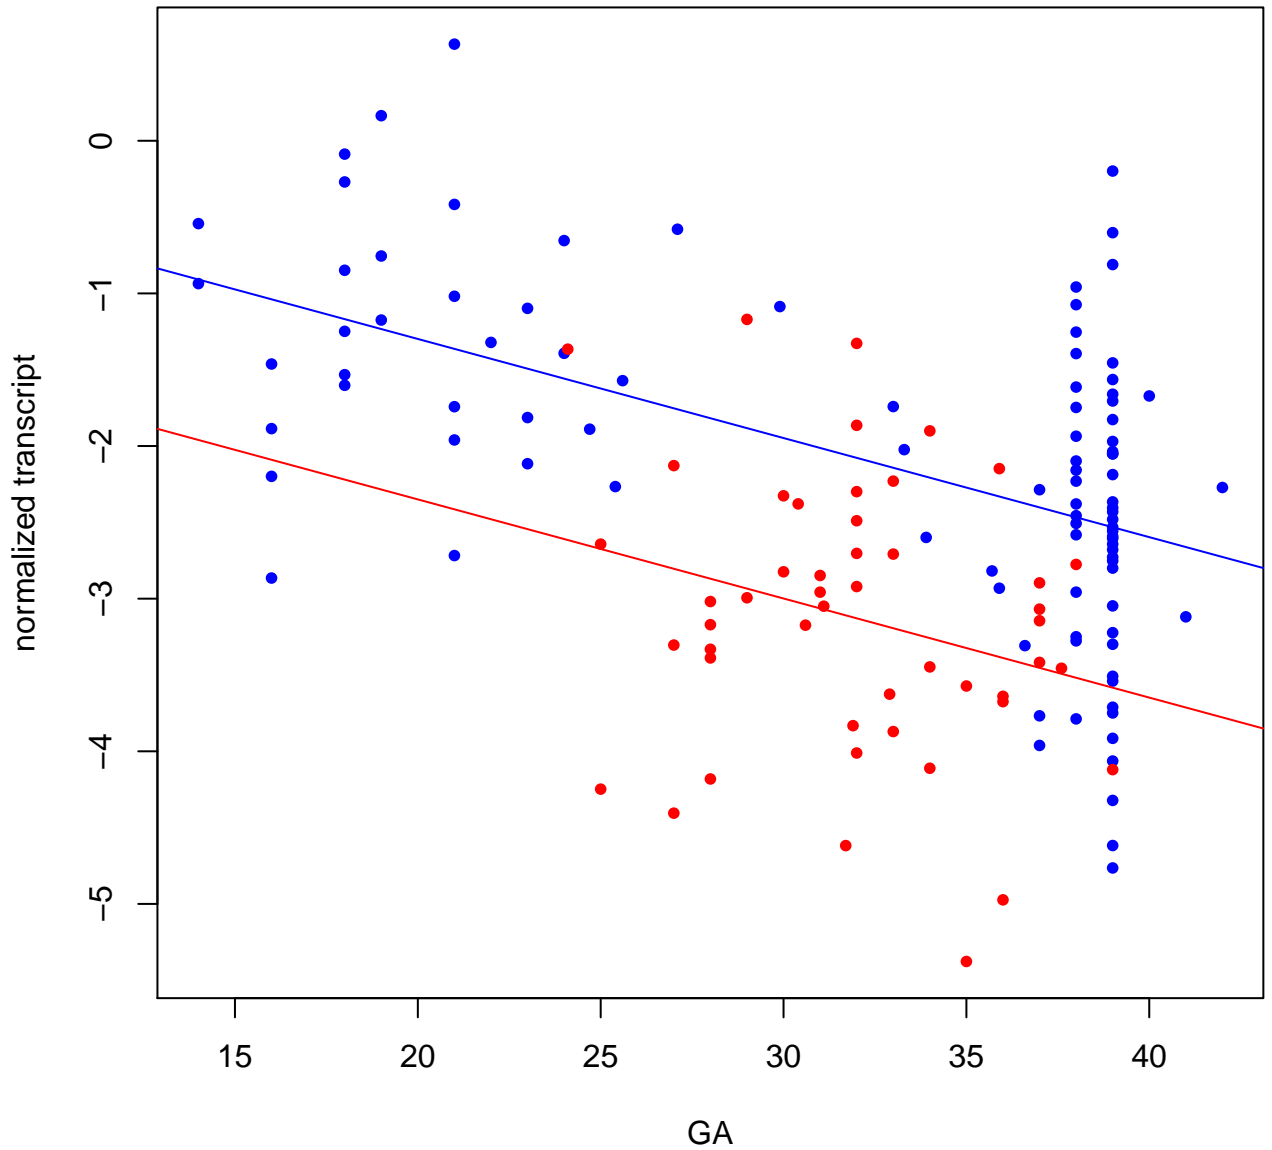

# 232139\_s\_at

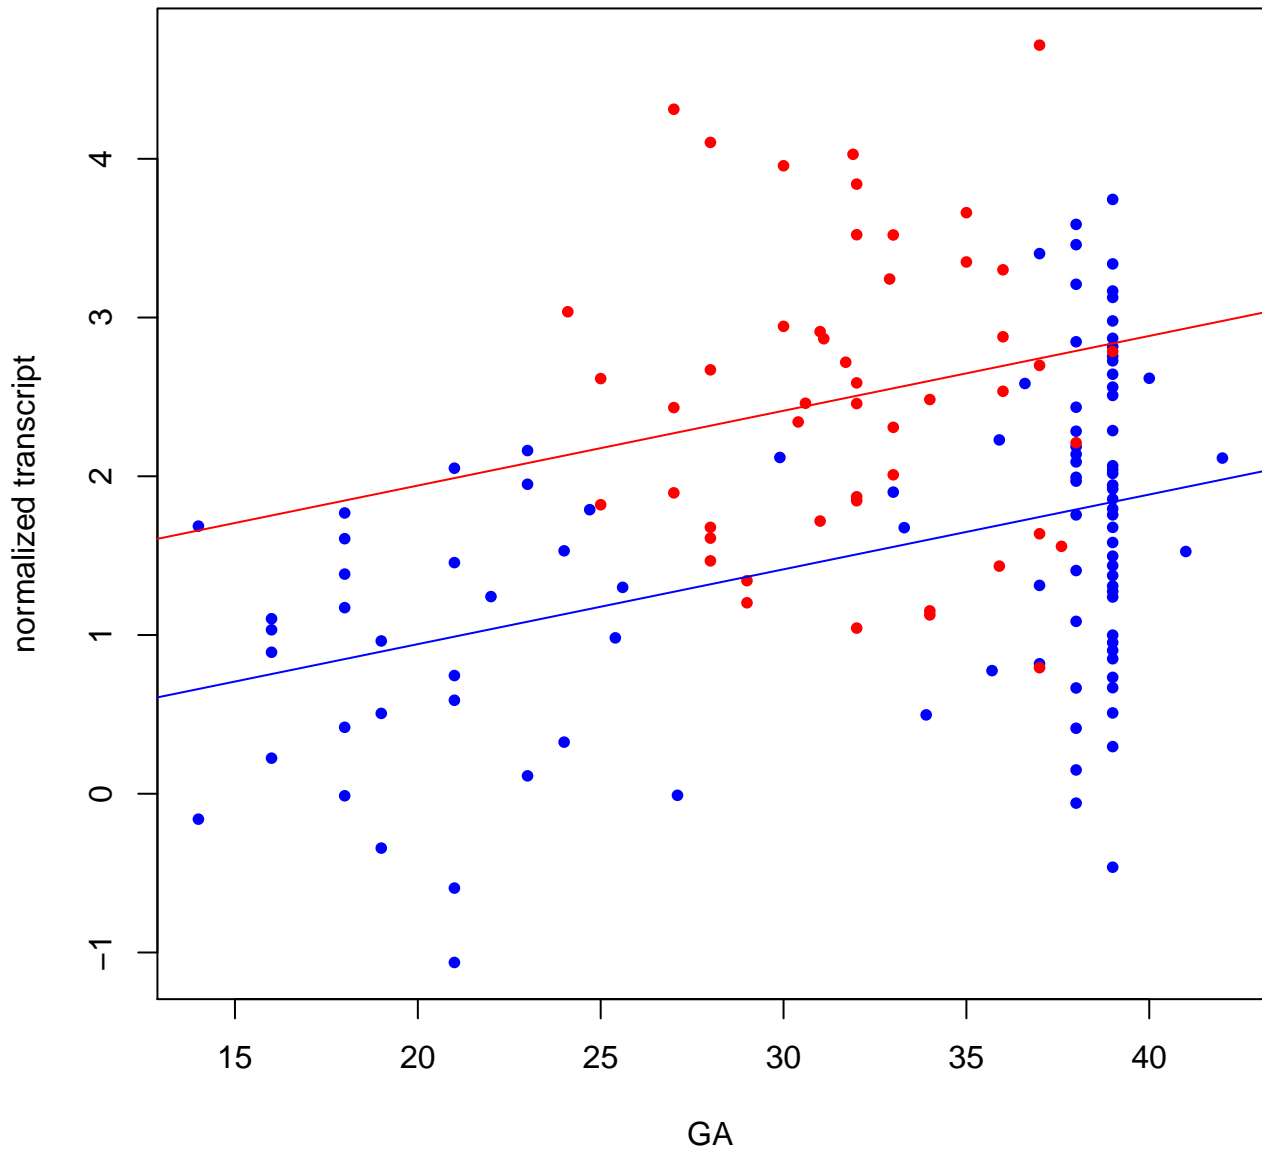

# 238828\_at

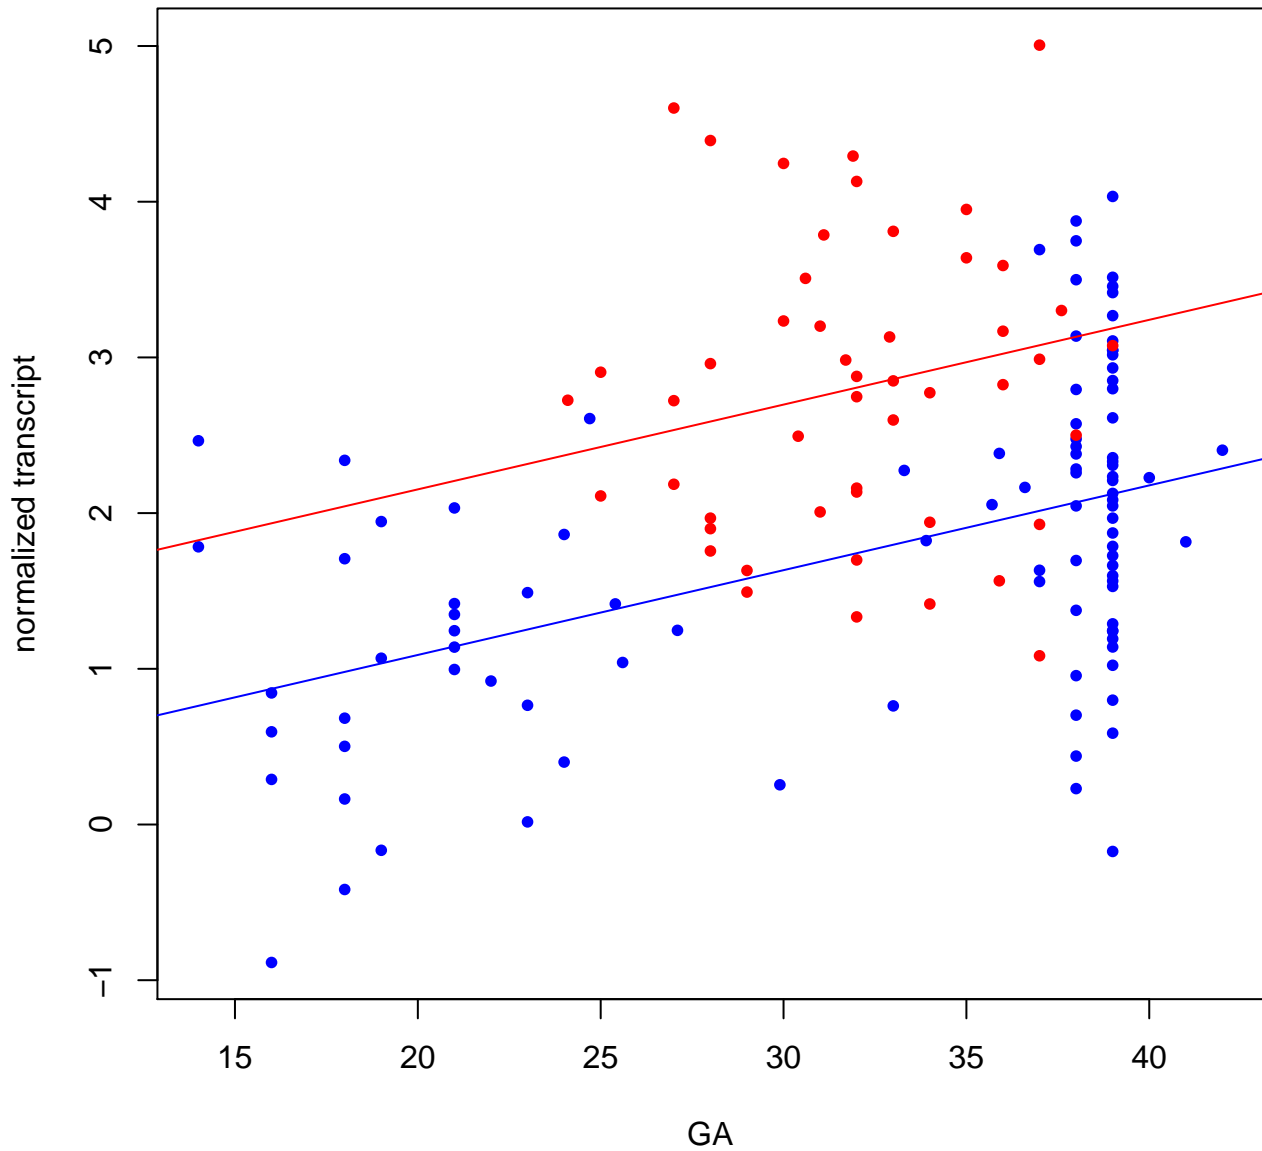



# 227419\_x\_at

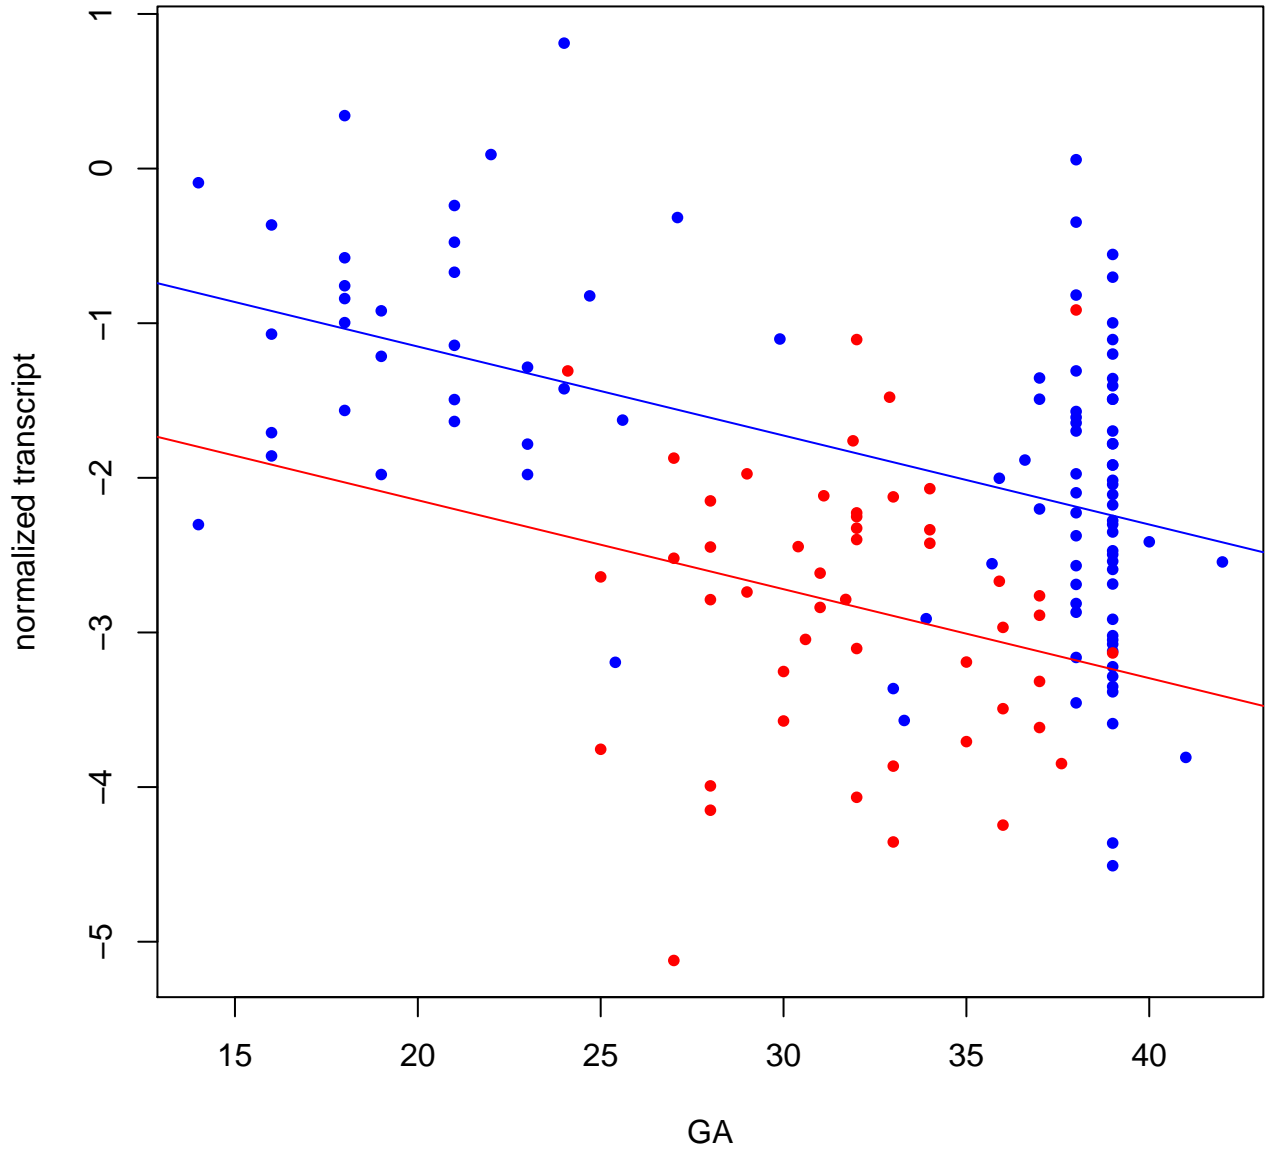



# 224801\_at

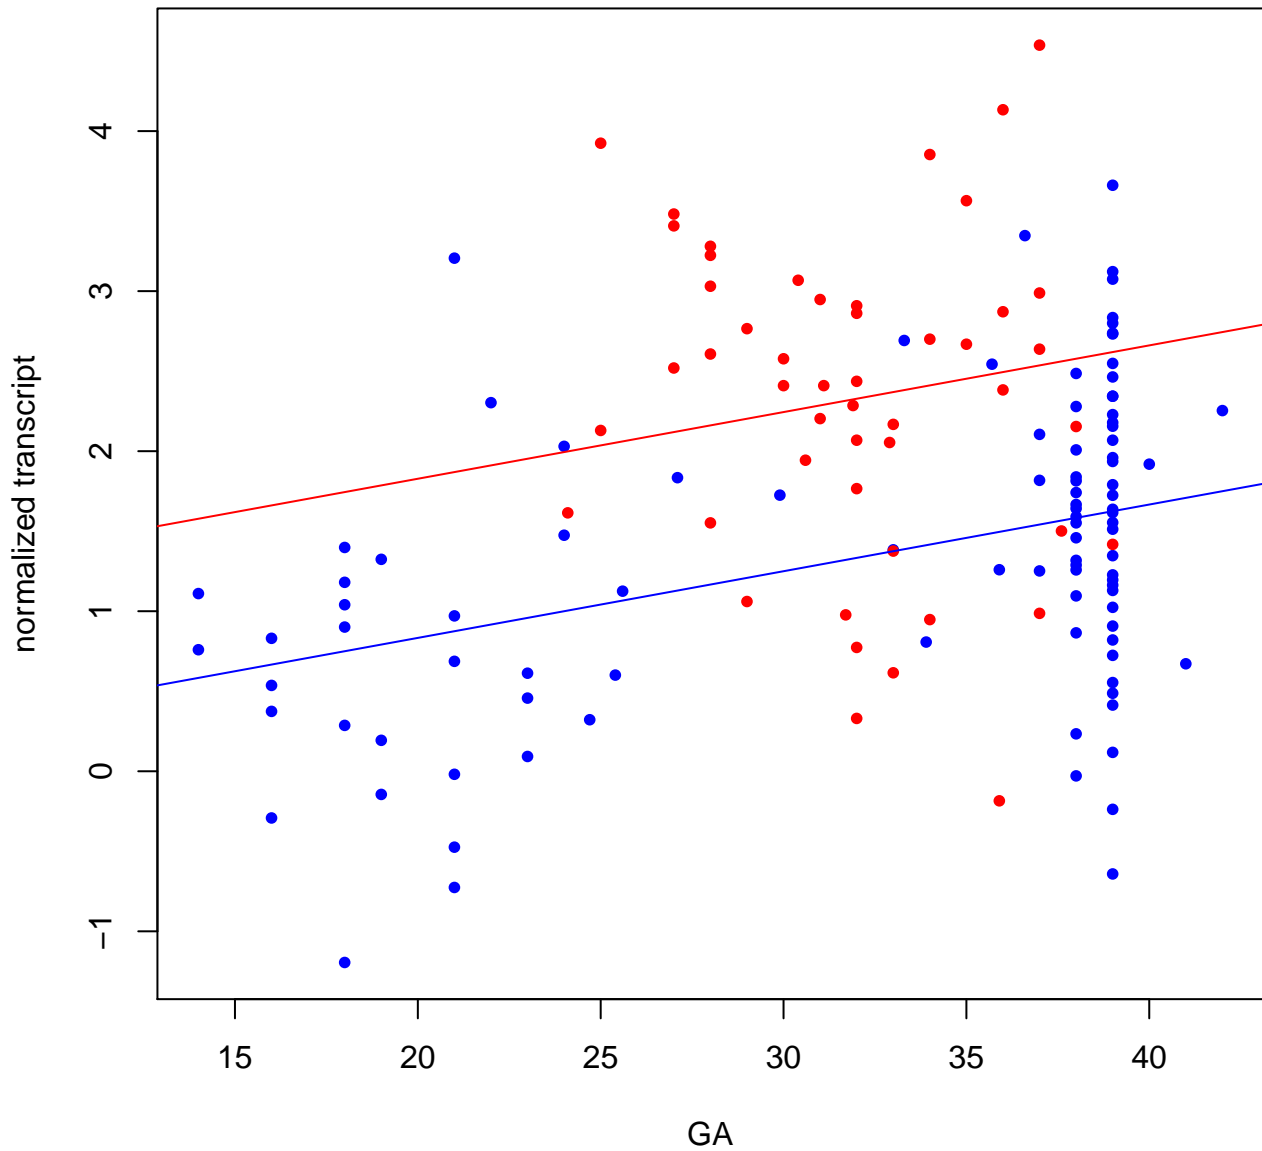

# 226769\_at

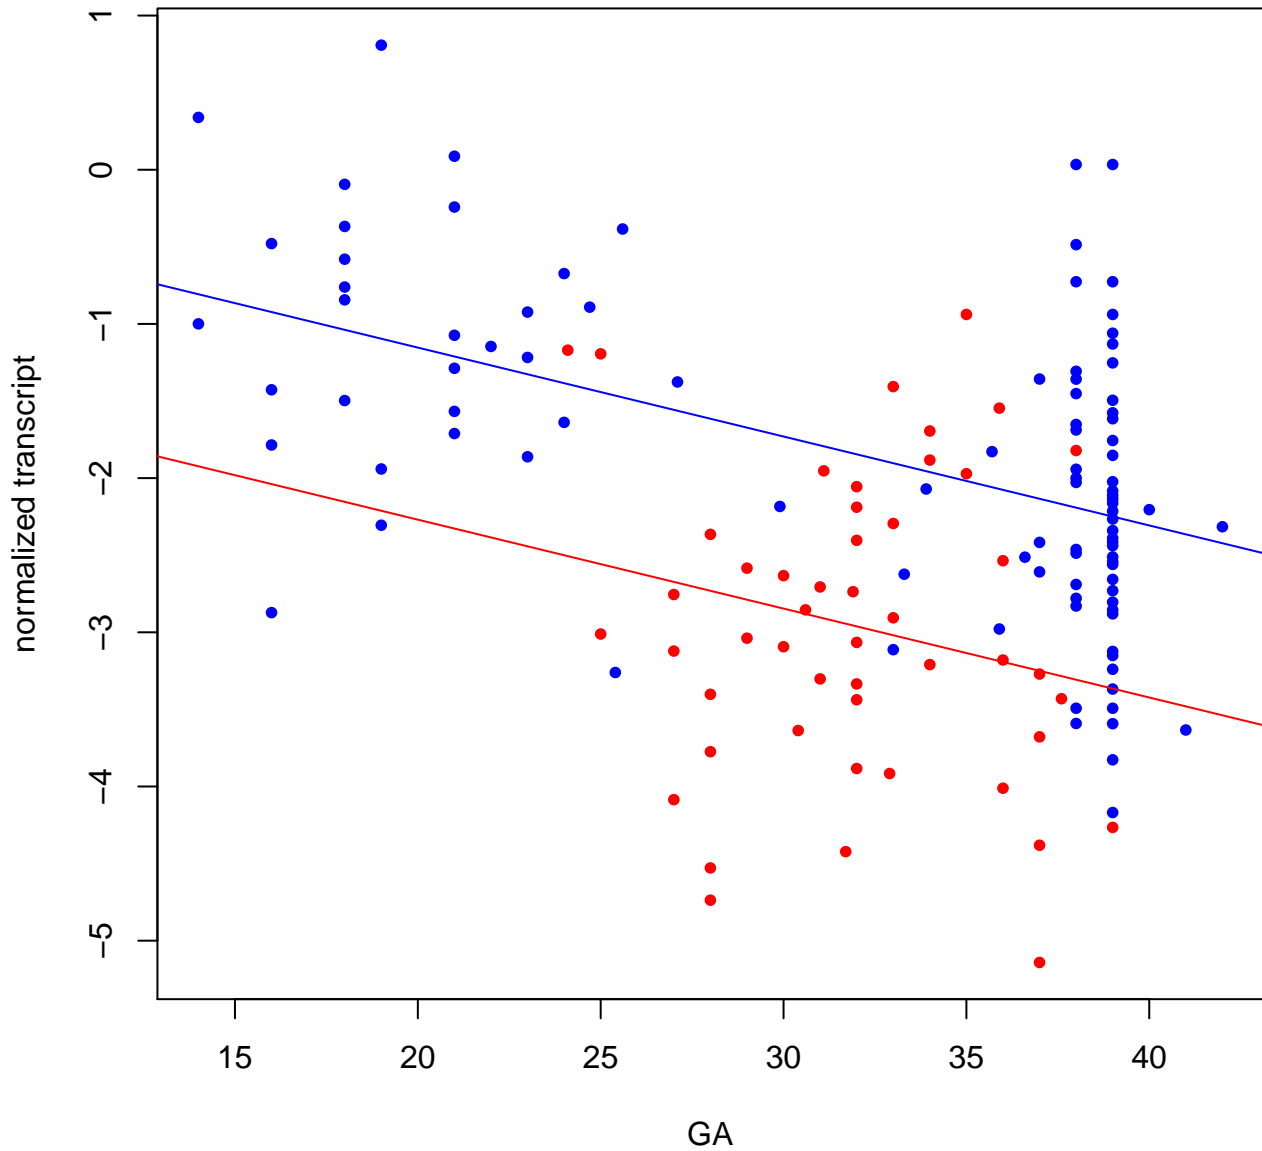

# 224836\_at

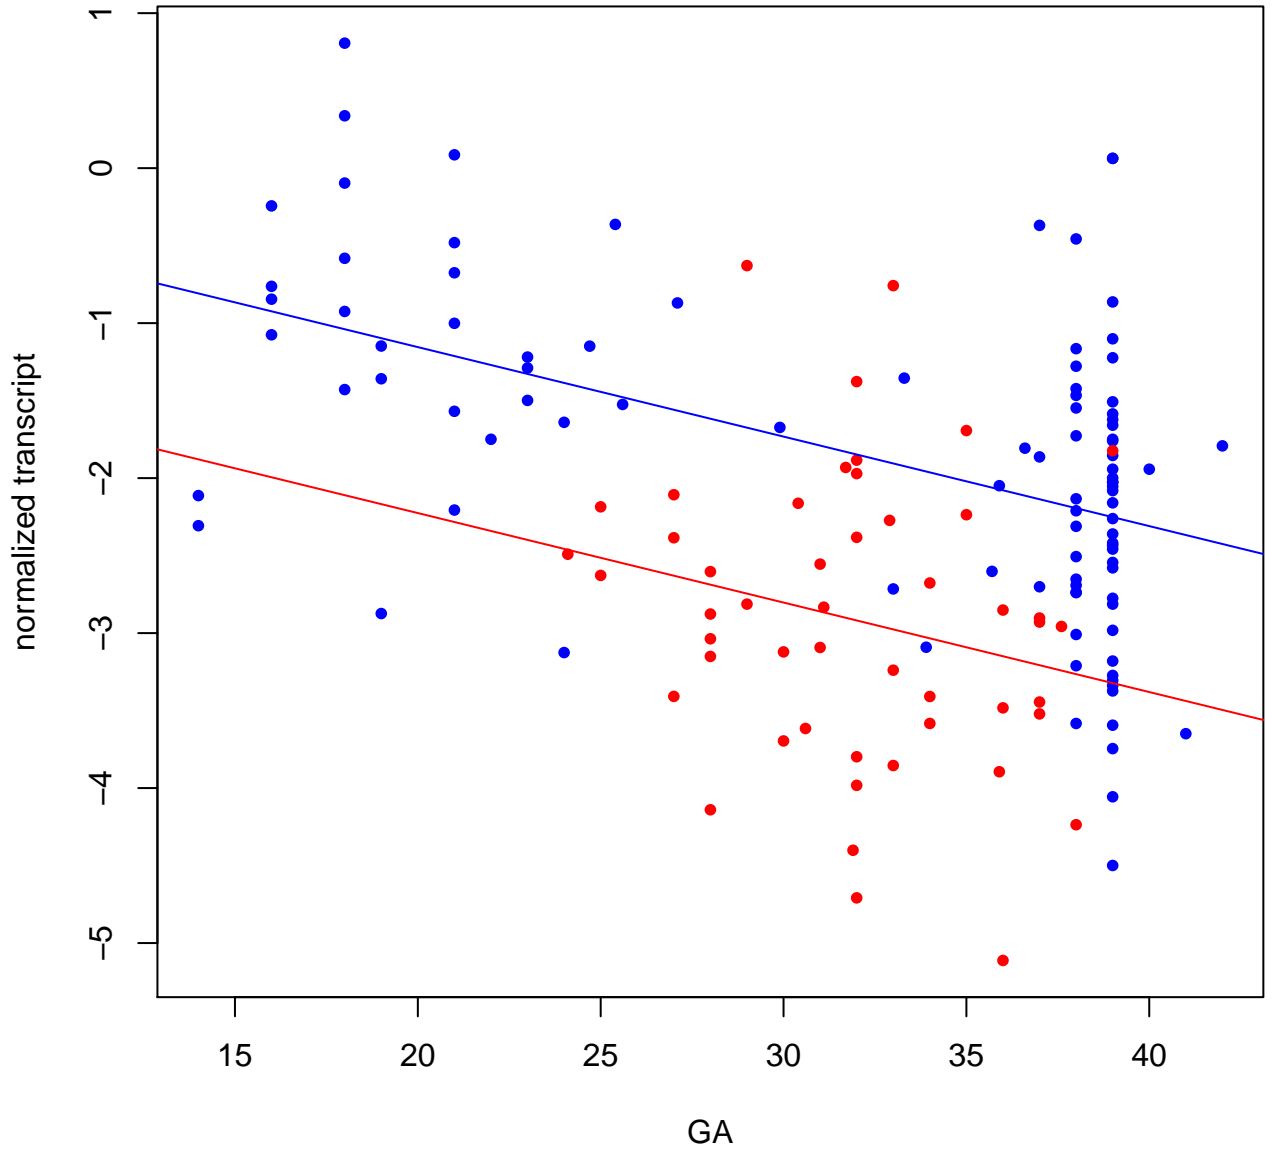

Supplement: pone.0069848.s001.pdf [file pone.0069848.s001.pdf]
