# Supplementary material for: Differential Gene Expression at the Maternal-Fetal Interface in Preeclampsia Is Influenced by Gestational Age
Source: PubMed Central journal article supplement (PMC3729459; doi:10.1371/journal.pone.0069848), 2013-07-31

# 202233\_s\_at

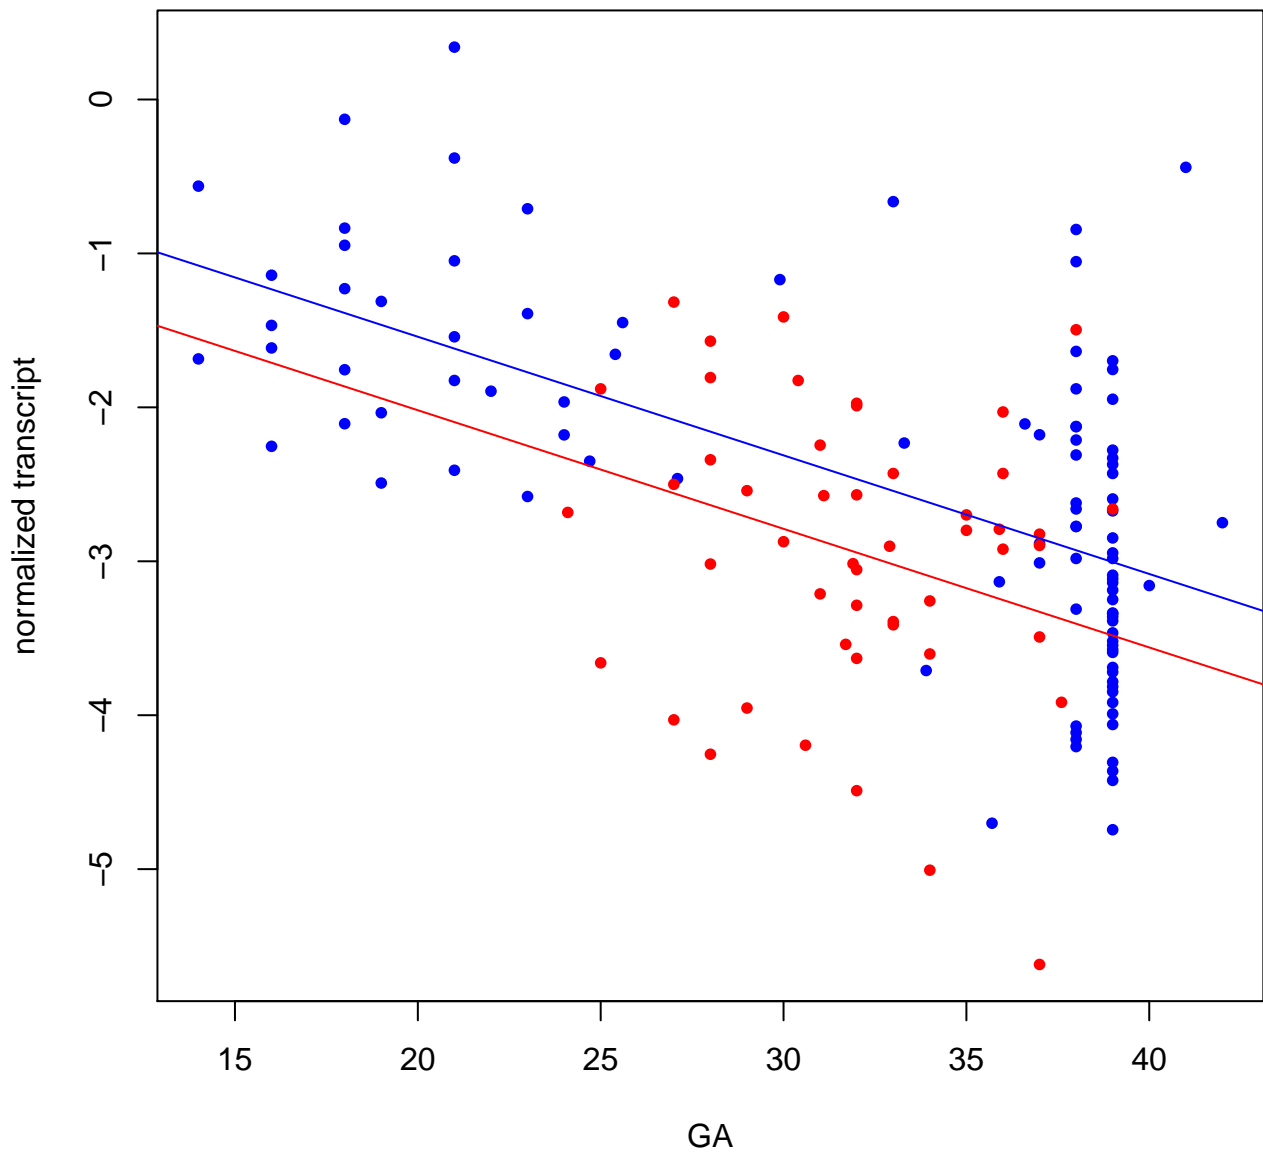

# 218788\_s\_at

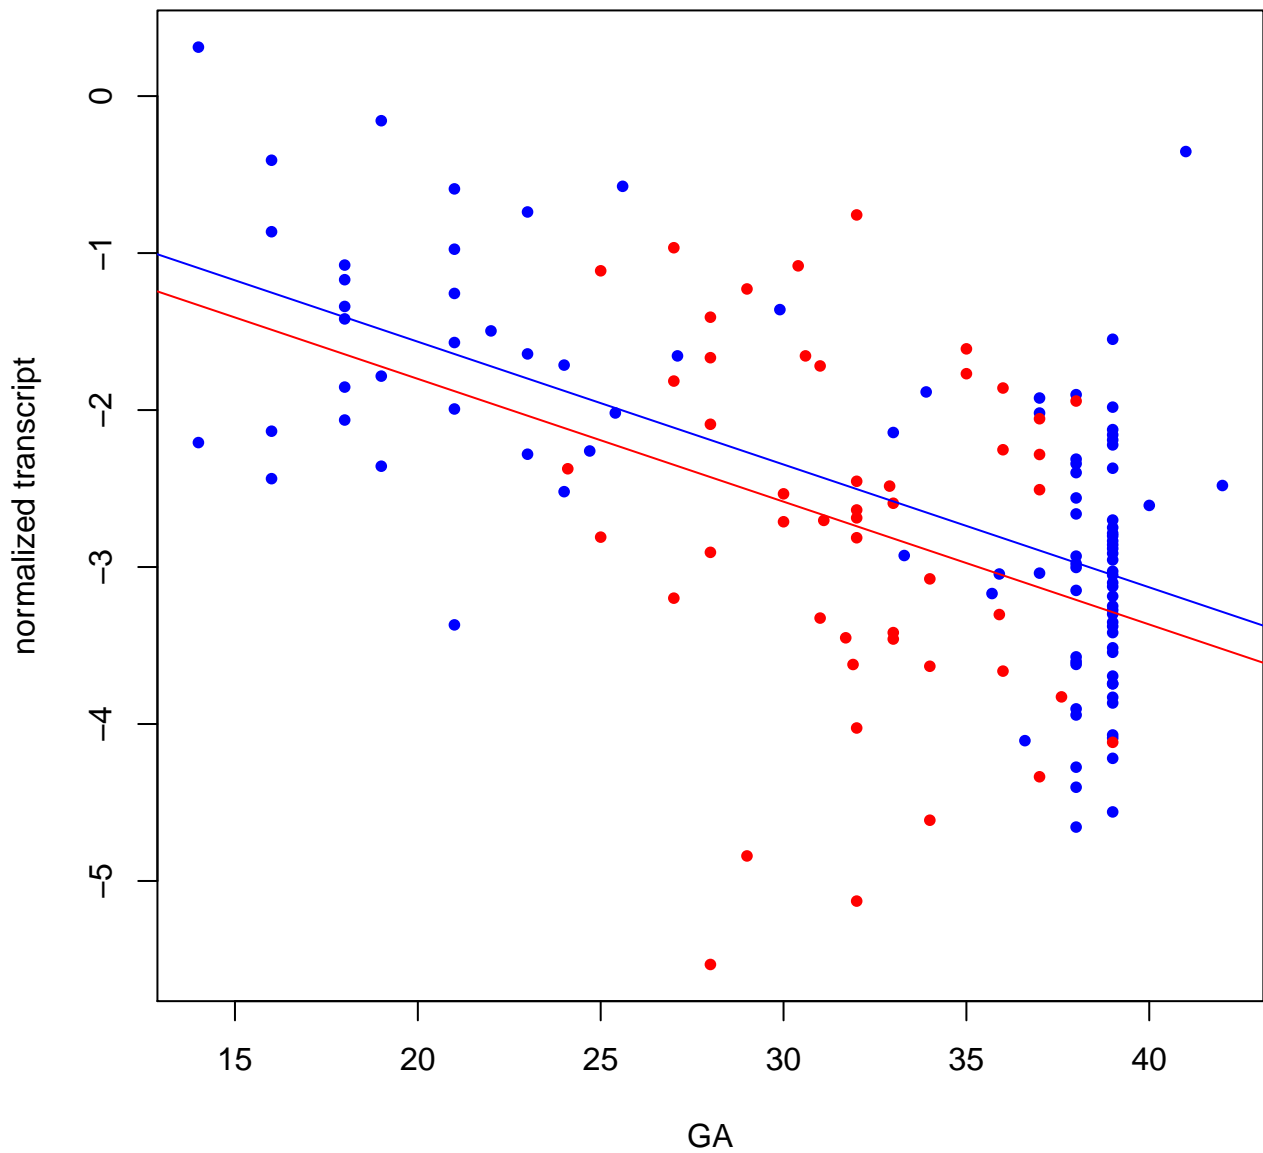

# 208936\_x\_at.1

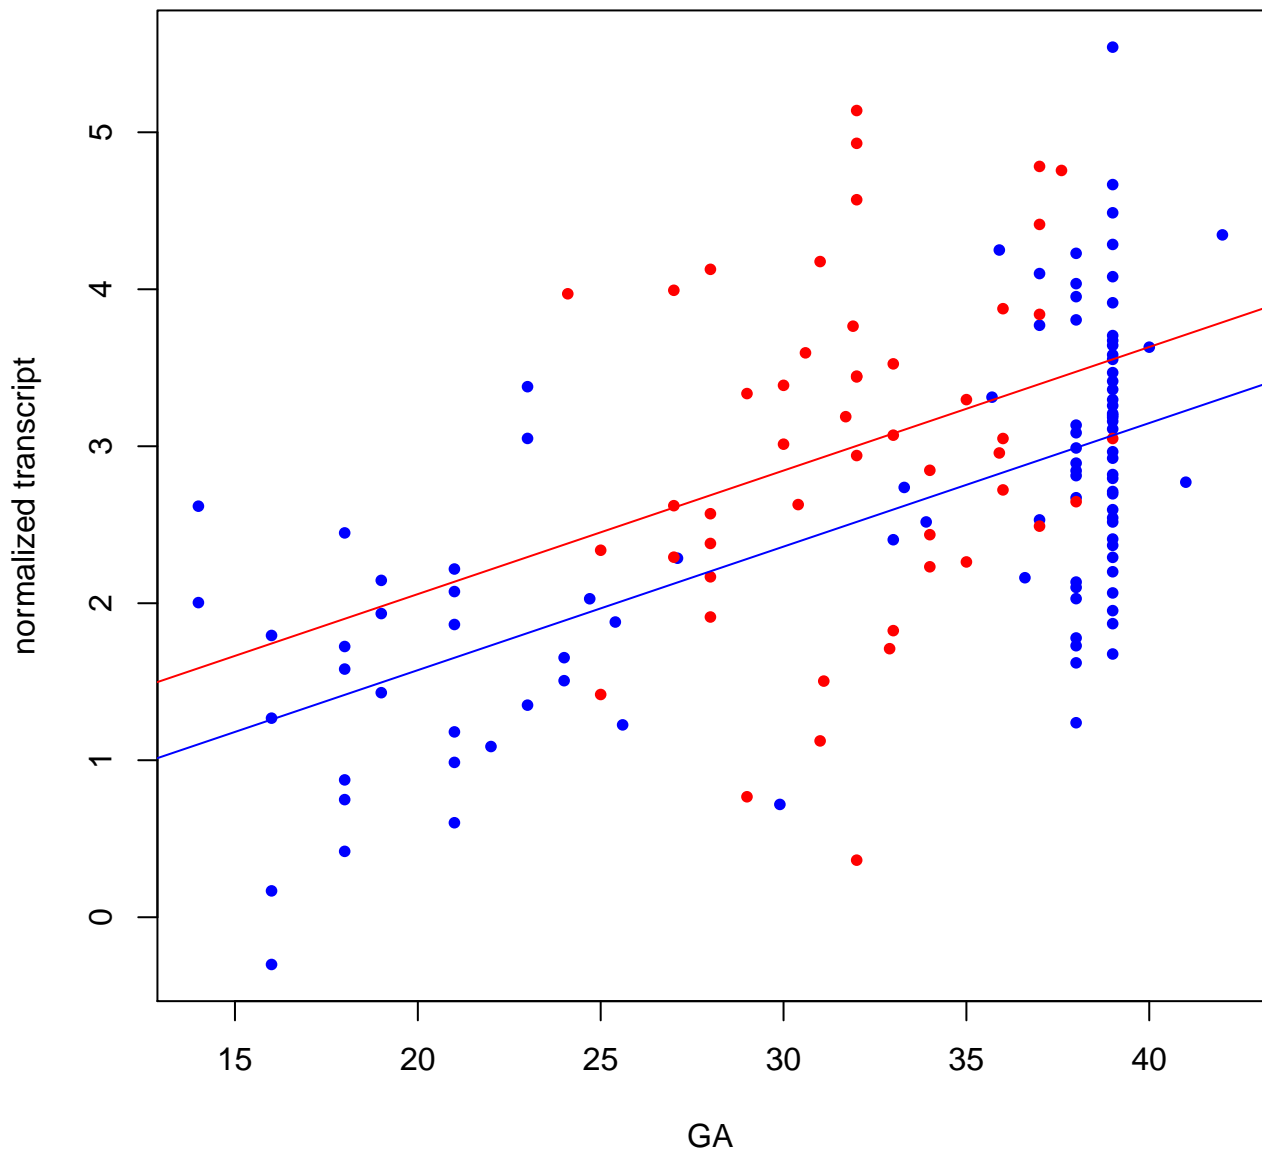

# 208934\_s\_at.1

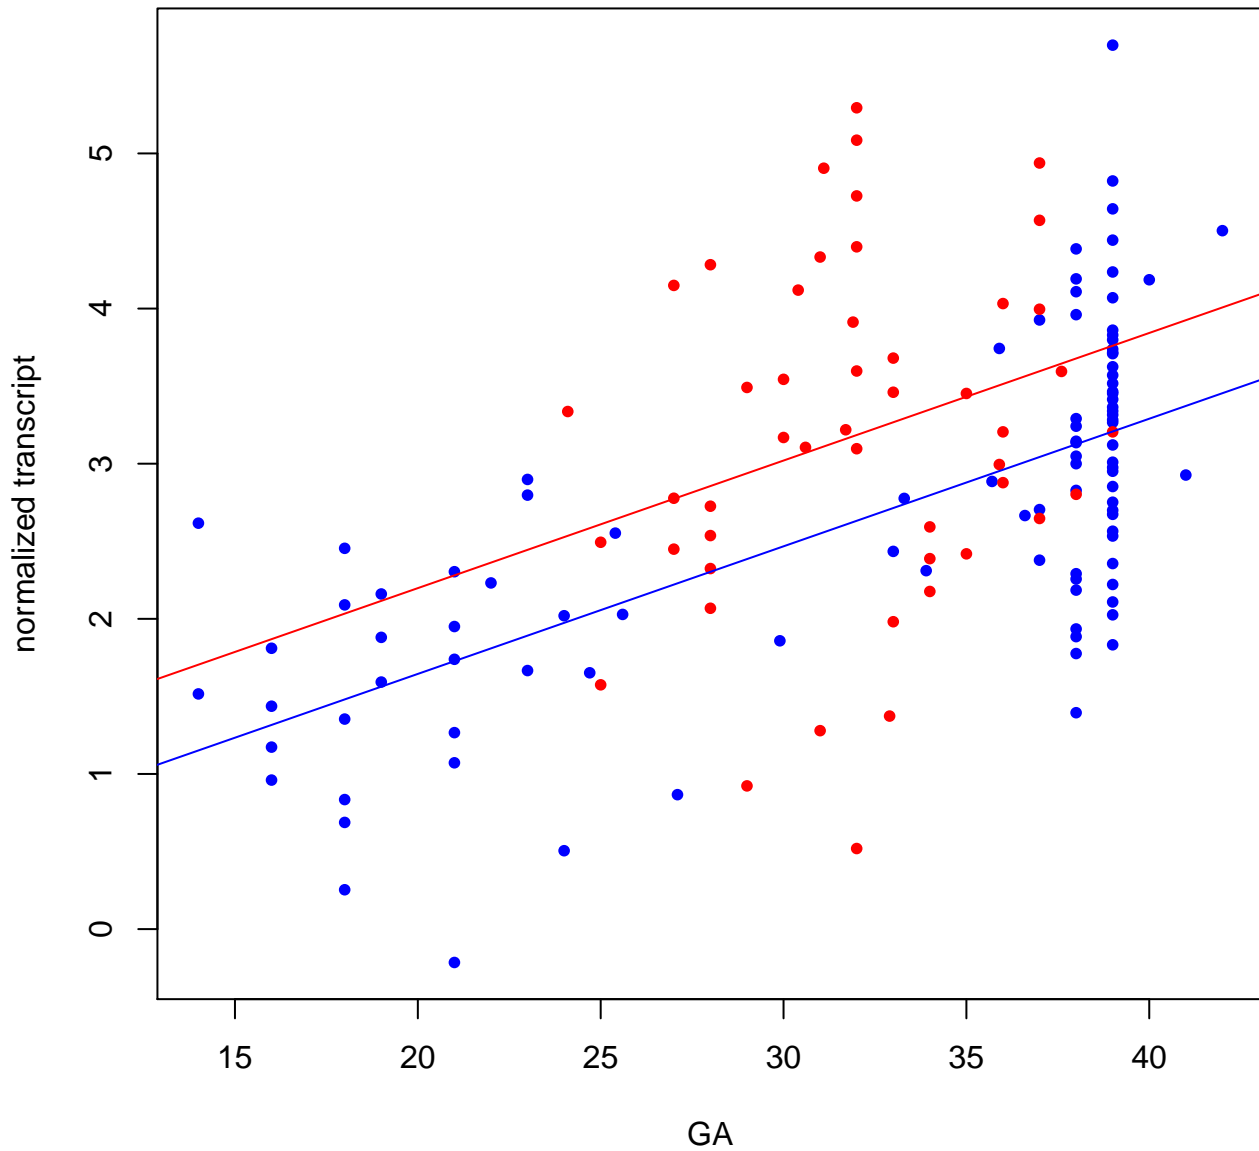

# 202007\_at

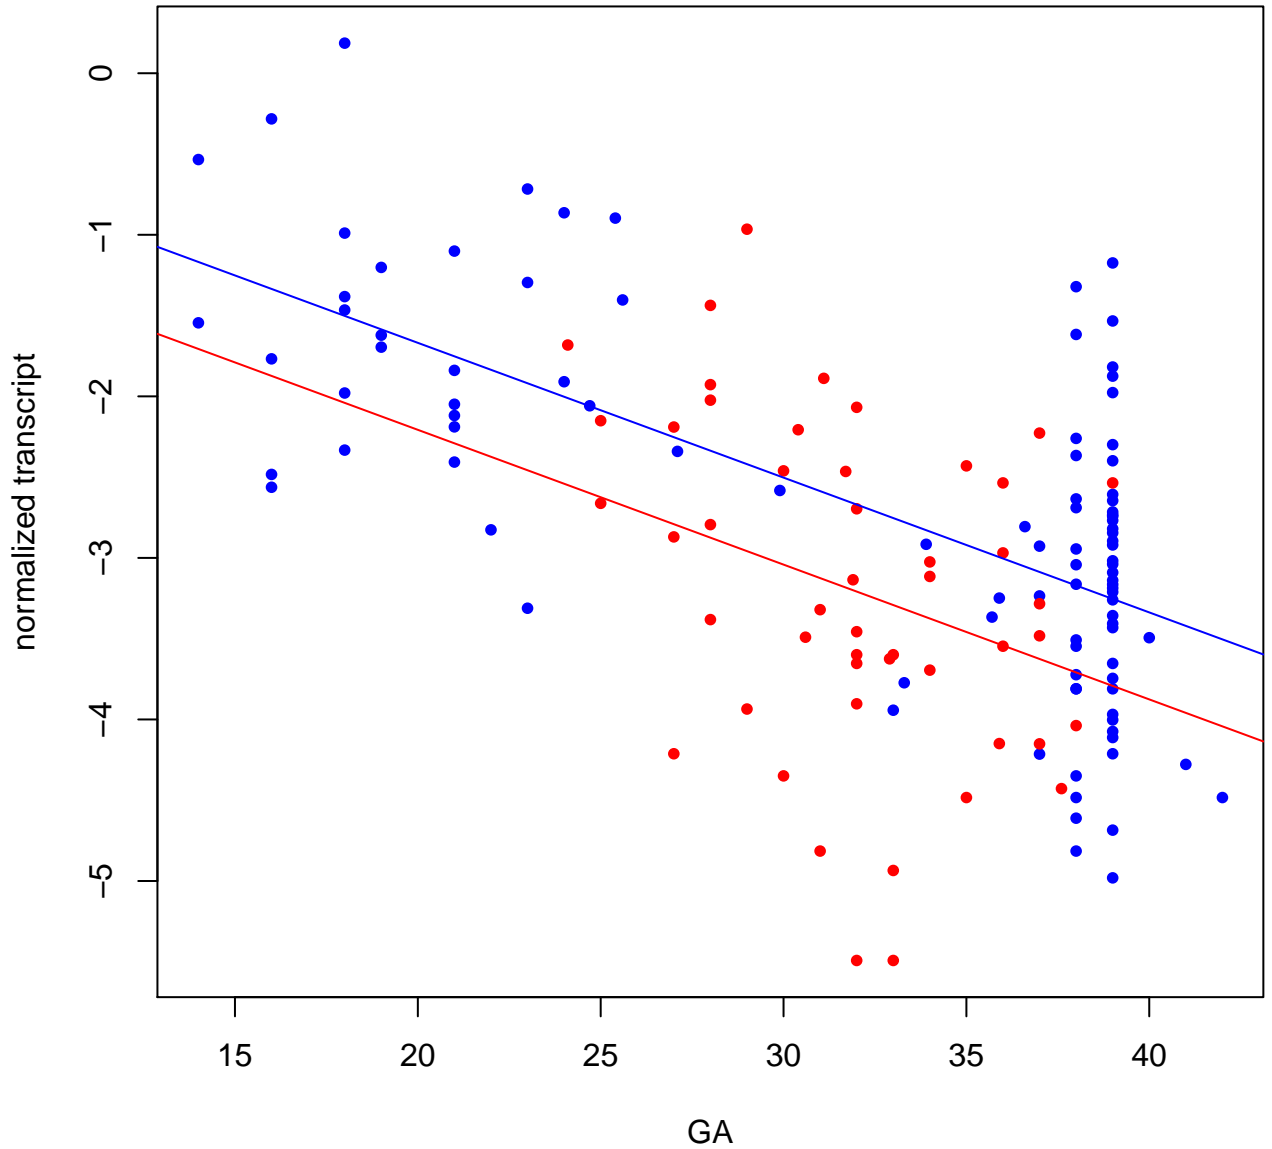



# 212136\_at.1

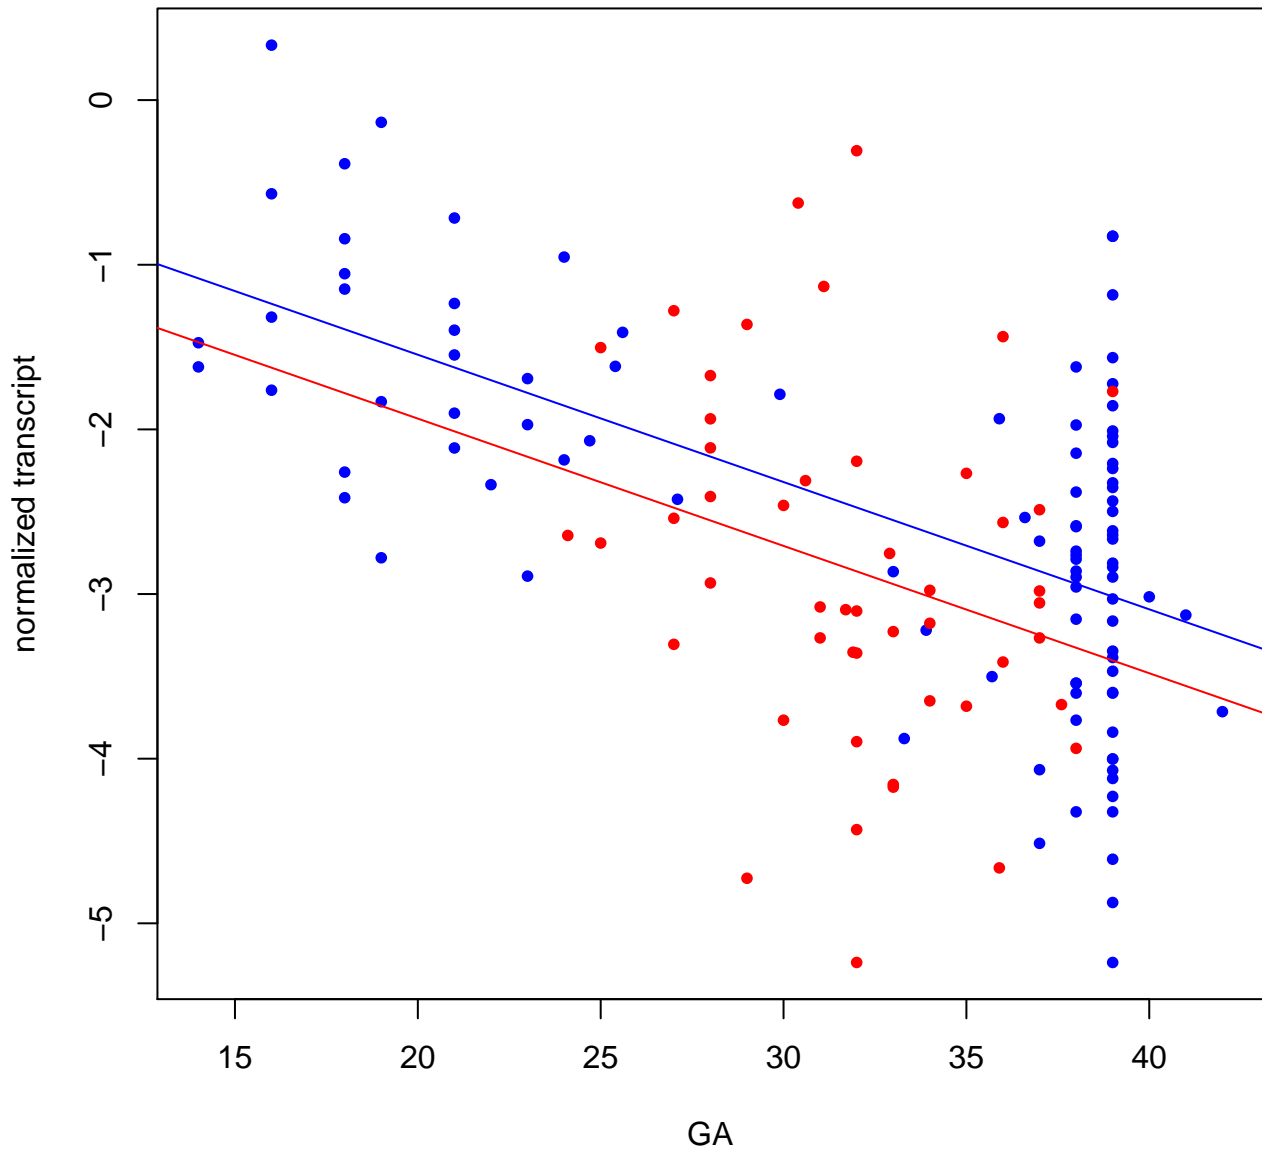

# 201438\_at

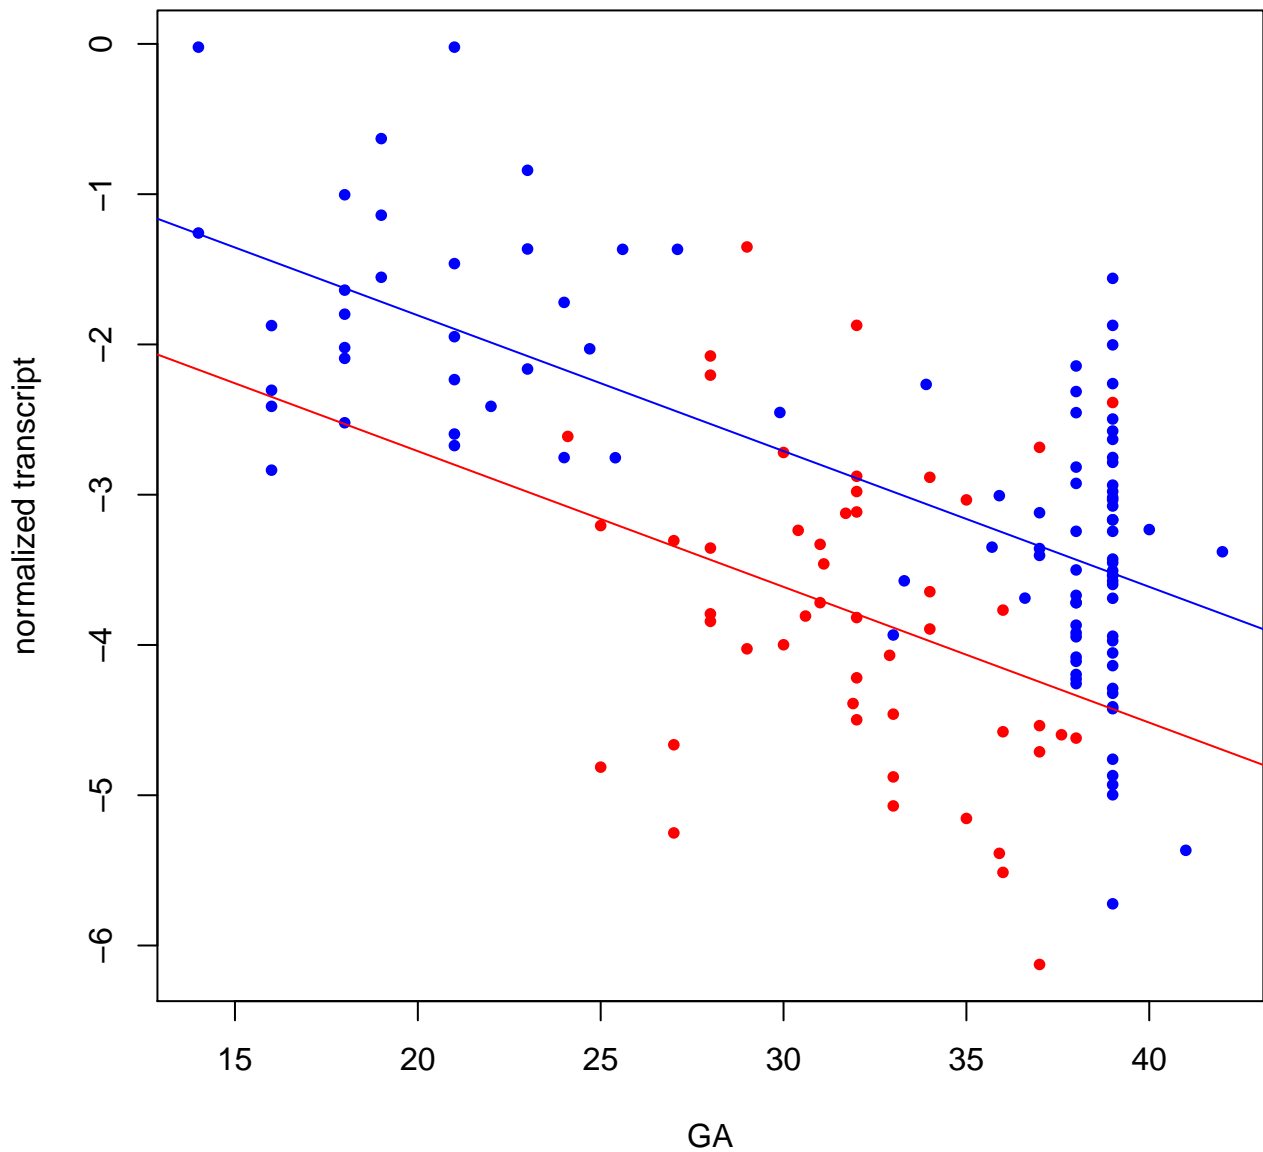



# 221210\_s\_at

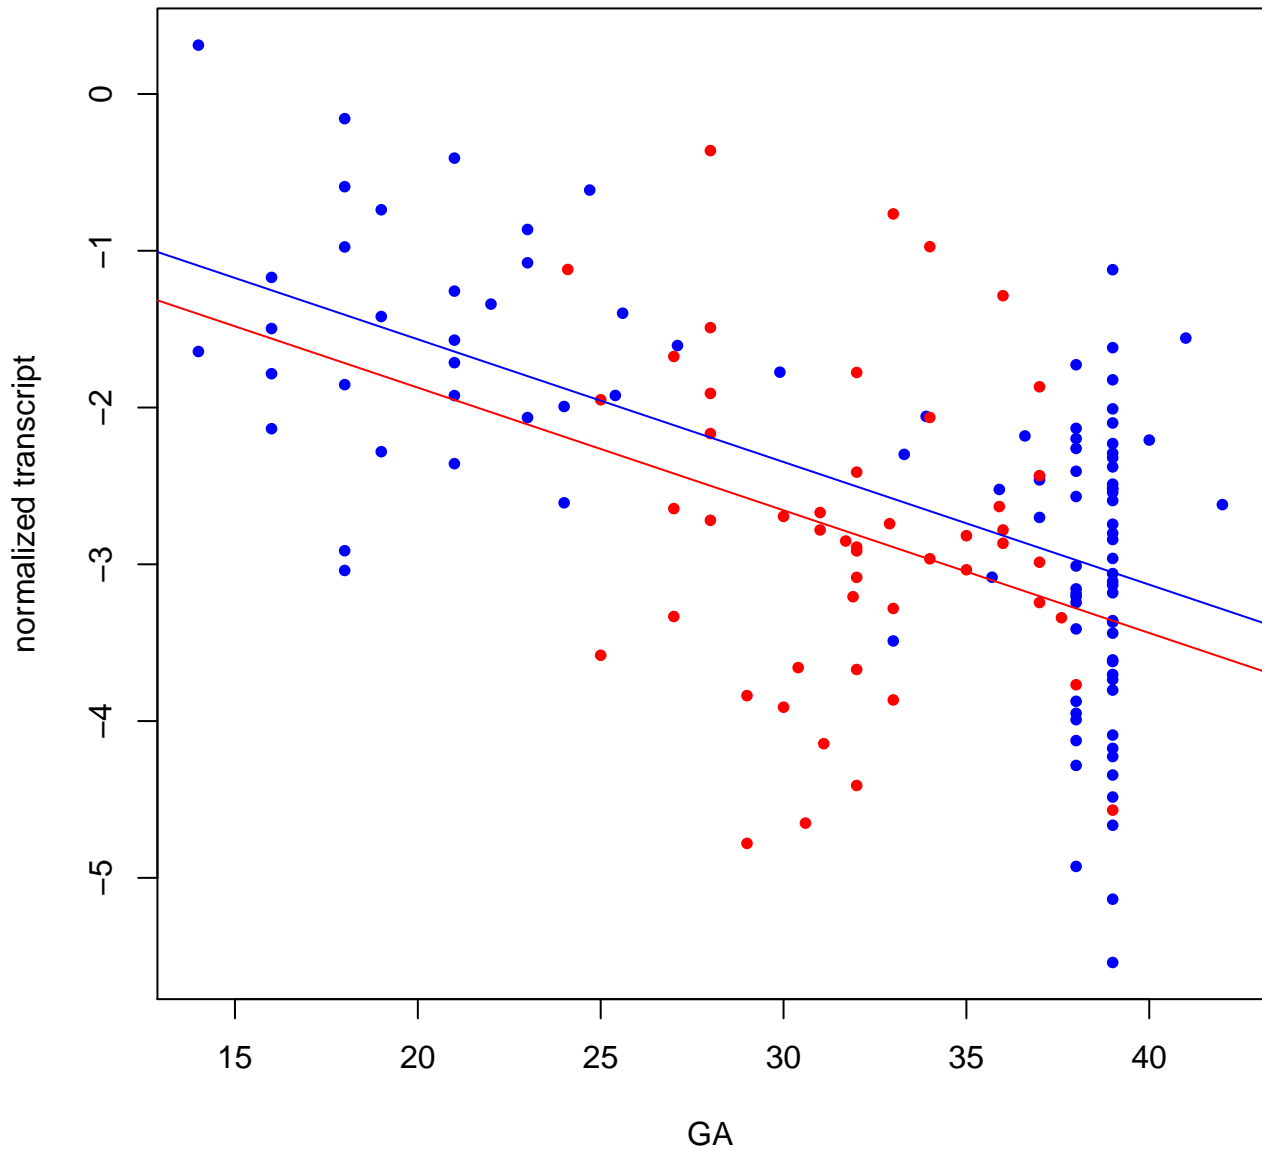

# 215001\_s\_at

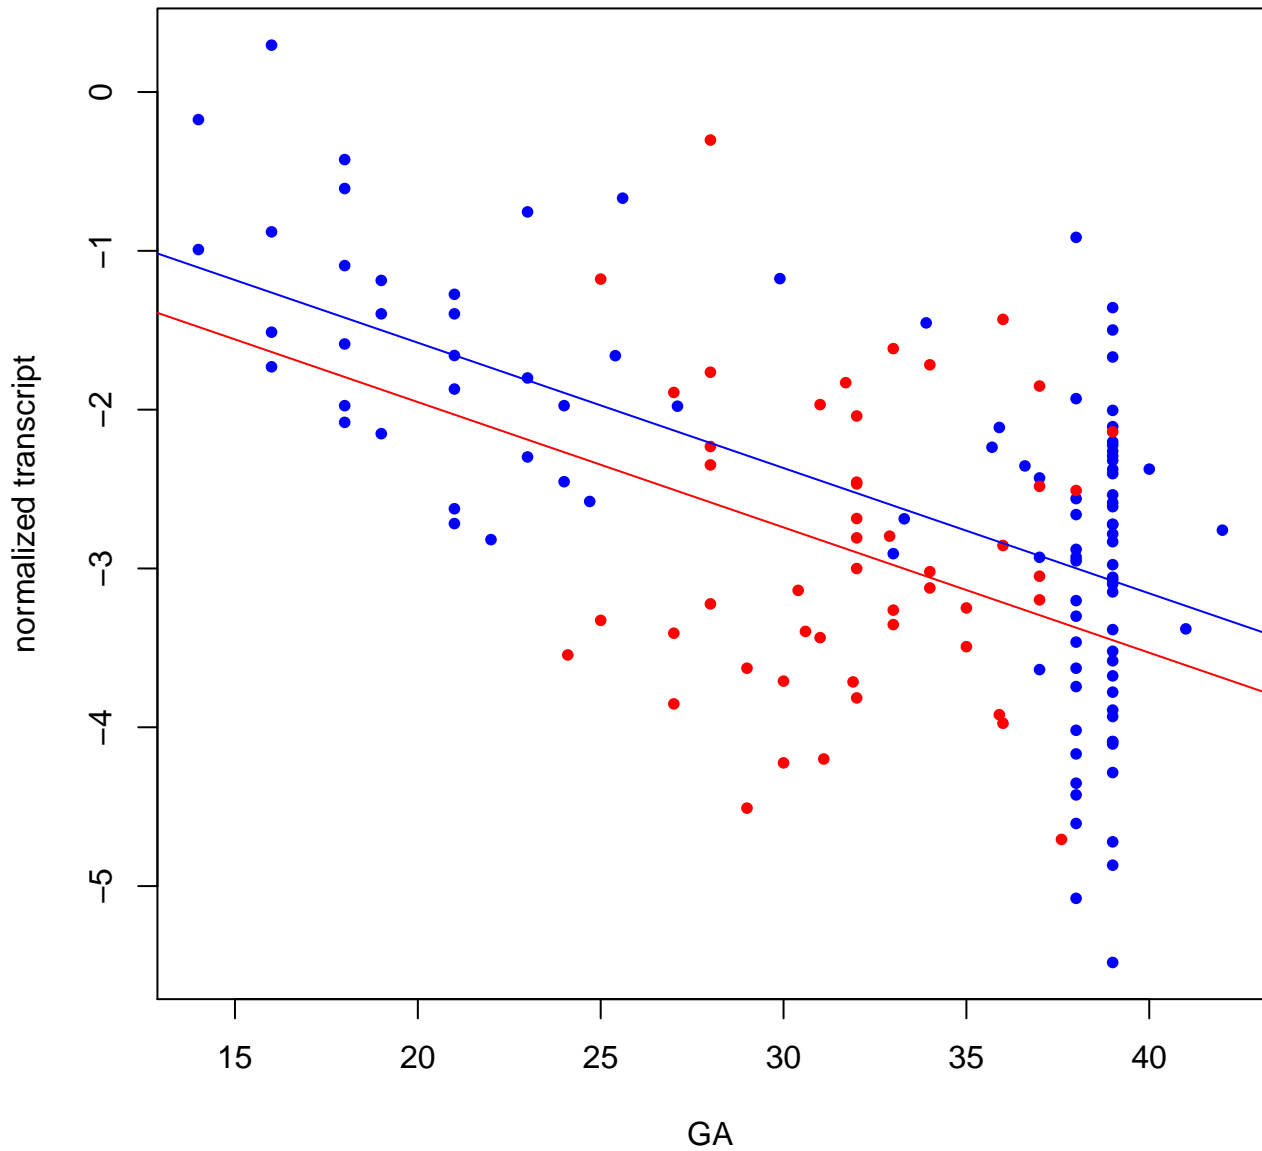

# 215001\_s\_at.2

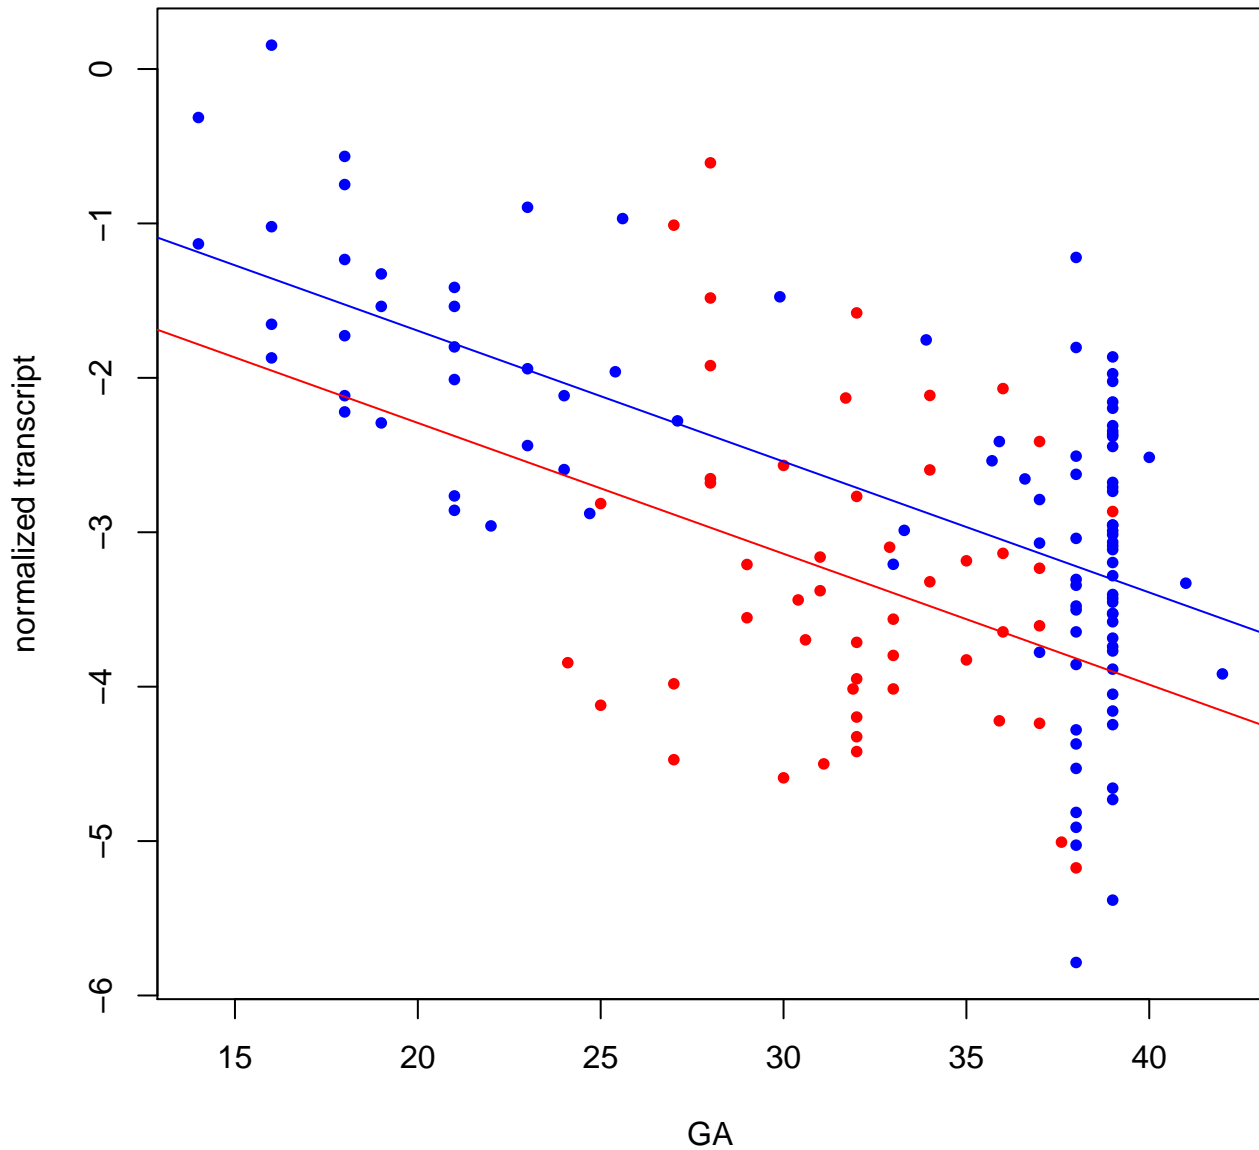

# 209343\_at

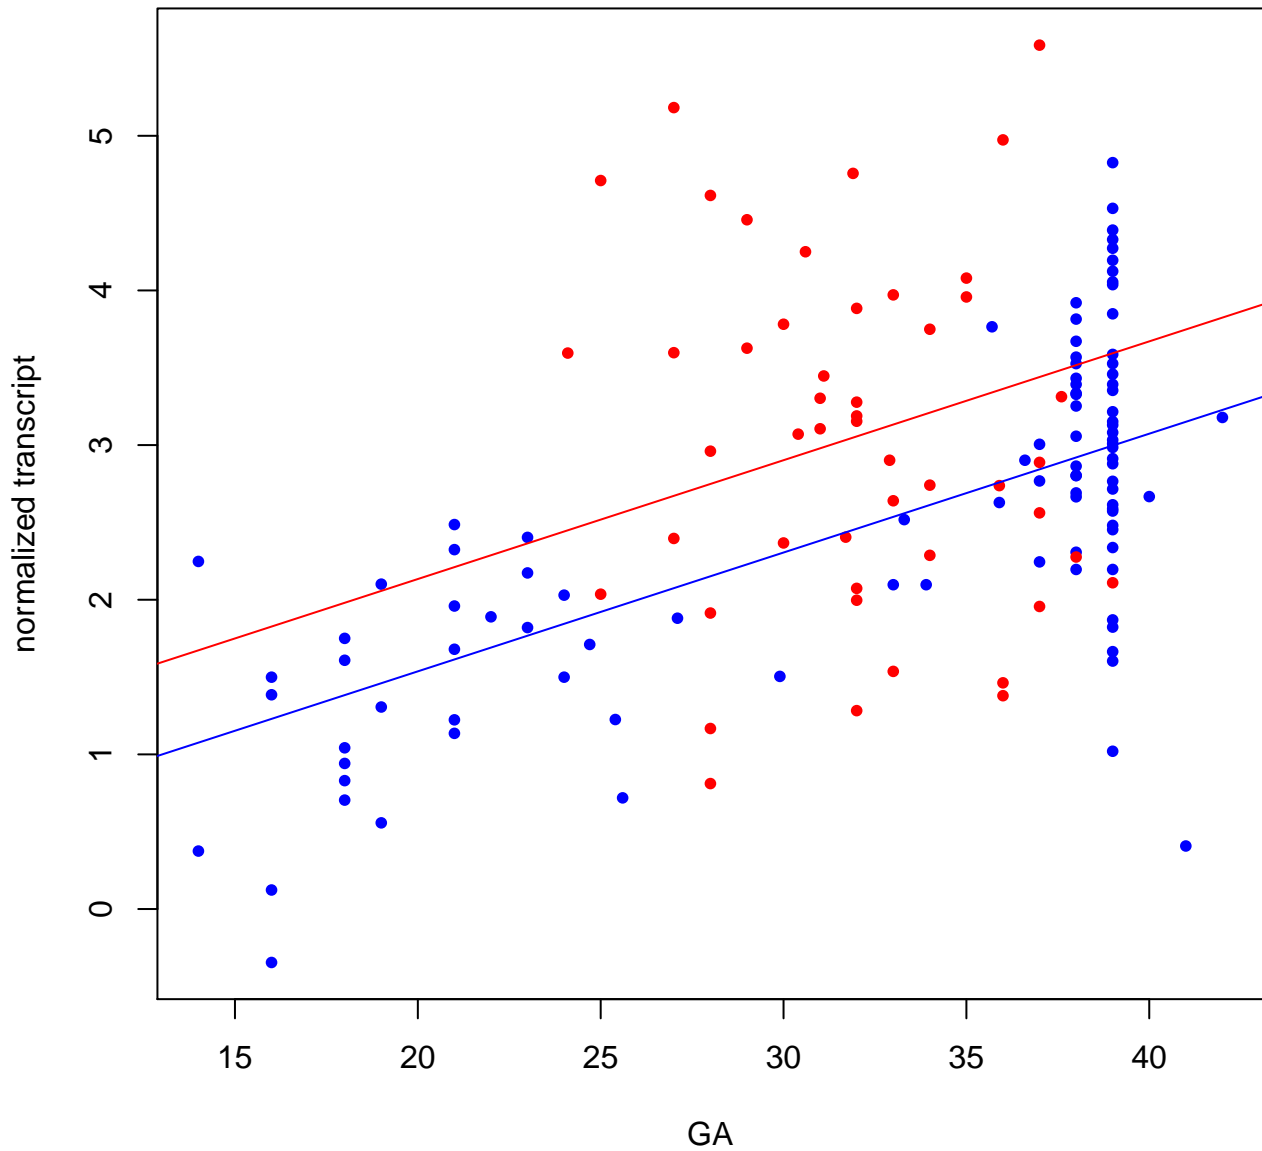

# 221561\_at

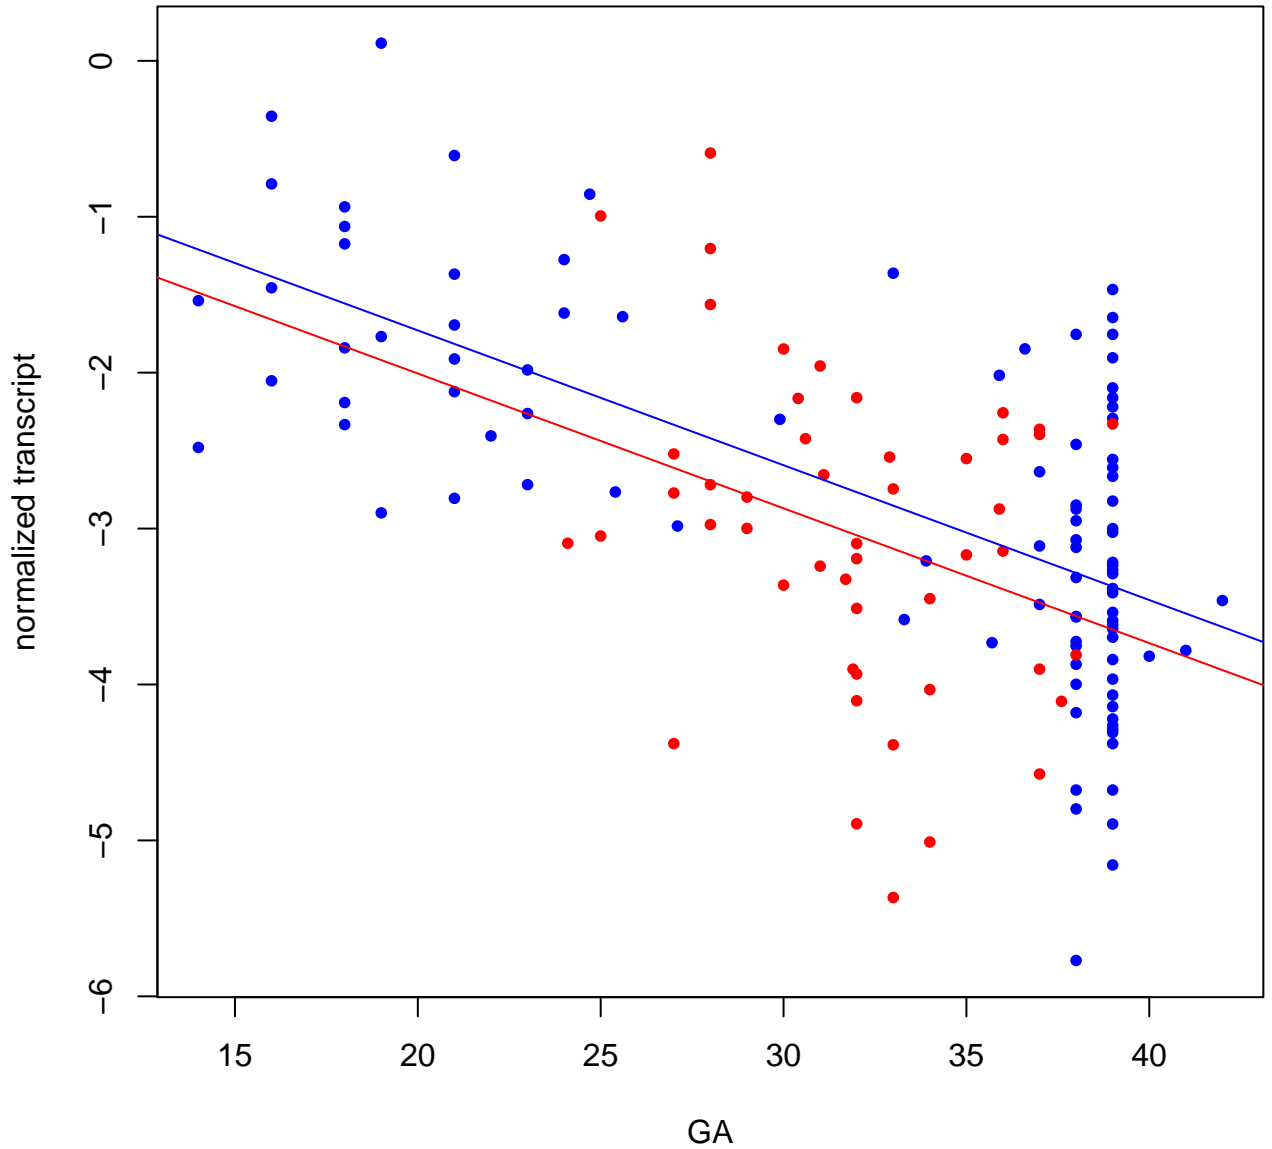

# 201243\_s\_at.1

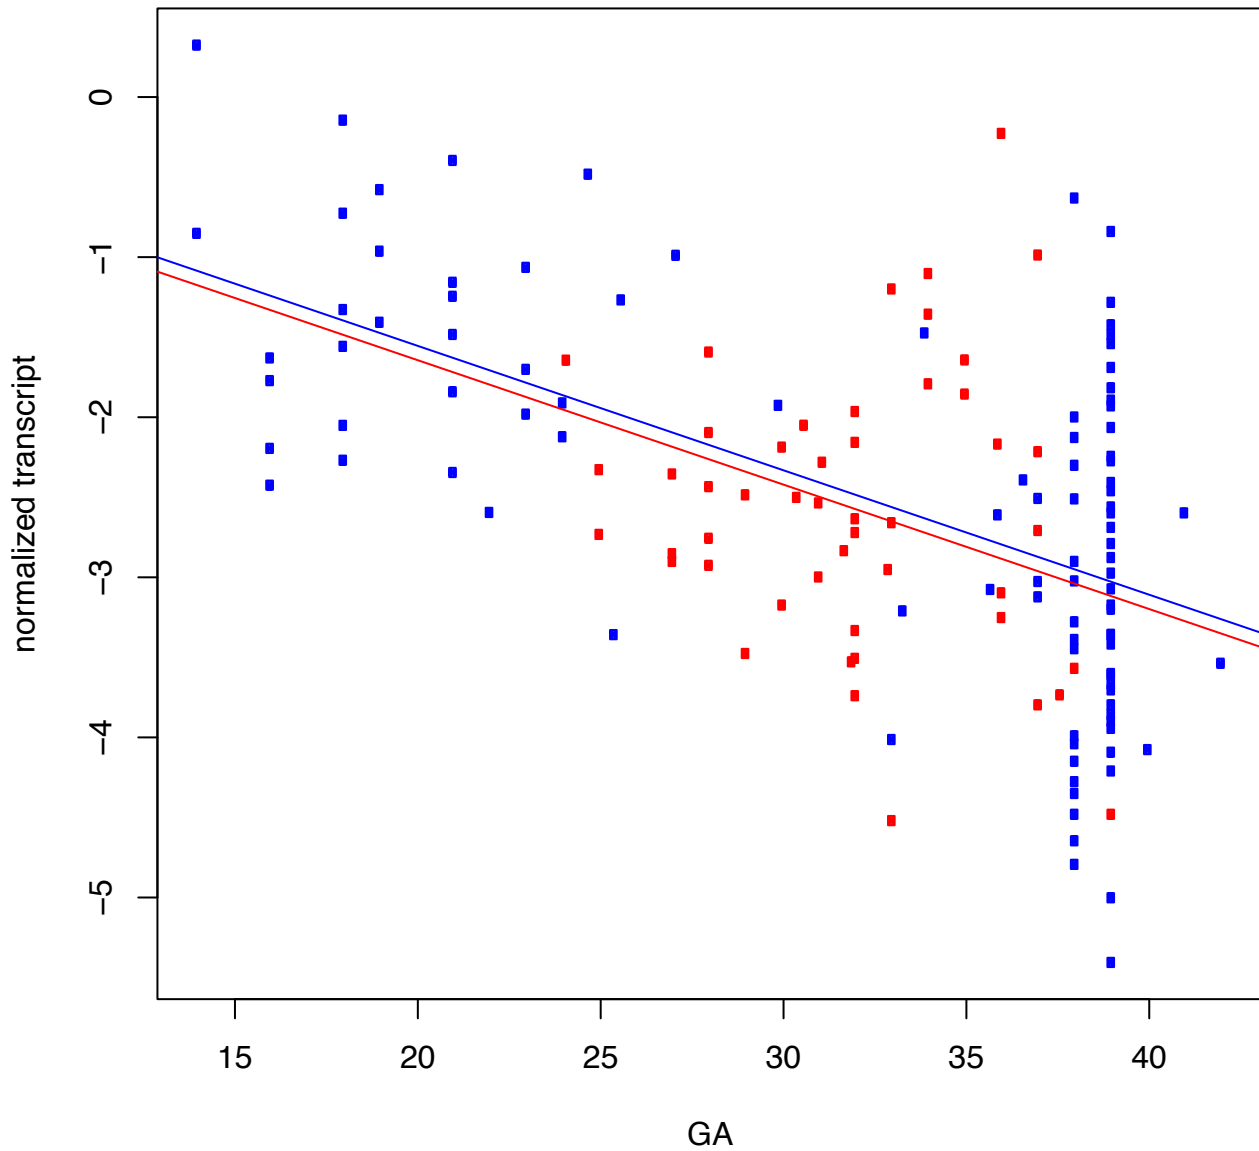



# 221730\_at

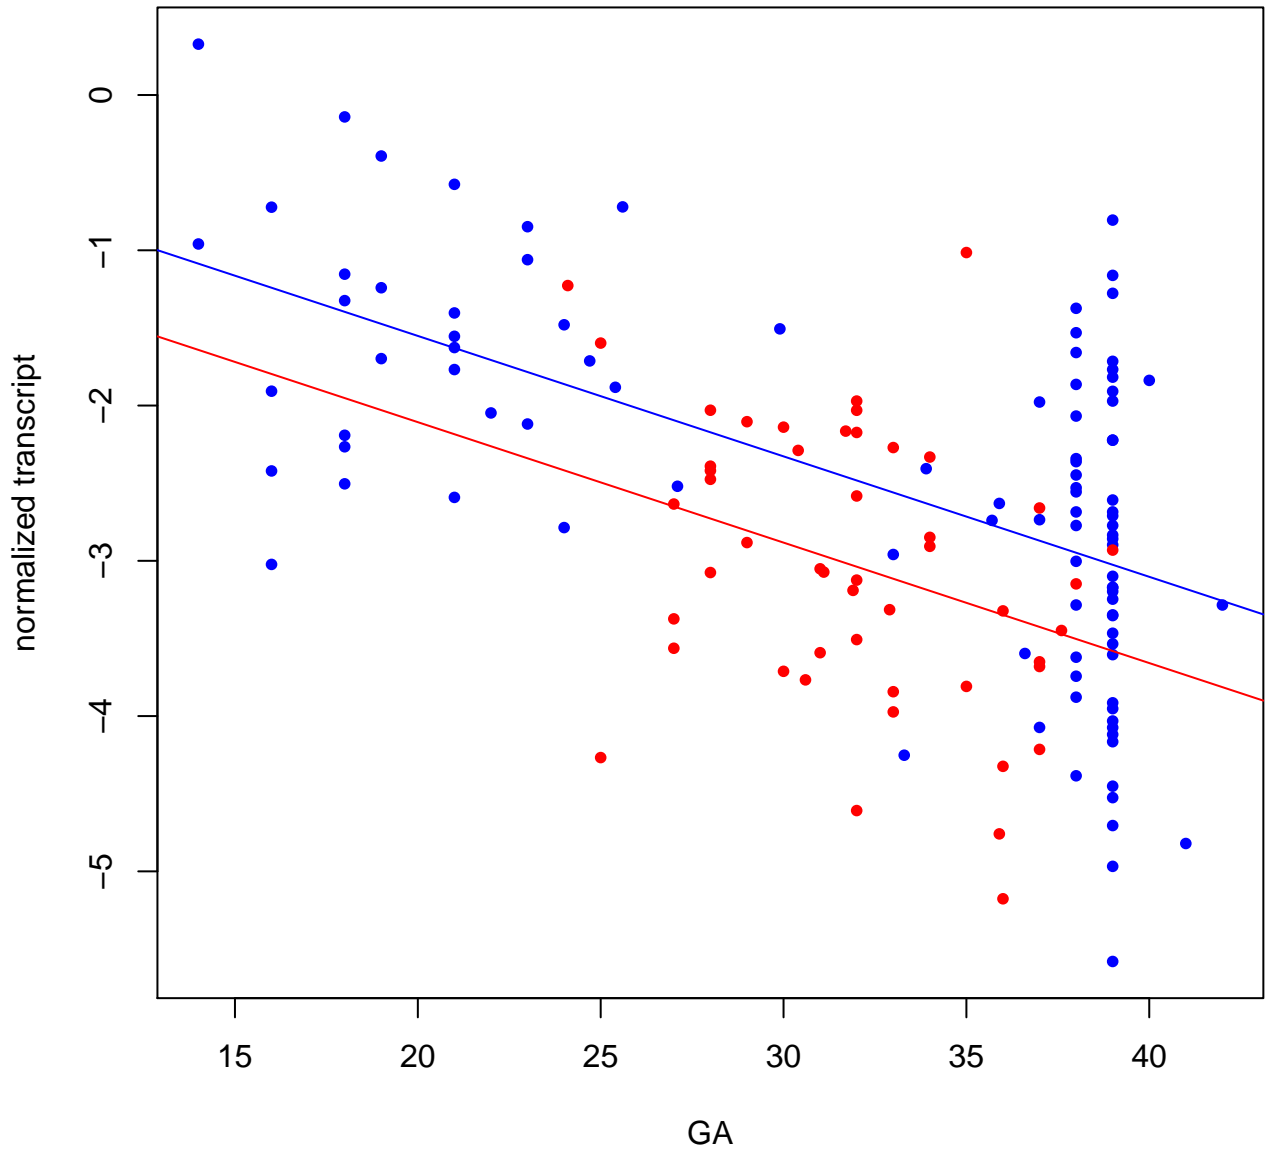



# 221729\_at

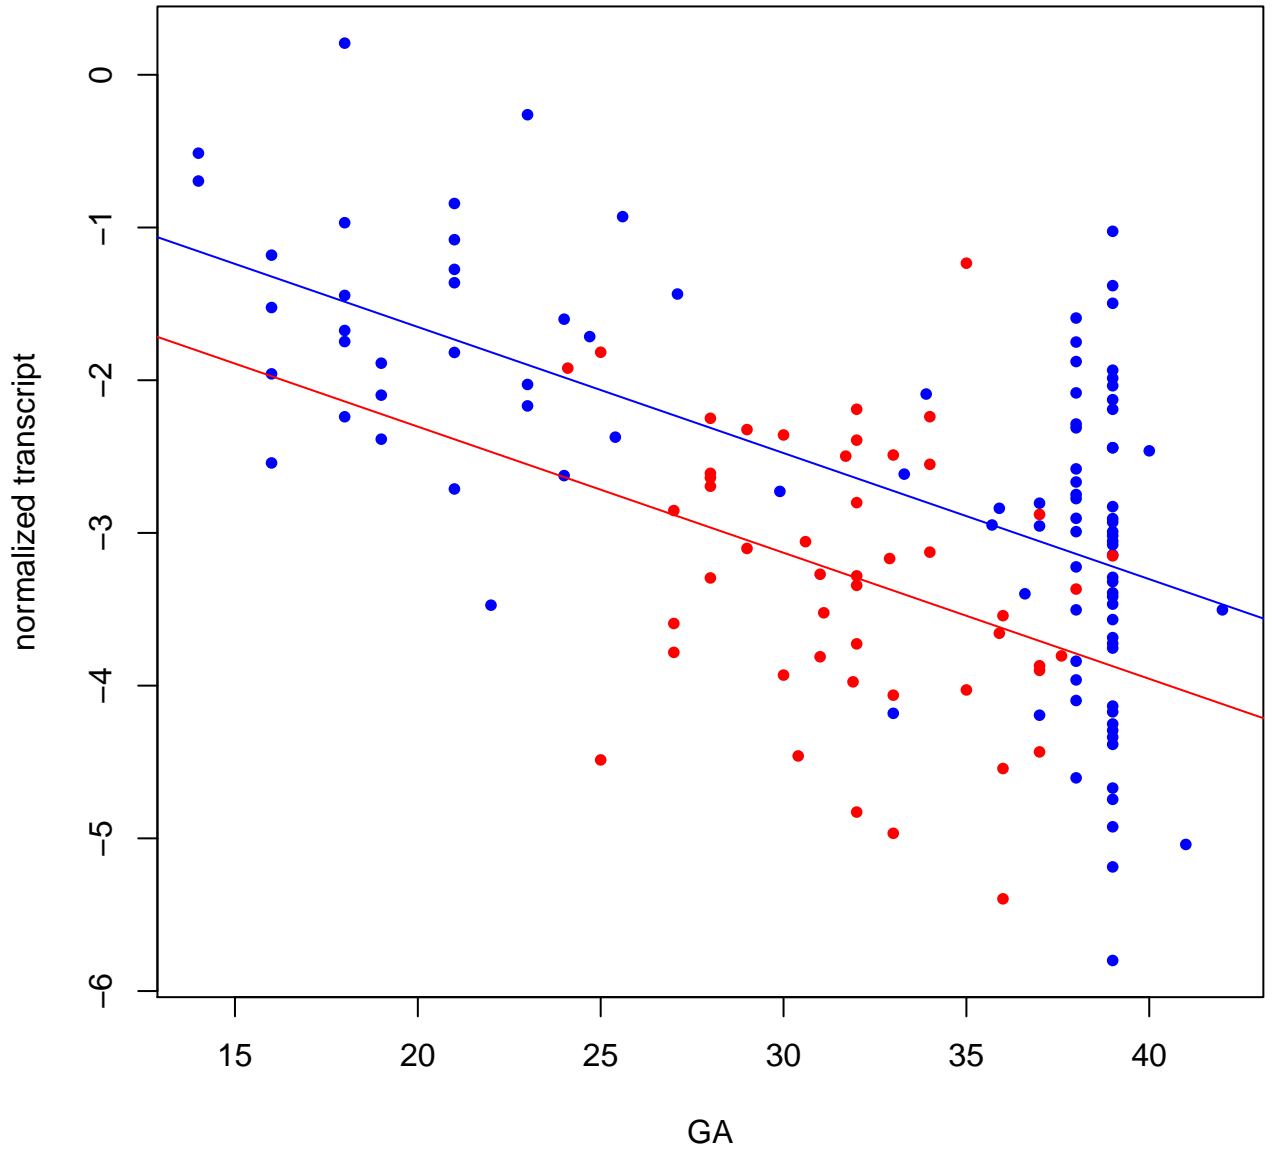

# 201852\_x\_at

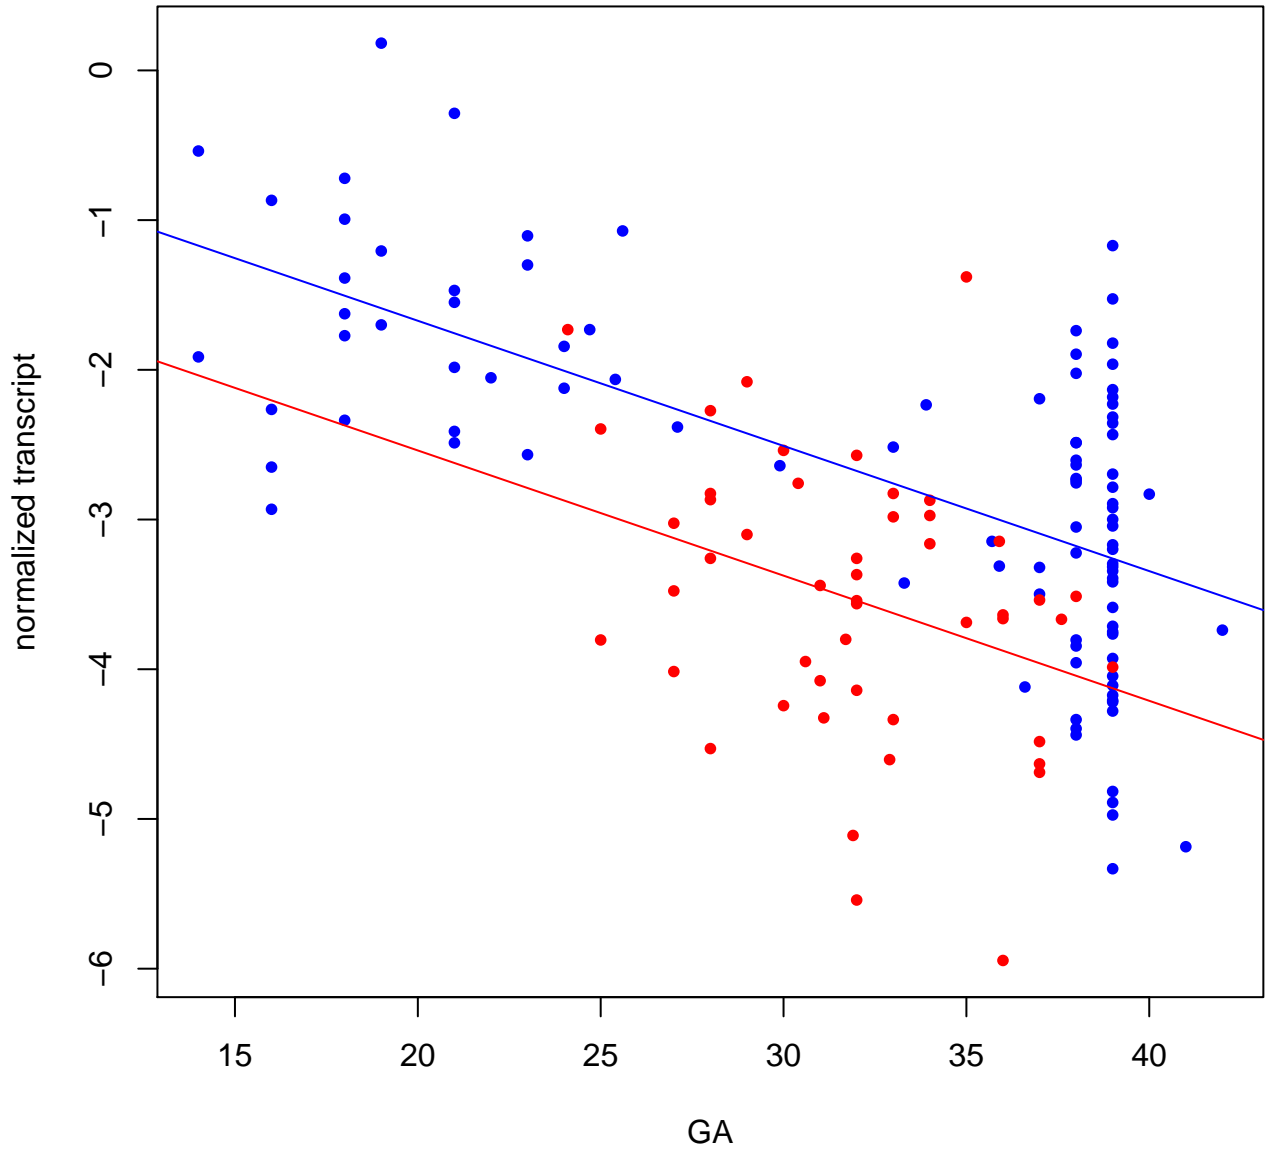



# 211161\_s\_at

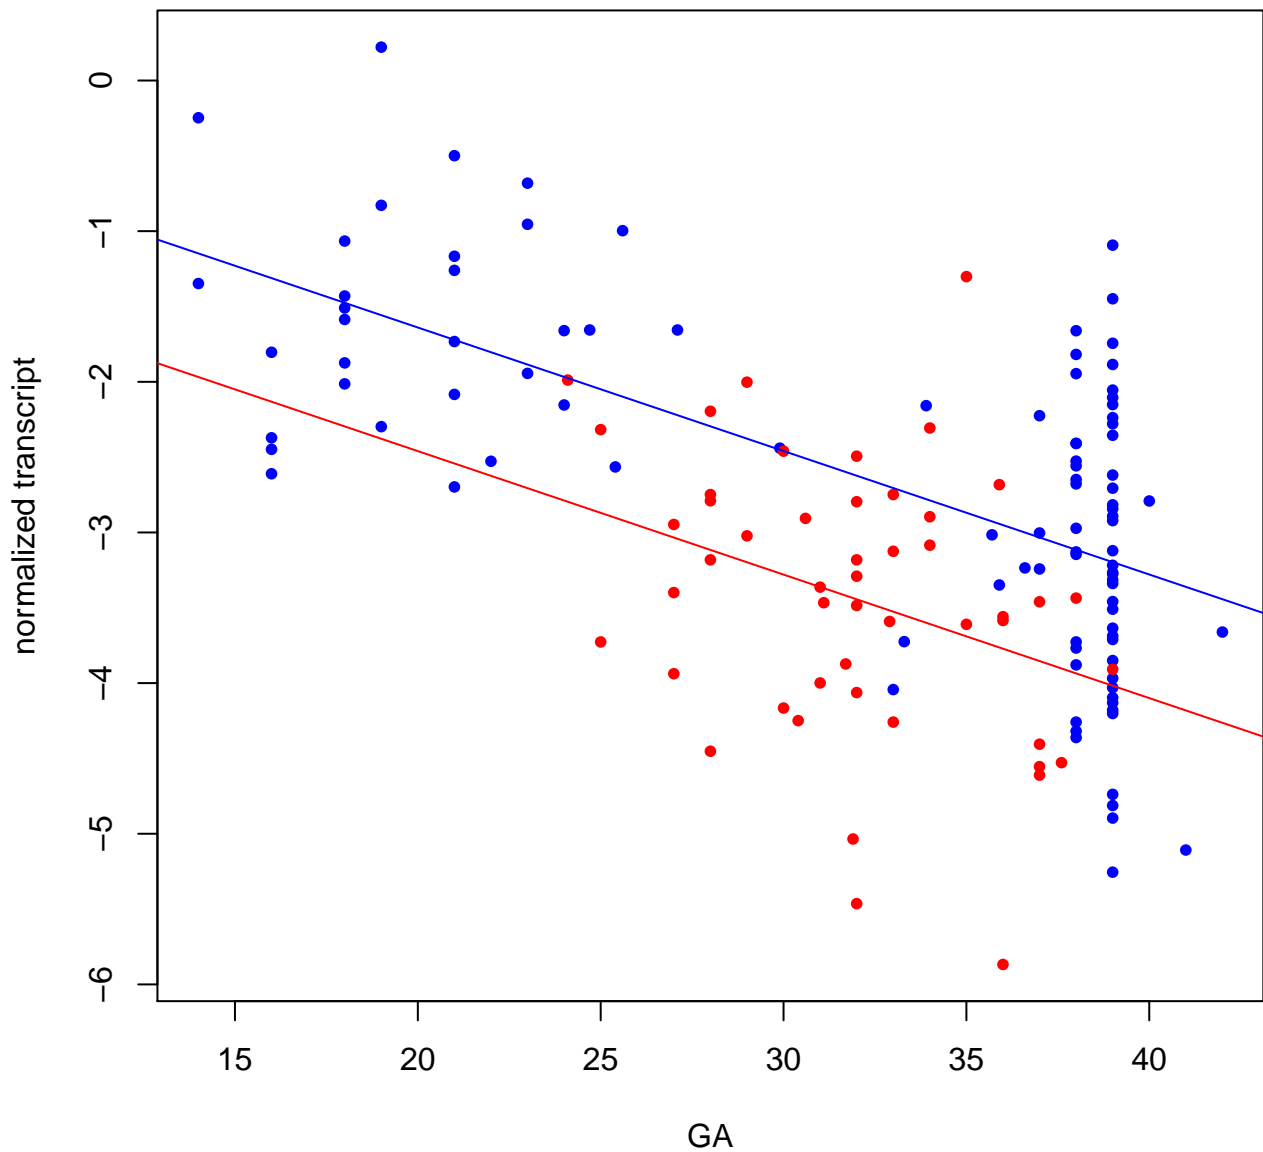

# 219293\_s\_at

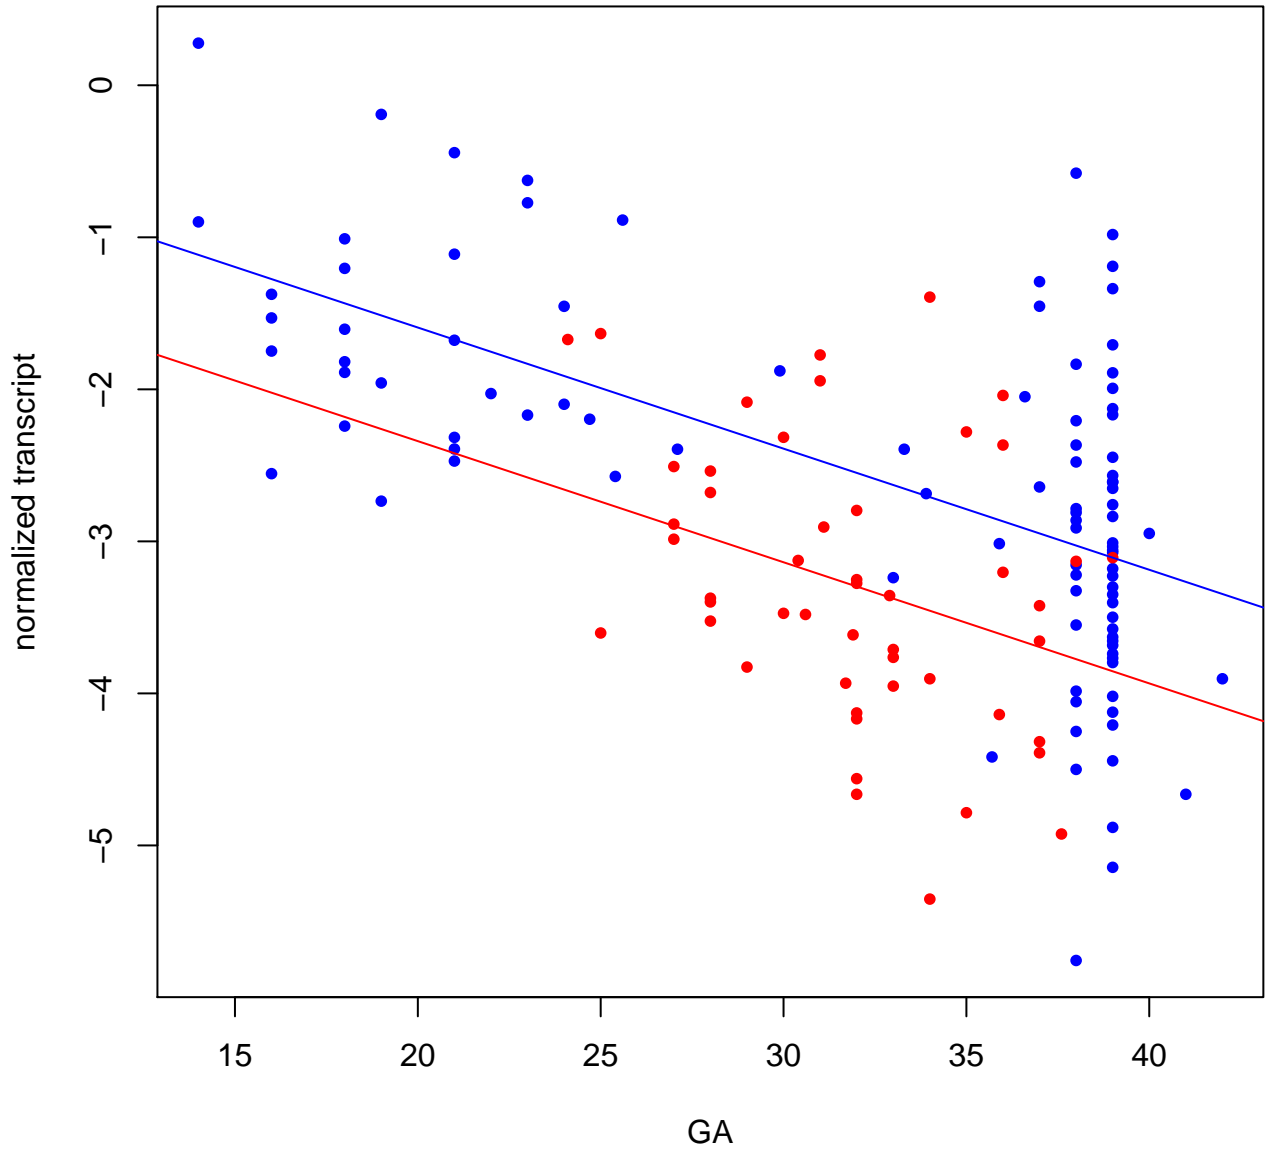

# 218162\_at

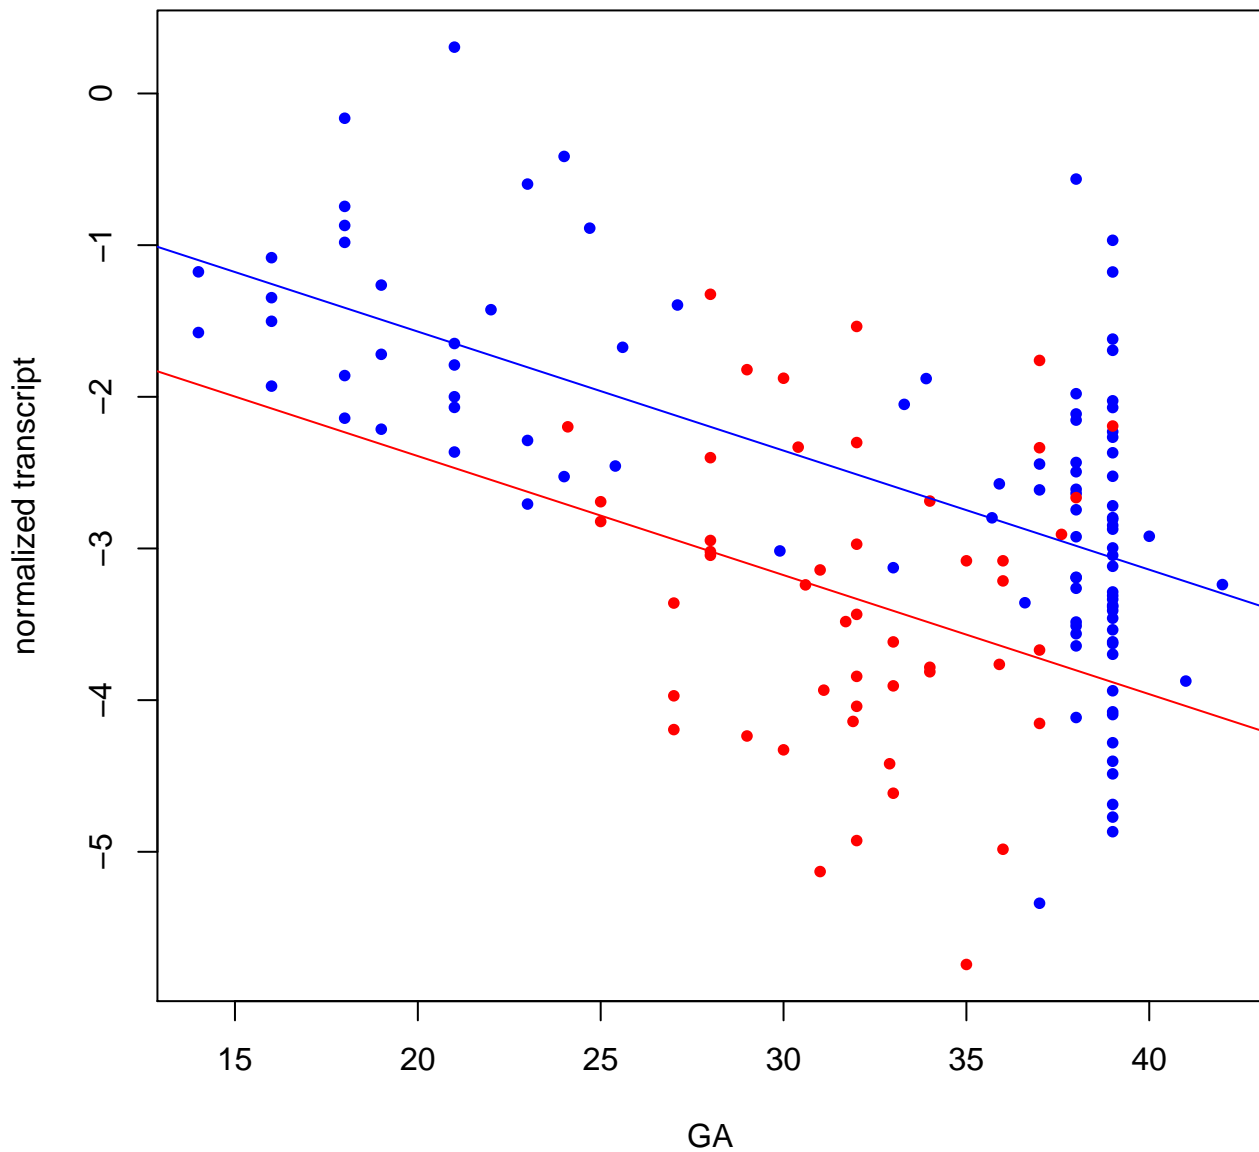

# 203397\_s\_at

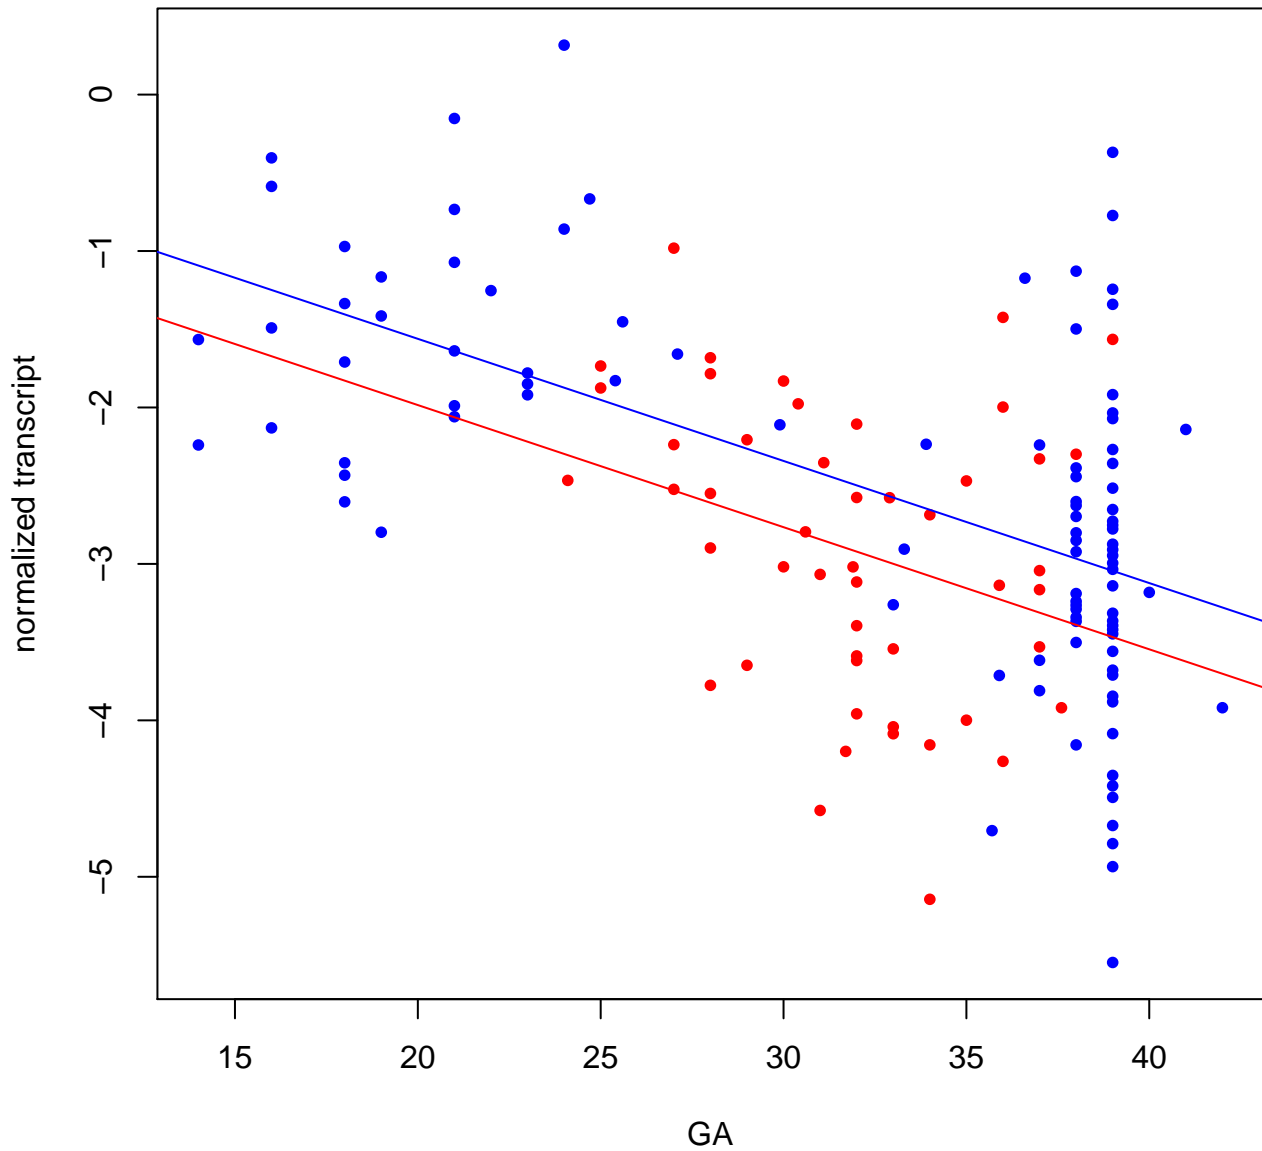





# 215017\_s\_at

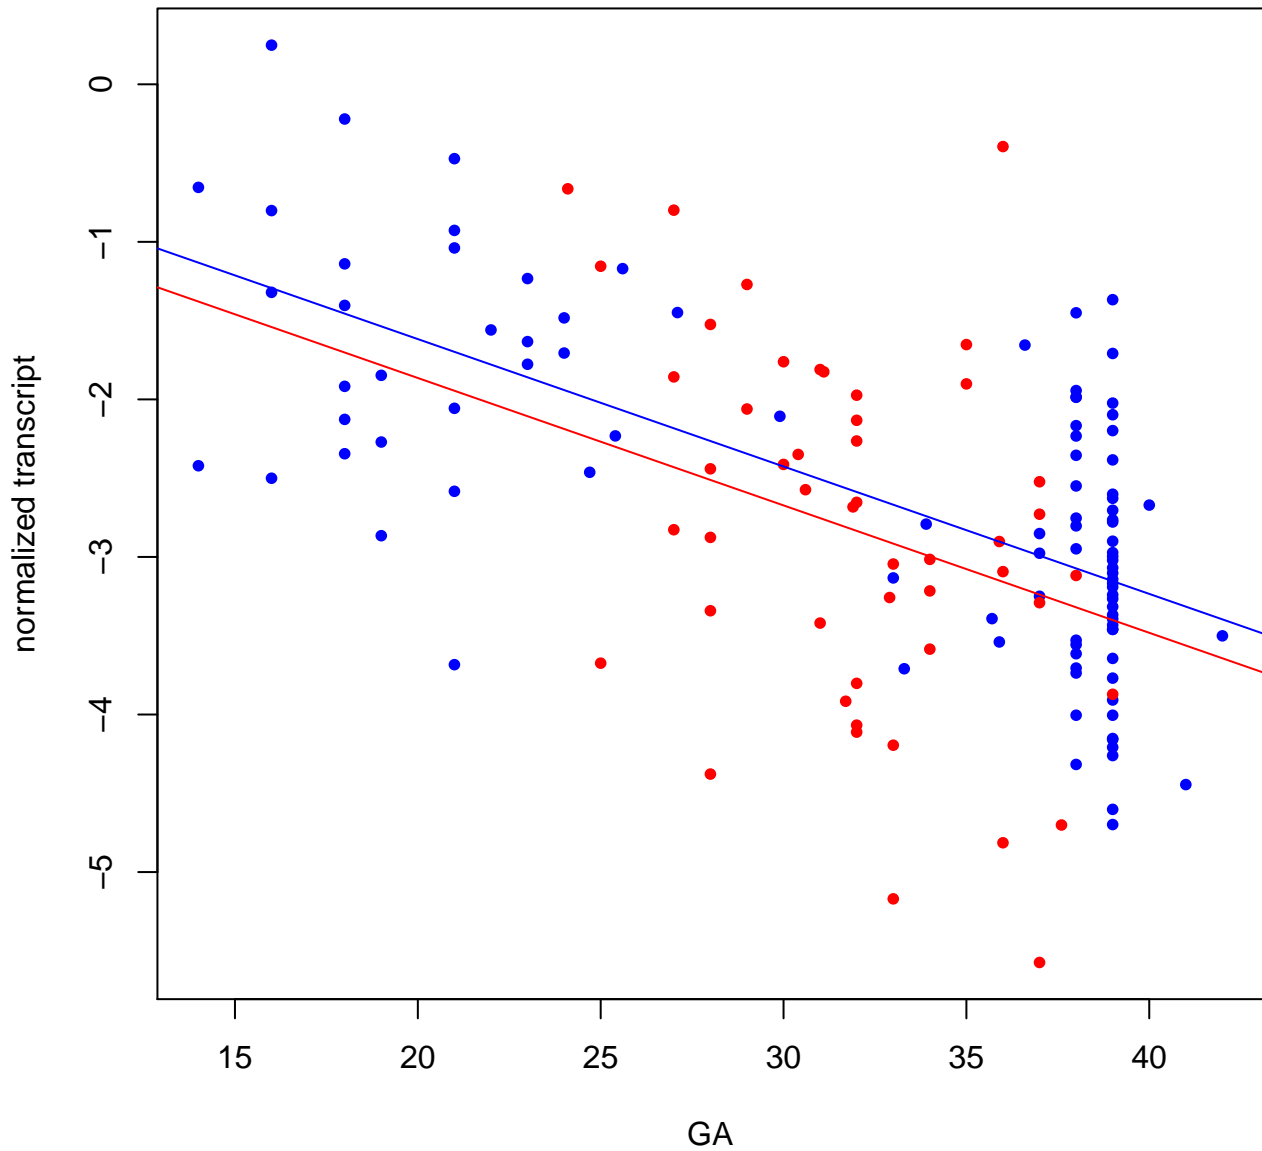

# 212160\_at

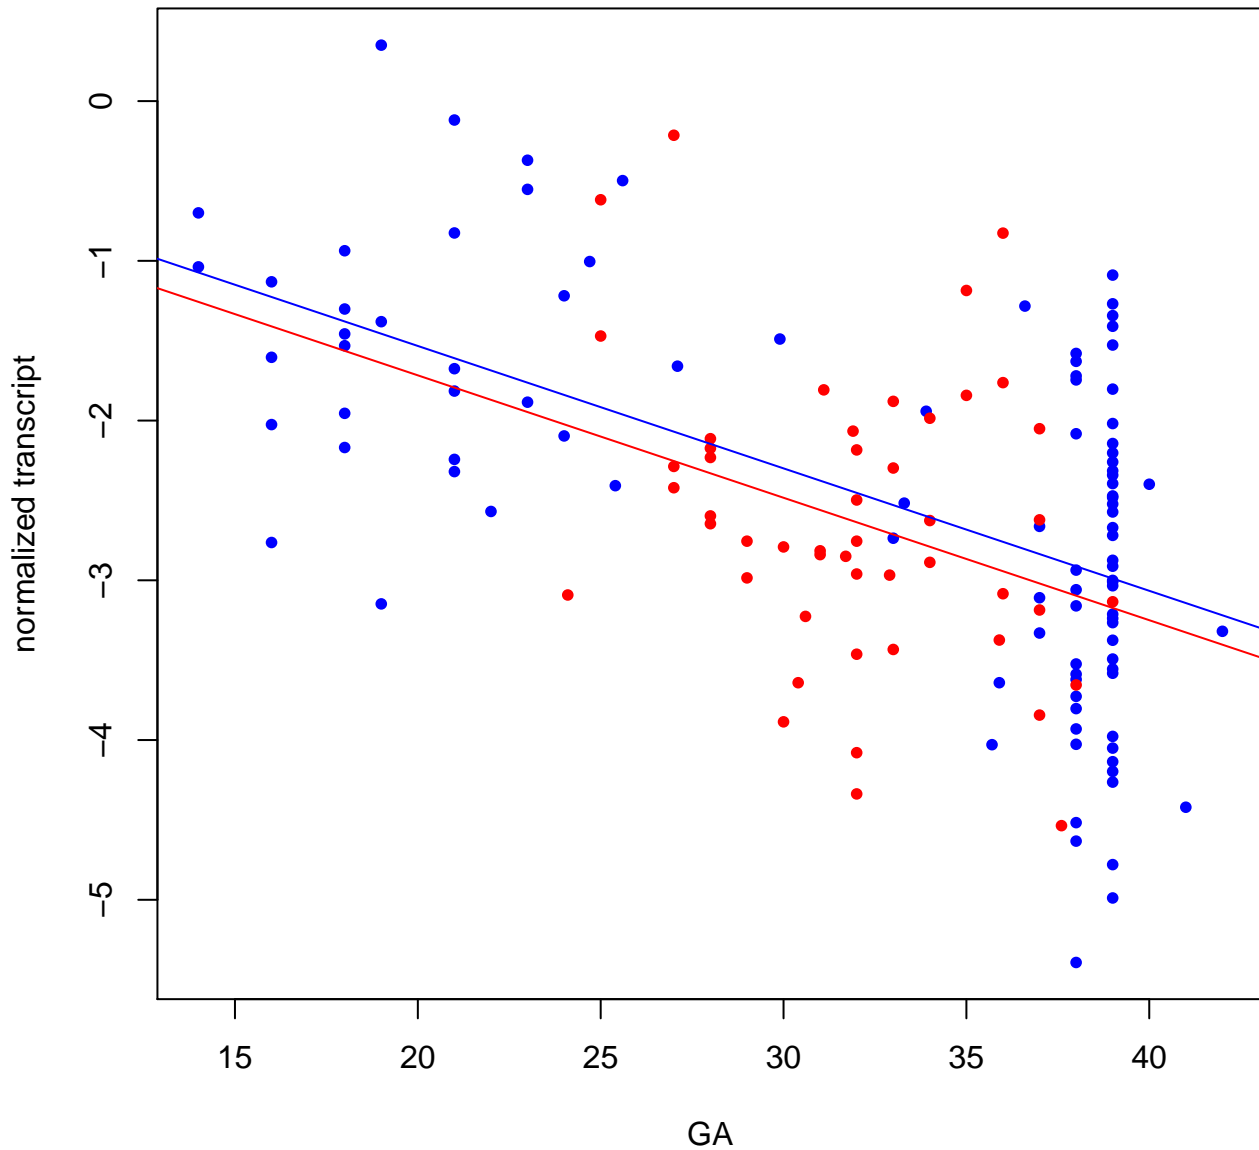

# 209357\_at

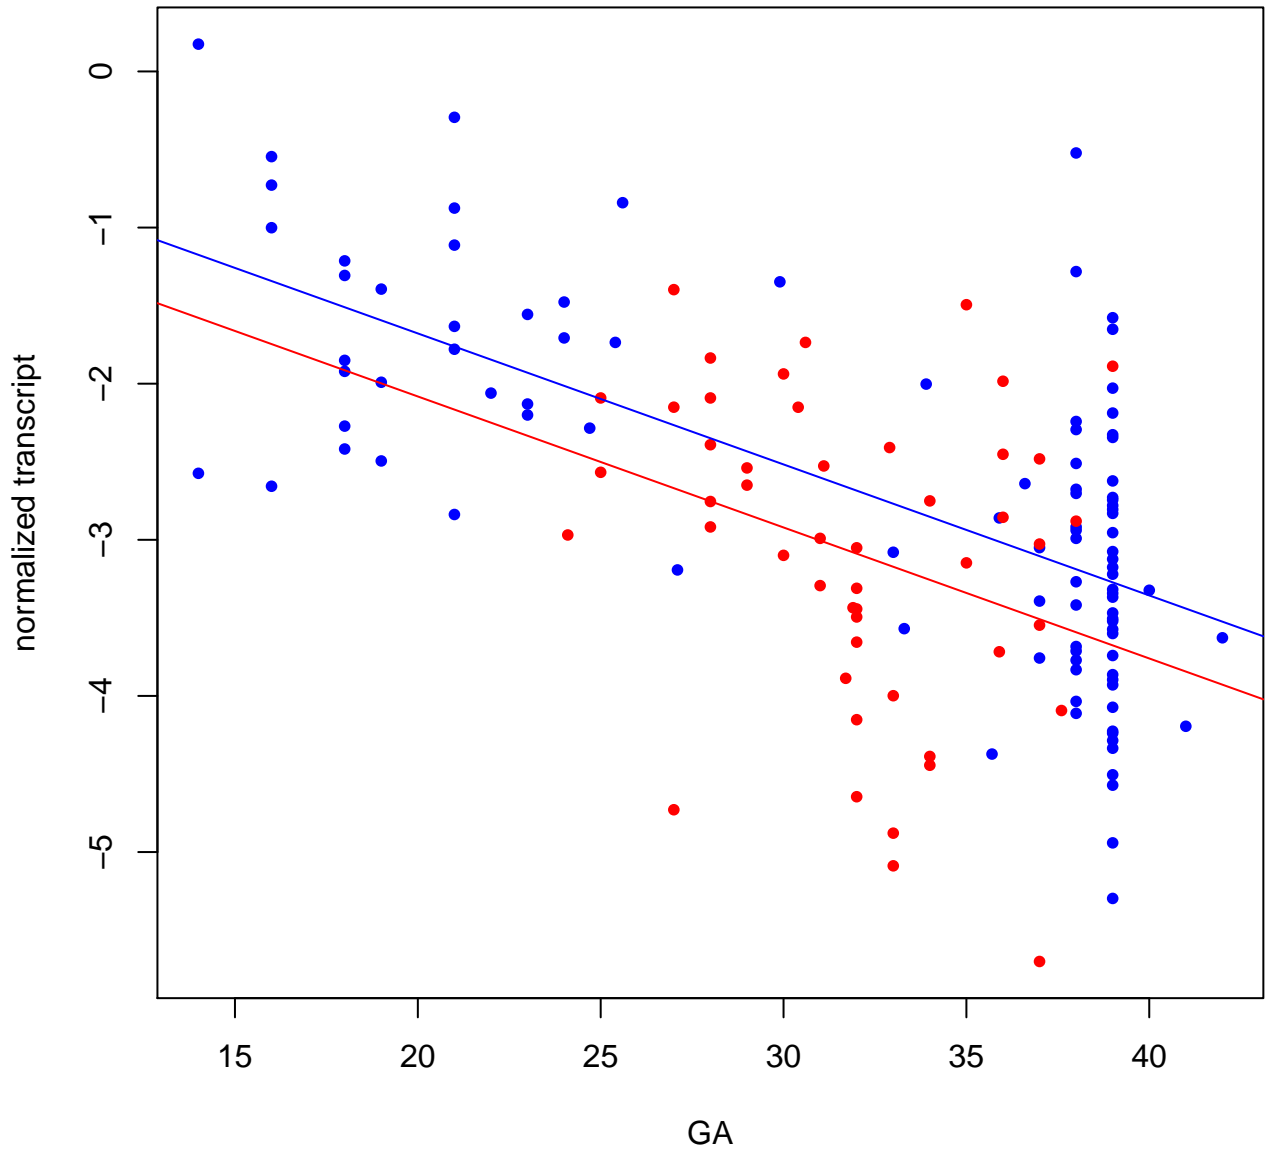

# 217870\_s\_at

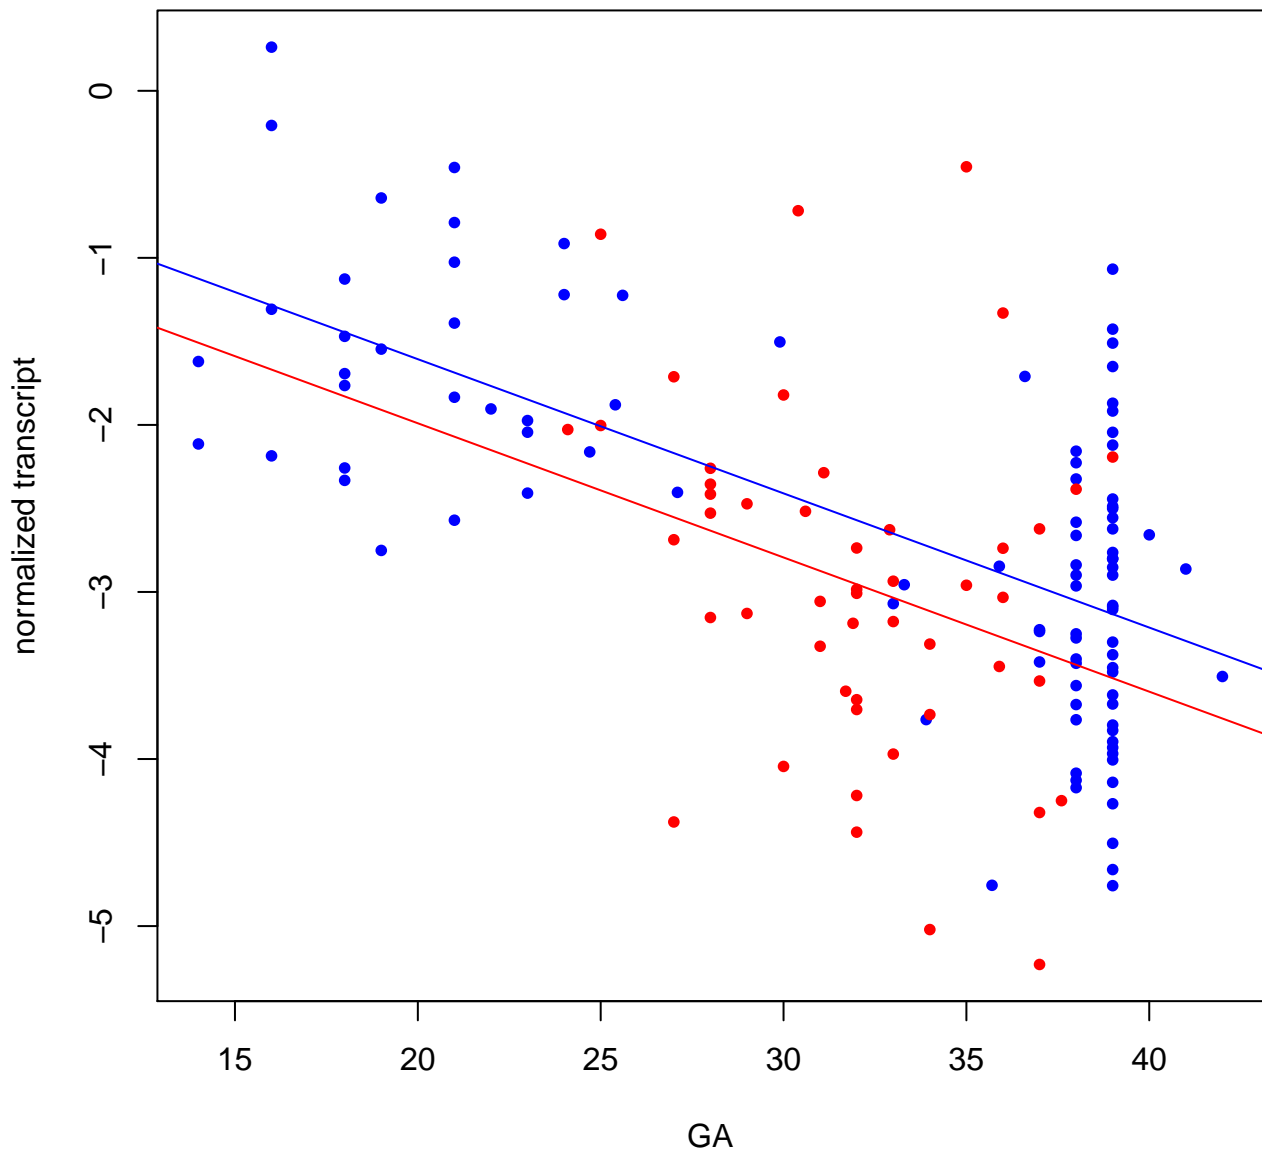

# 201667\_at

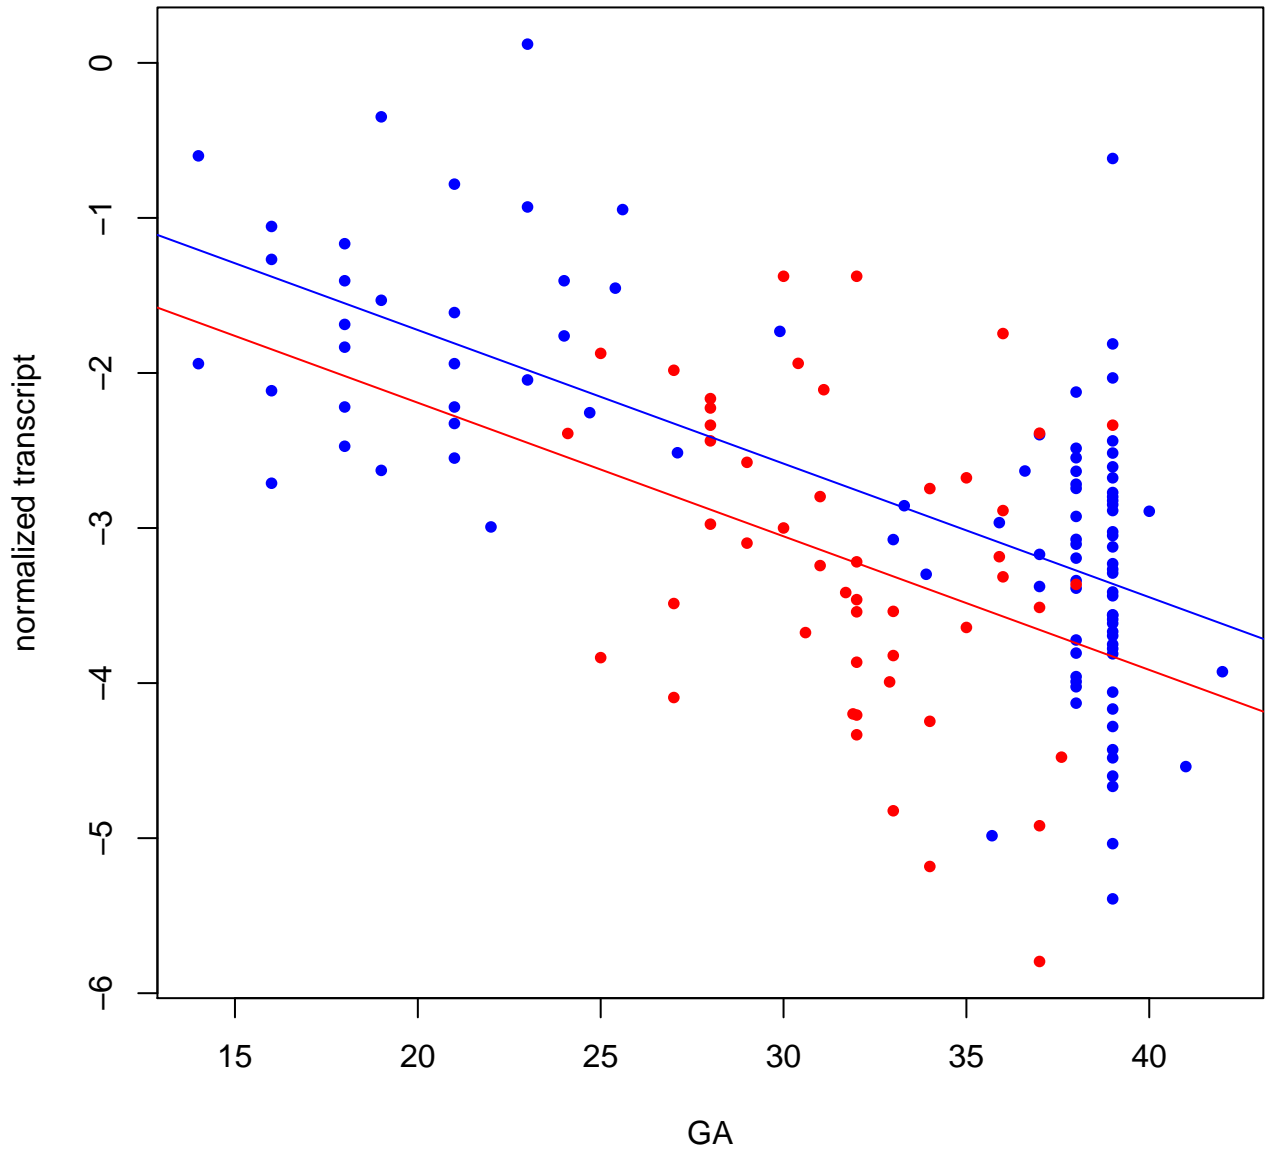

# 221760\_at

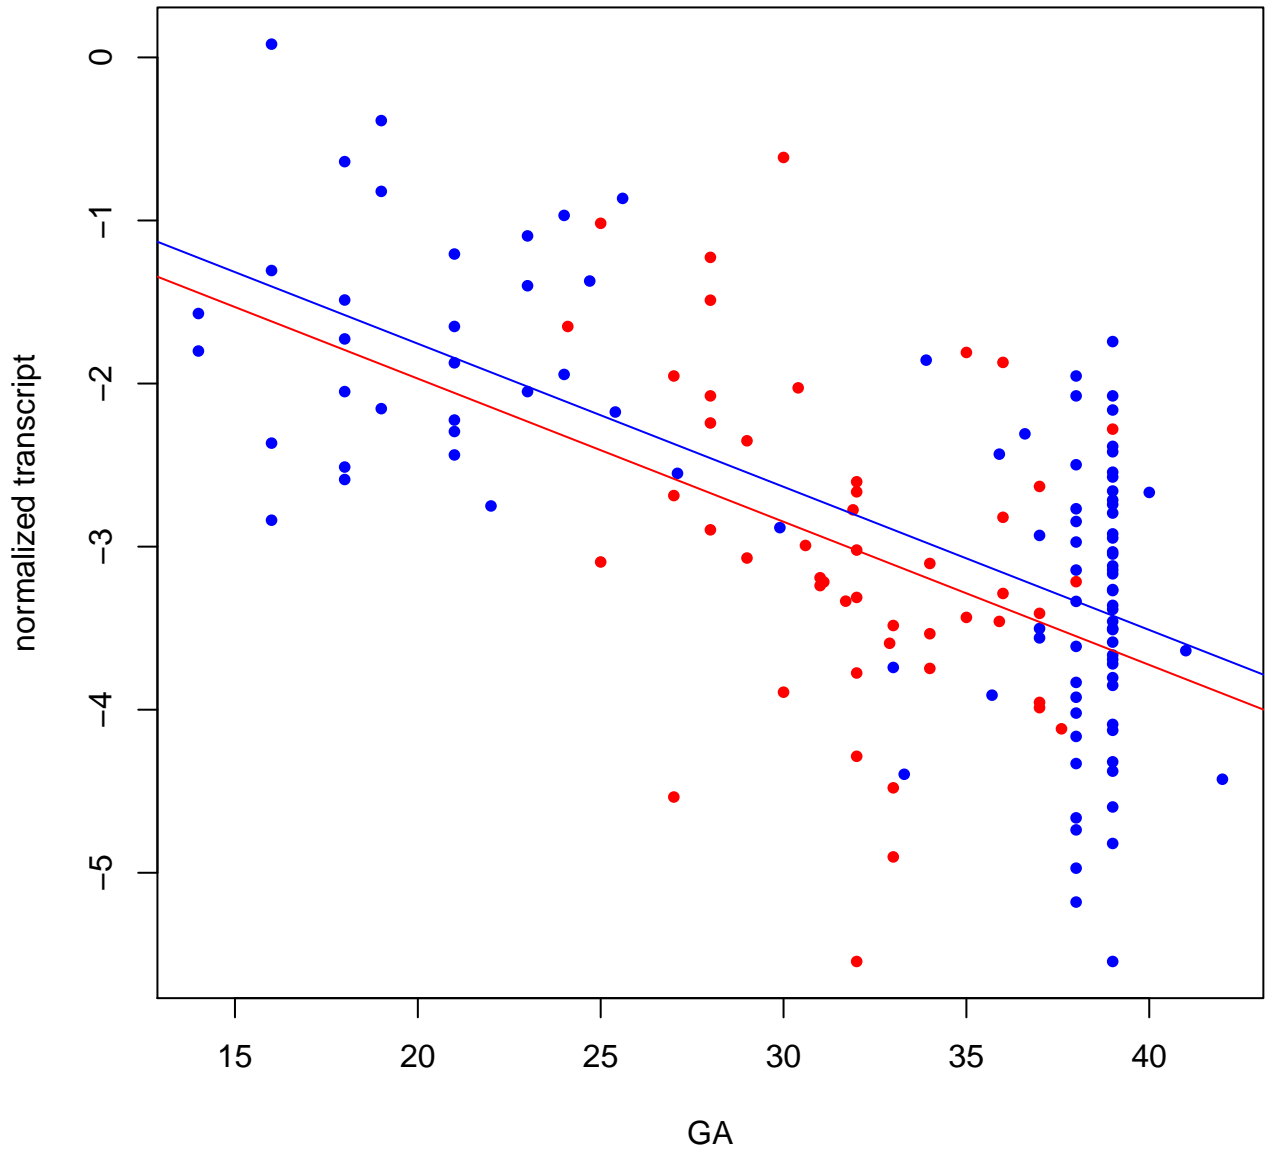

# 209583\_s\_at.1

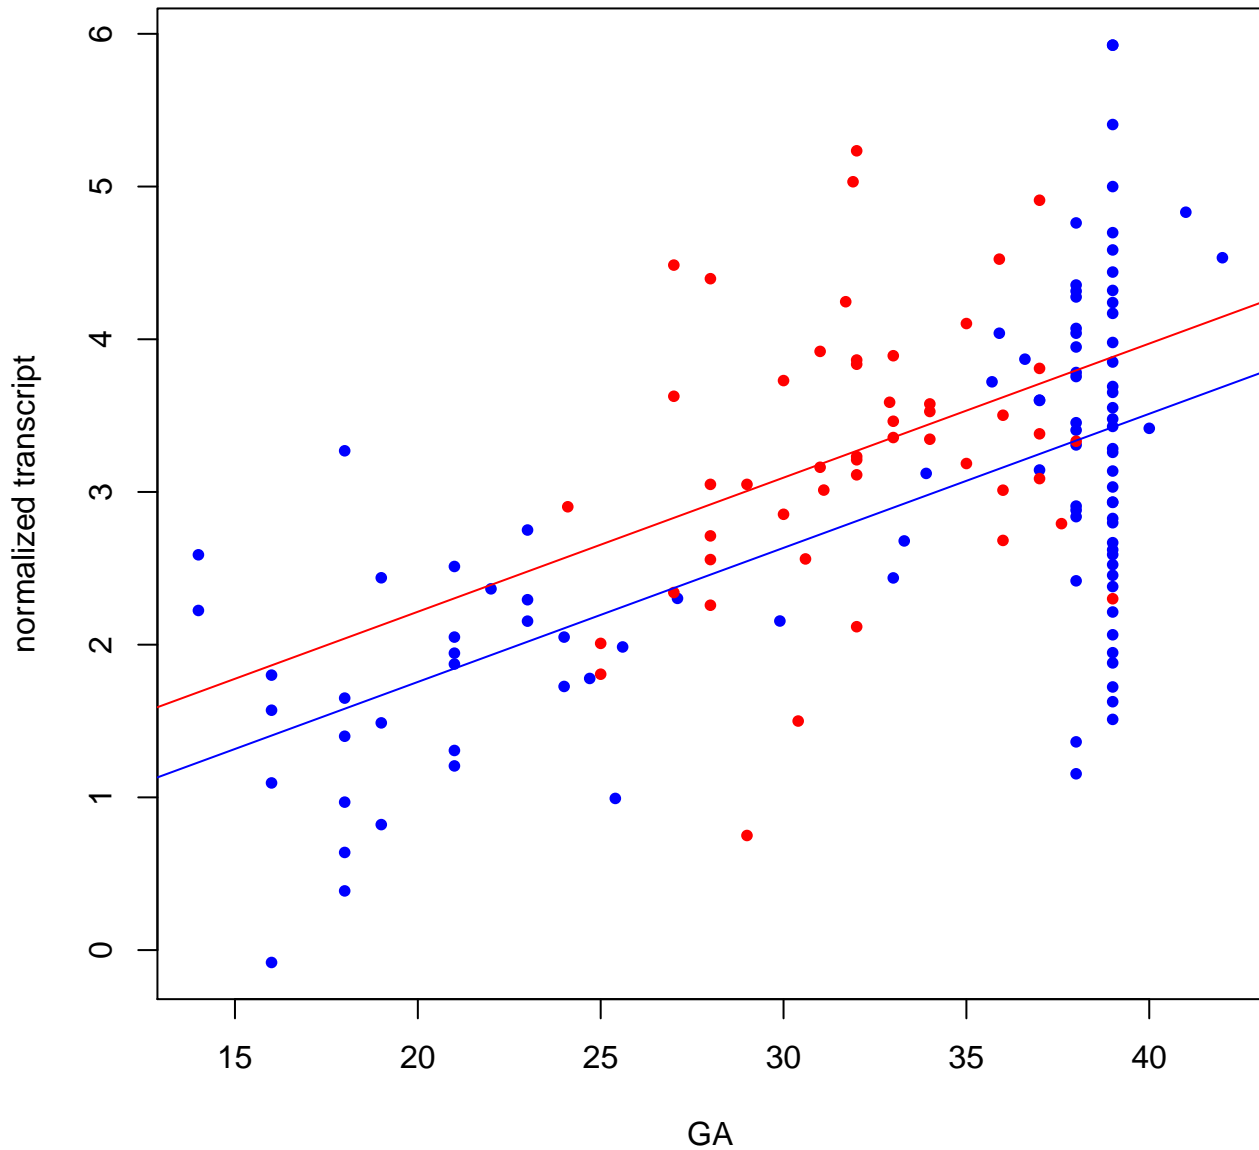

# 209582\_s\_at.1

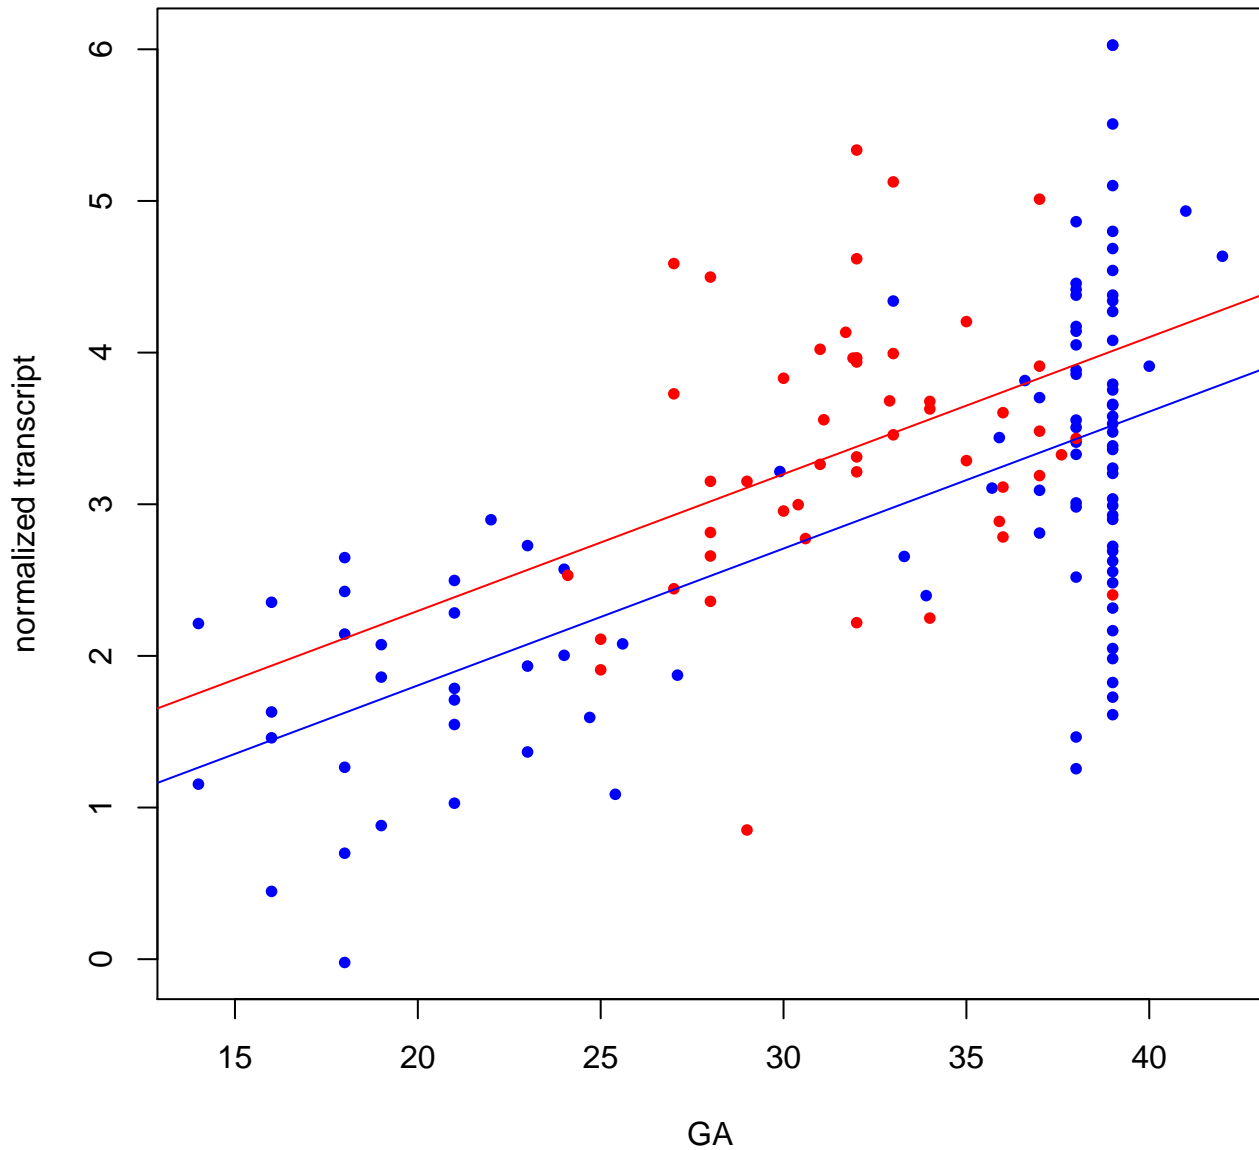



# 201599\_at

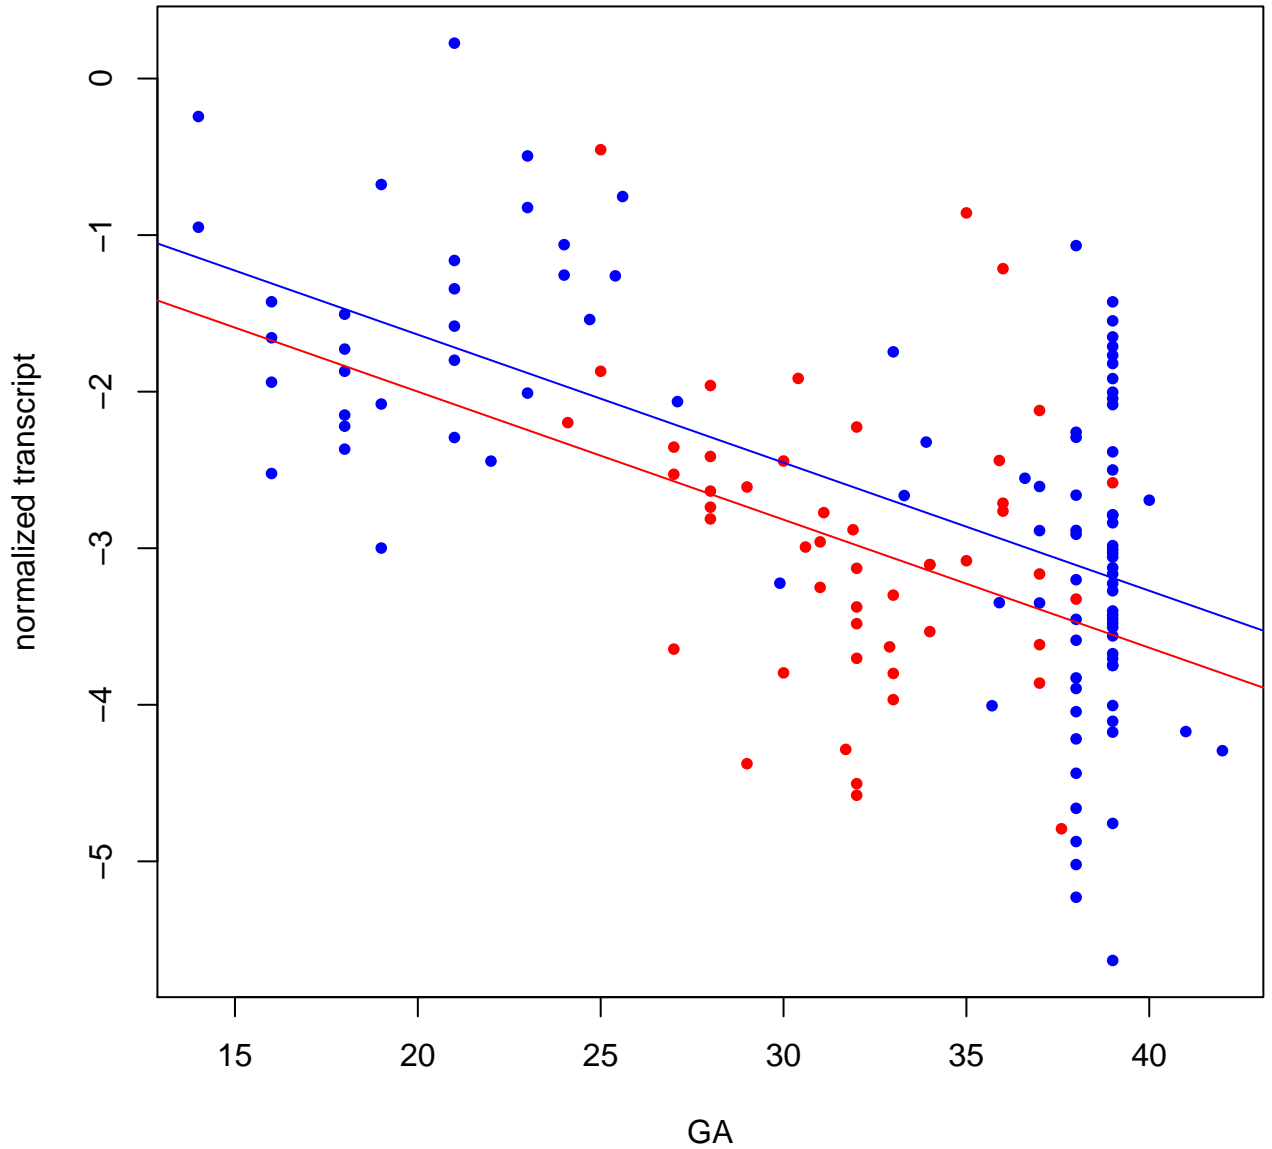



# 213194\_at

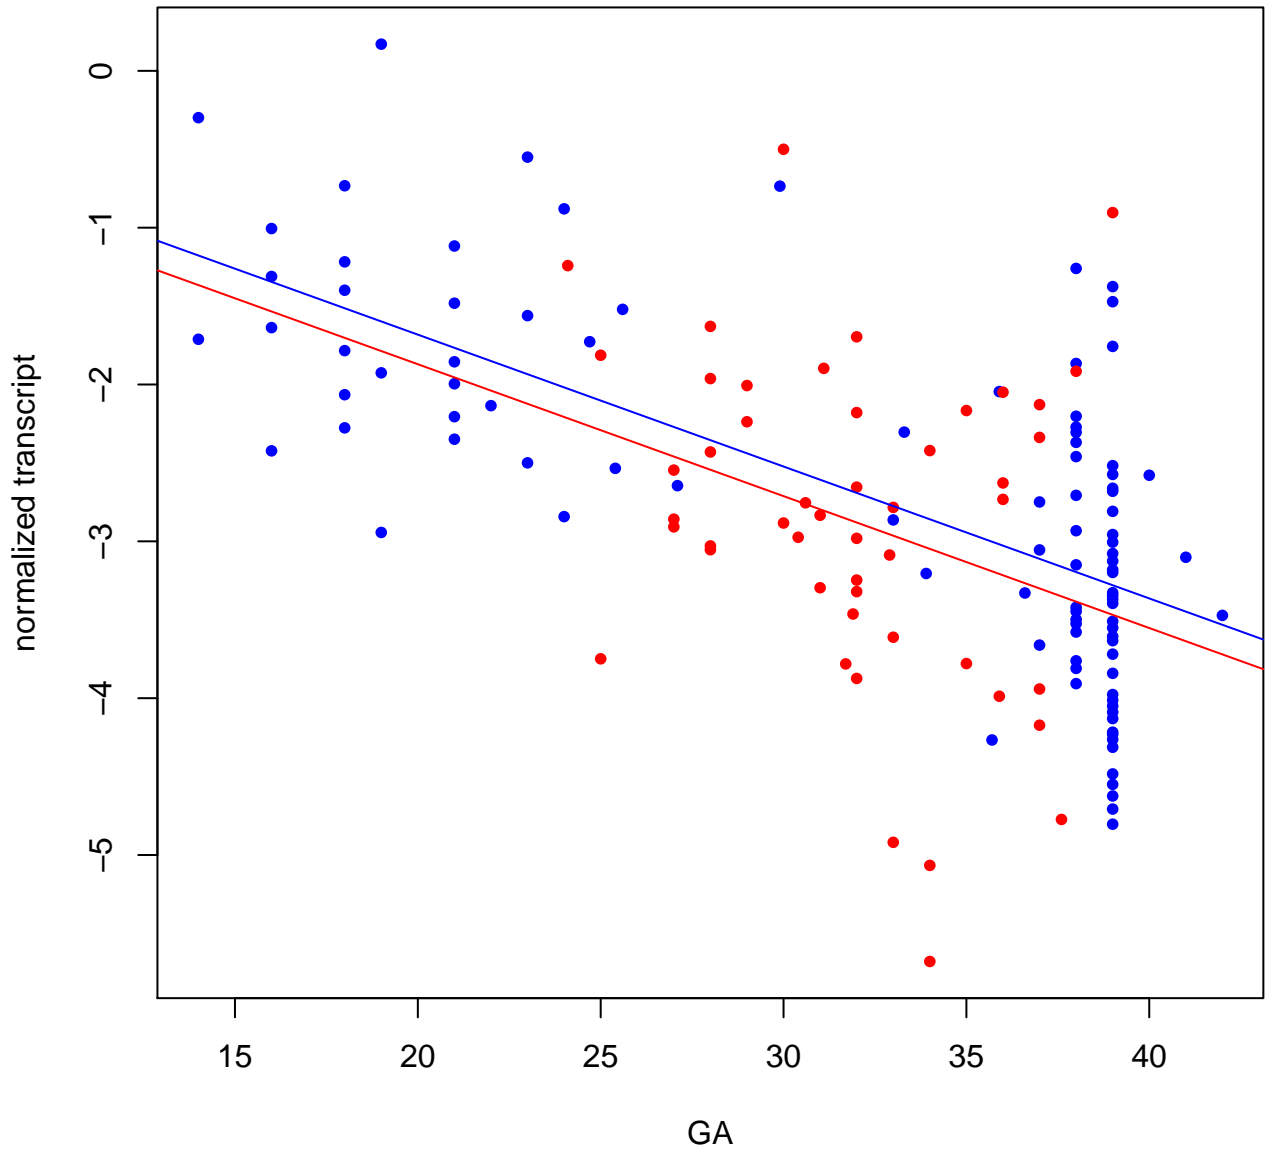

# 212489\_at

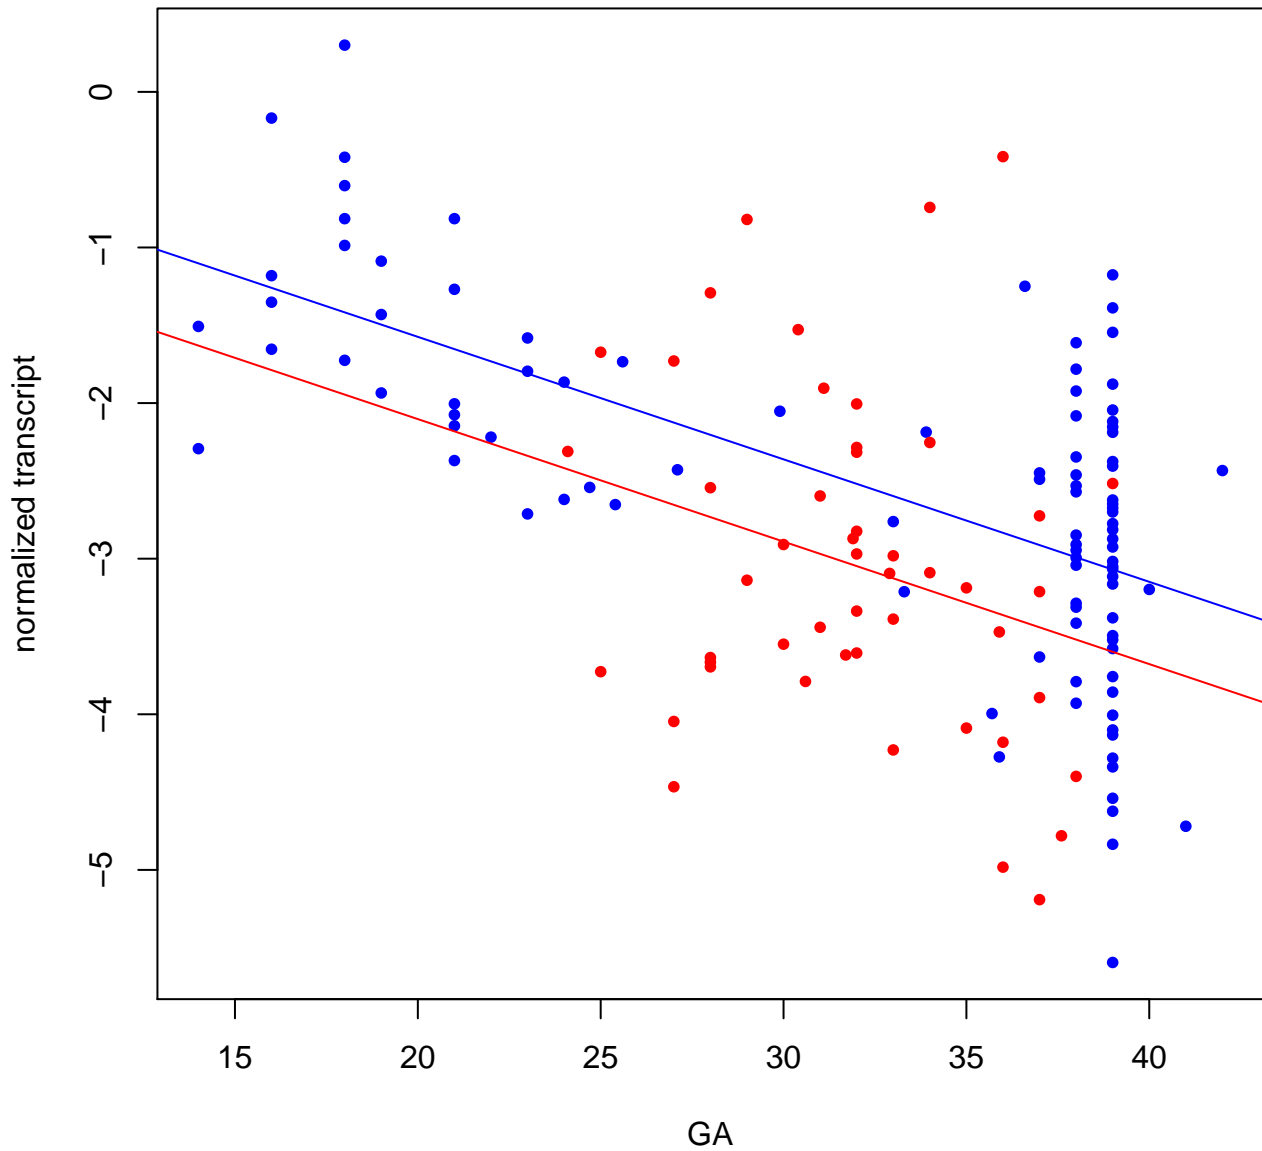

# 212915\_at

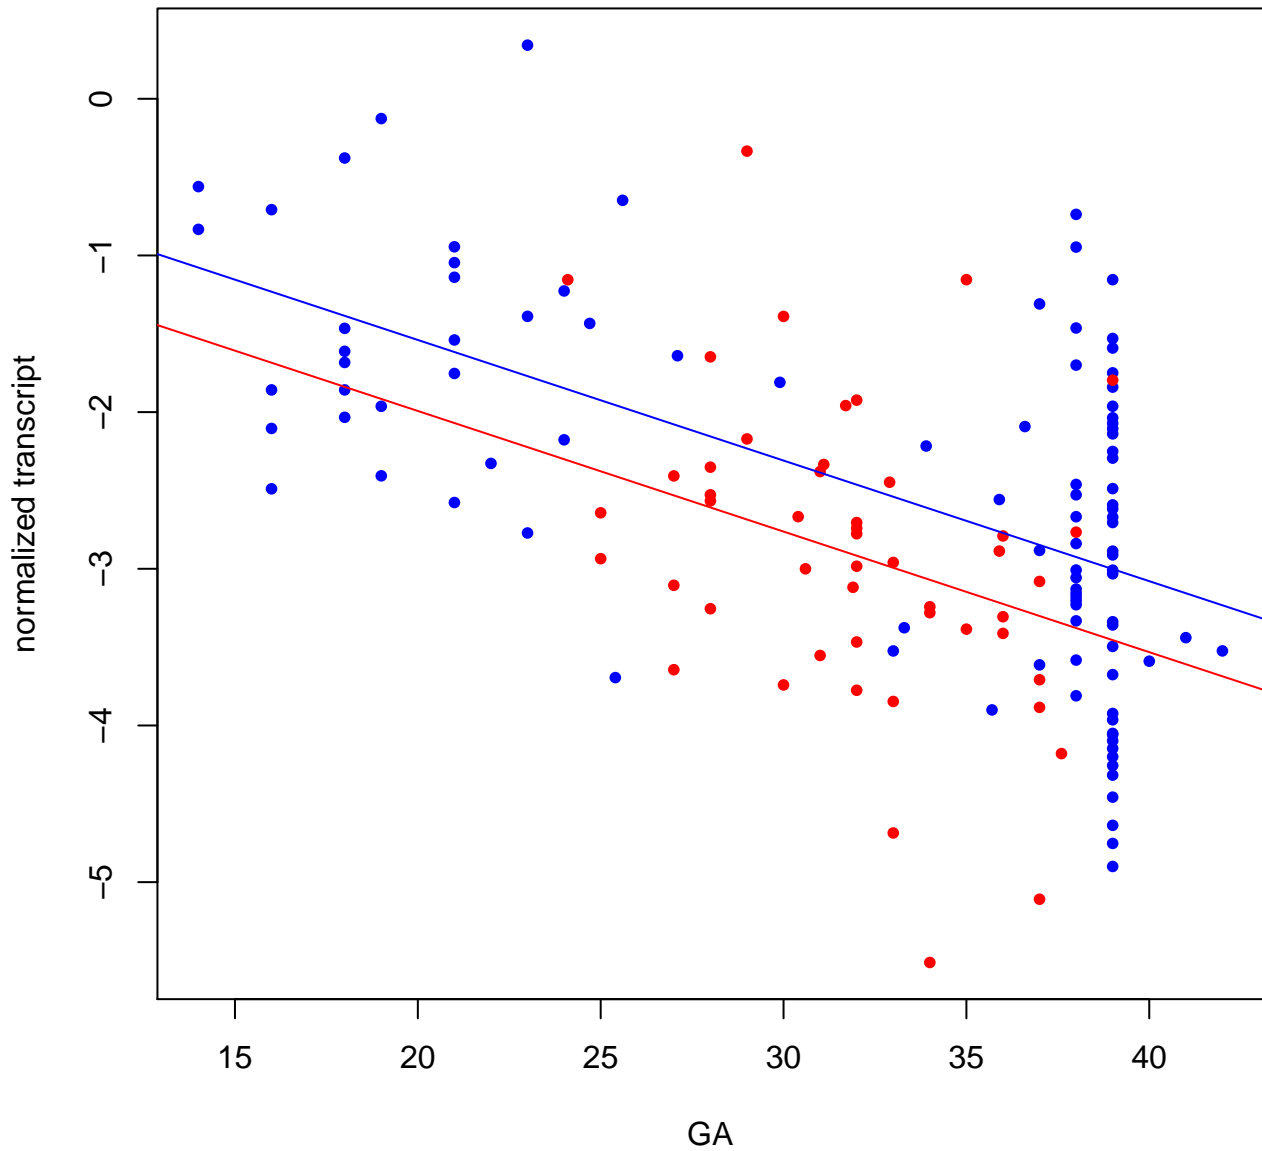

# 212915\_at.1

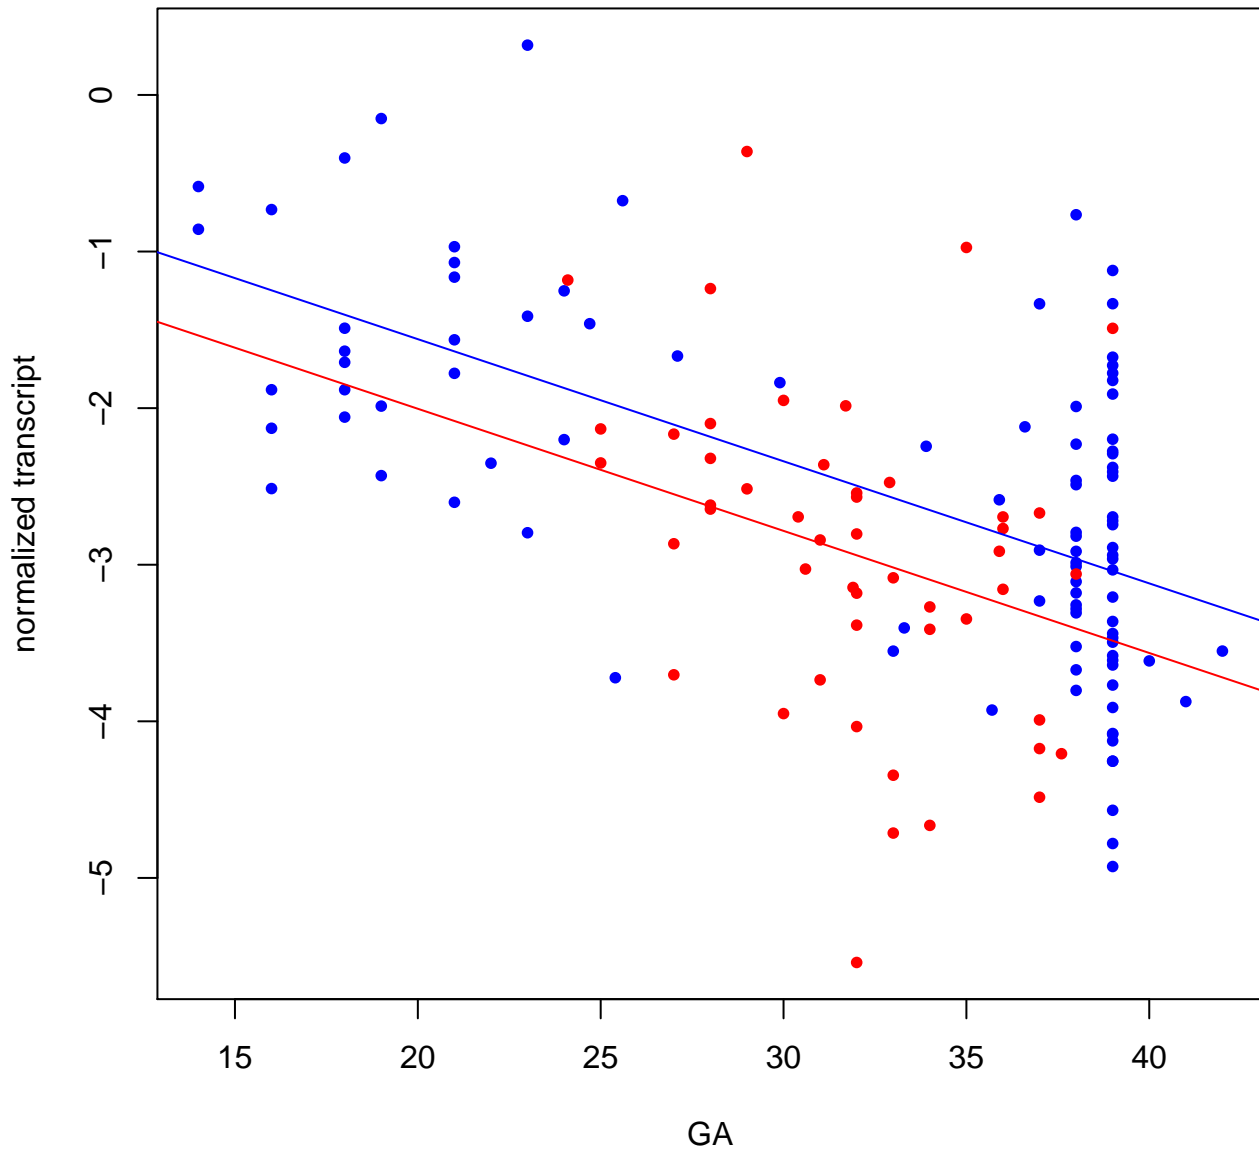

# 216035\_x\_at

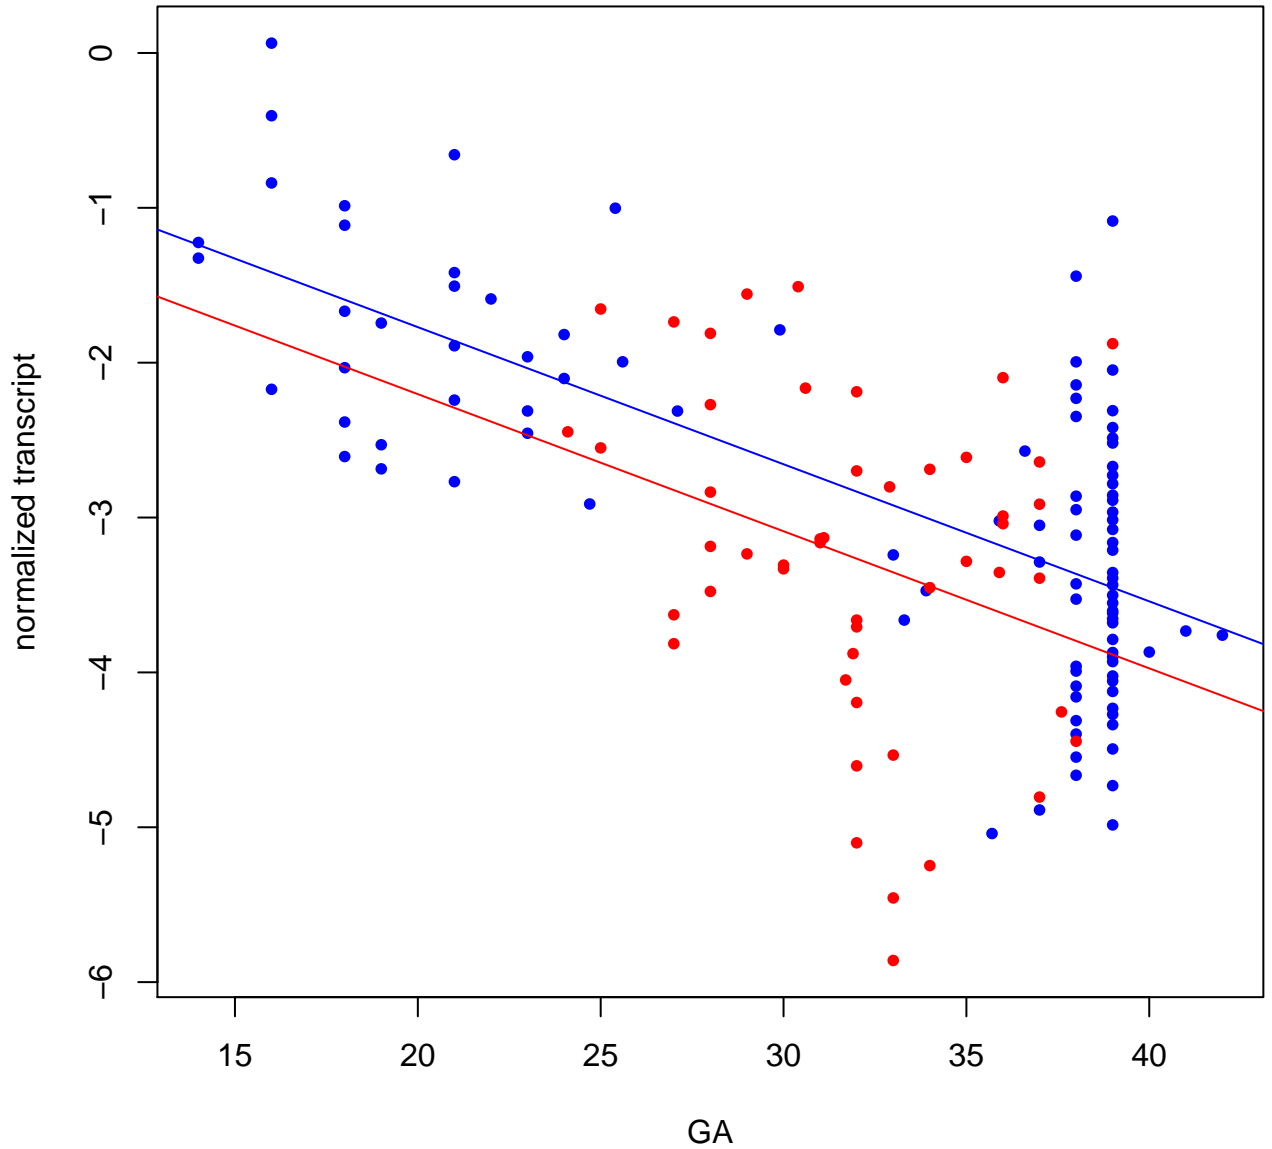

# 212761\_at

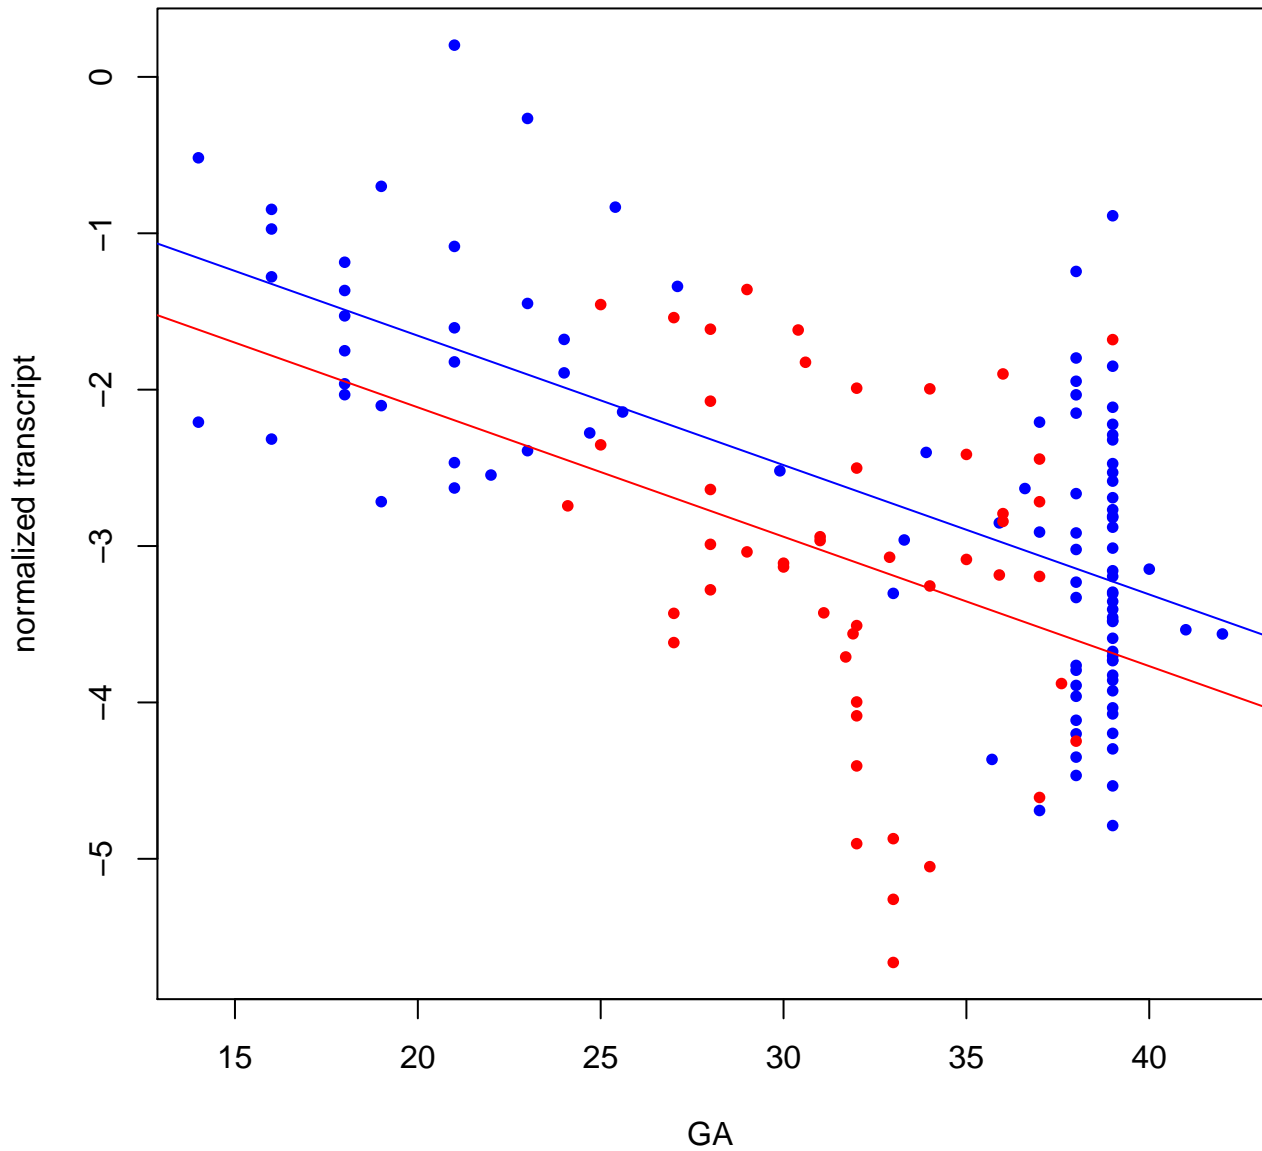





# 212762\_s\_at

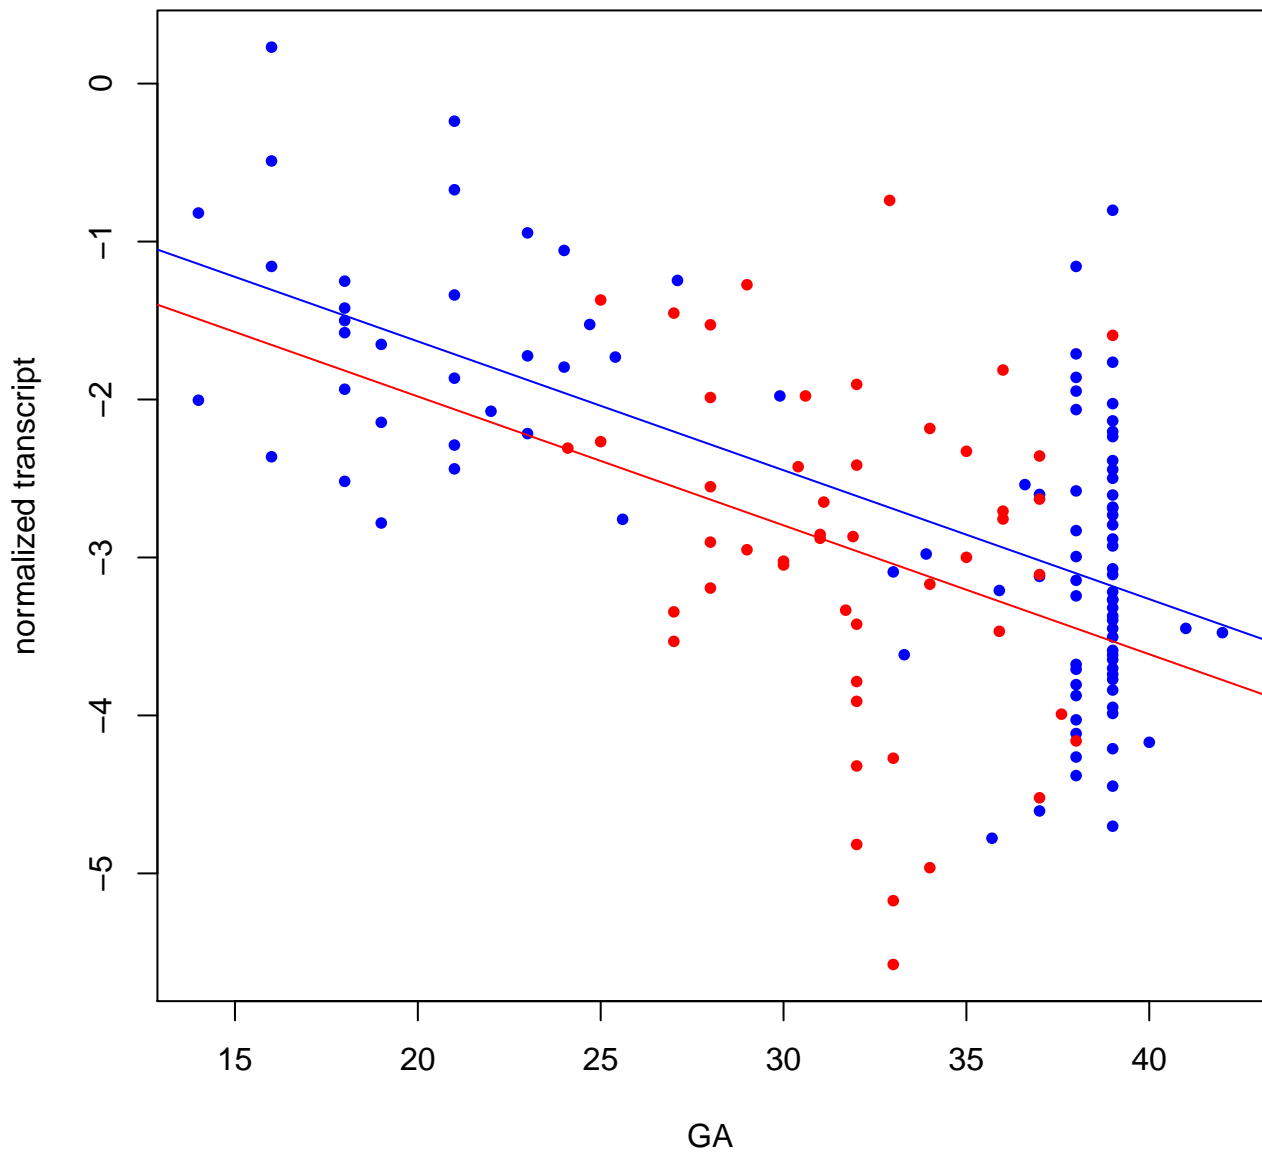

# 212759\_s\_at

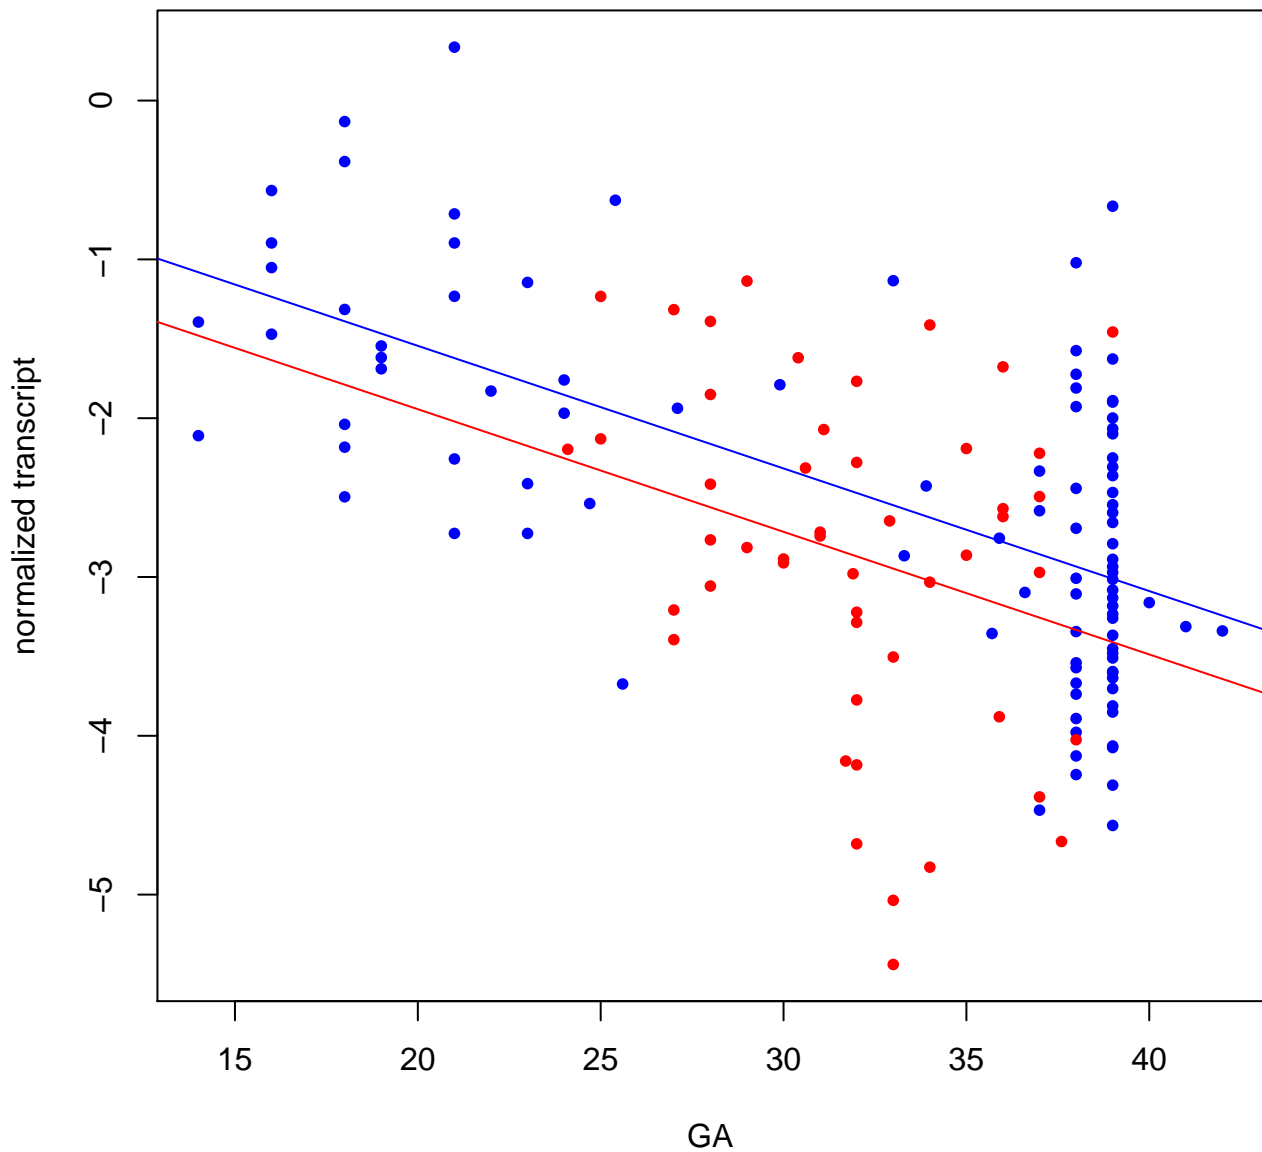

# 207076\_s\_at.1

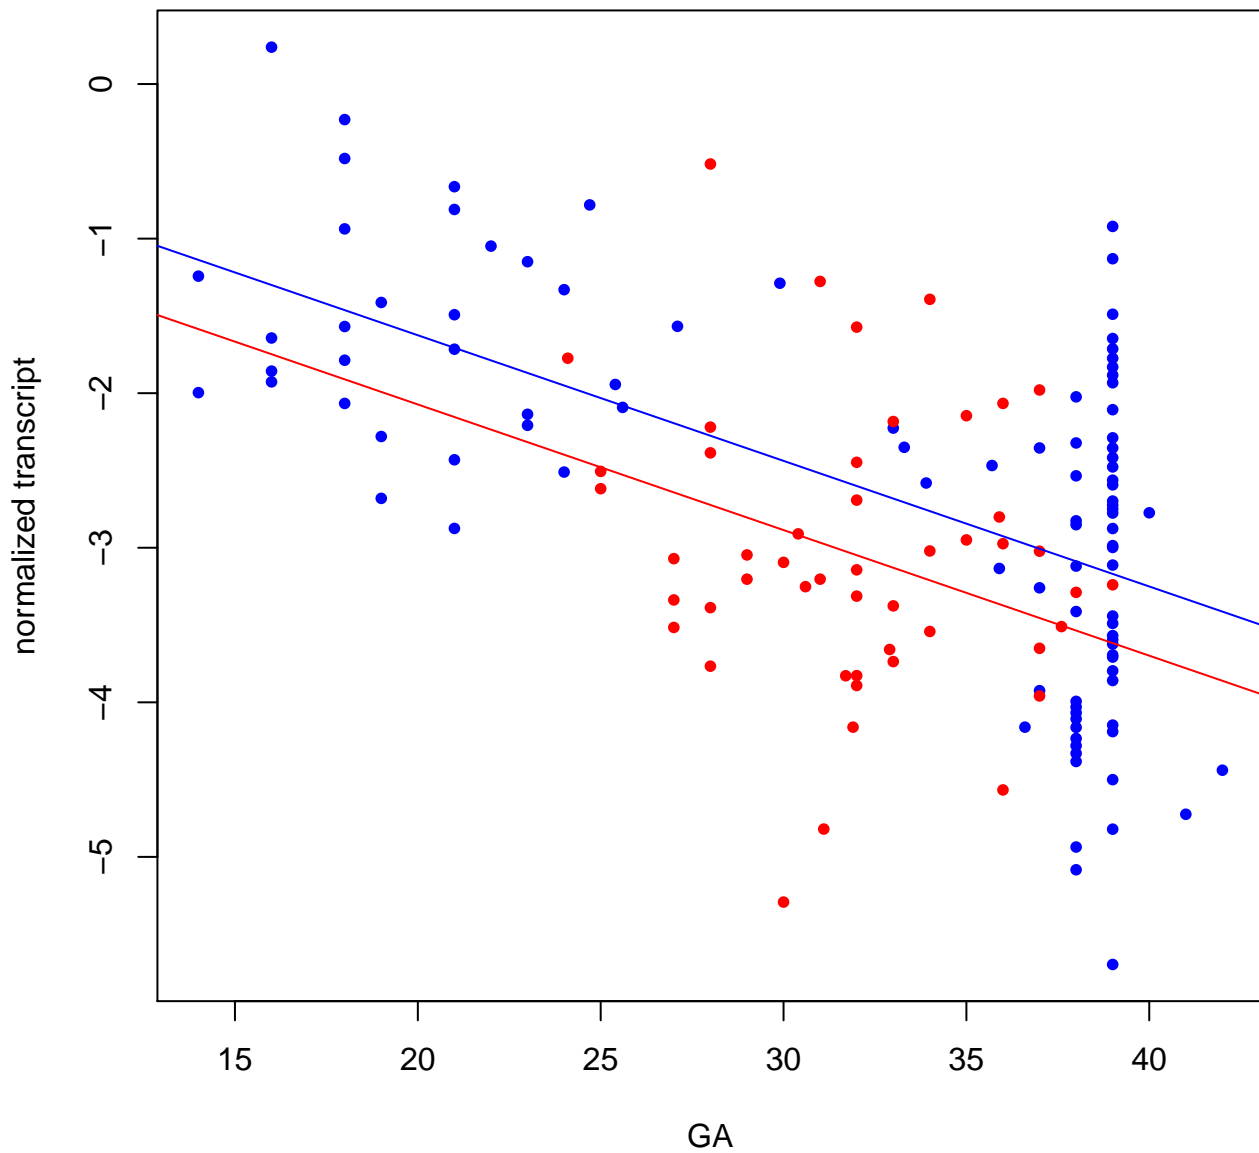

# 213425\_at

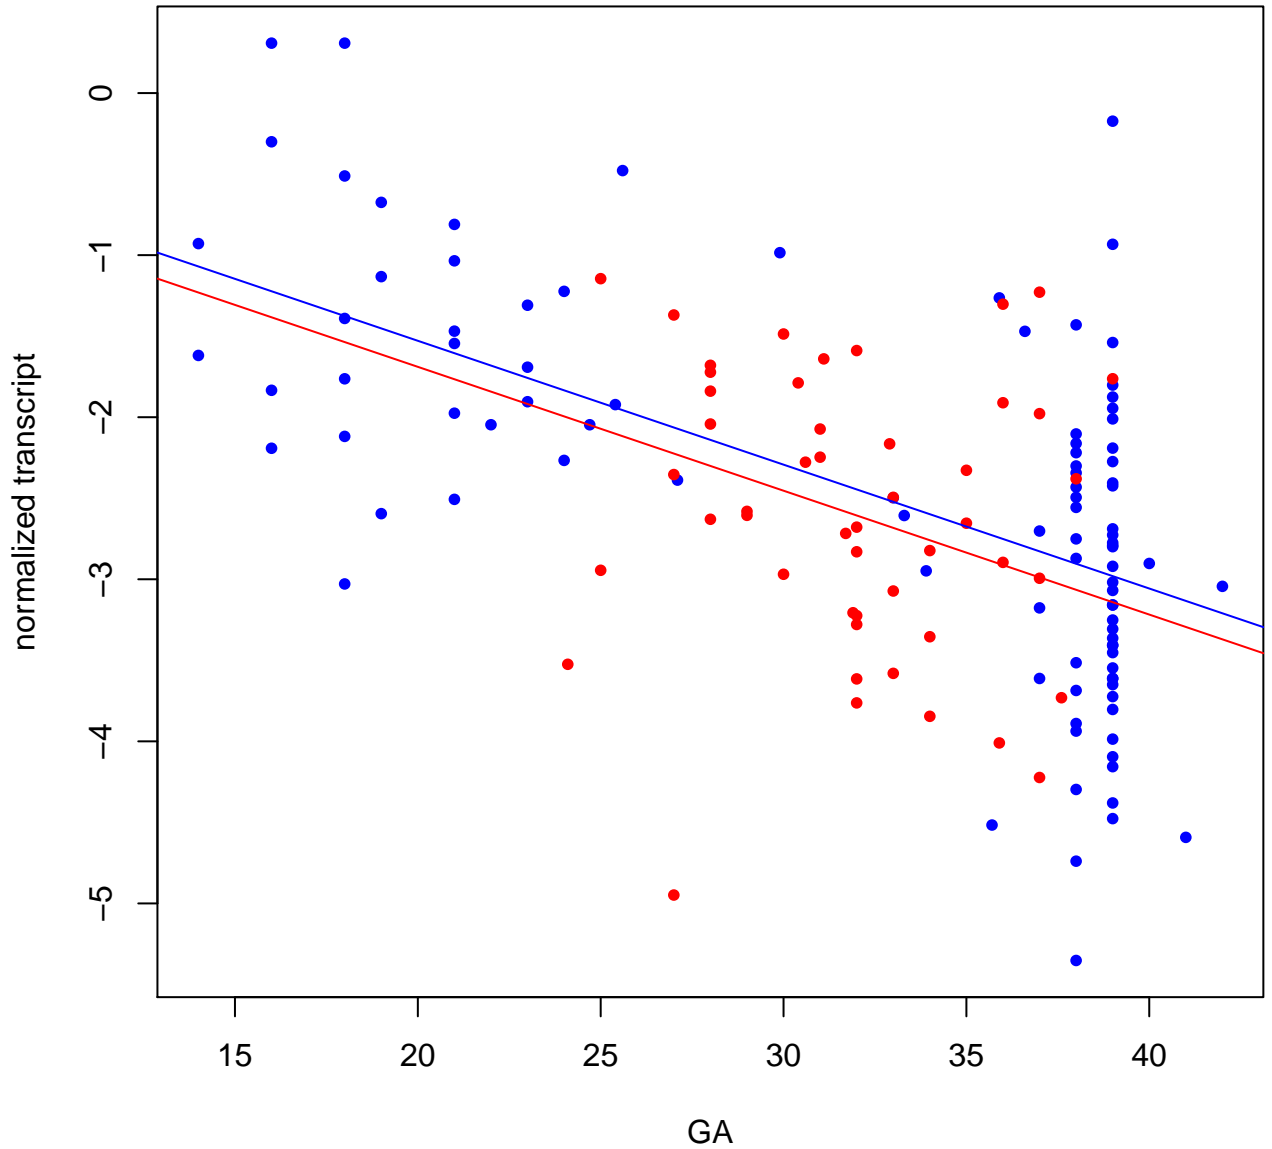

# 201033\_x\_at

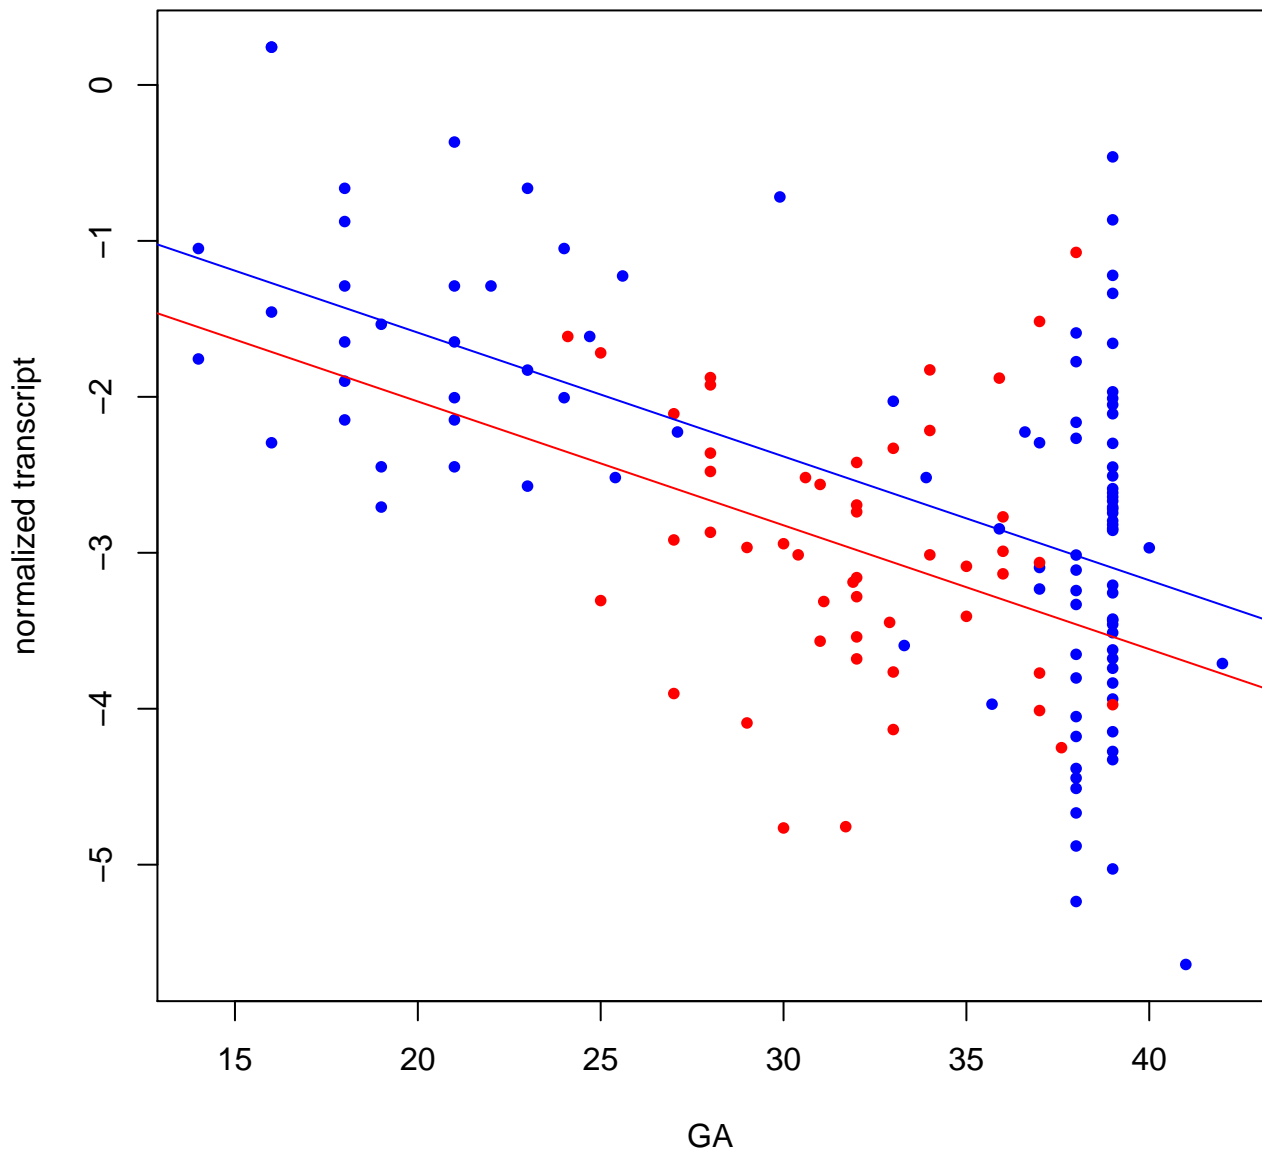



# 211720\_x\_at

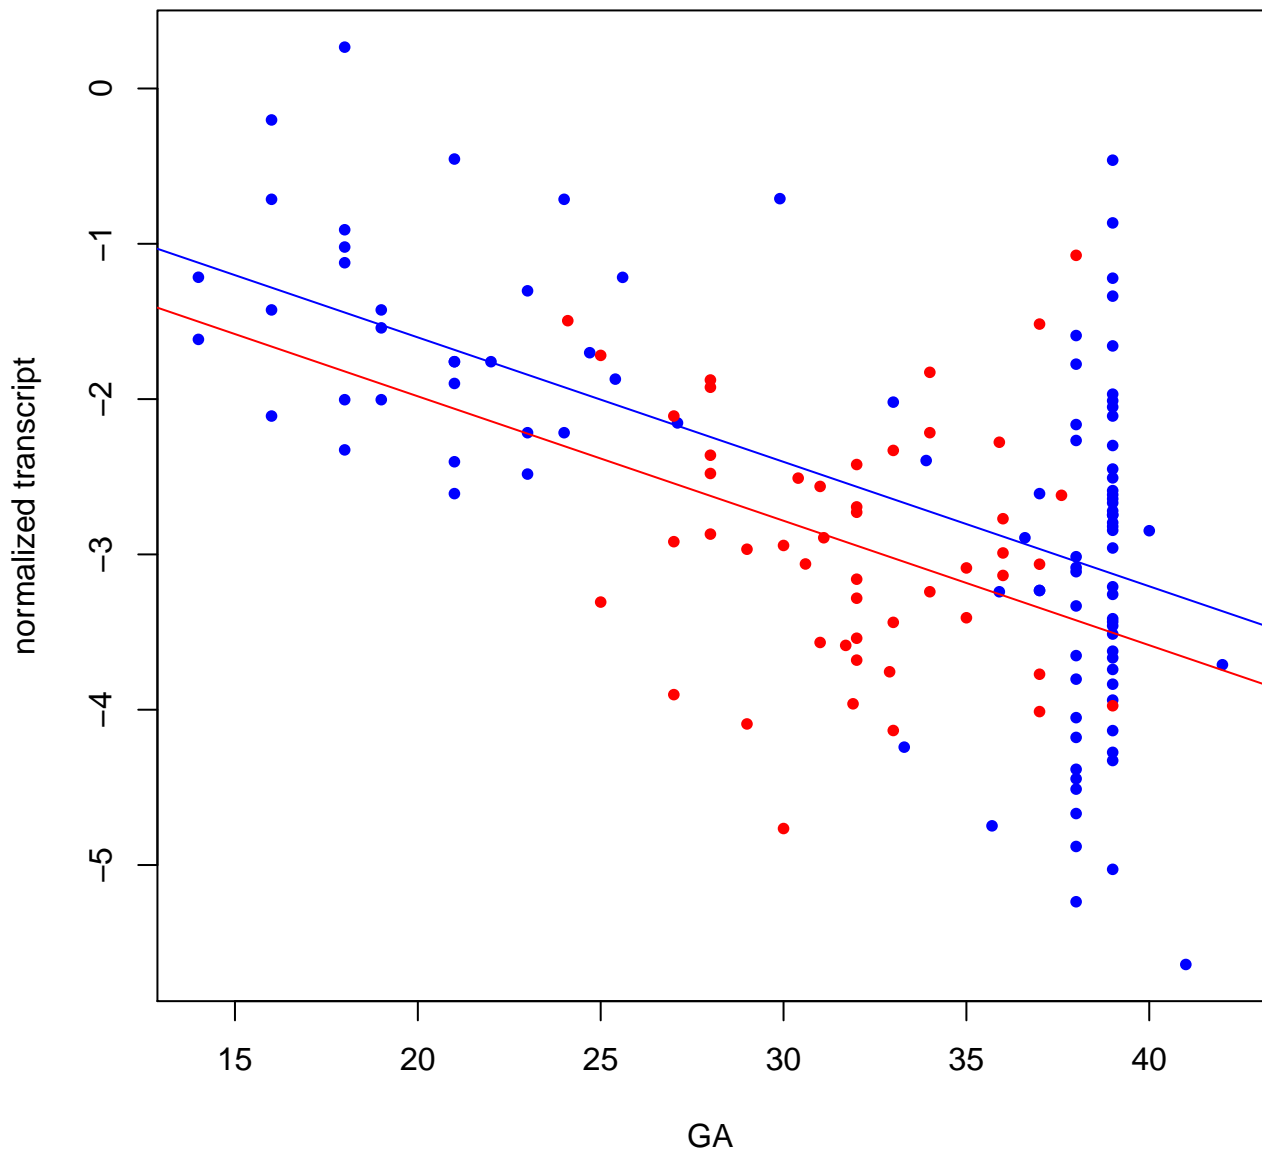



# 208856\_x\_at.2

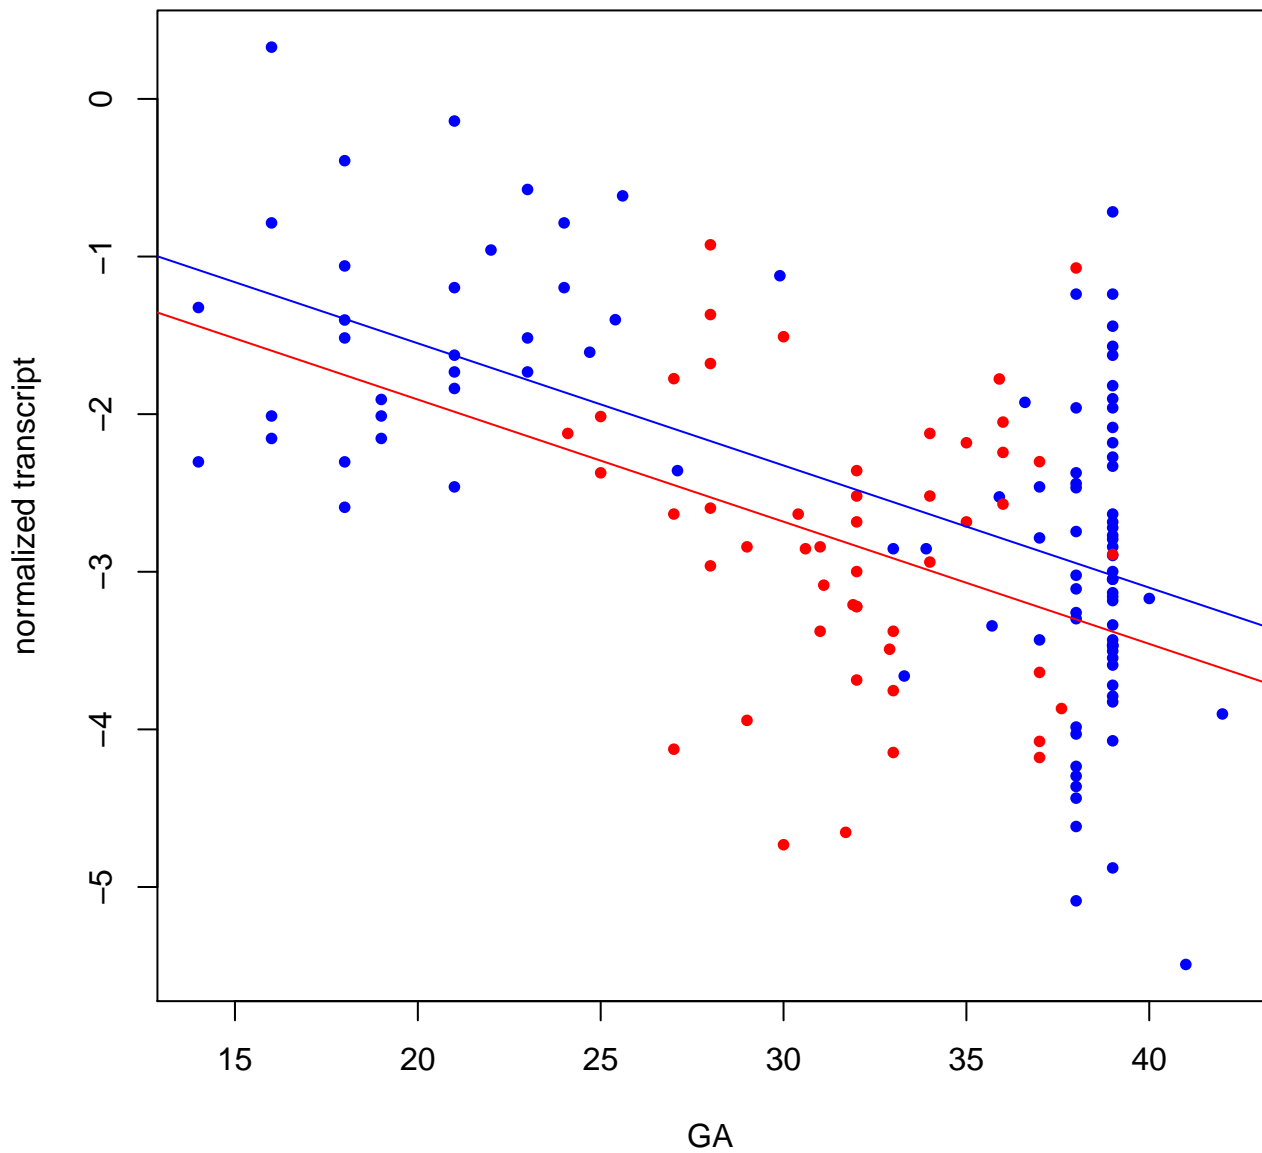

# 201033\_x\_at.2

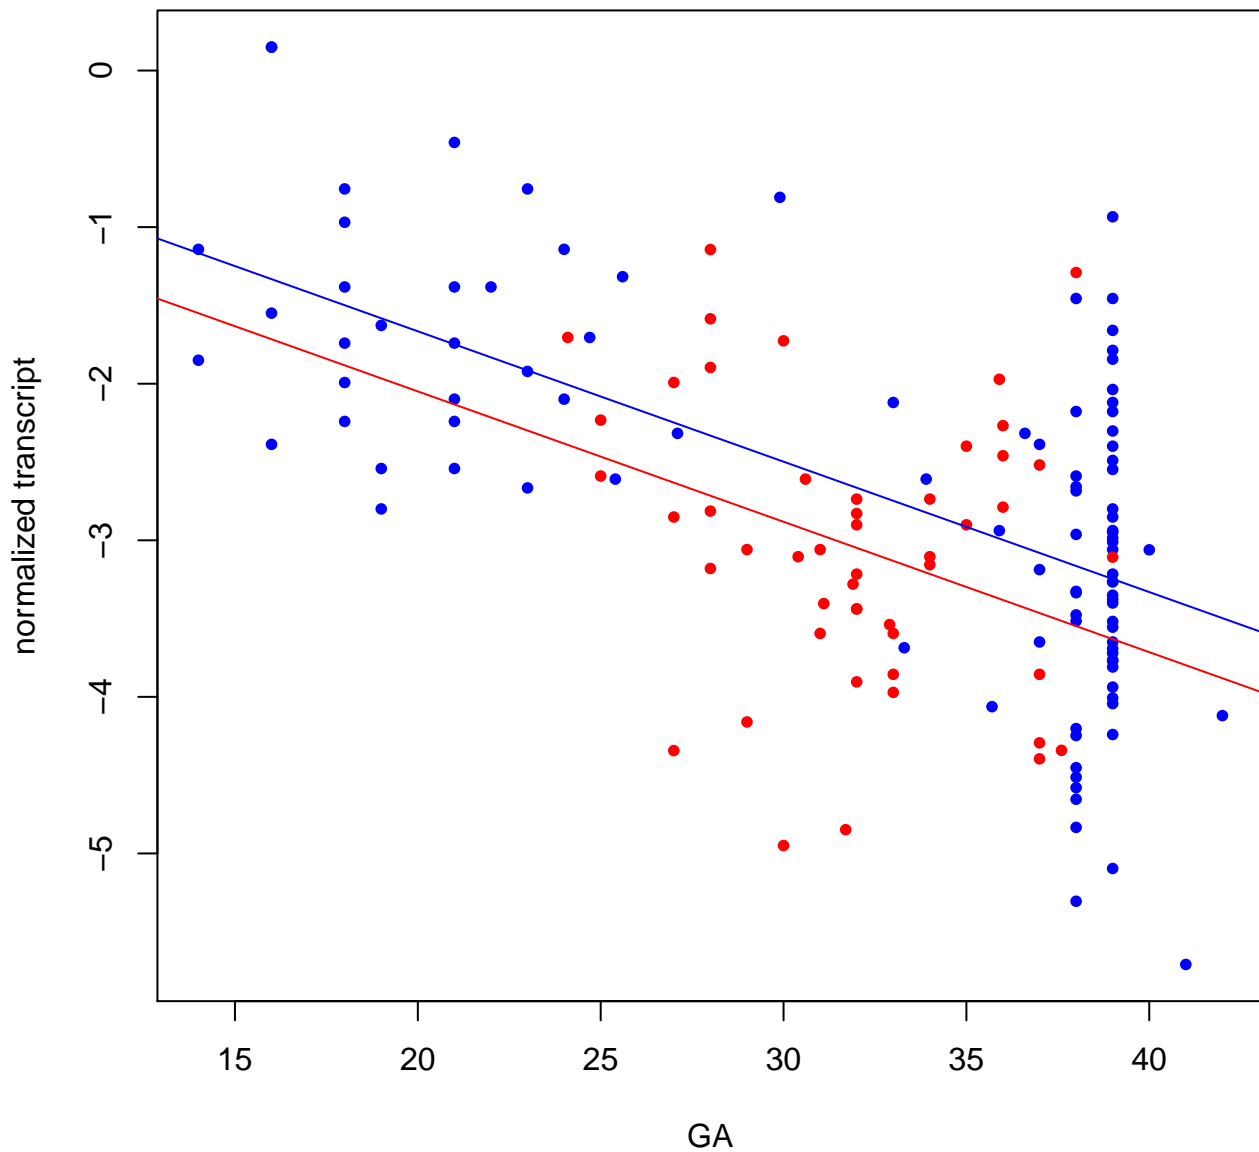

# 211972\_x\_at.2

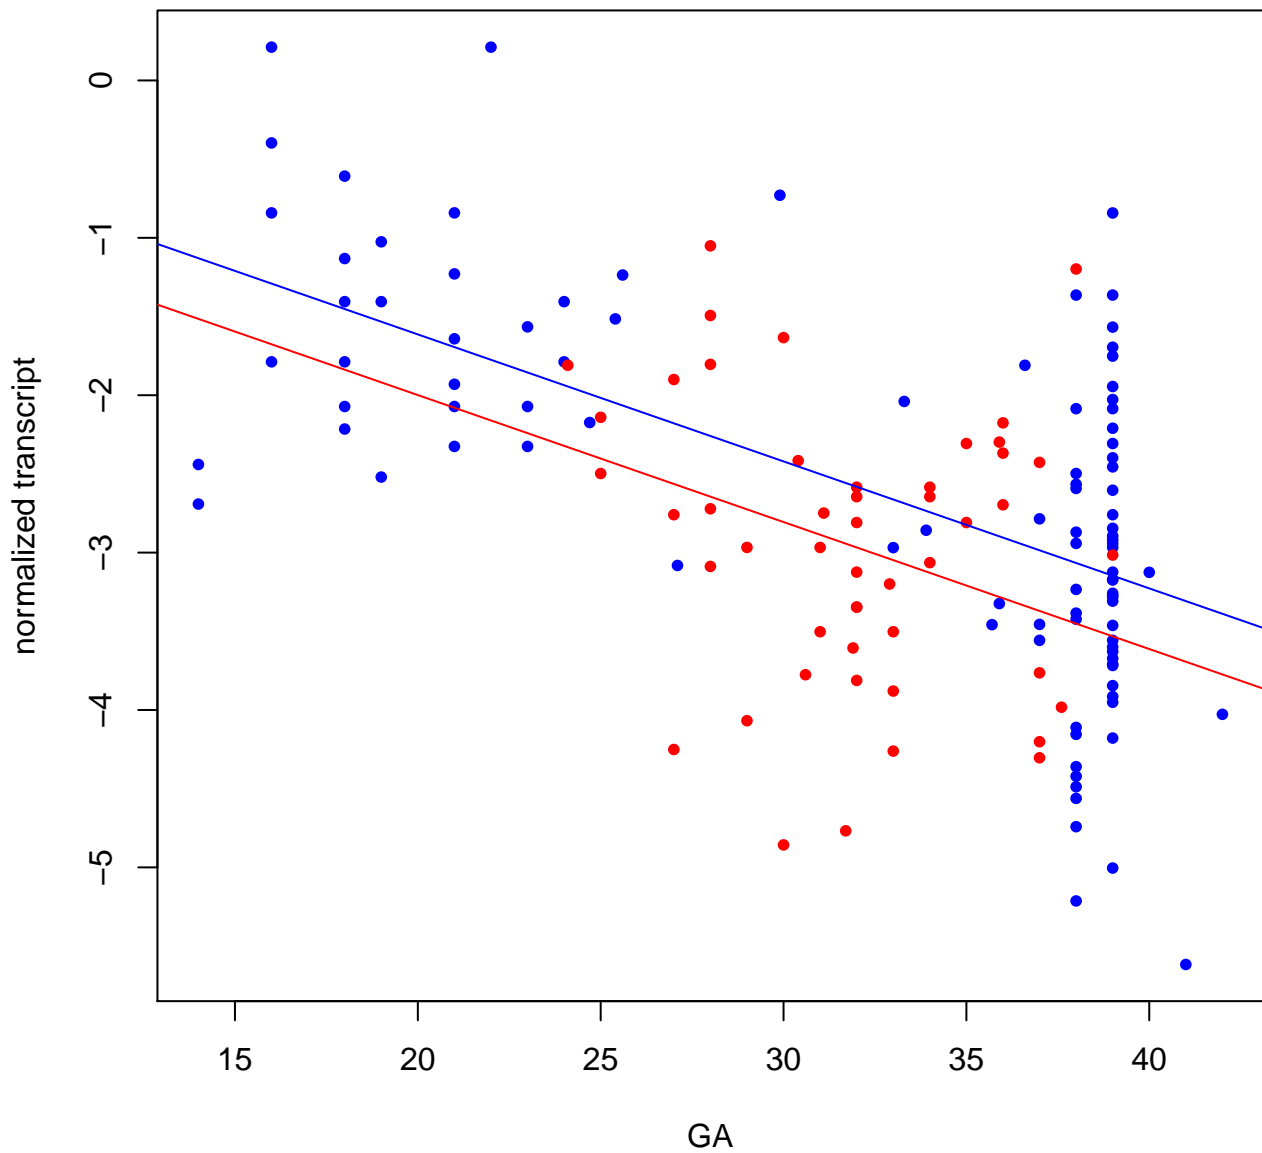

# 211720\_x\_at.2

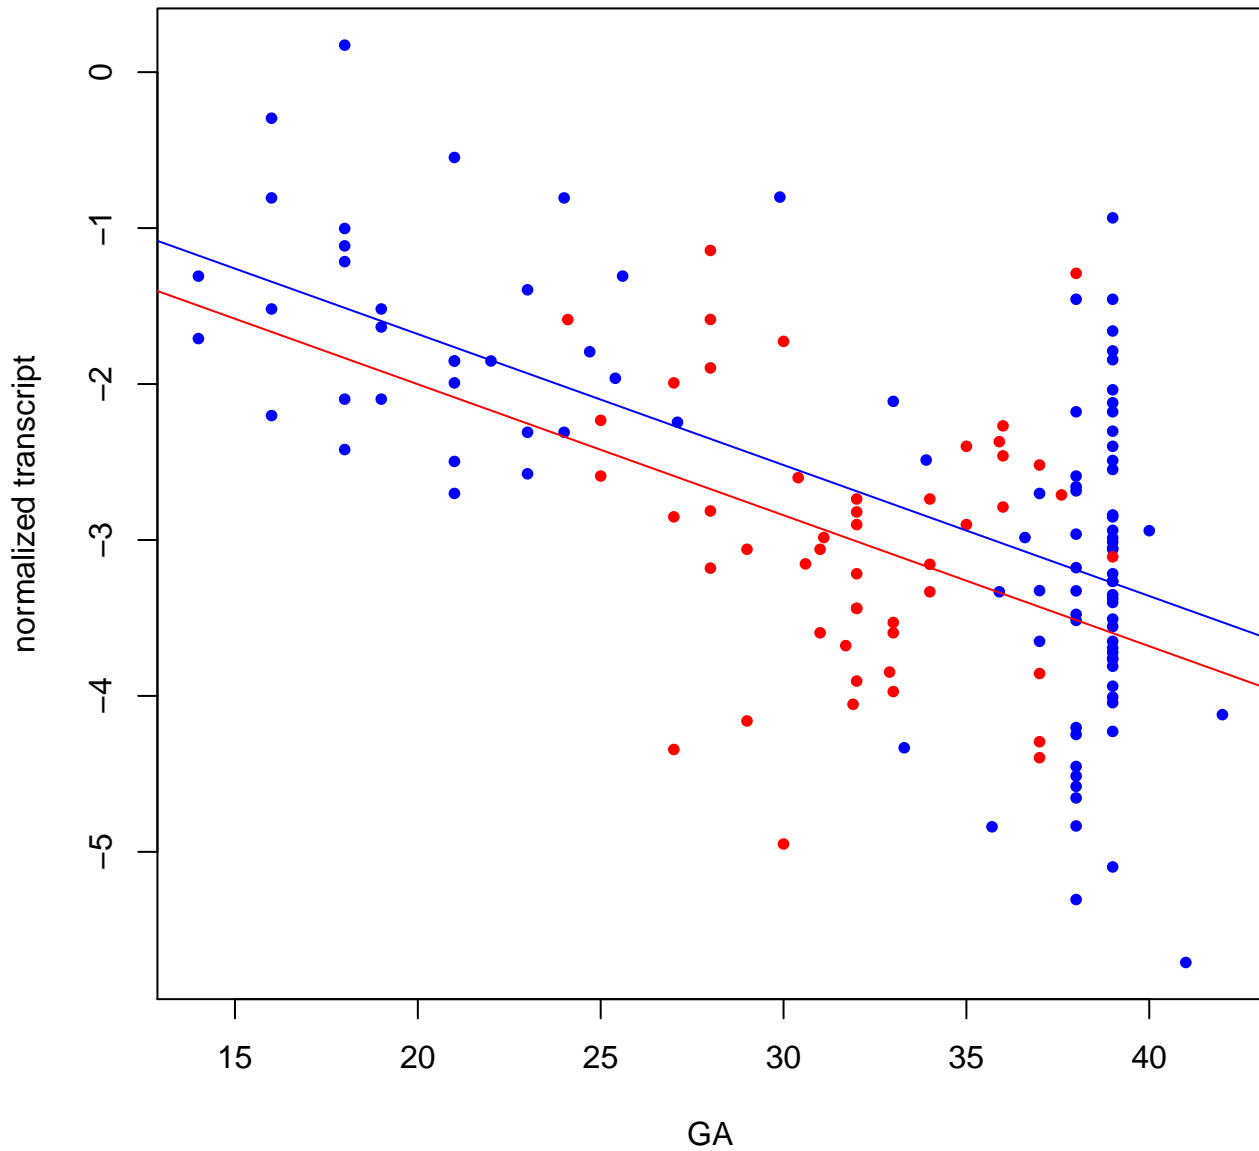

# 208096\_s\_at

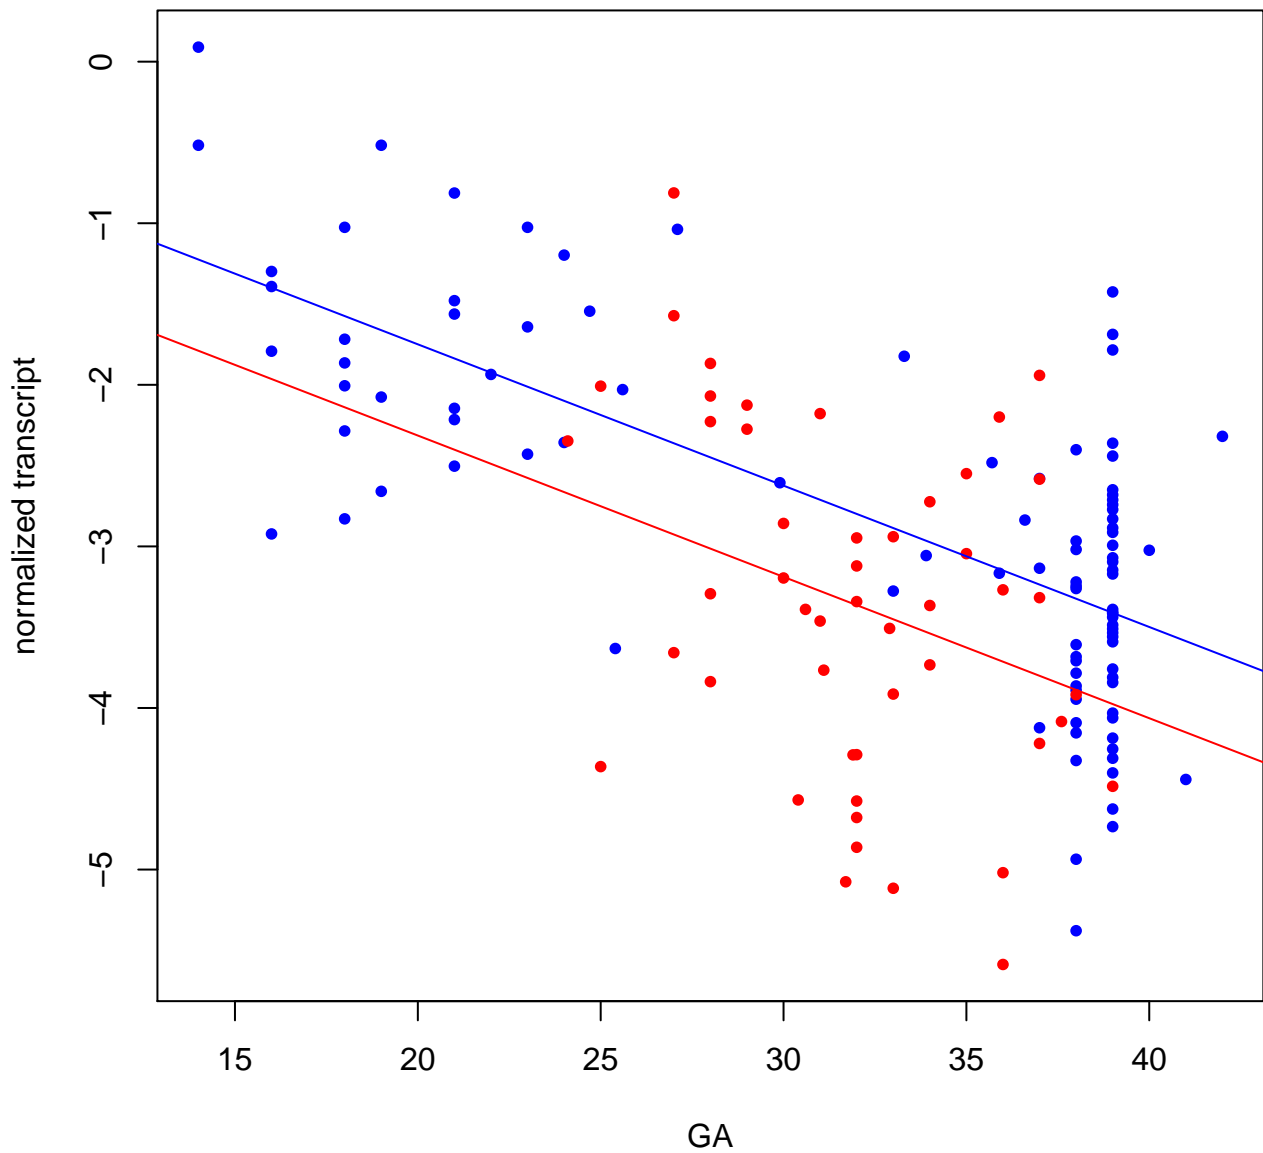

# 209498\_at

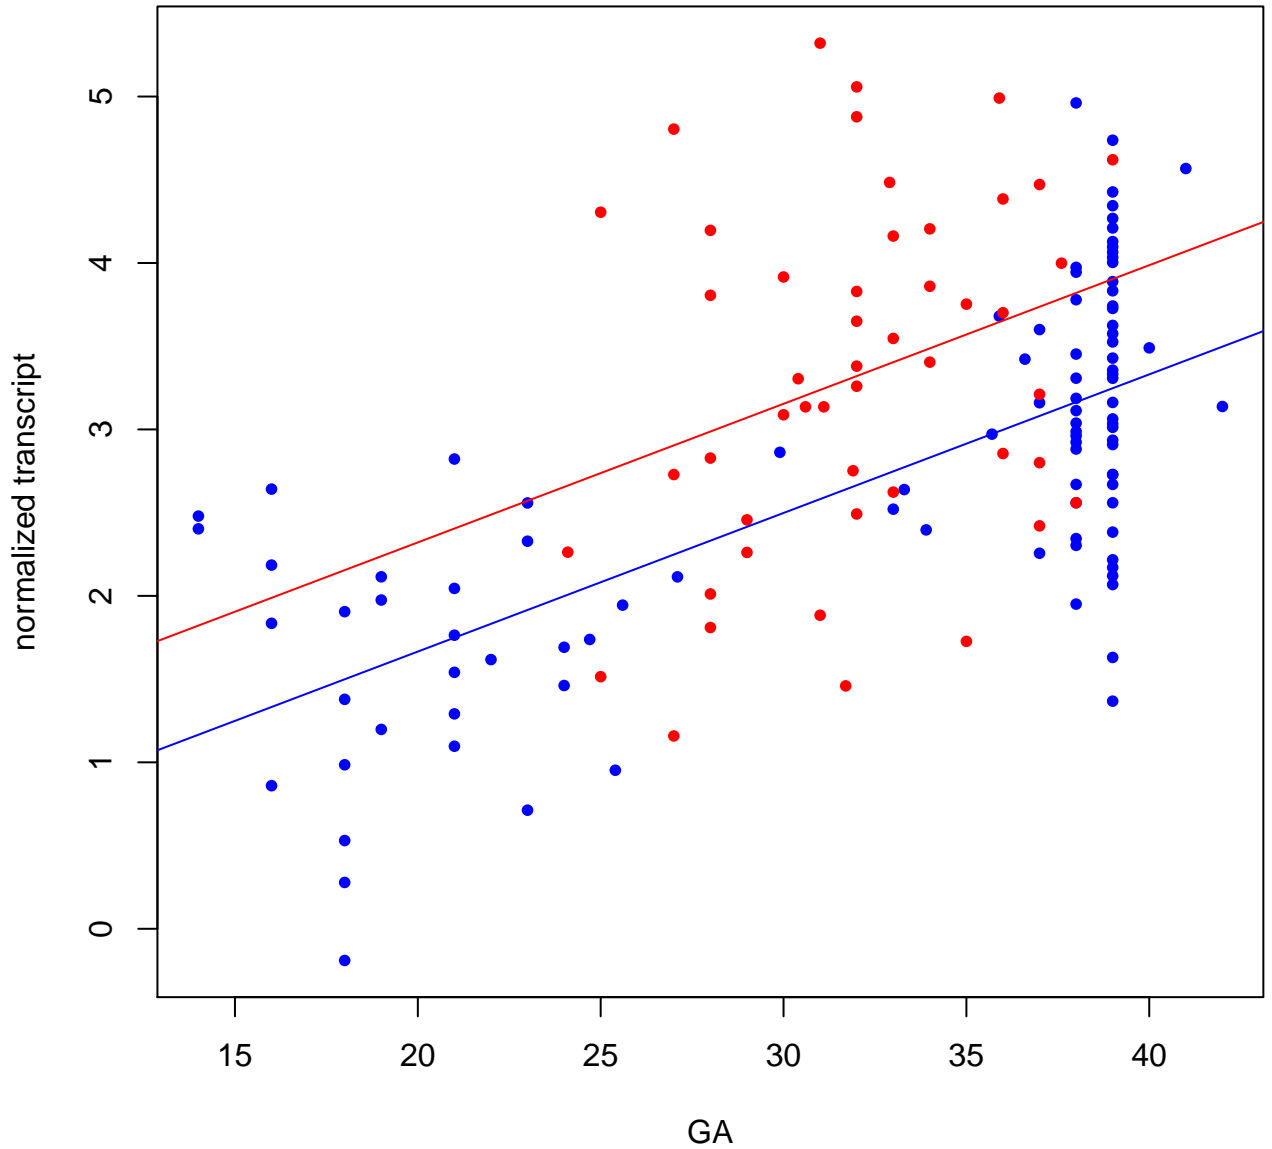

# 209498\_at.1

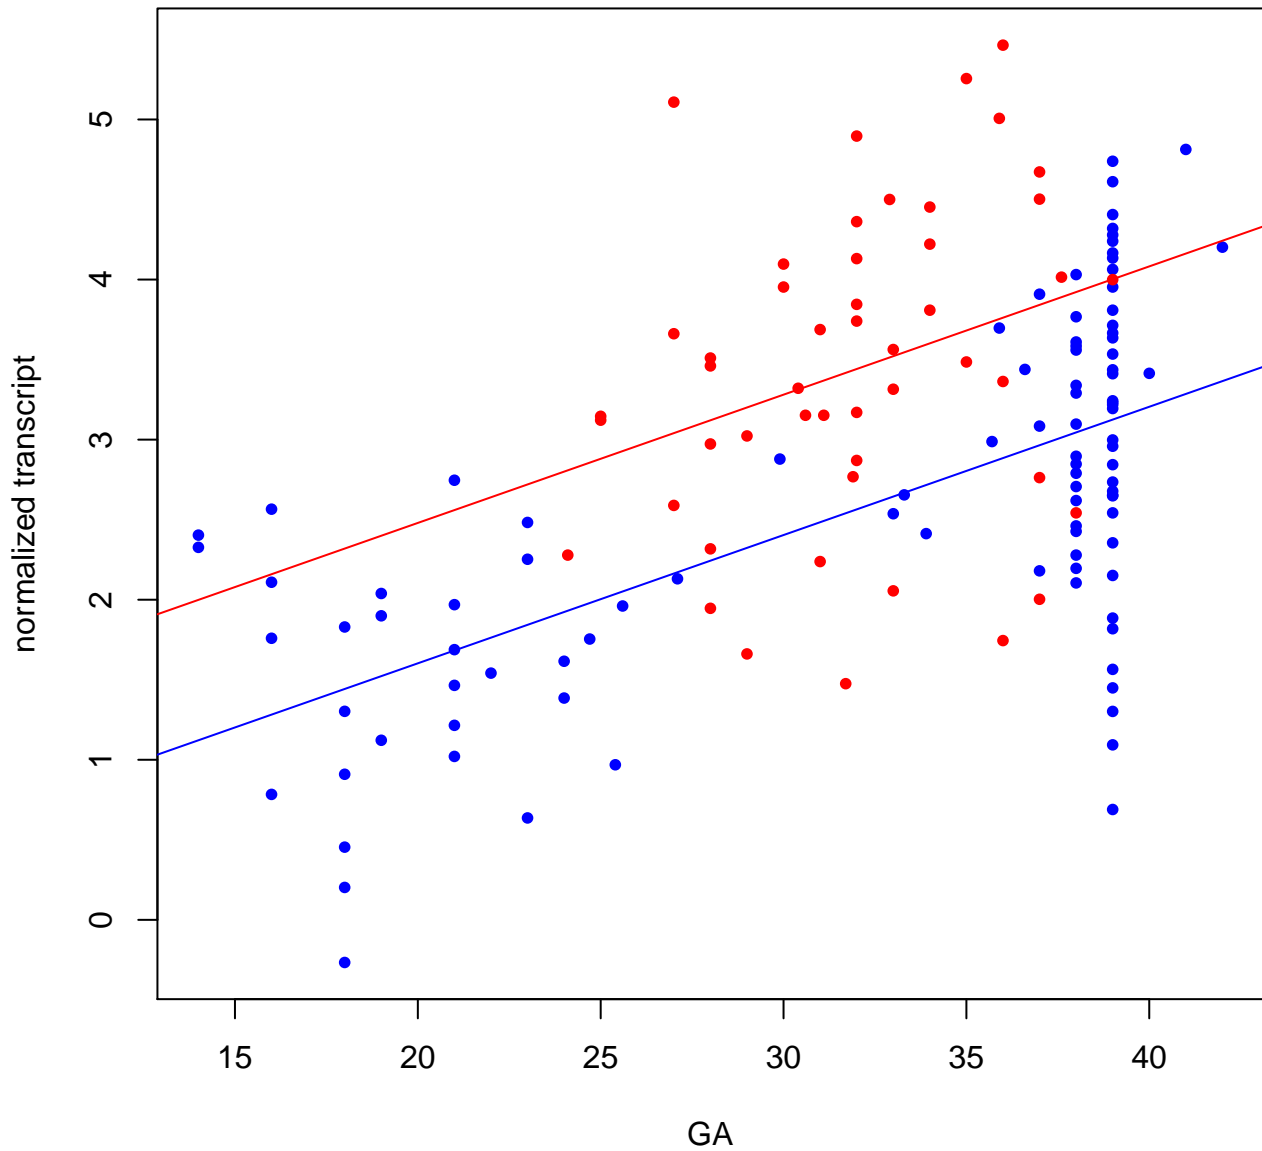

# 206214\_at

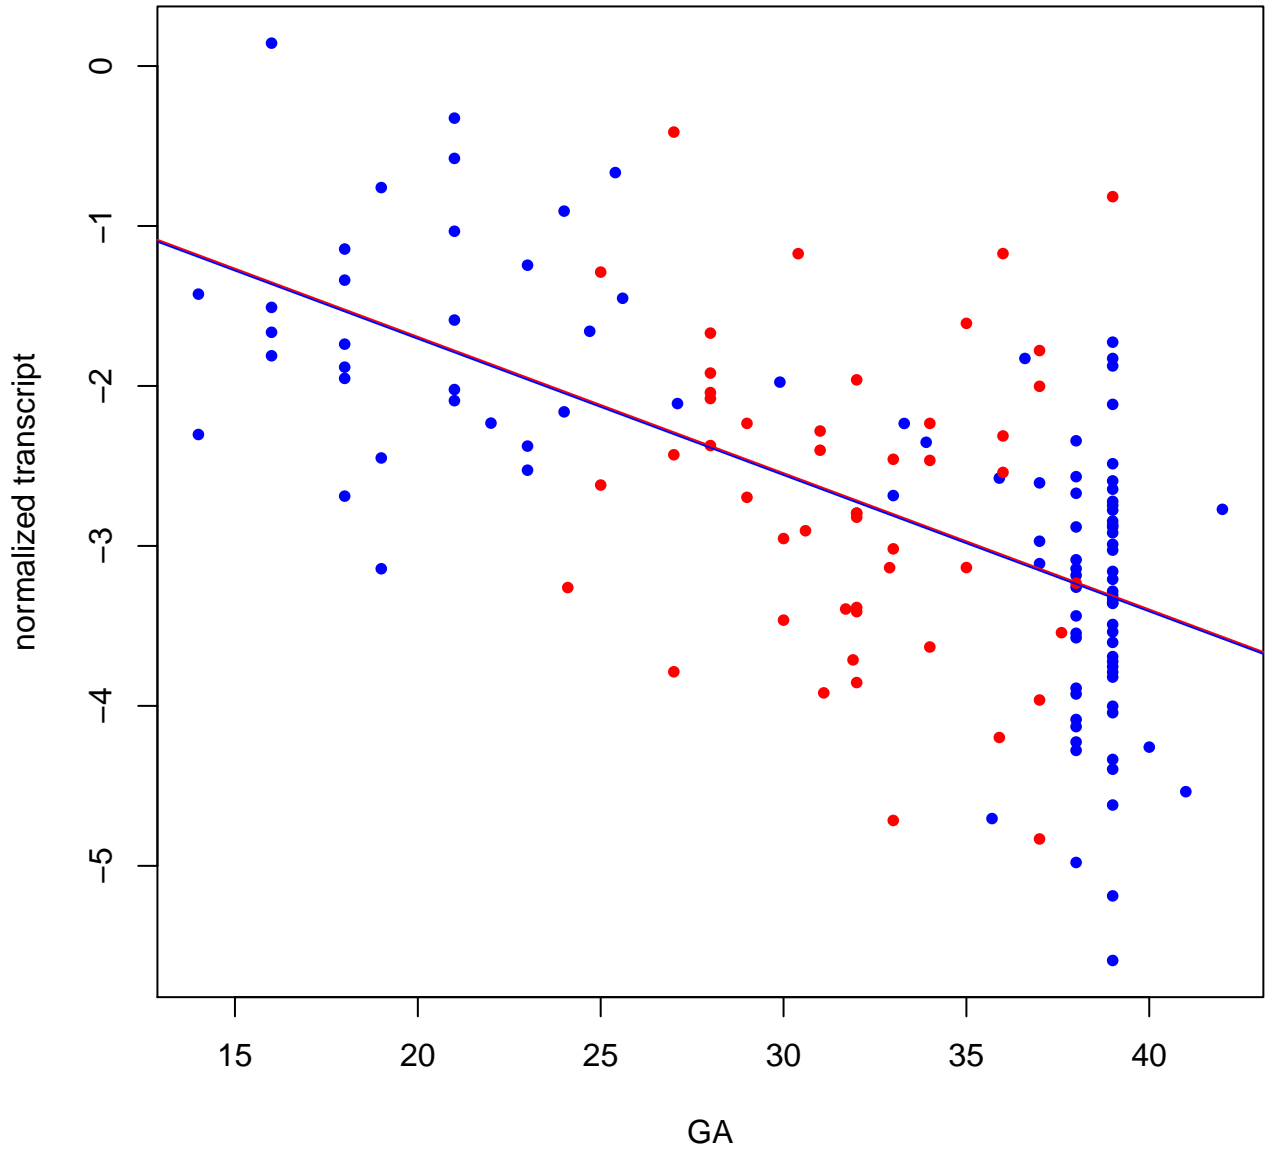





# 219091\_s\_at

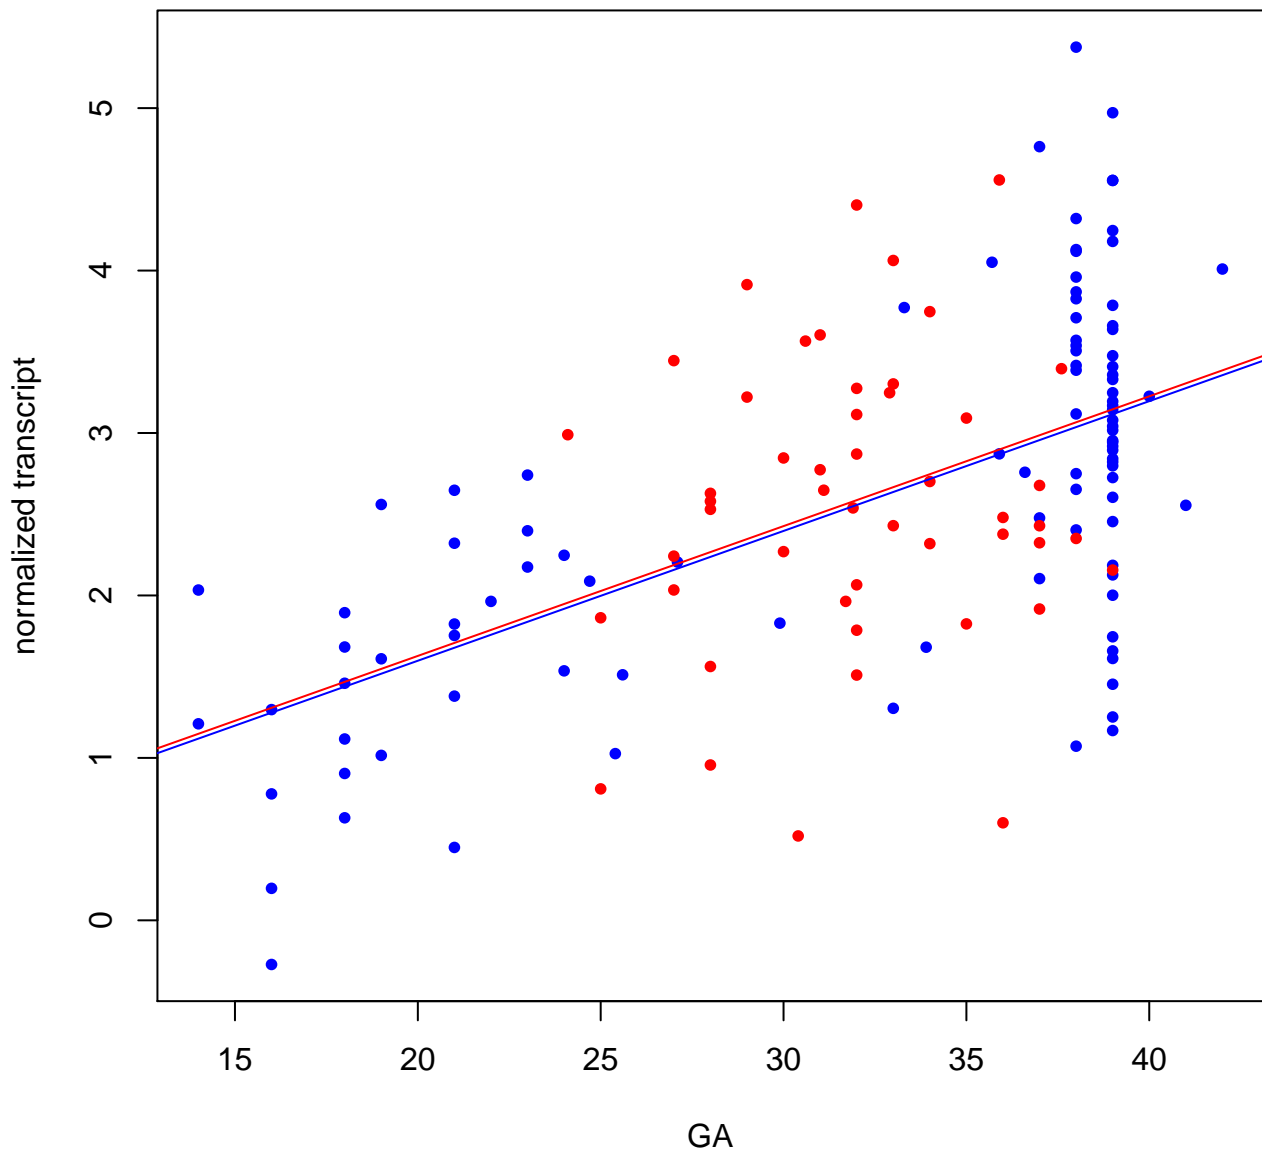

# 202403\_s\_at

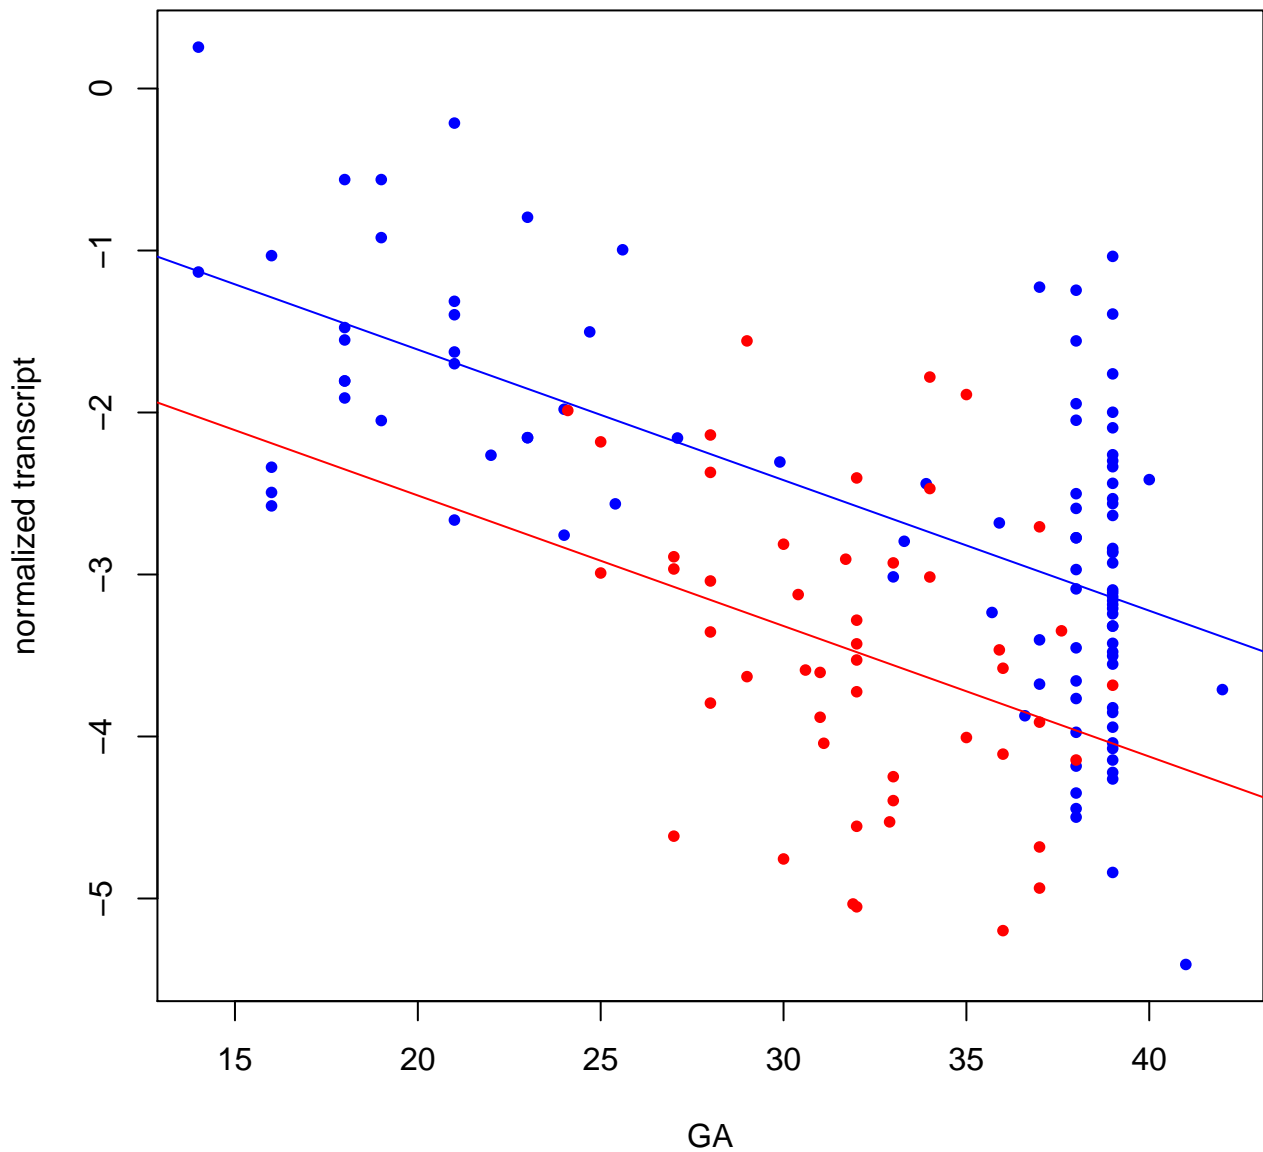

# 202404\_s\_at

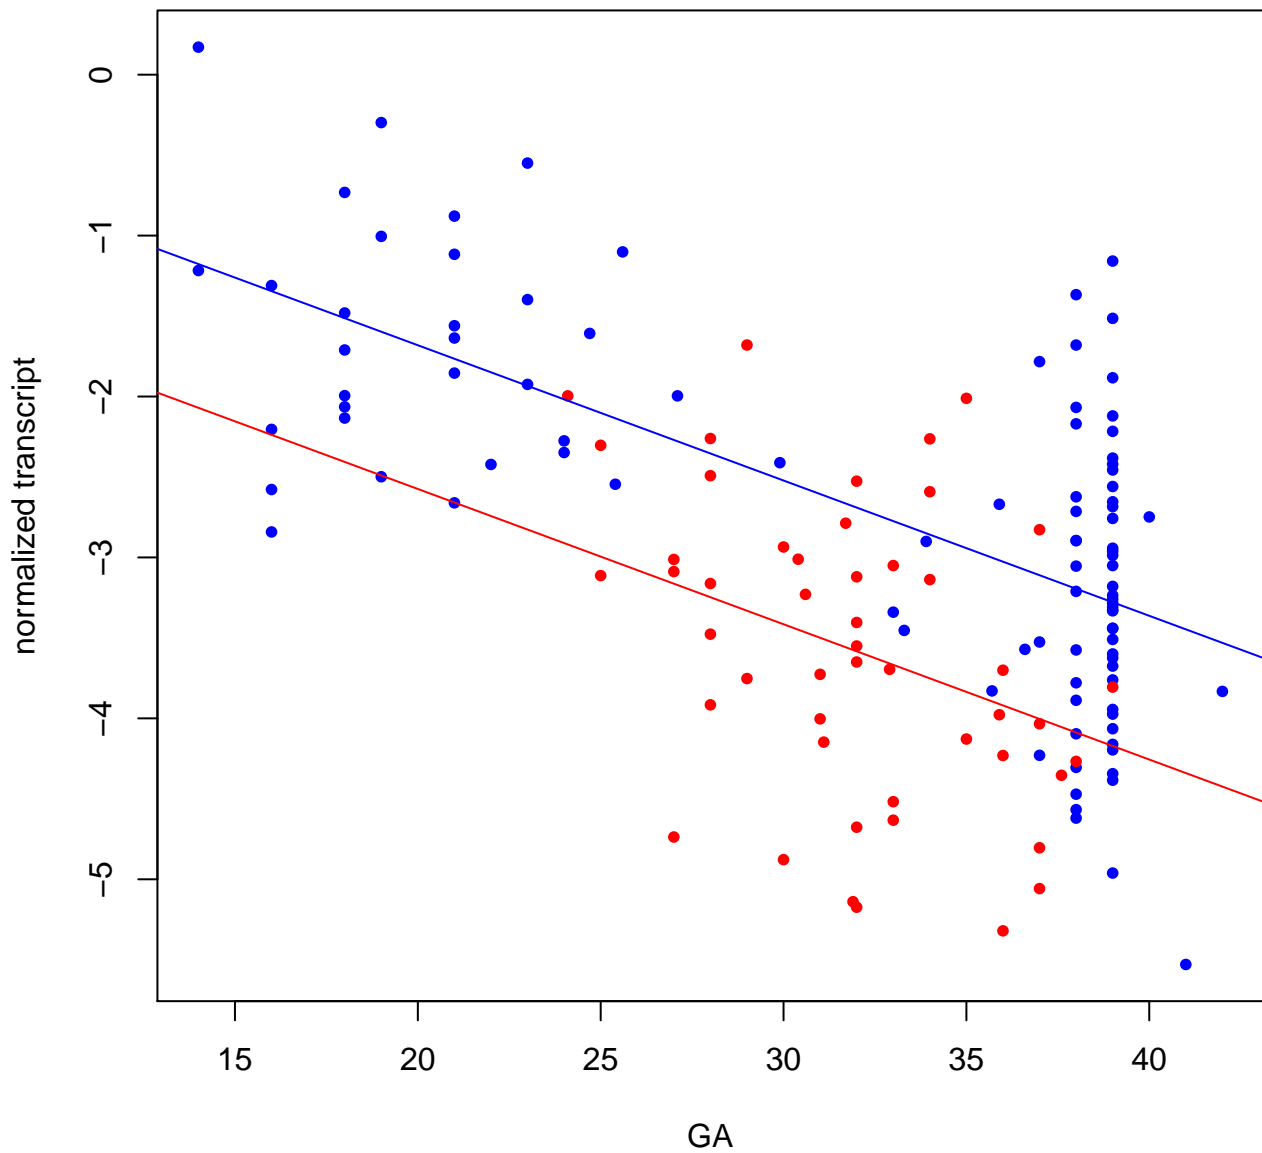

# 209335\_at

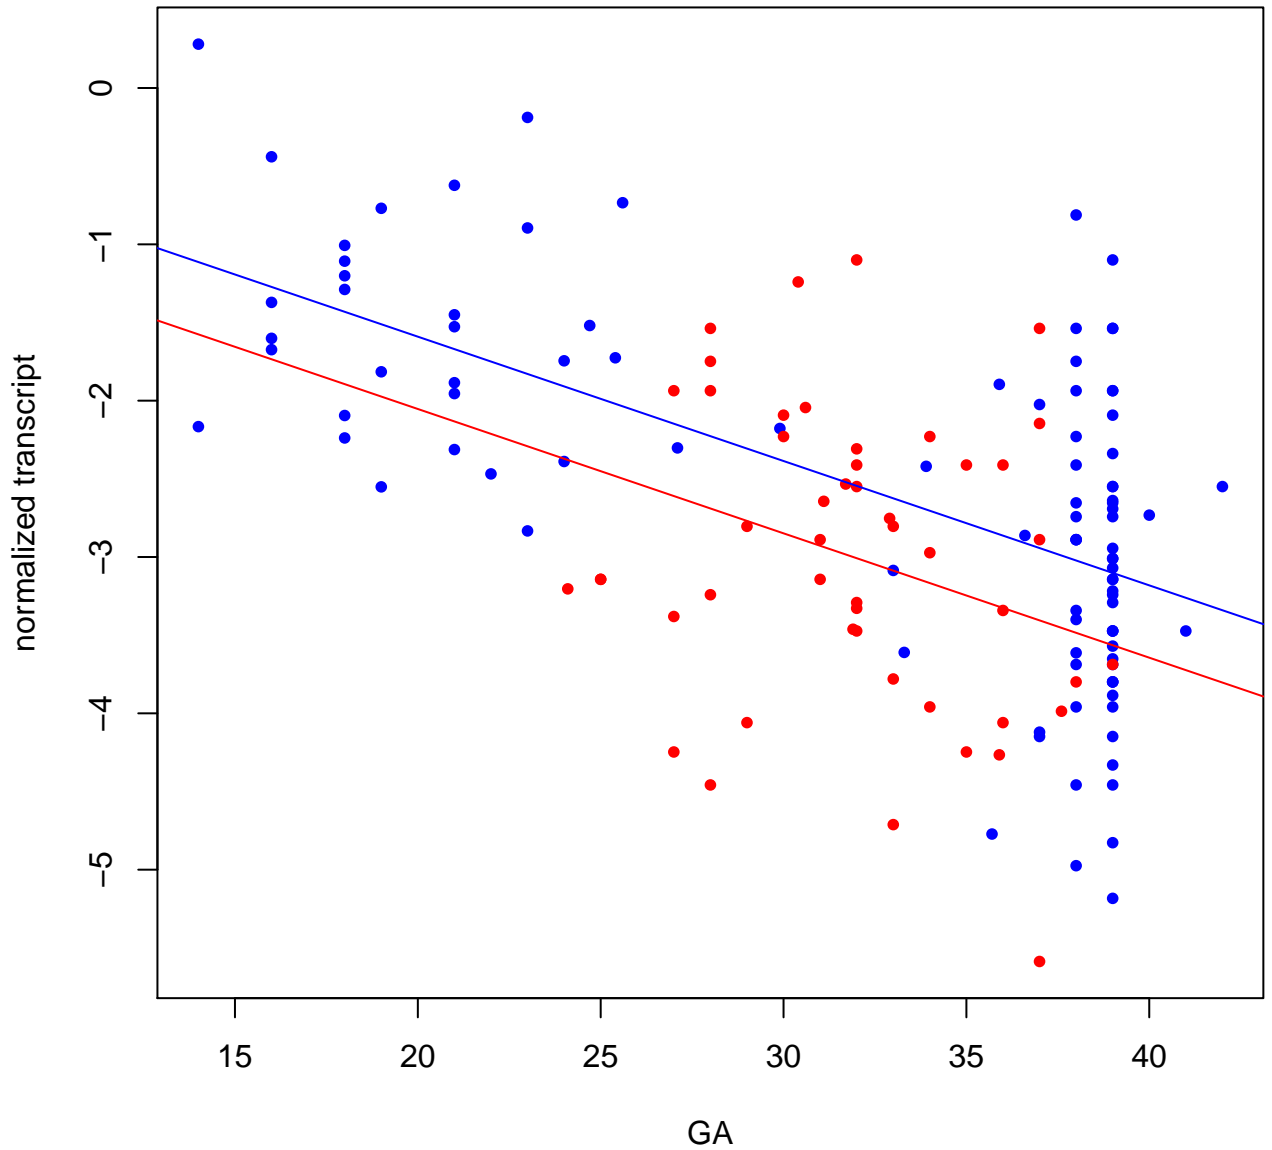

# 209335\_at.1

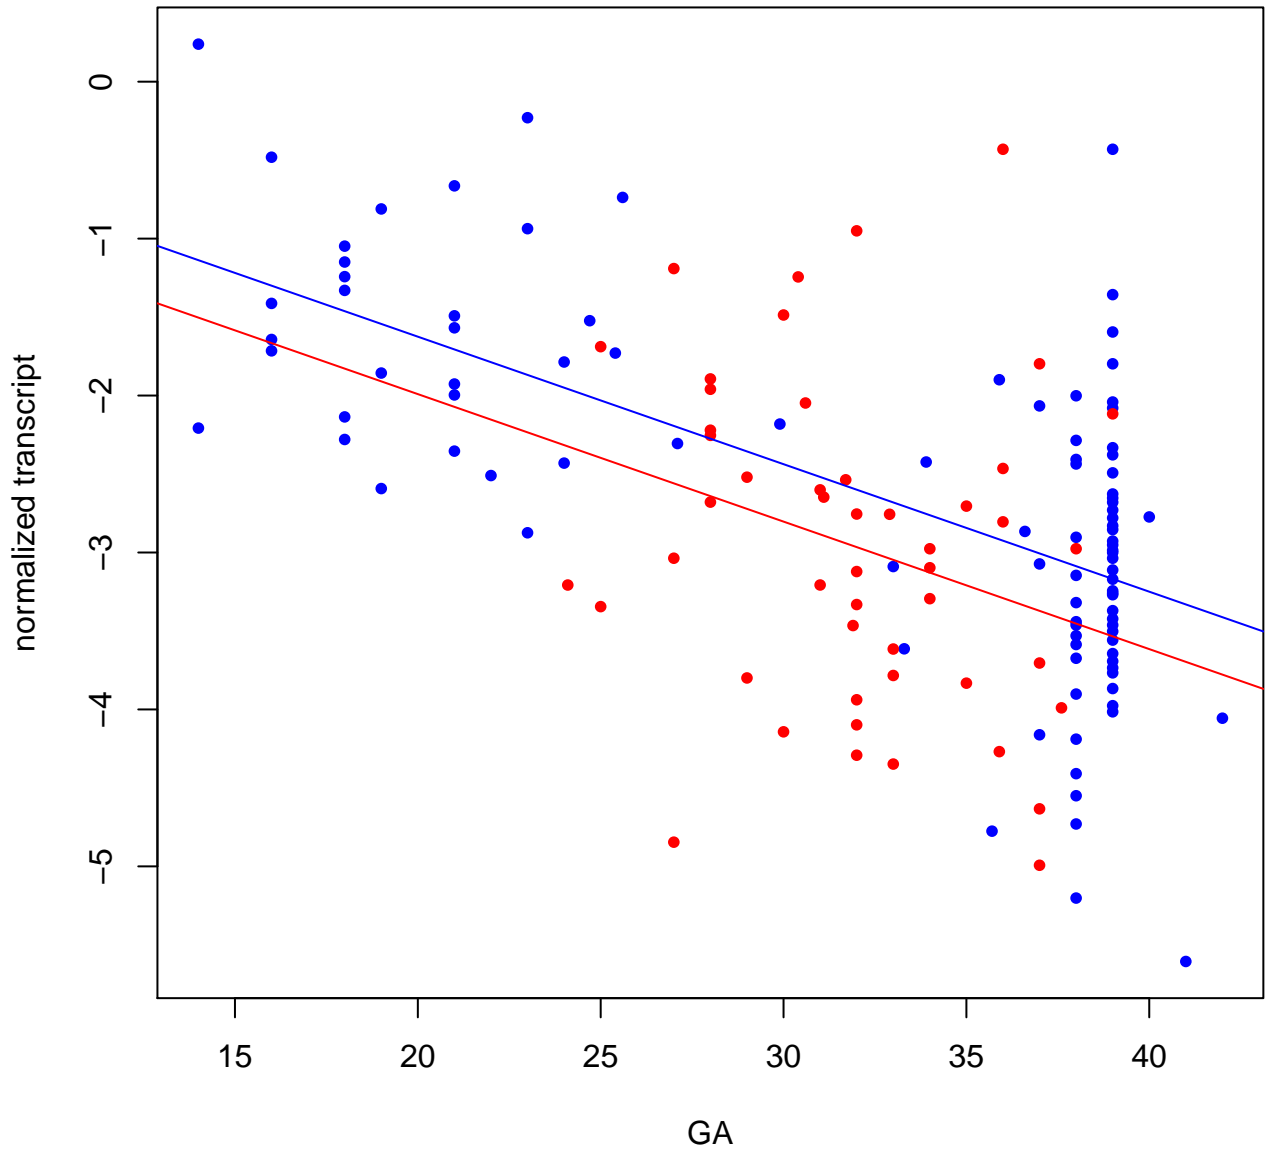

# 209335\_at.2

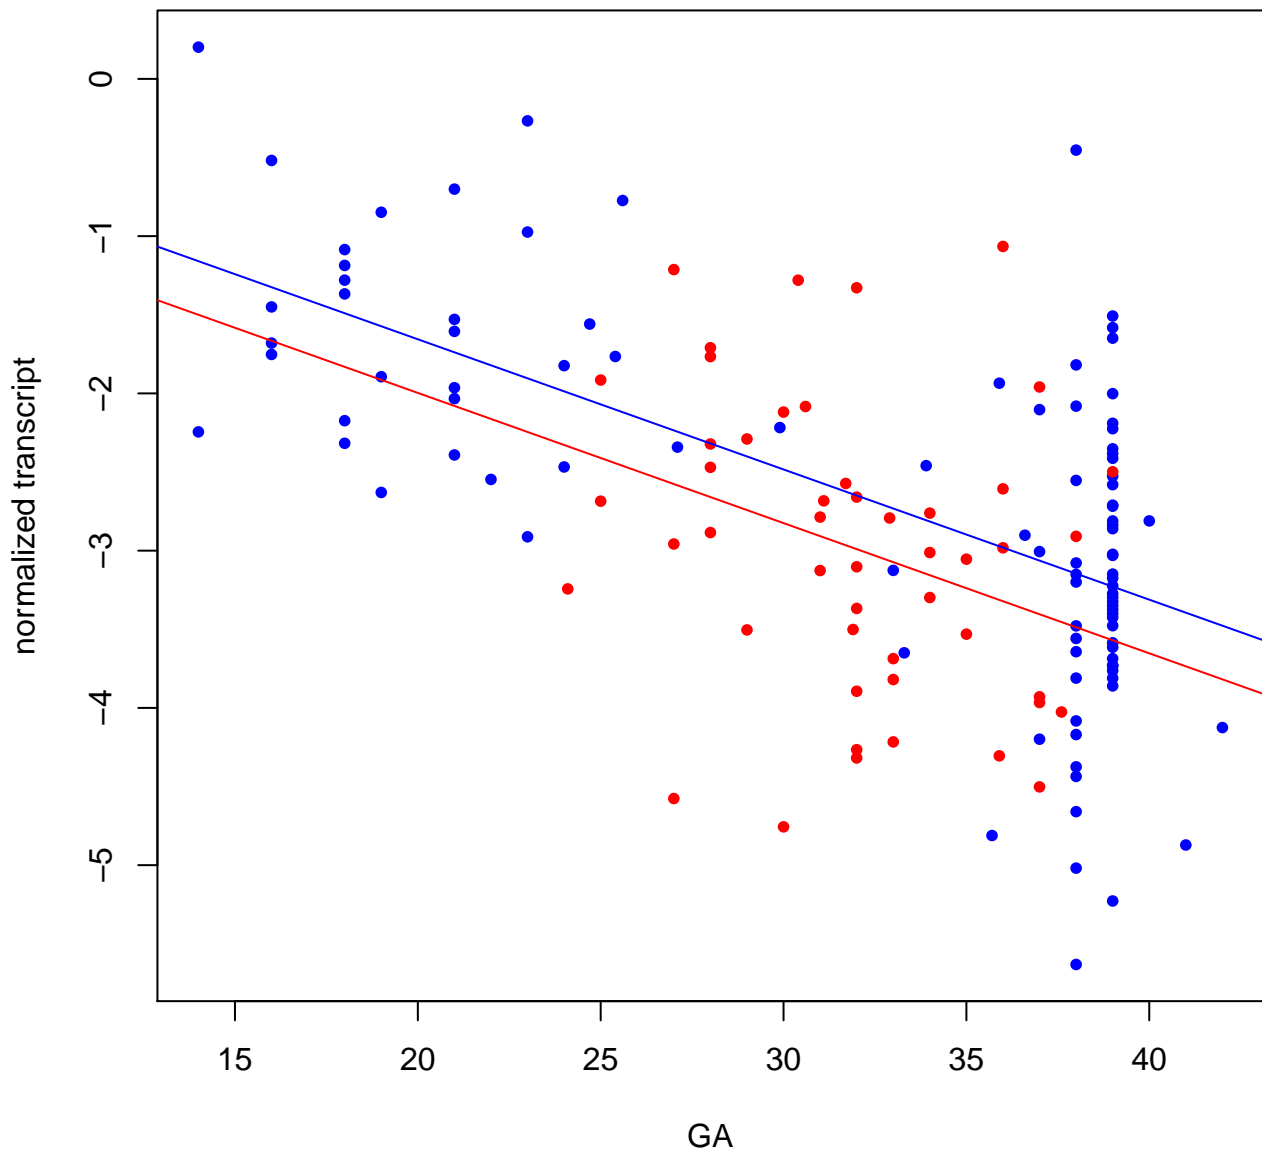





# 201744\_s\_at

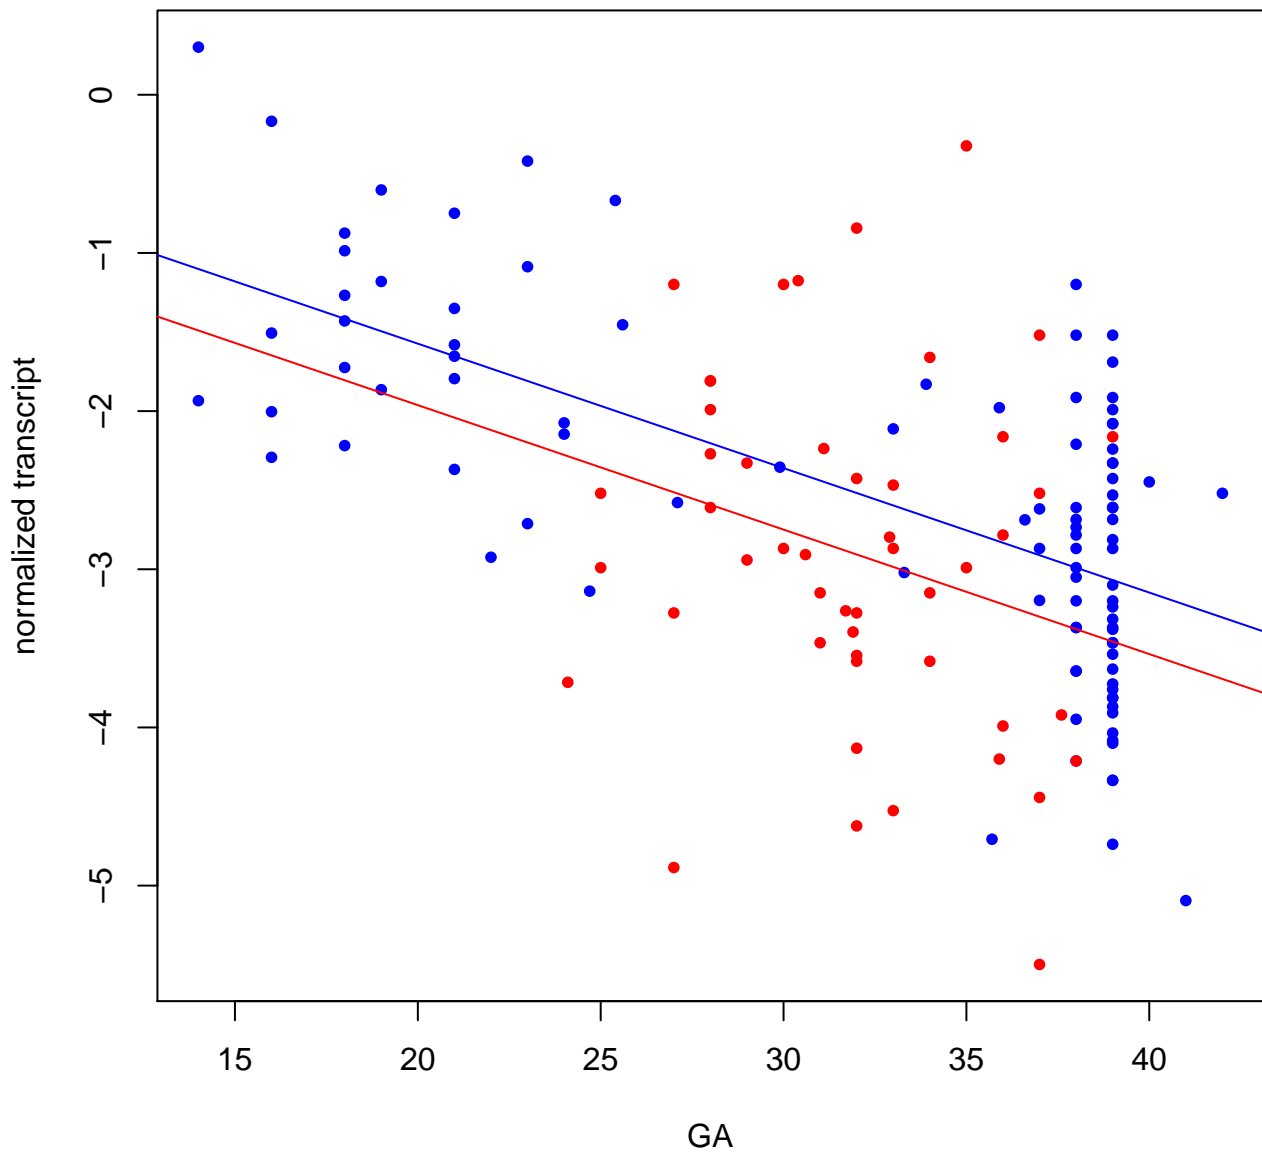

# 213864\_s\_at

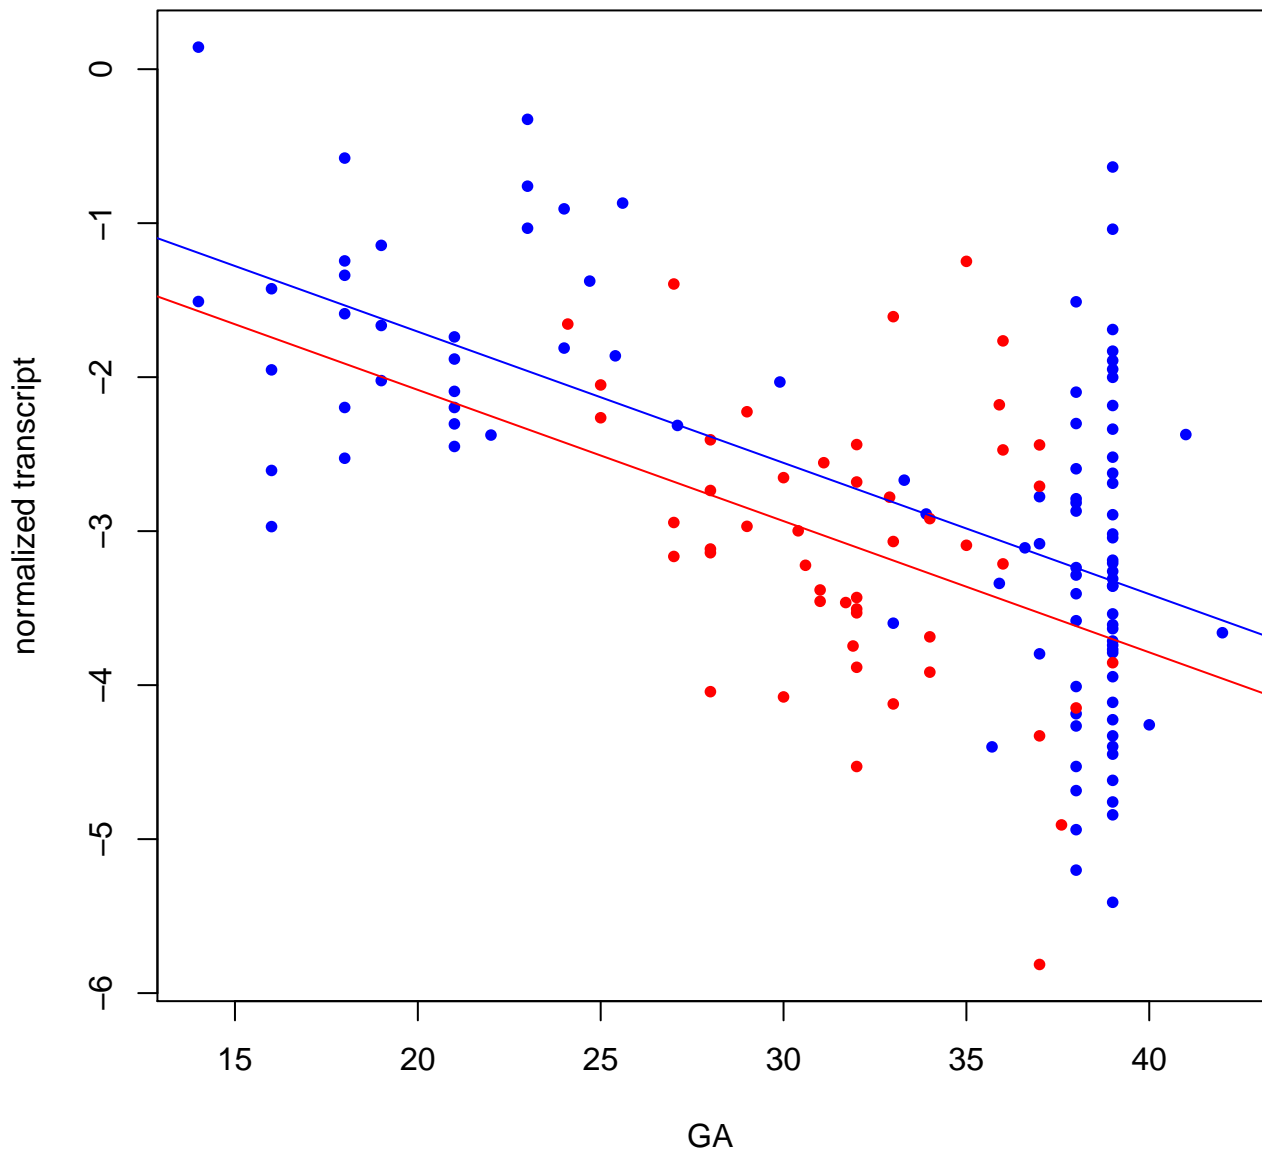

# 208753\_s\_at

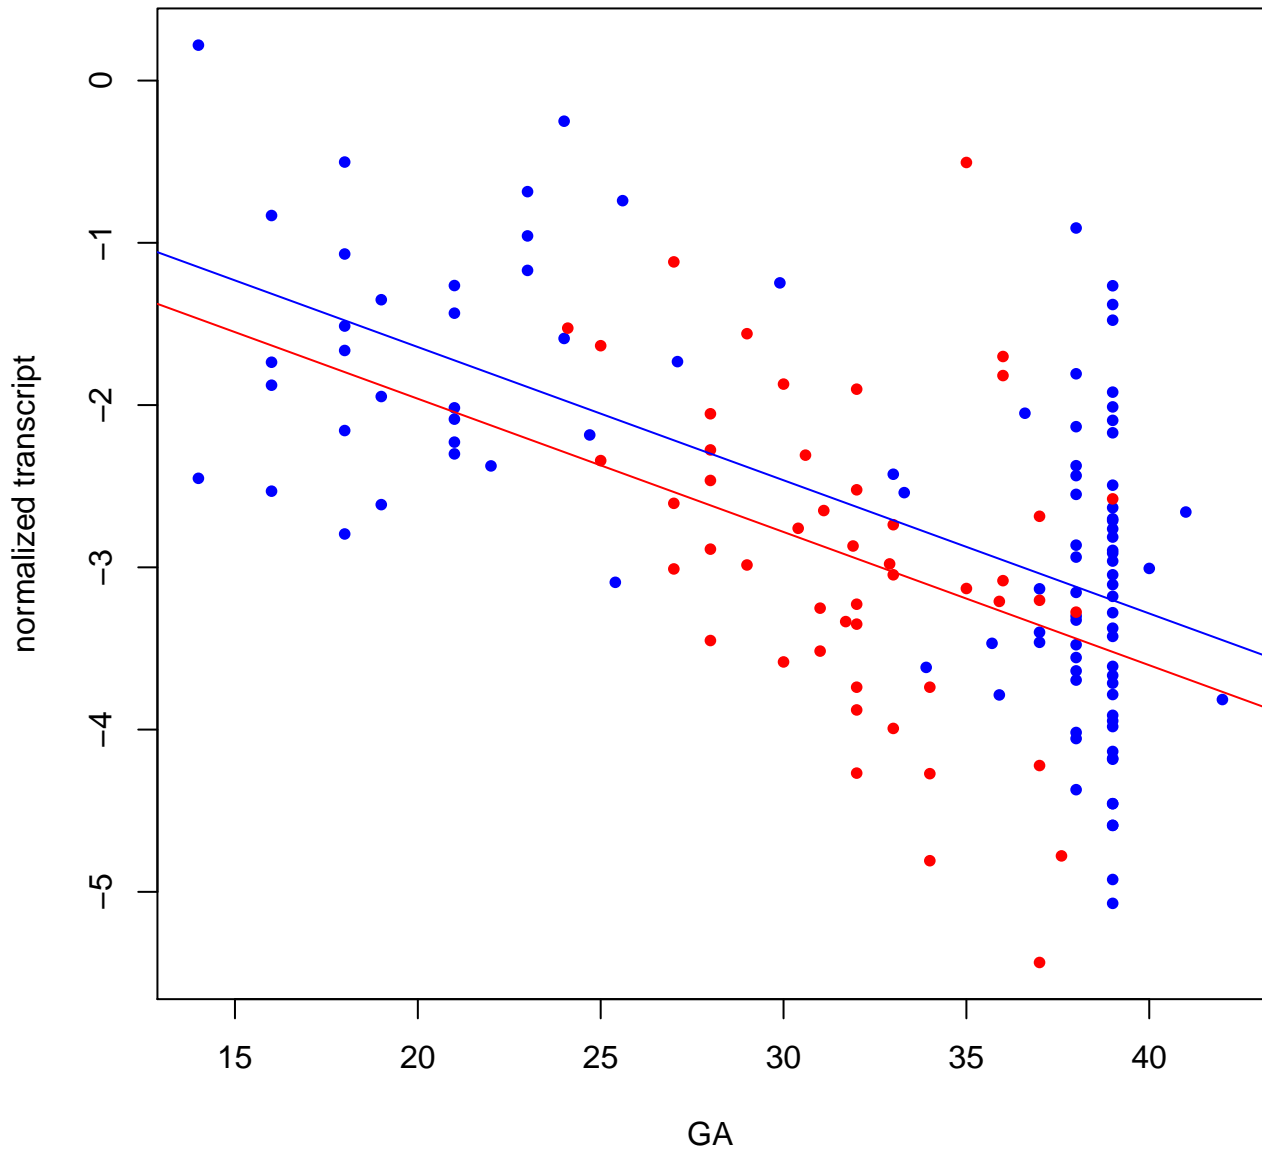

# 213864\_s\_at.1

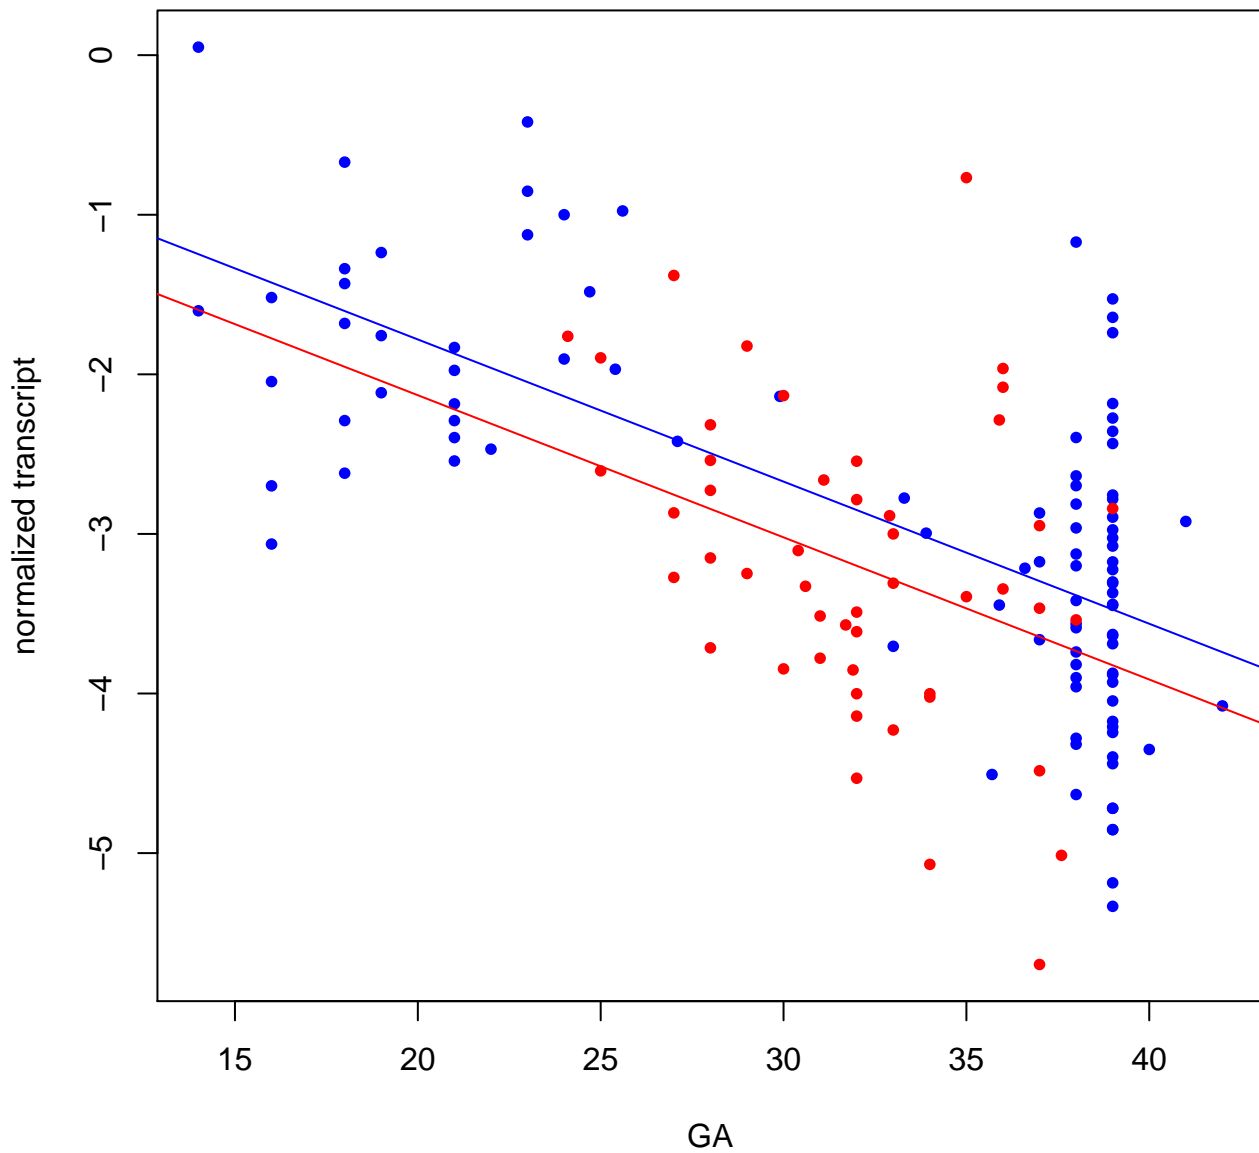

# 208752\_x\_at.1

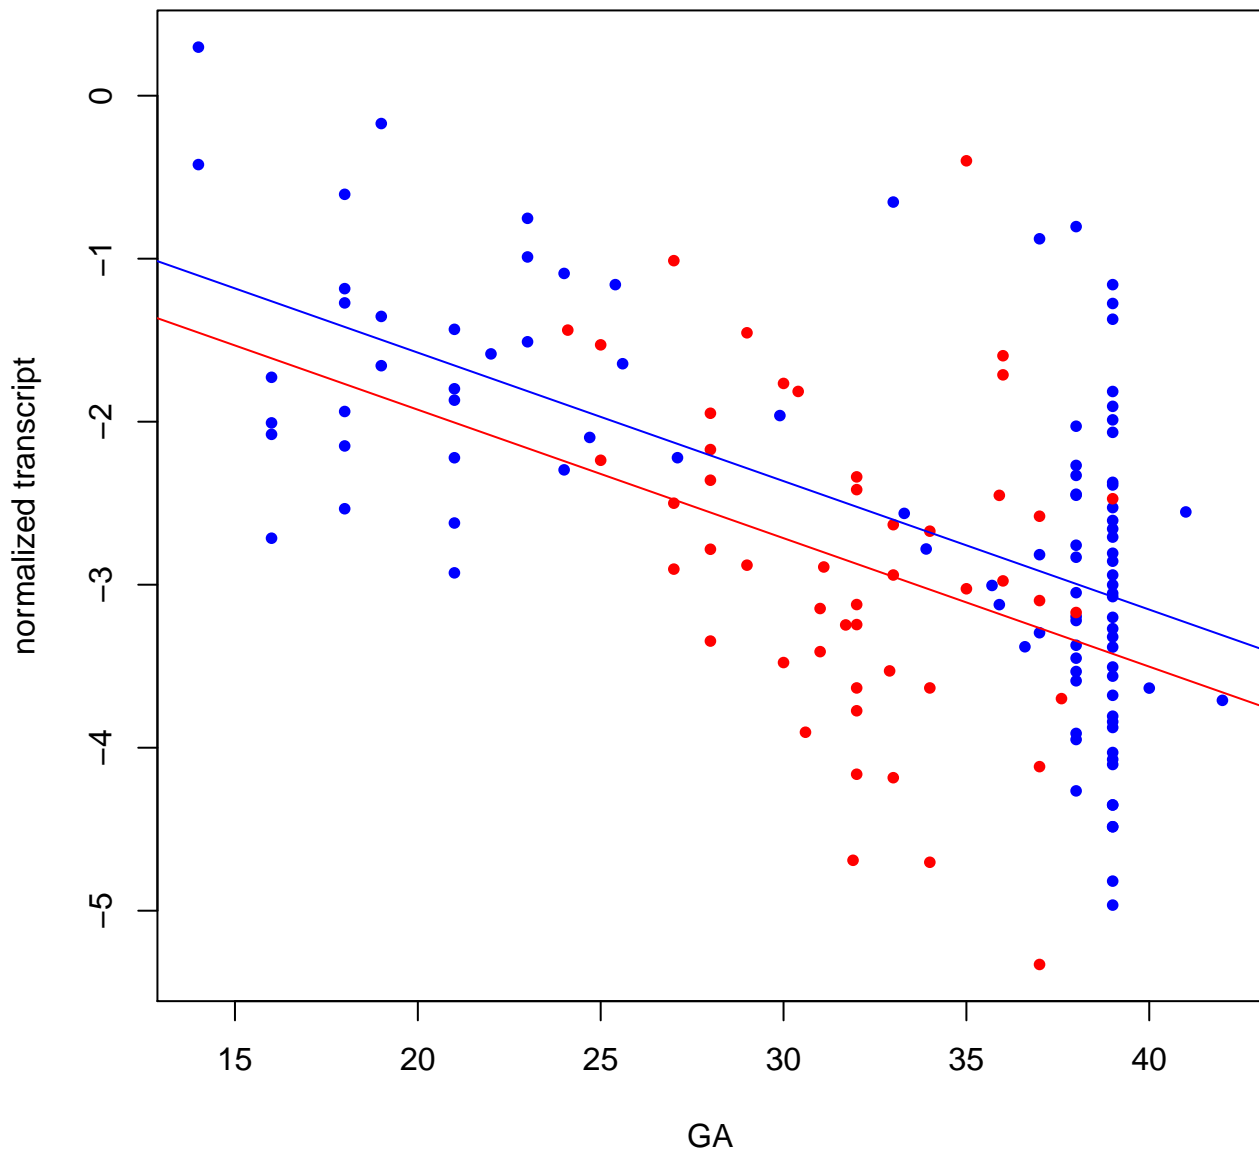

# 208753\_s\_at.1

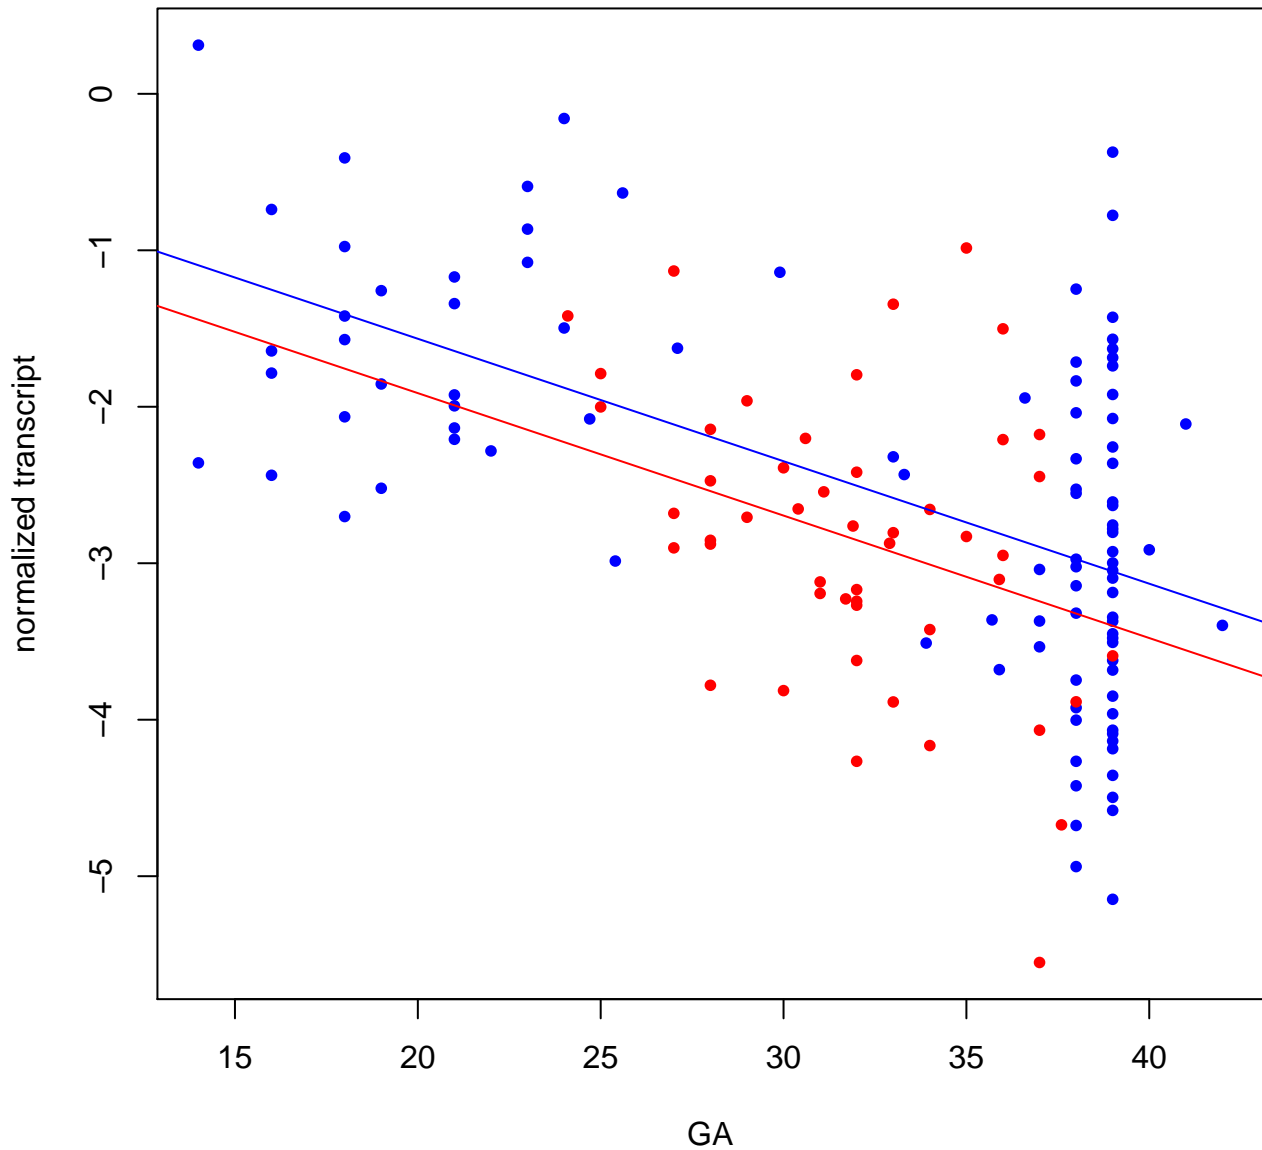

# 221028\_s\_at

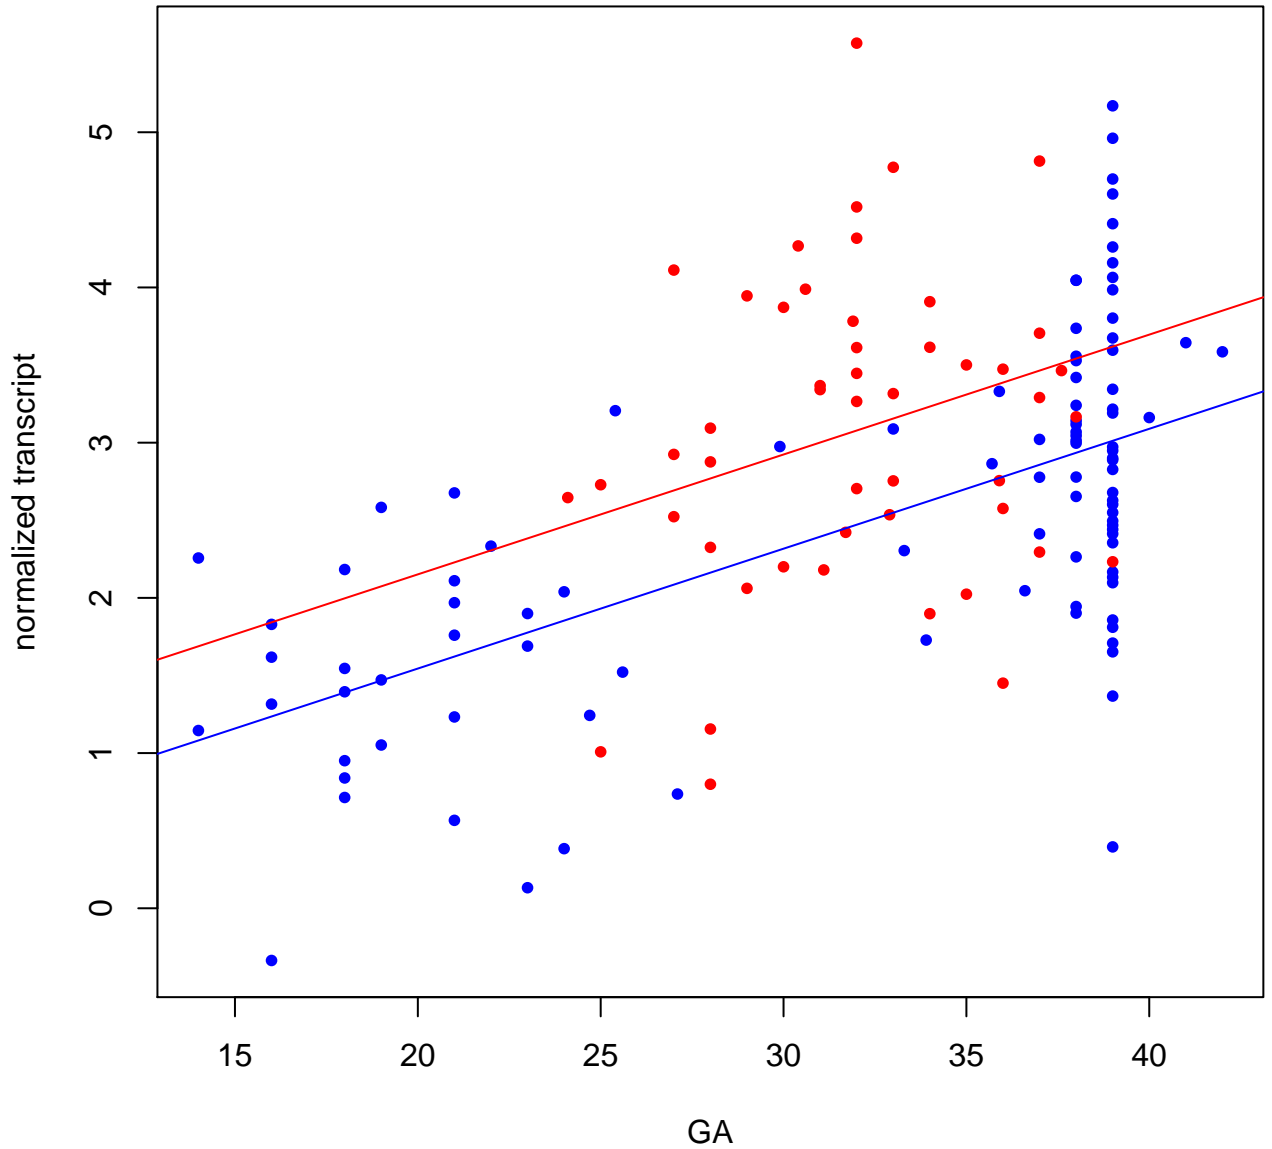





# 202965\_s\_at

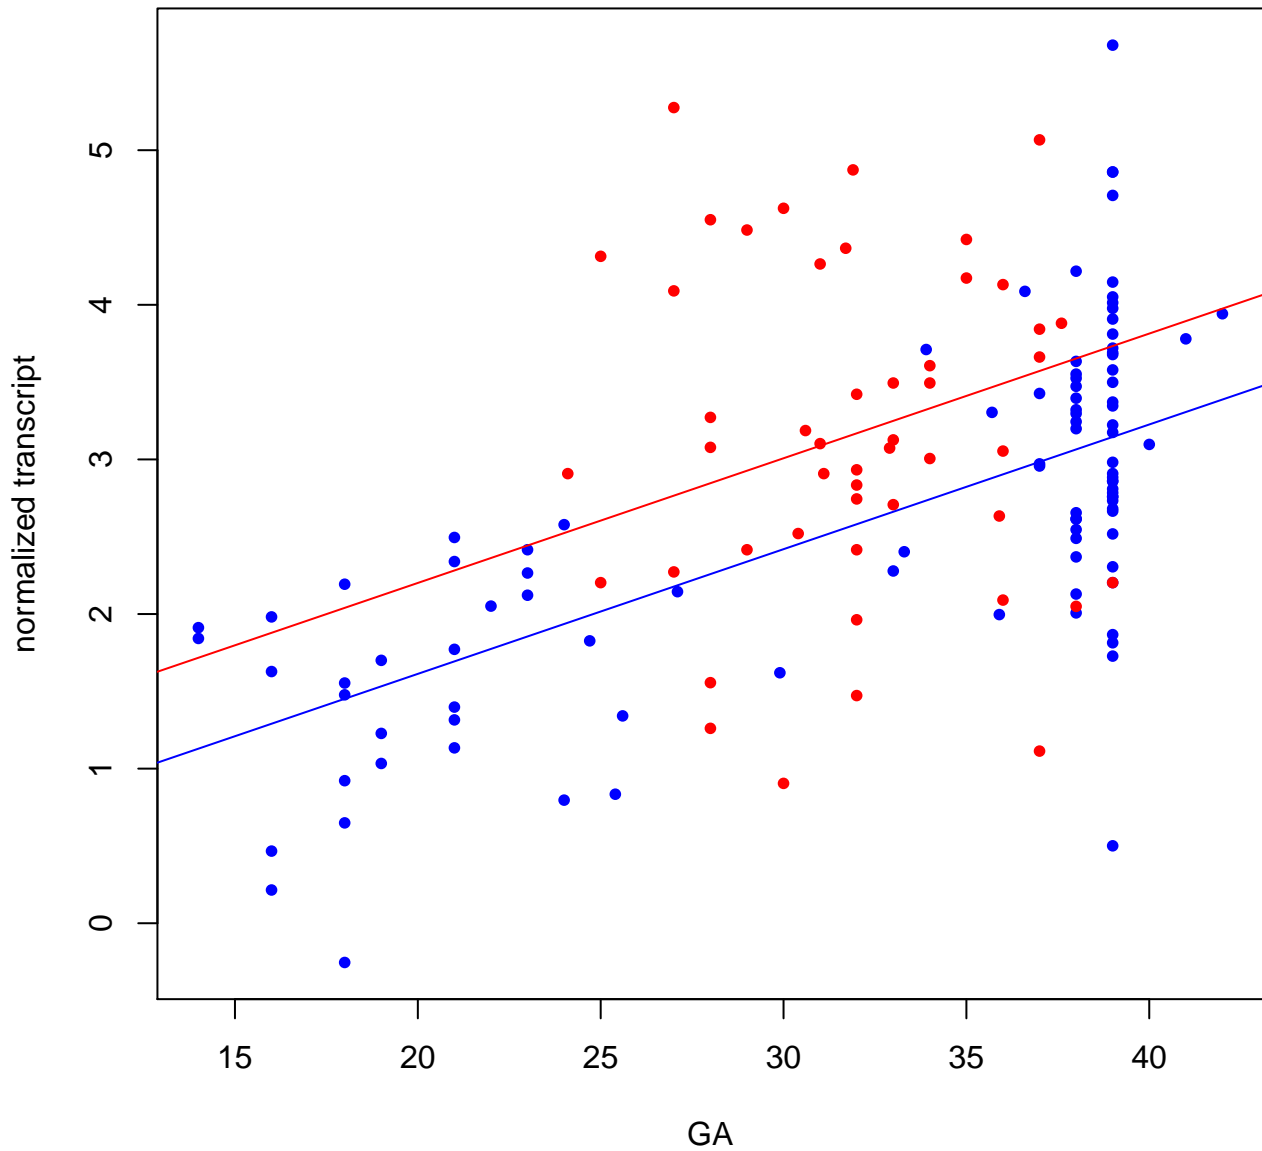

# 205846\_at.1

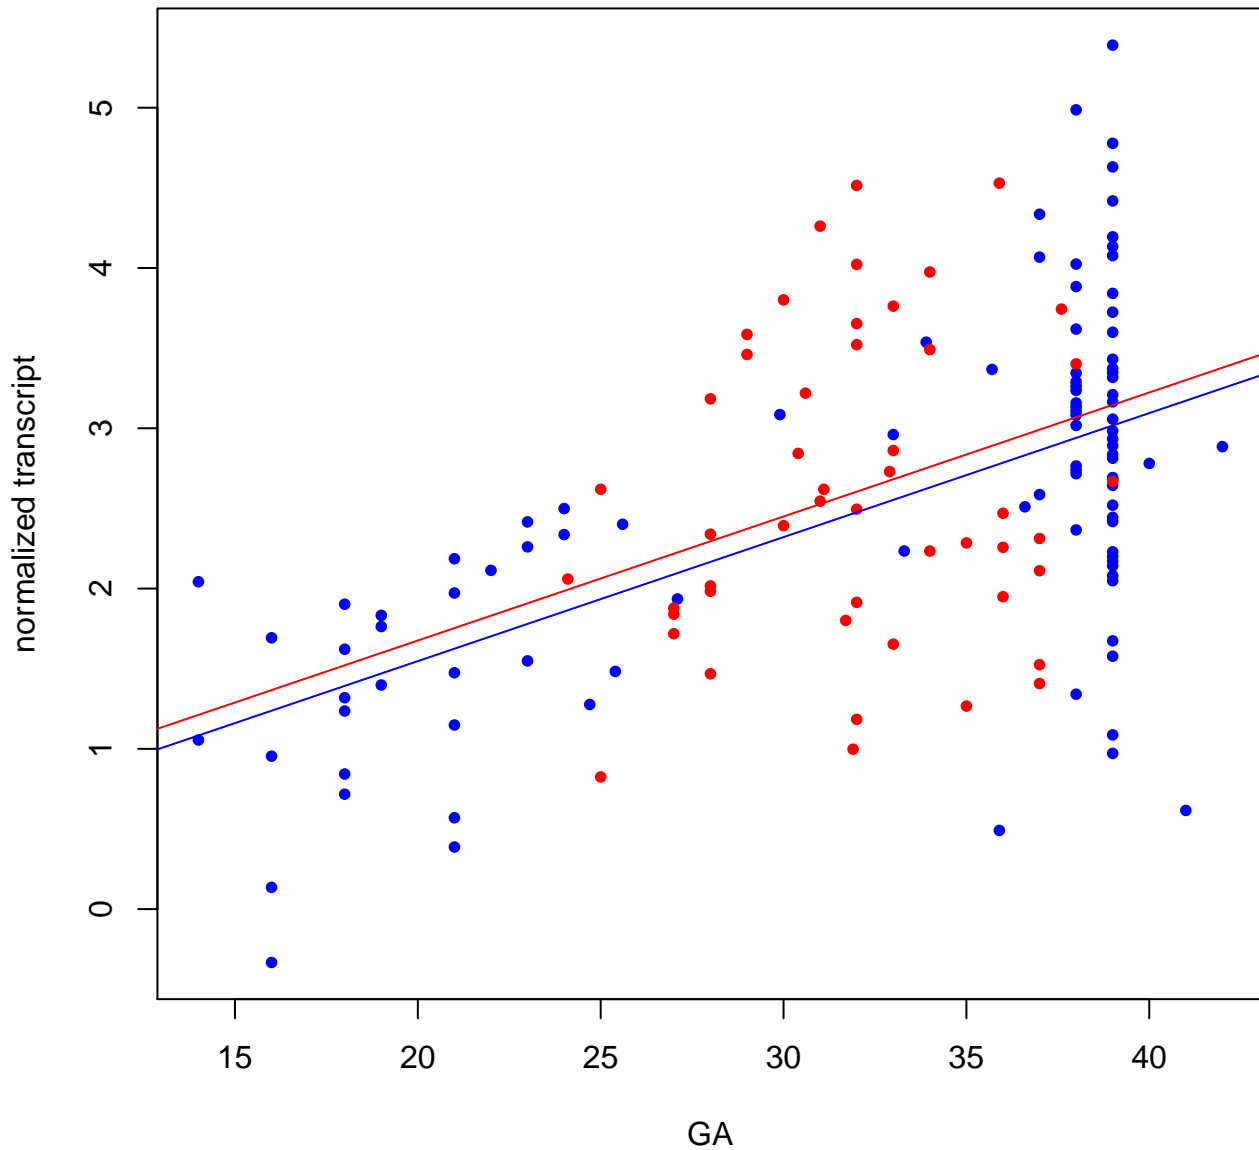

# 207172\_s\_at

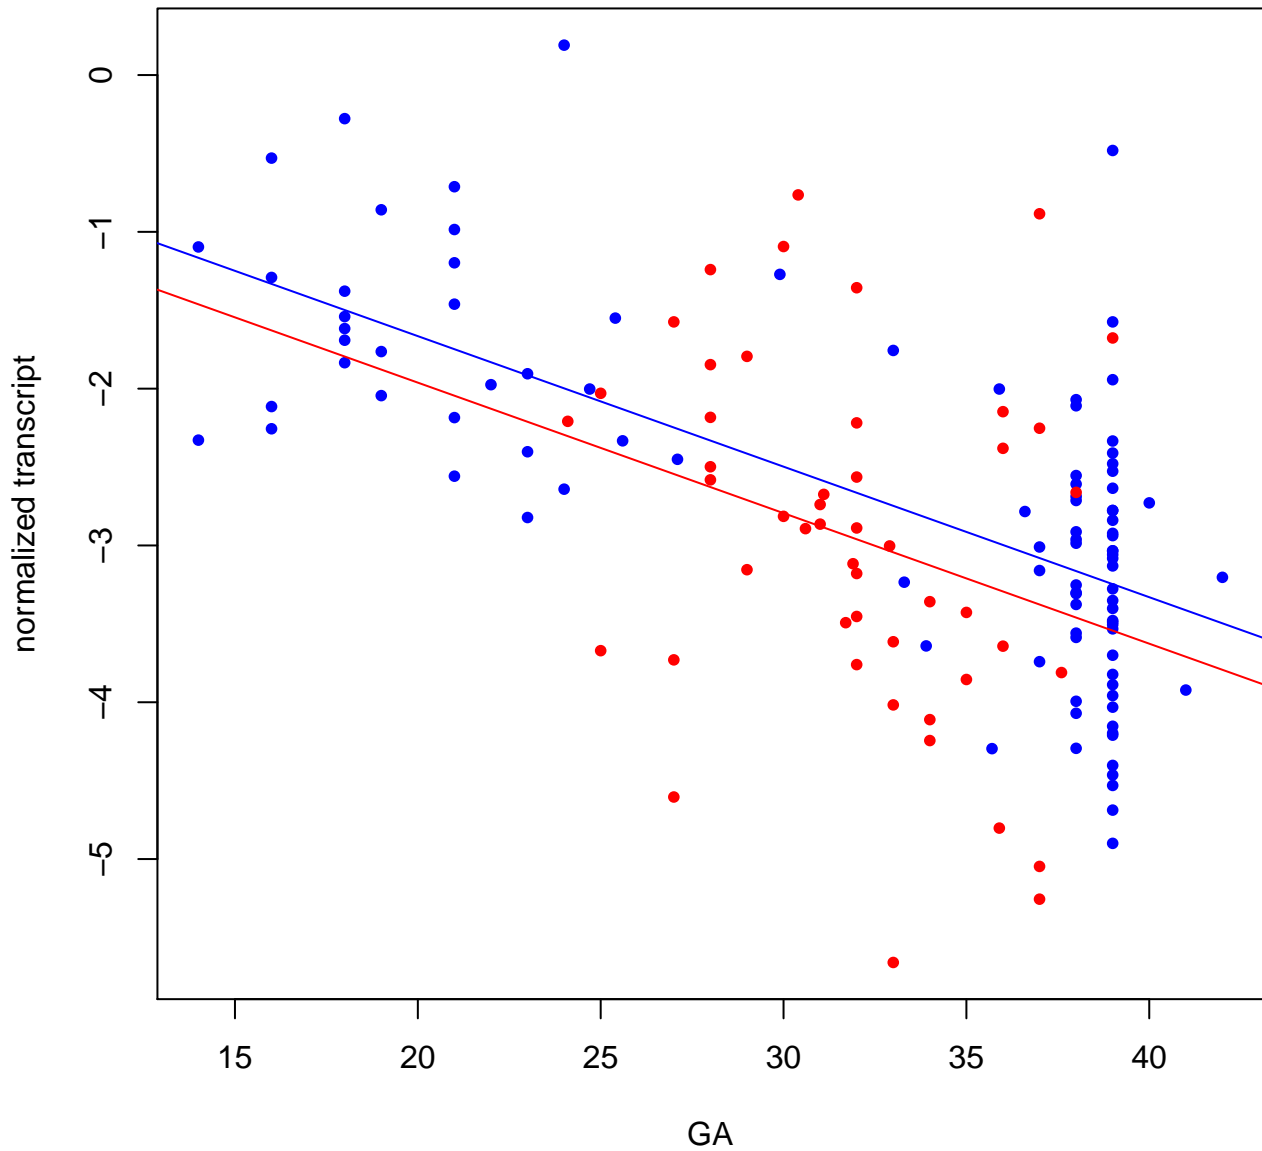

# 207173\_x\_at

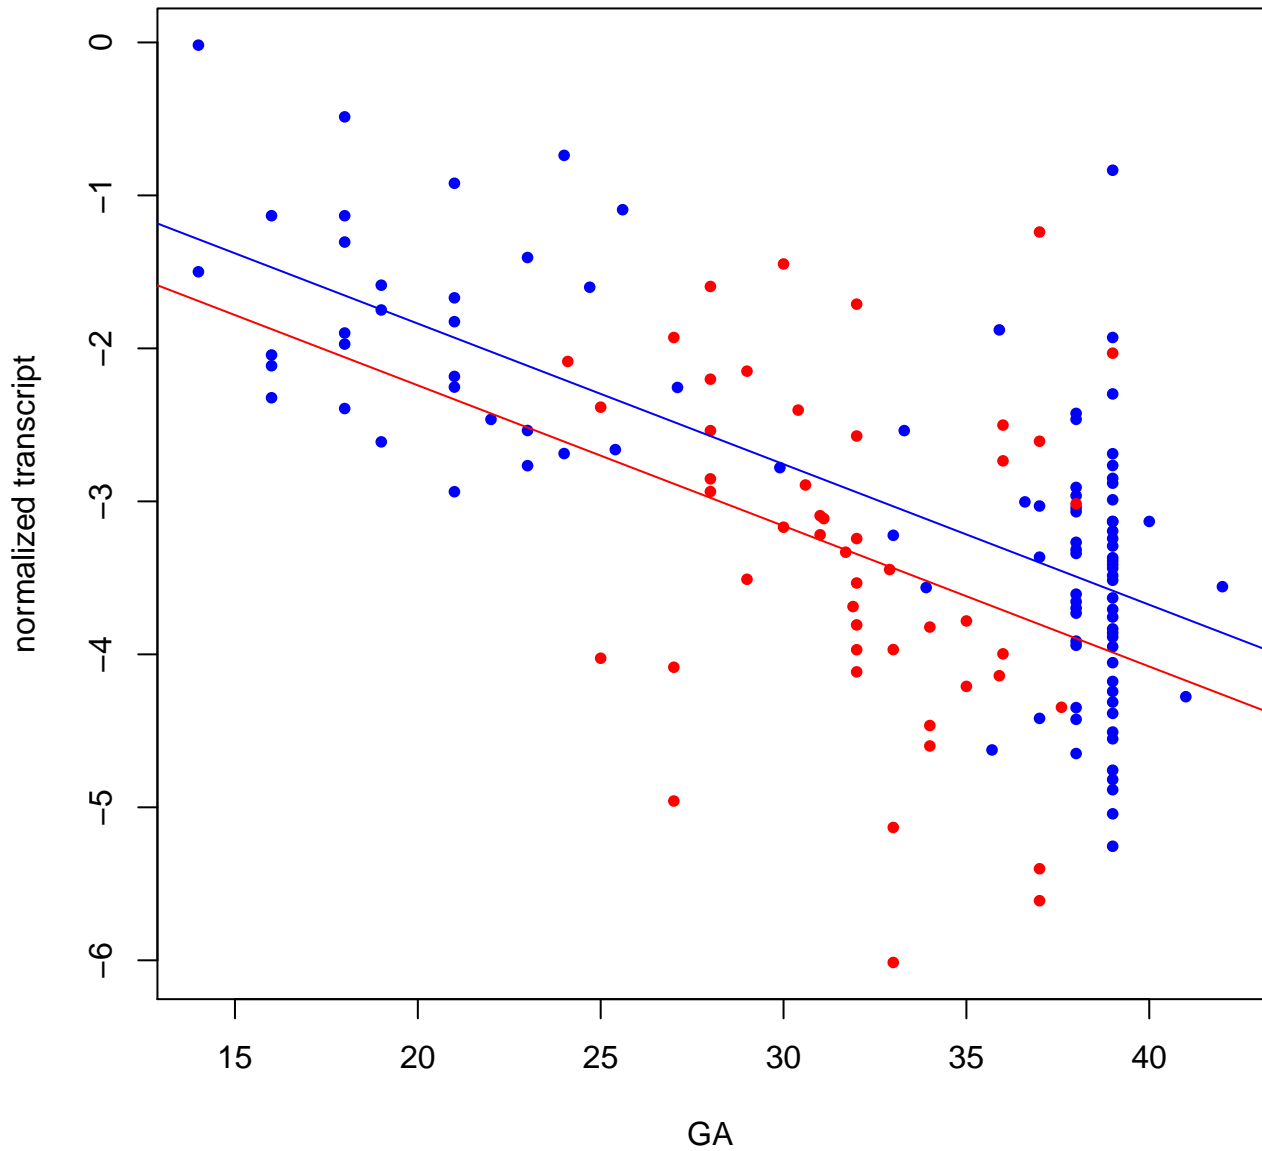

# 205026\_at

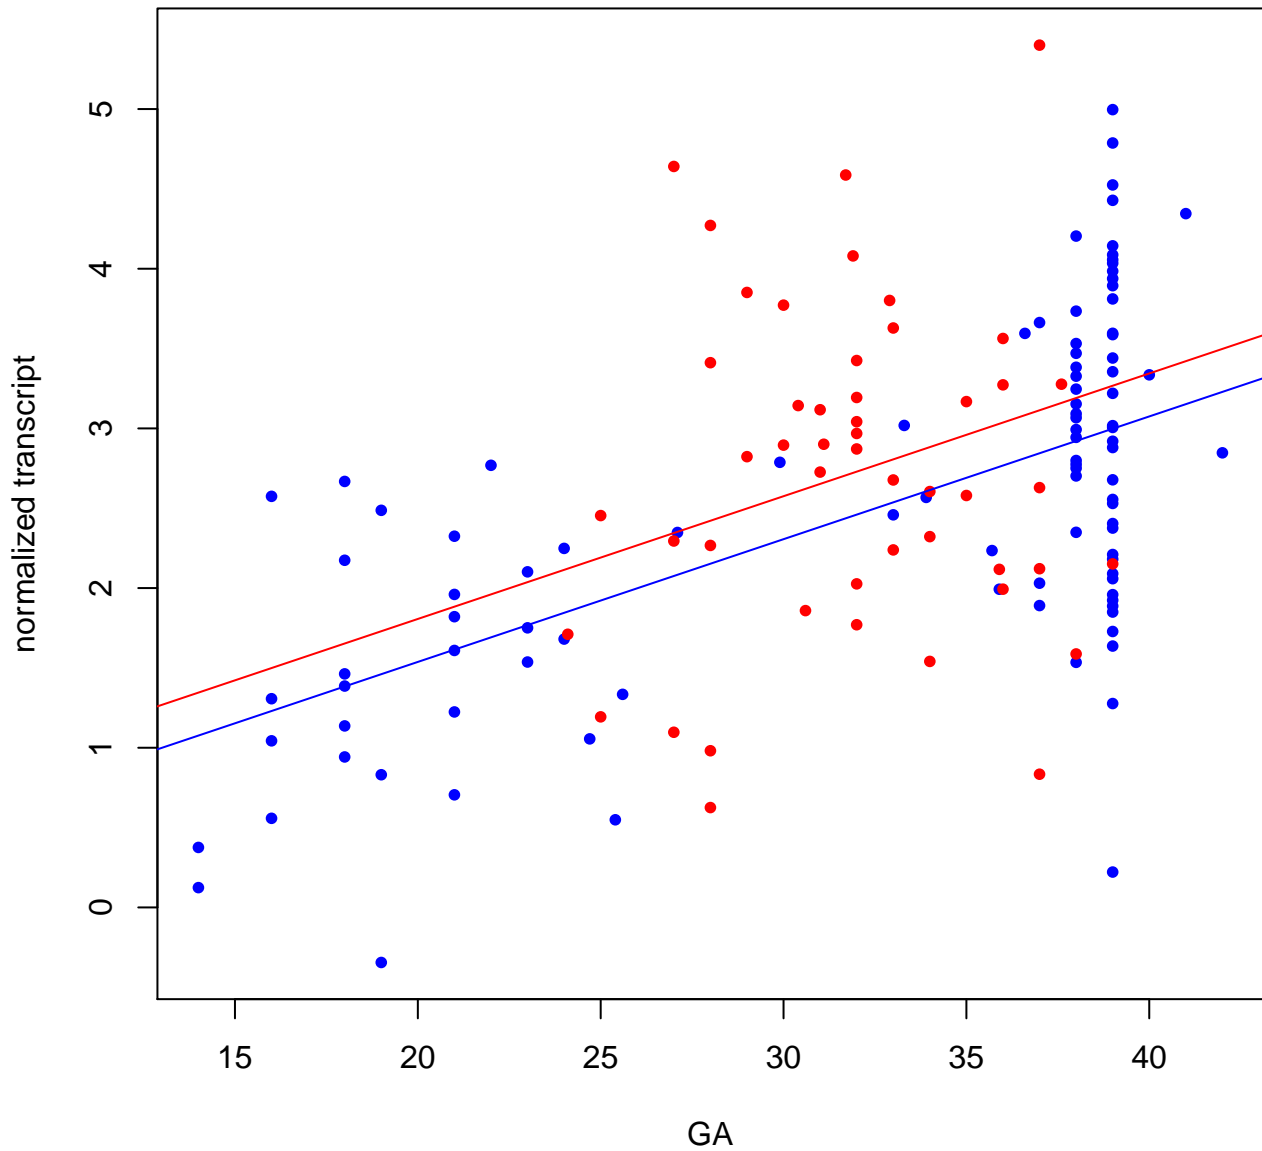

# 221813\_at

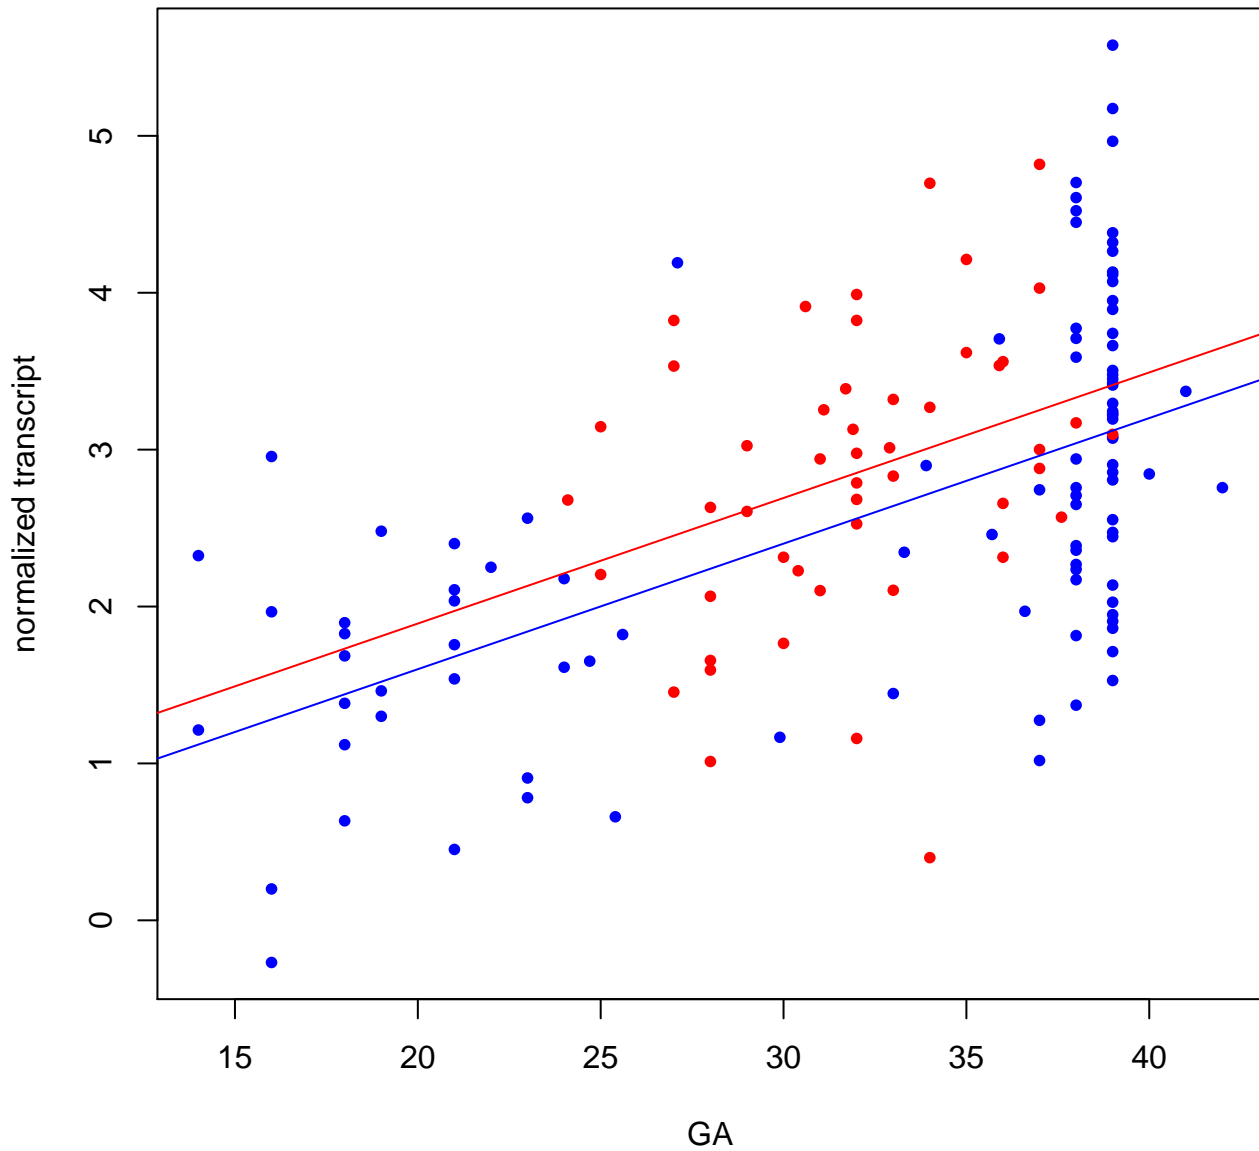

# 201041\_s\_at

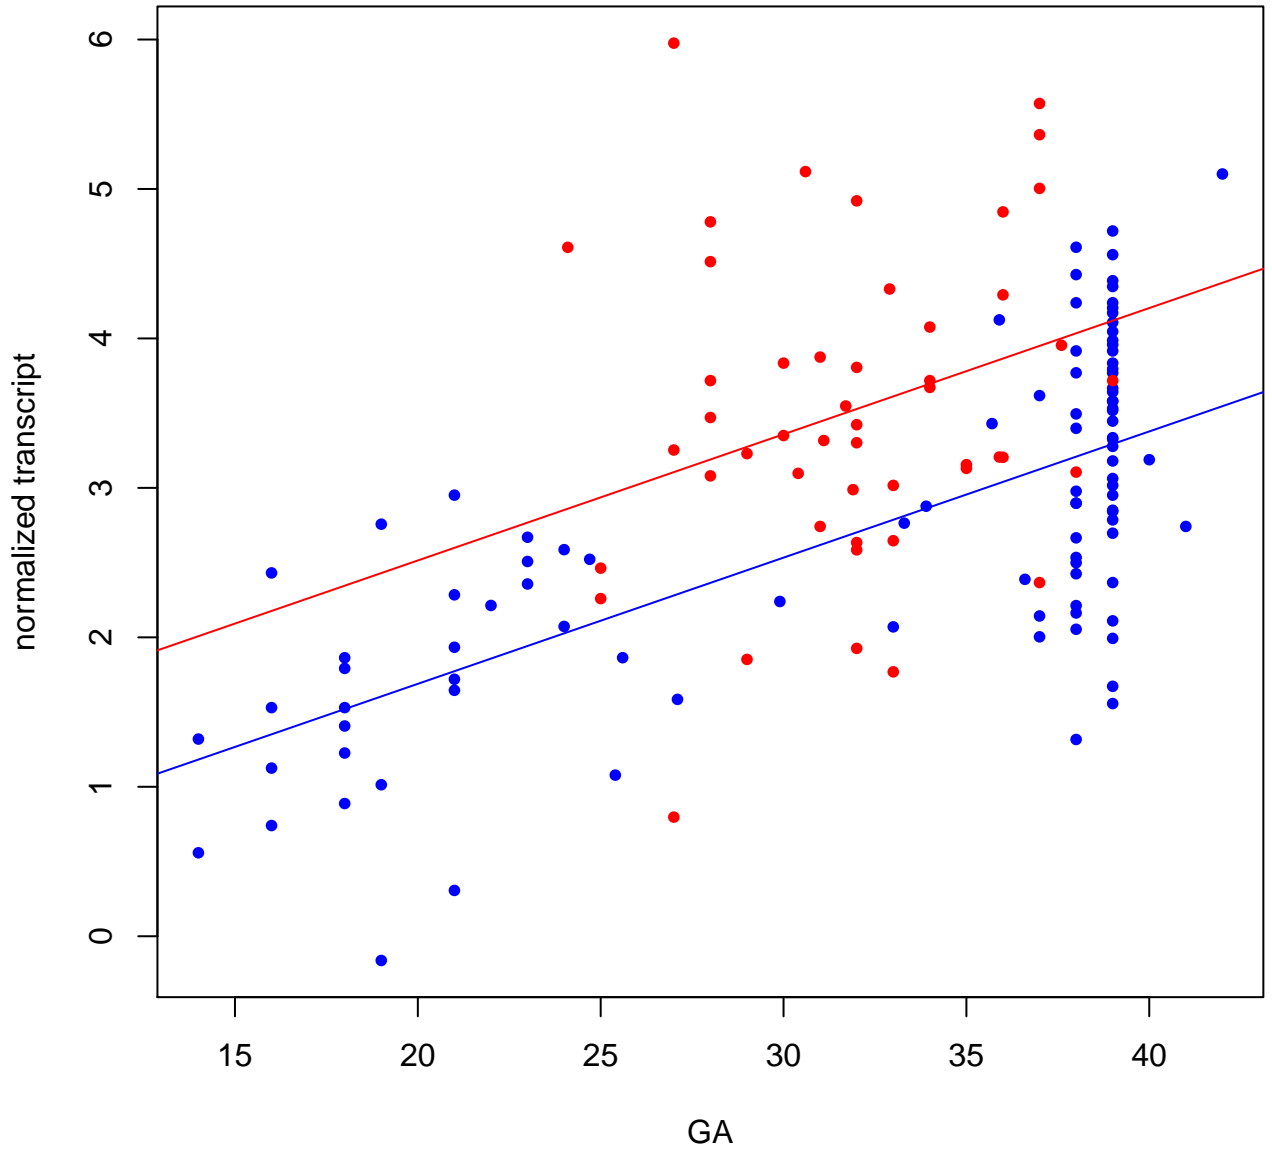

# 206210\_s\_at

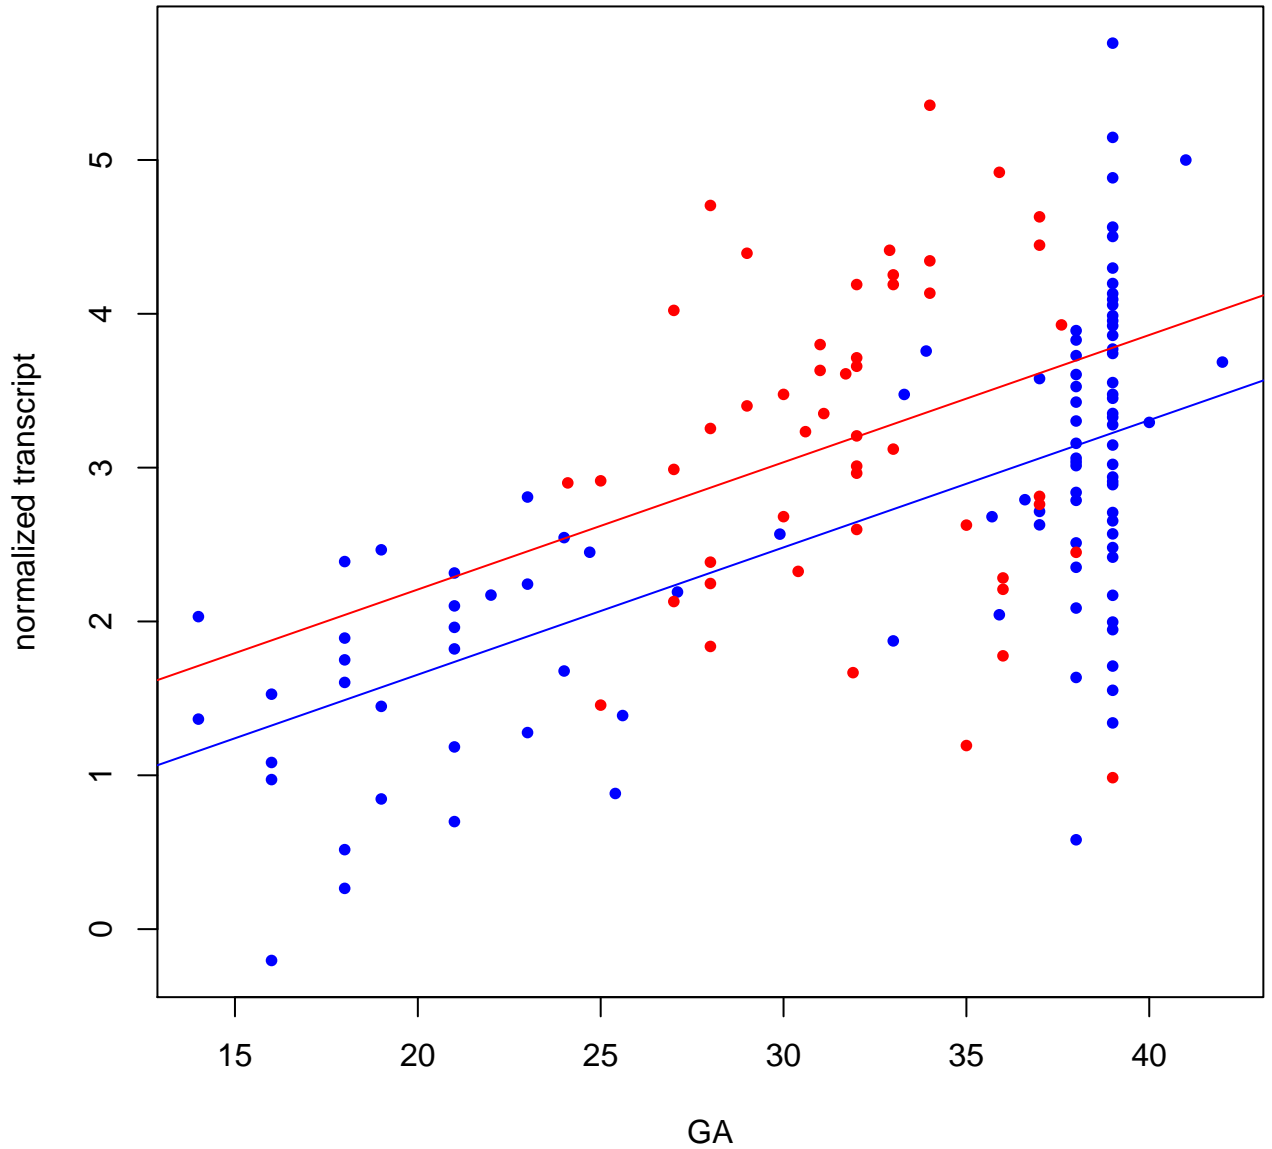





# 208962\_s\_at

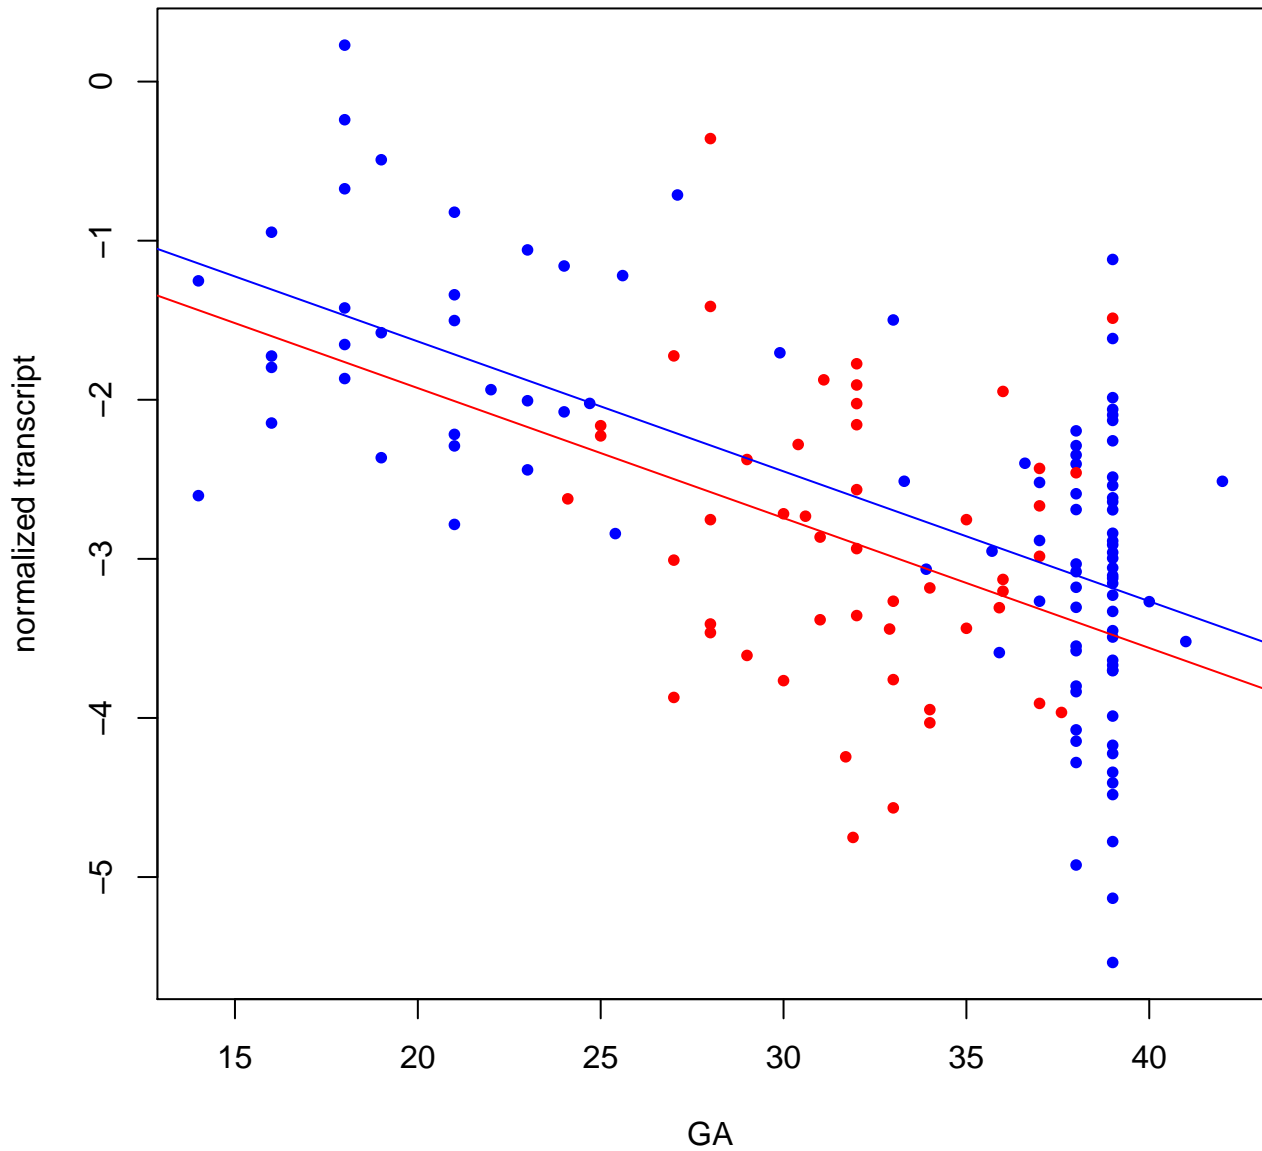

# 209146\_at

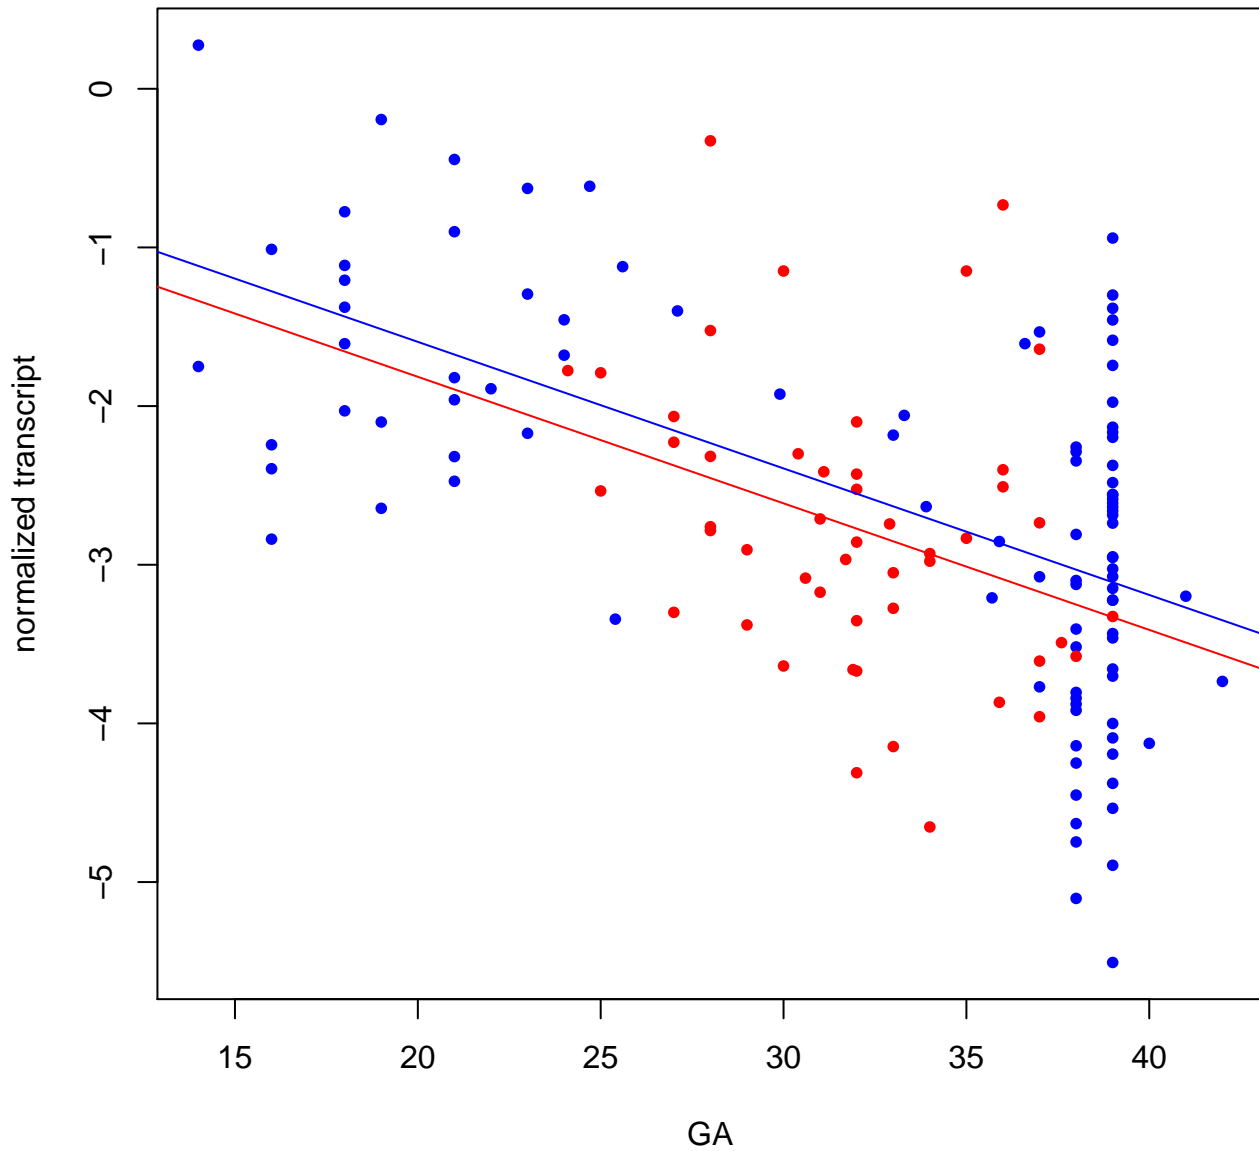

# 209146\_at.1

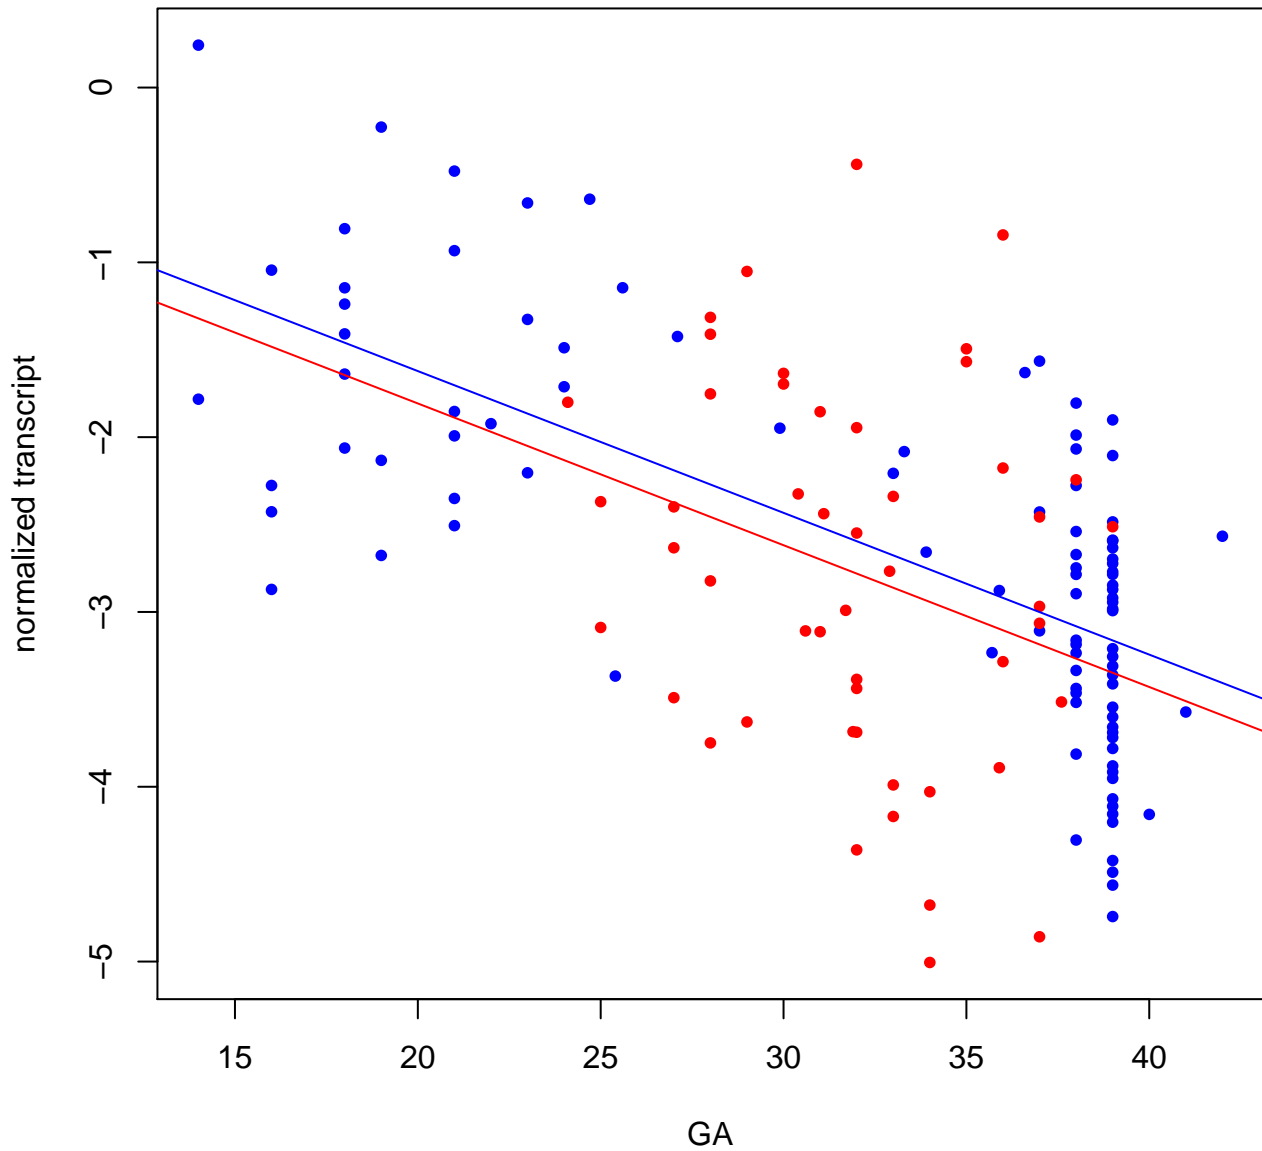



# 205629\_s\_at

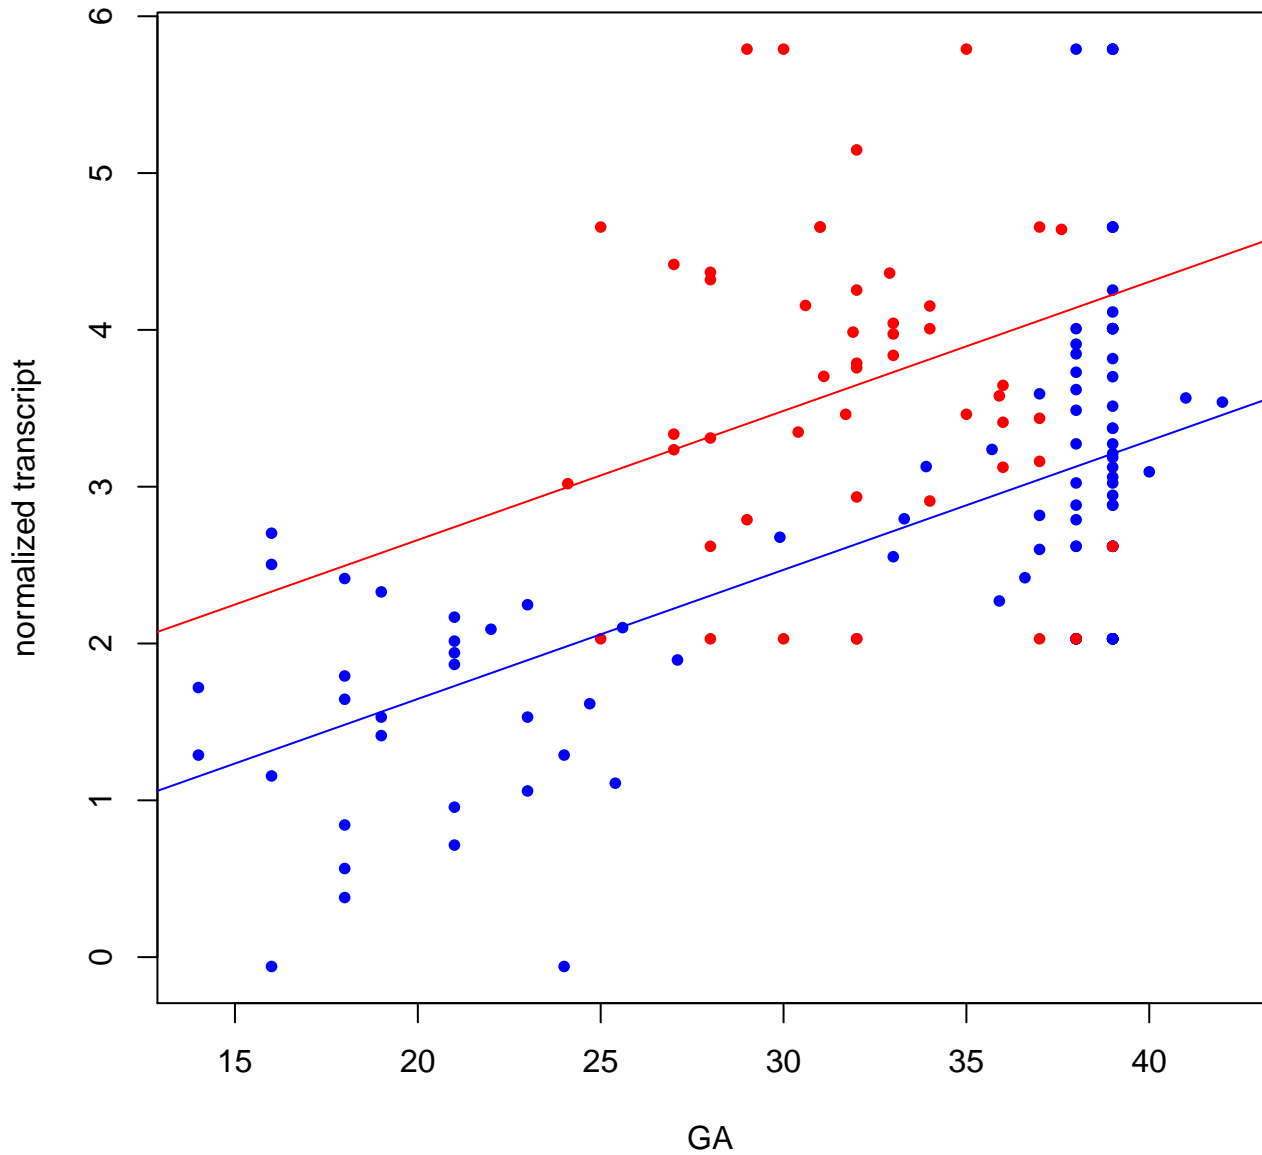

# 203980\_at

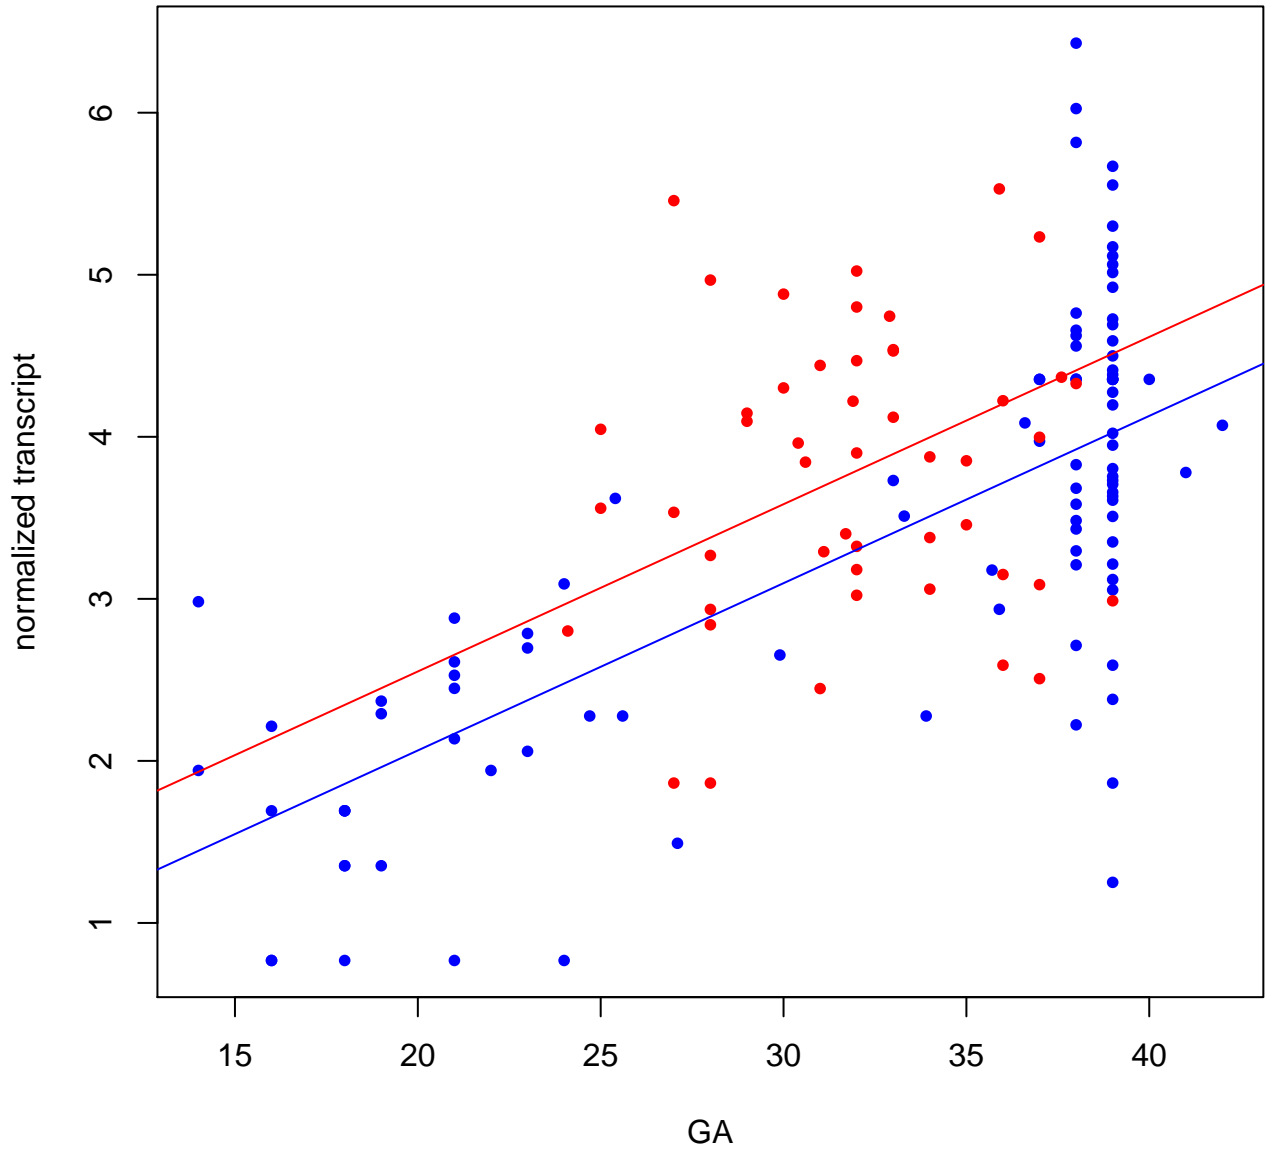

# 209875\_s\_at

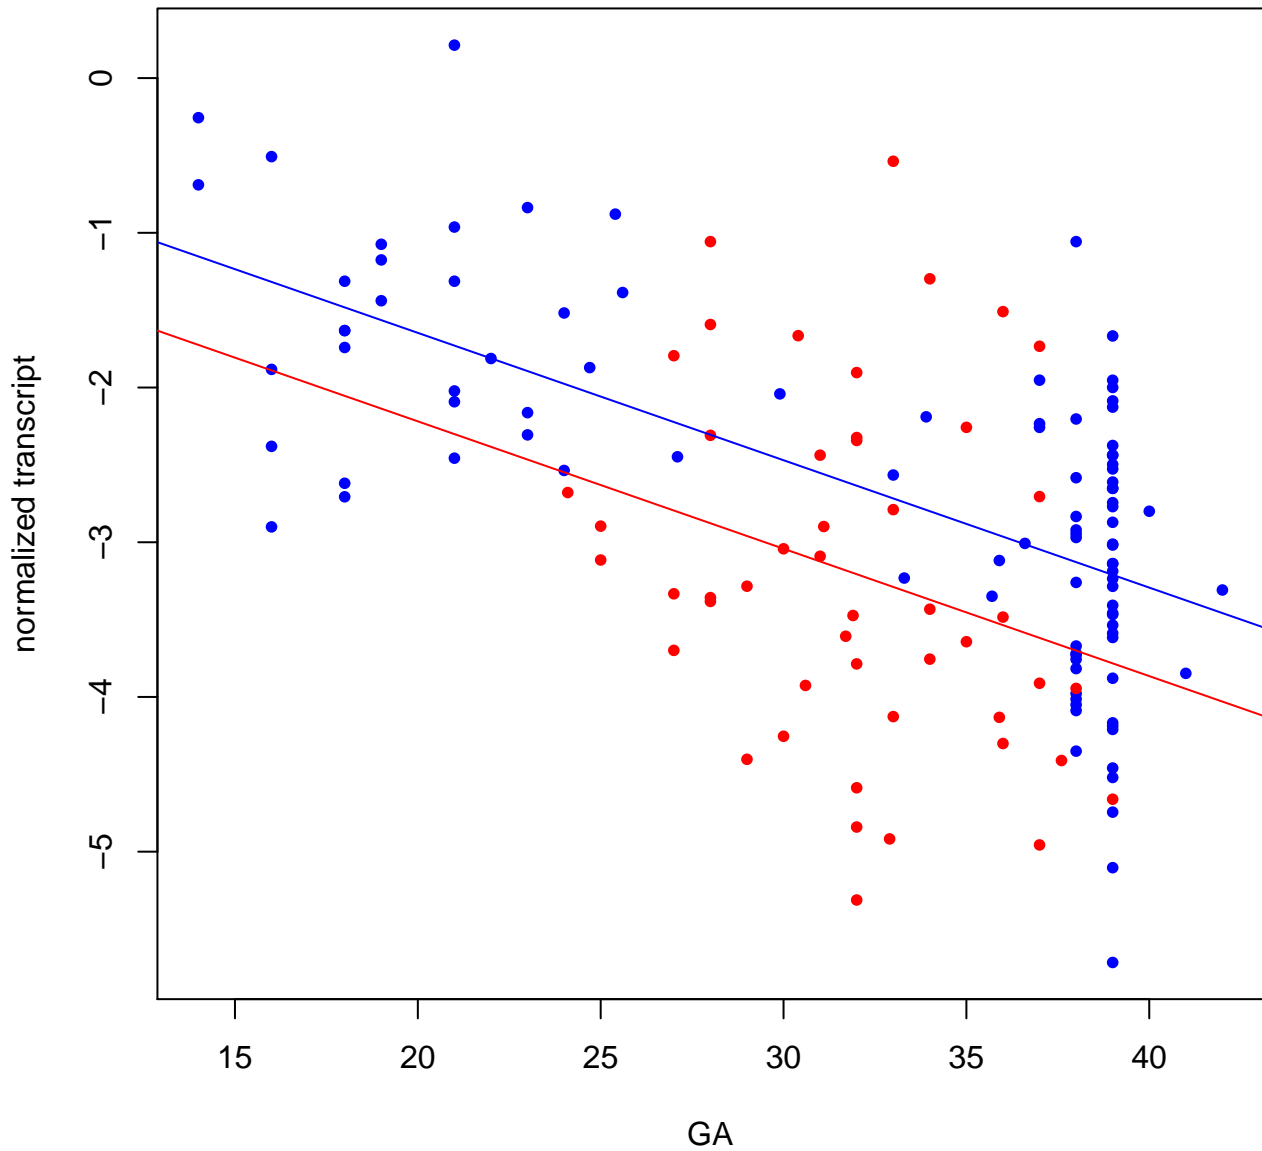



# 202068\_s\_at

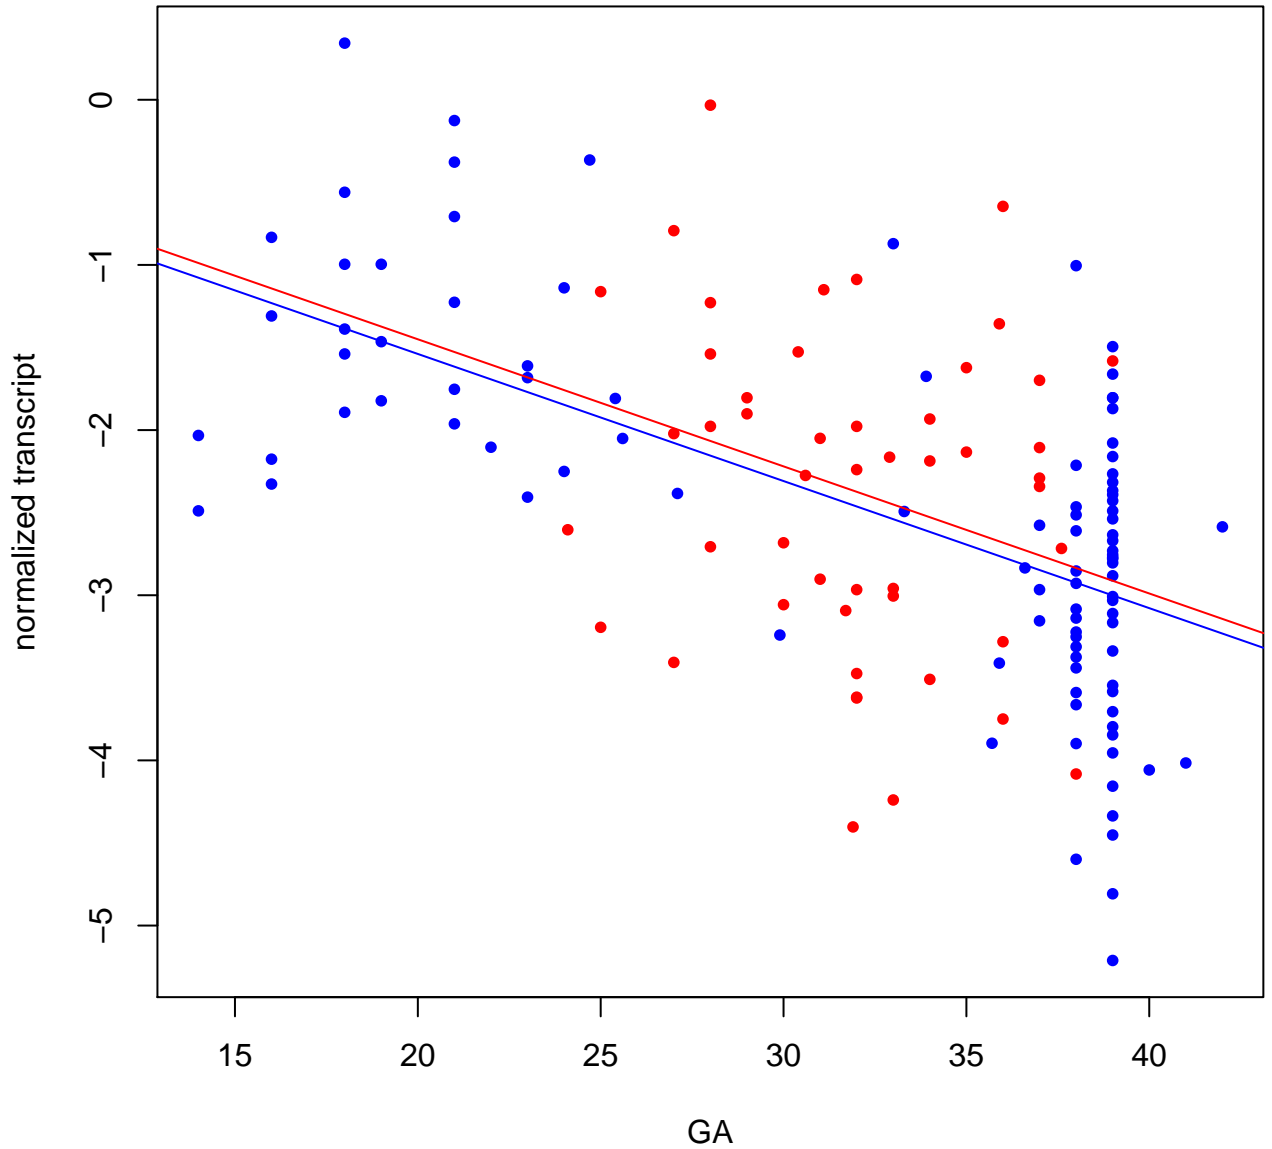

# 217892\_s\_at

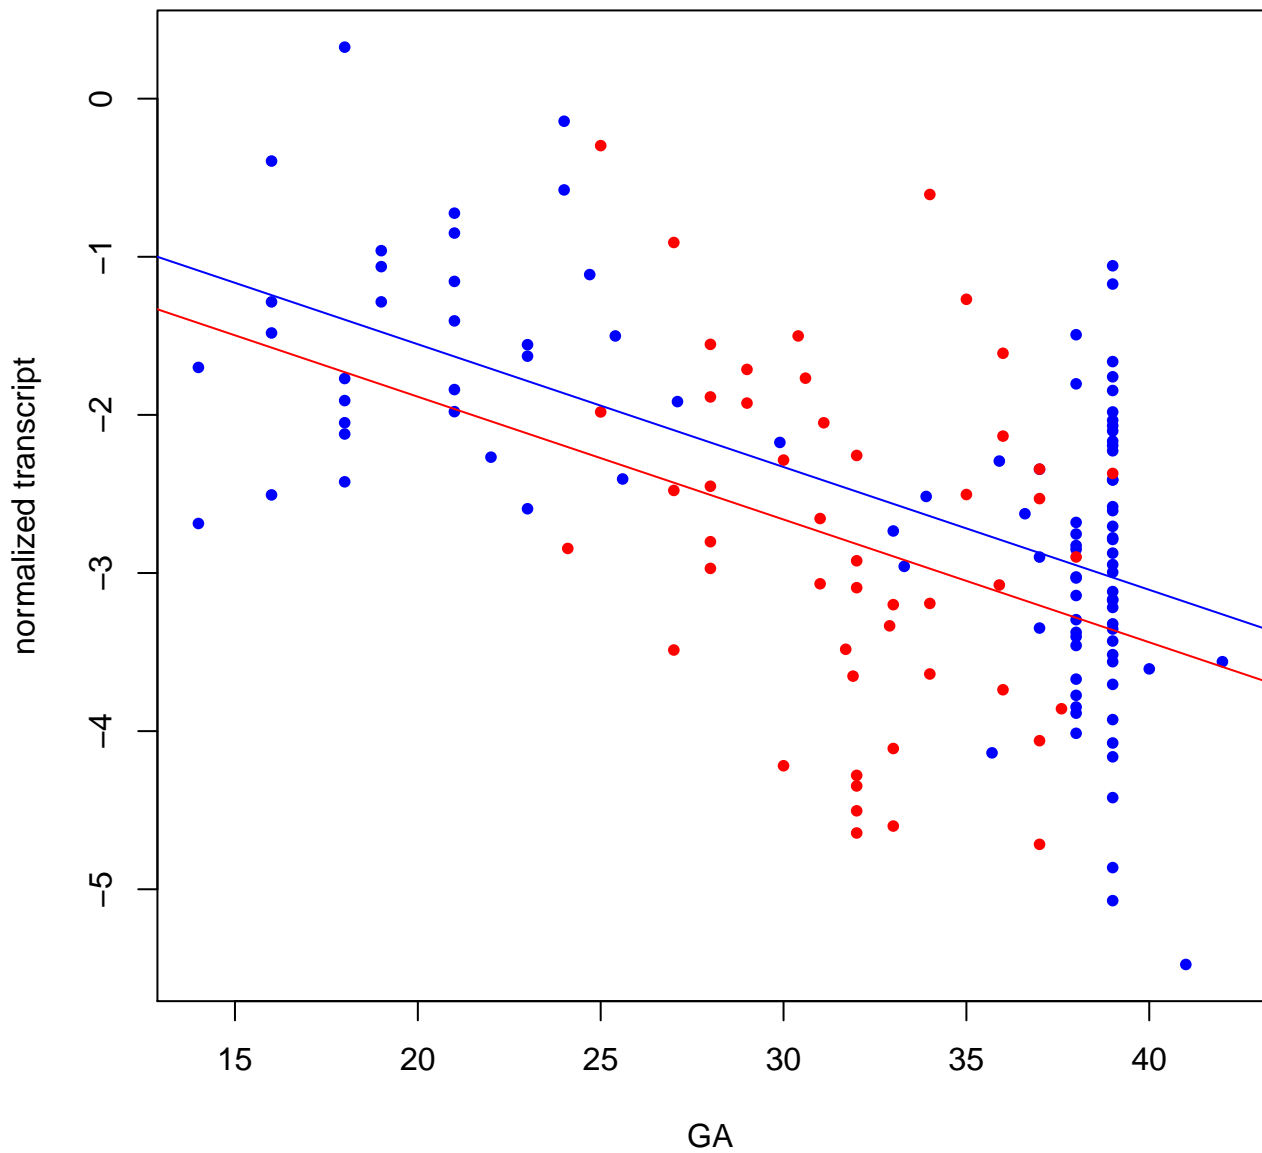

# 202565\_s\_at

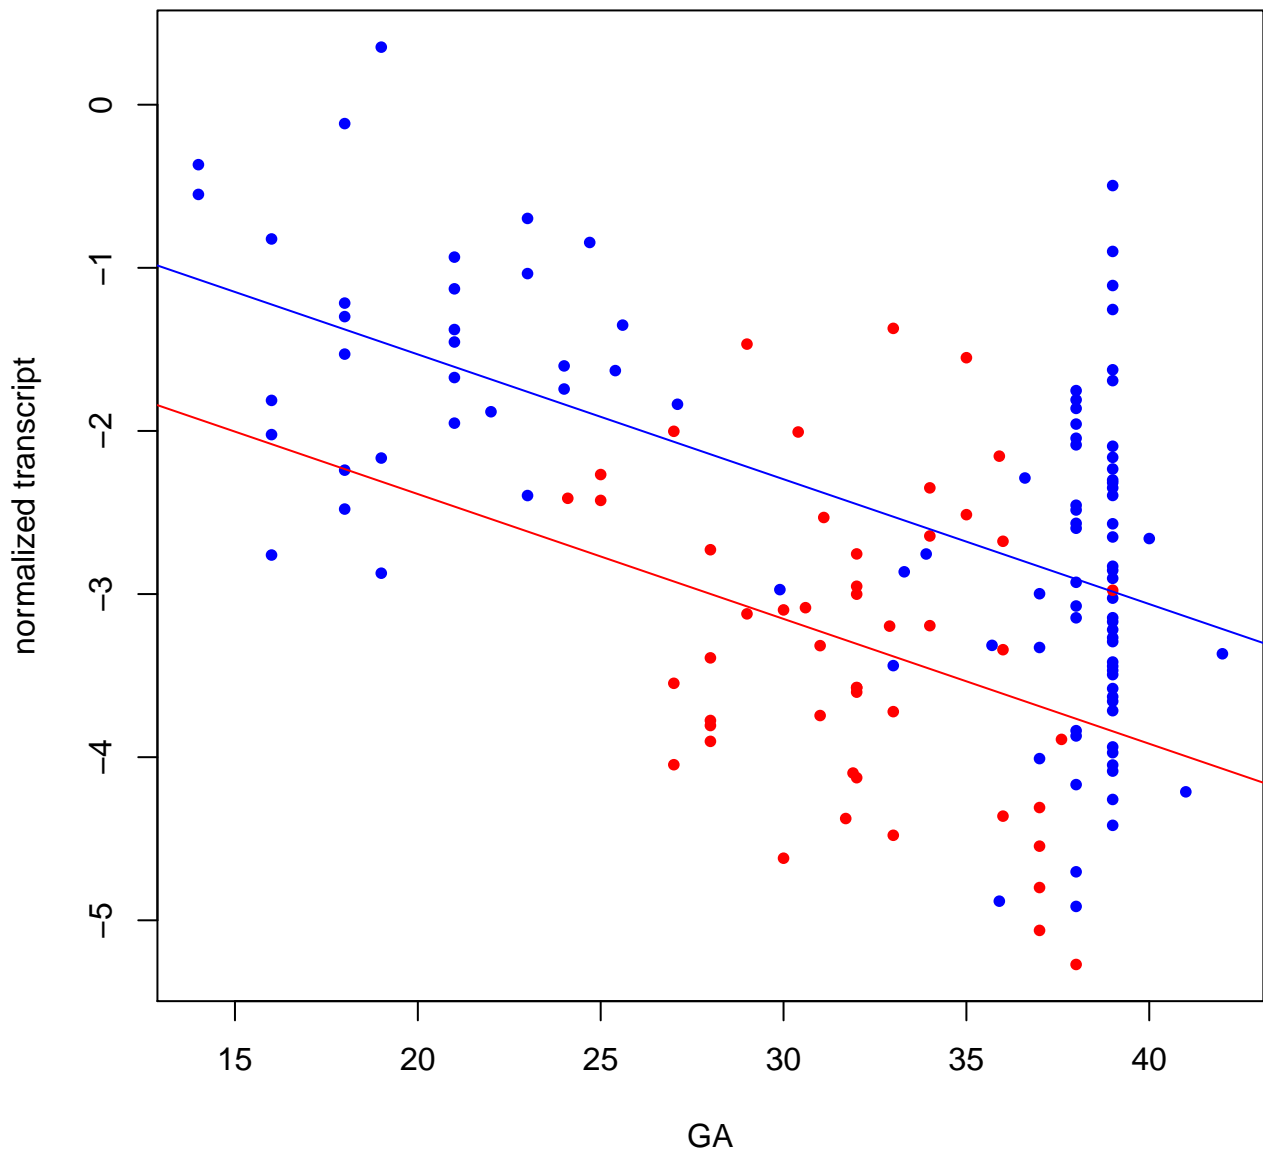



# 204017\_at

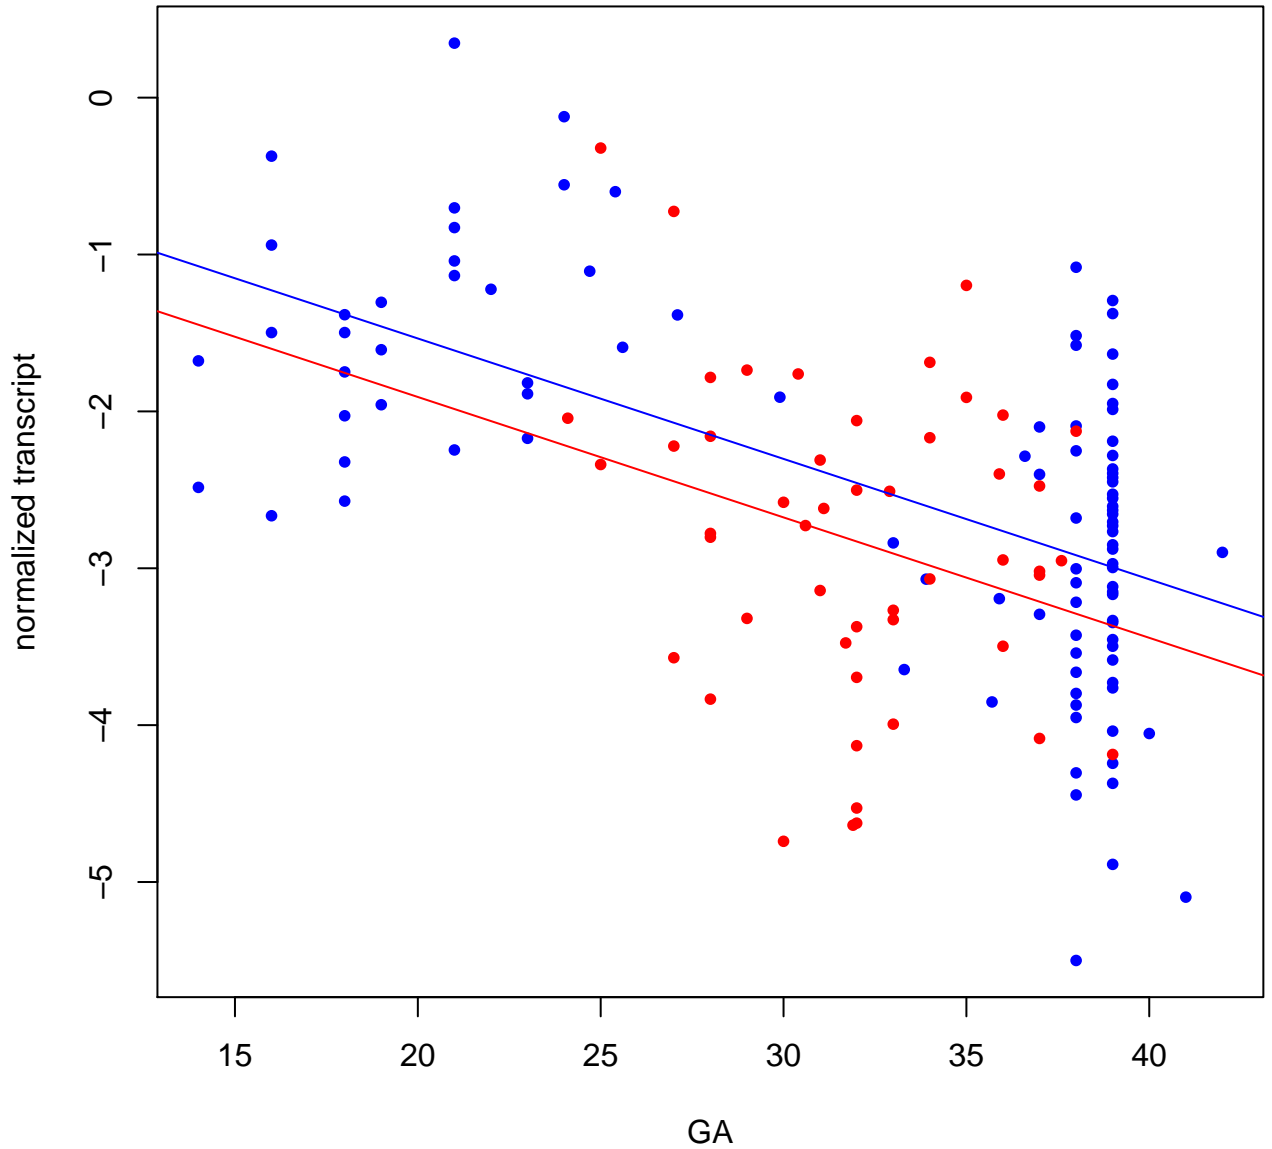

# 204256\_at

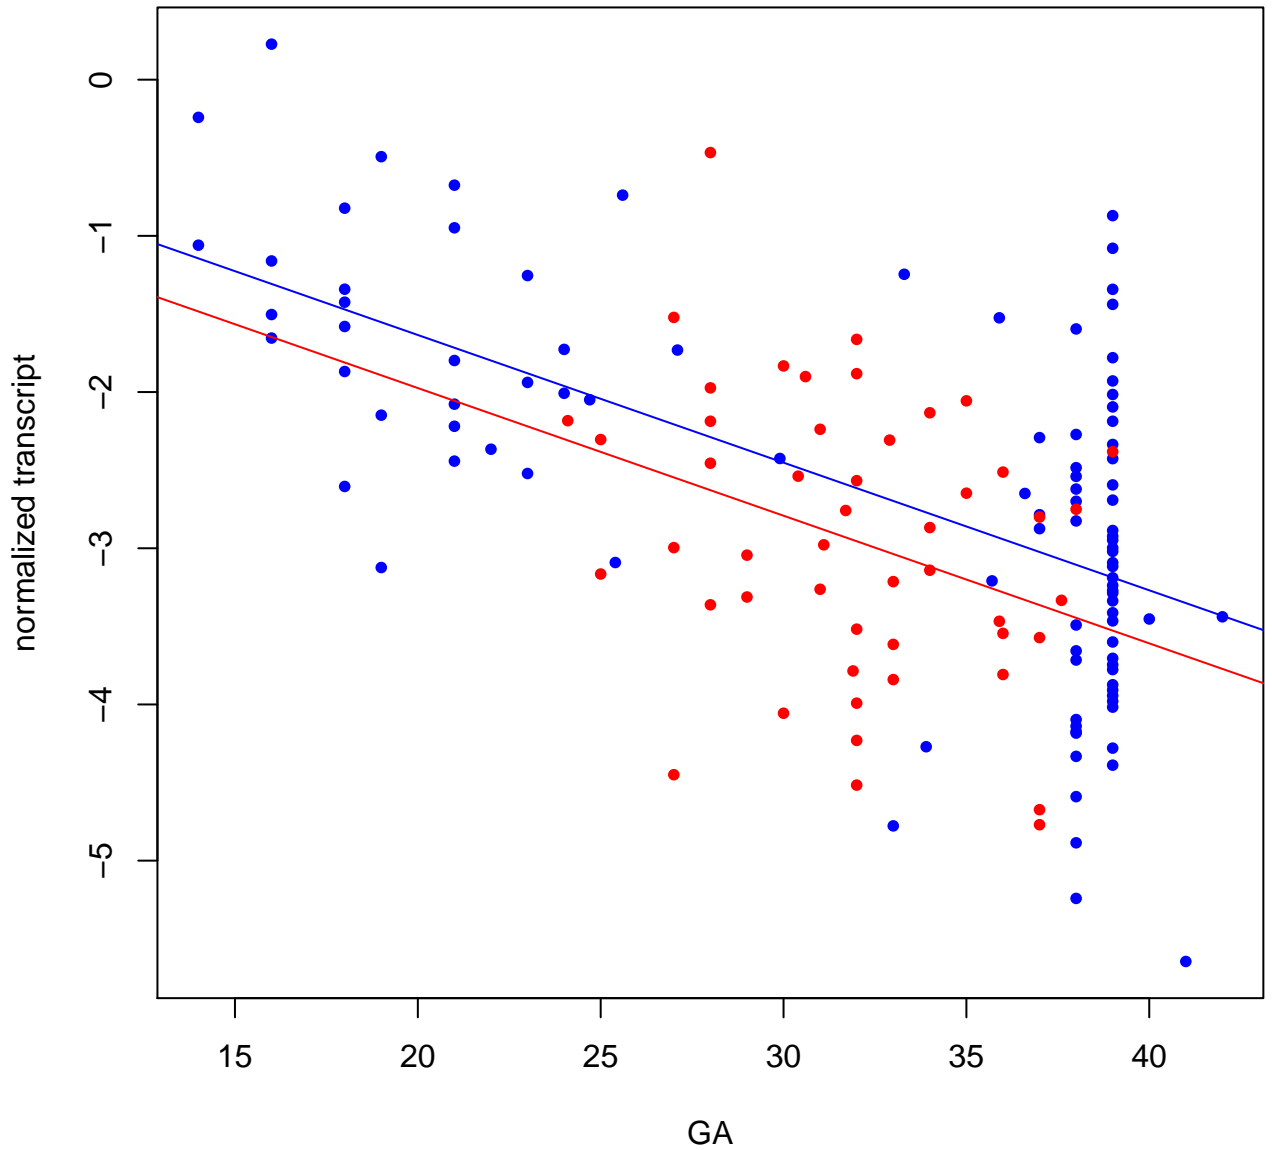







# 219371\_s\_at

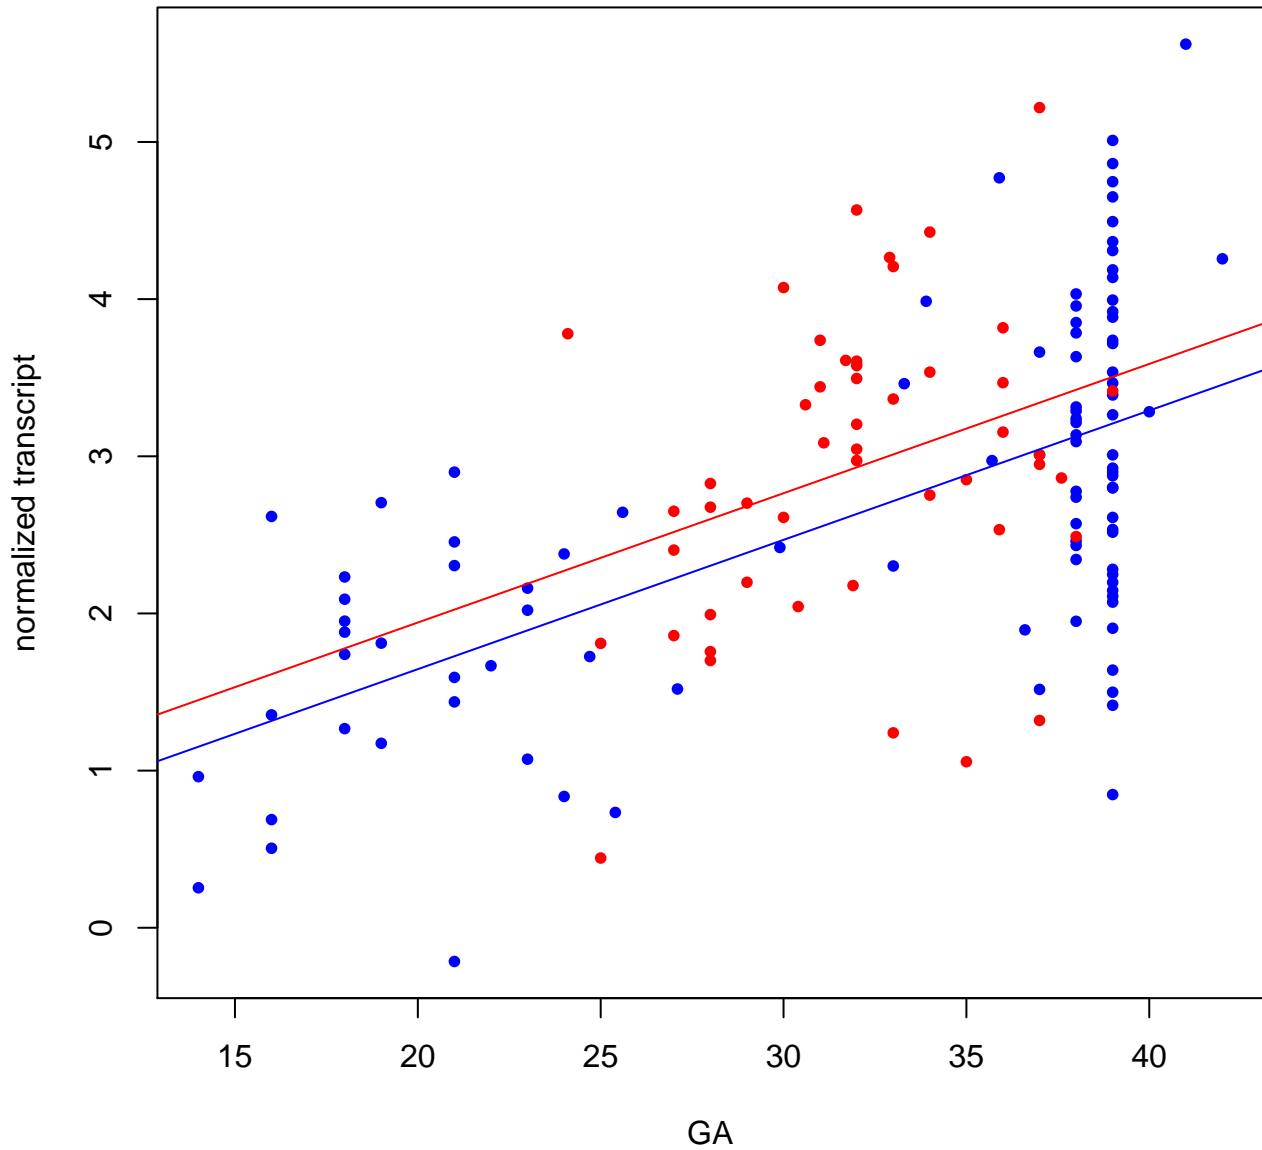

# 200629\_at

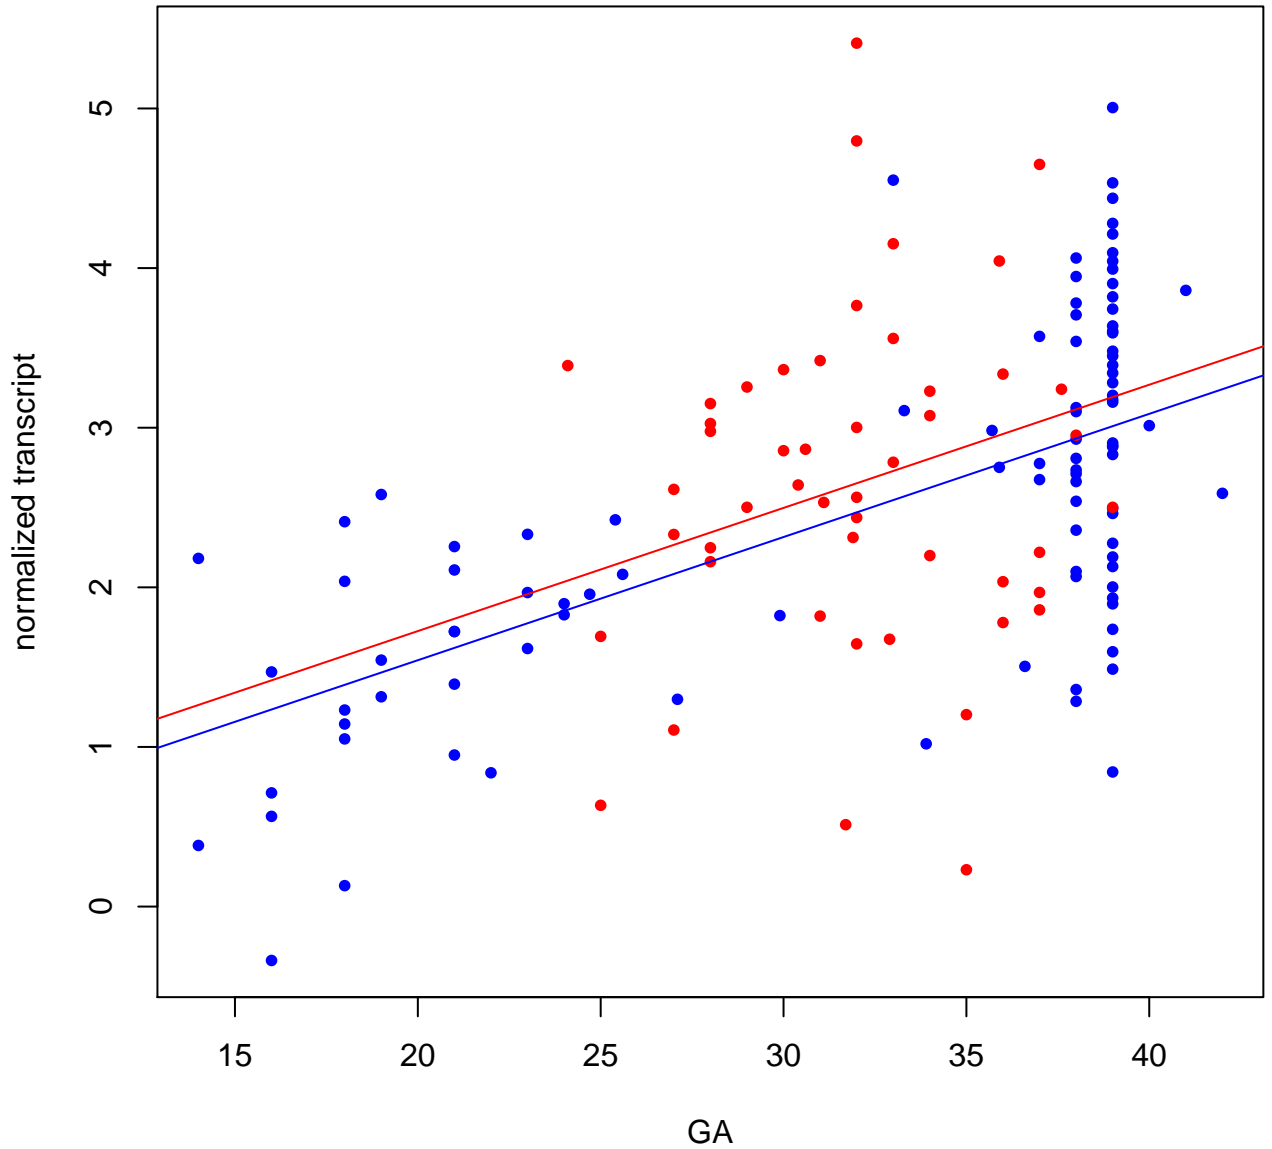

# 209238\_at

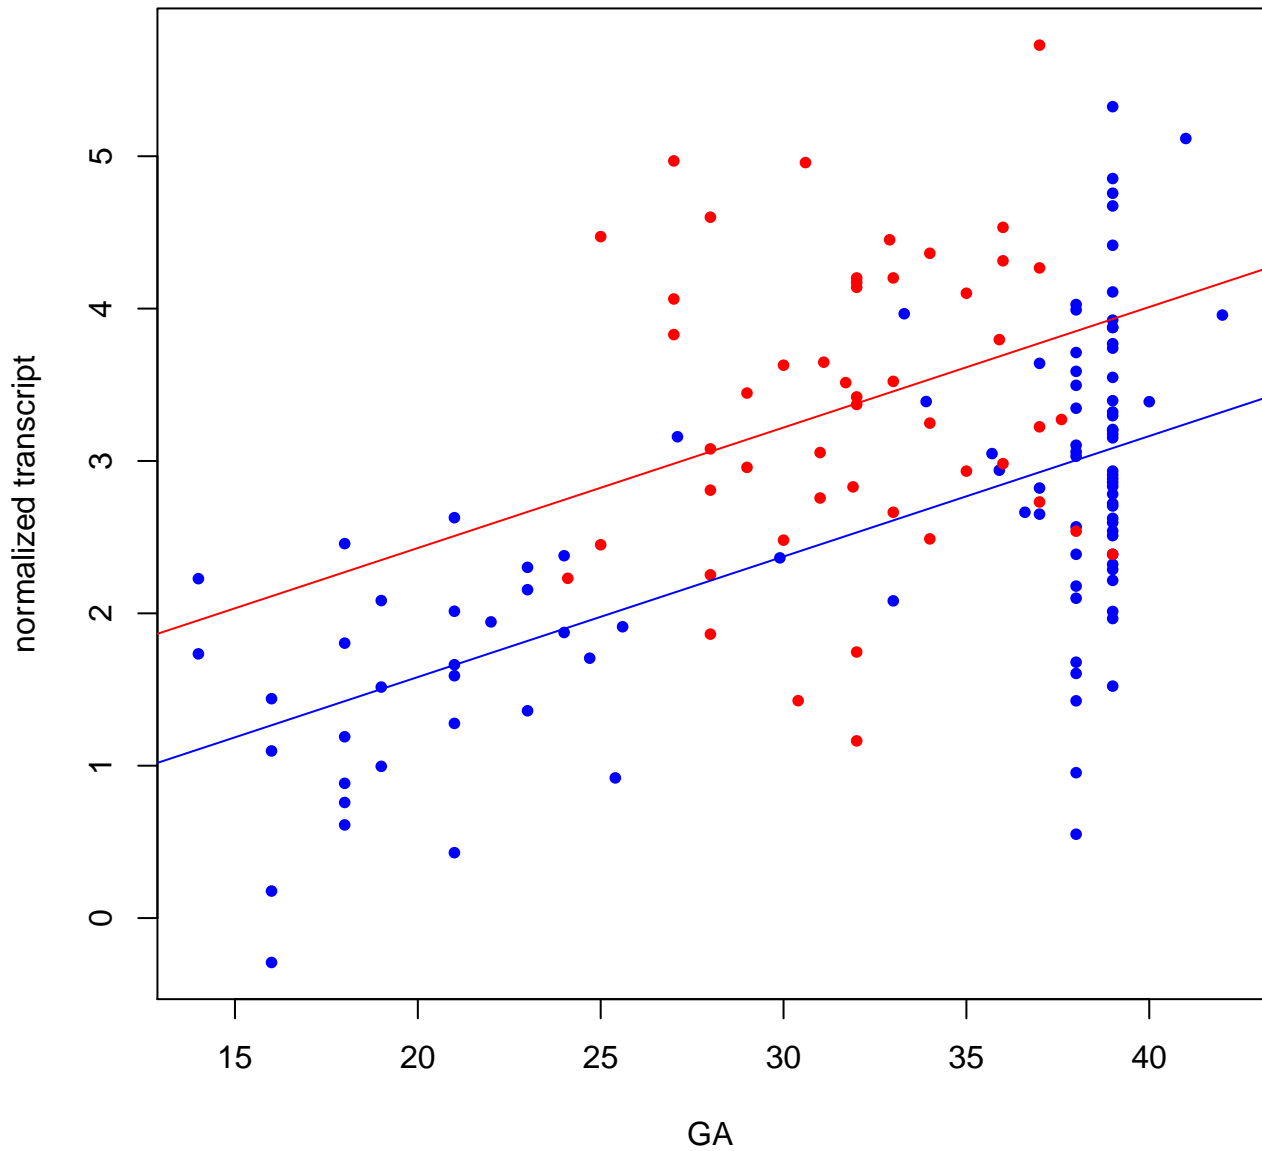

# 201576\_s\_at

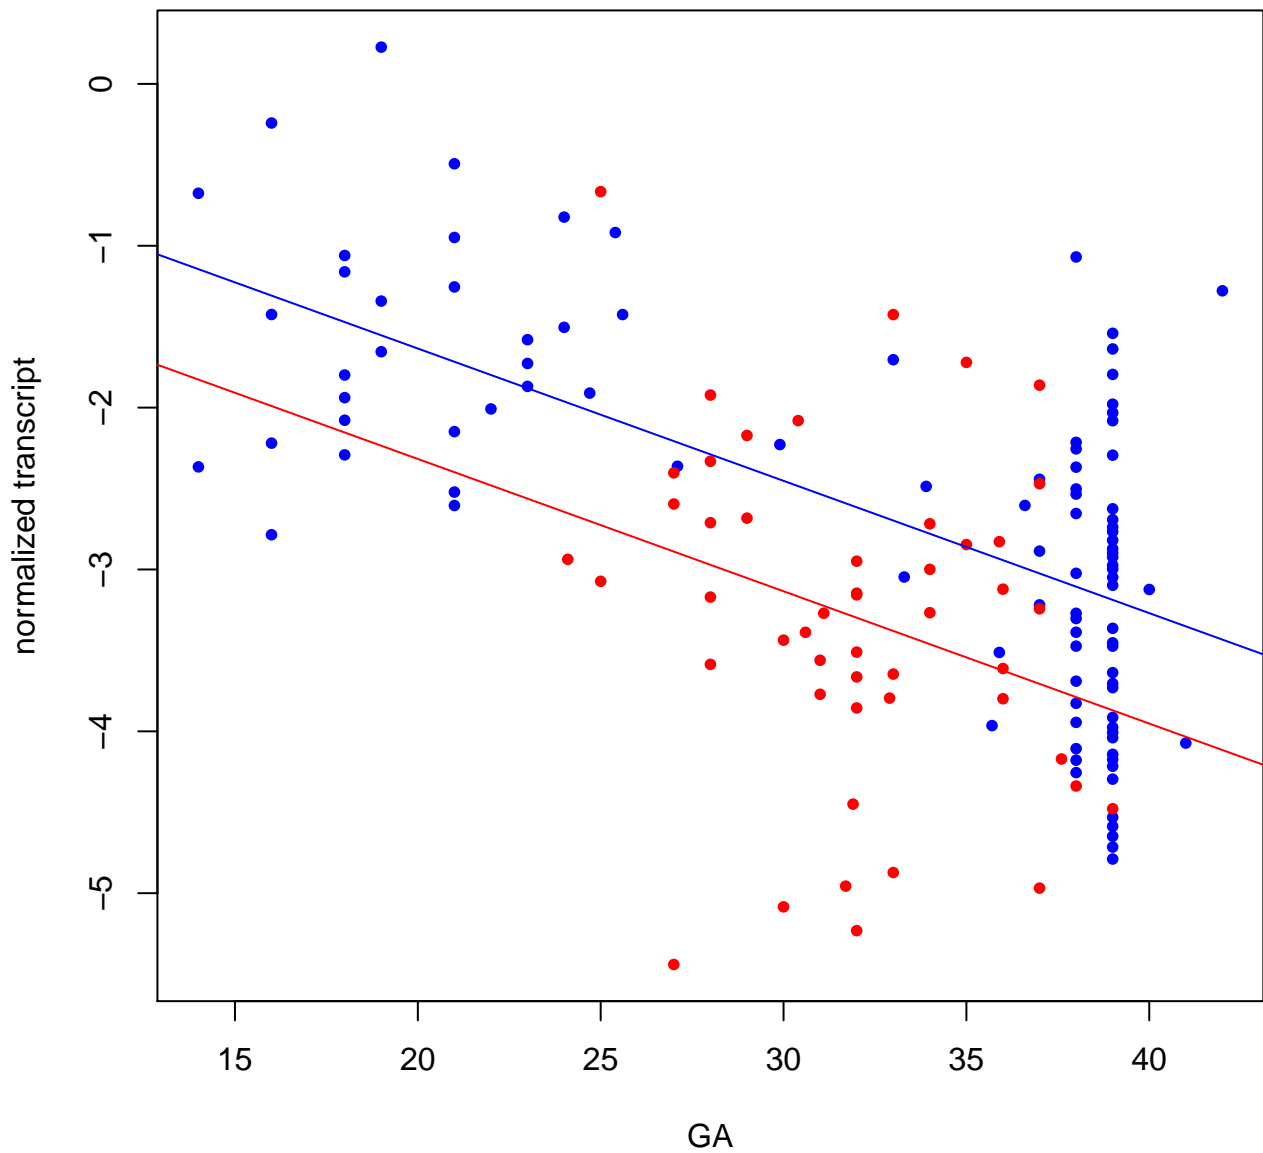

# 204457\_s\_at

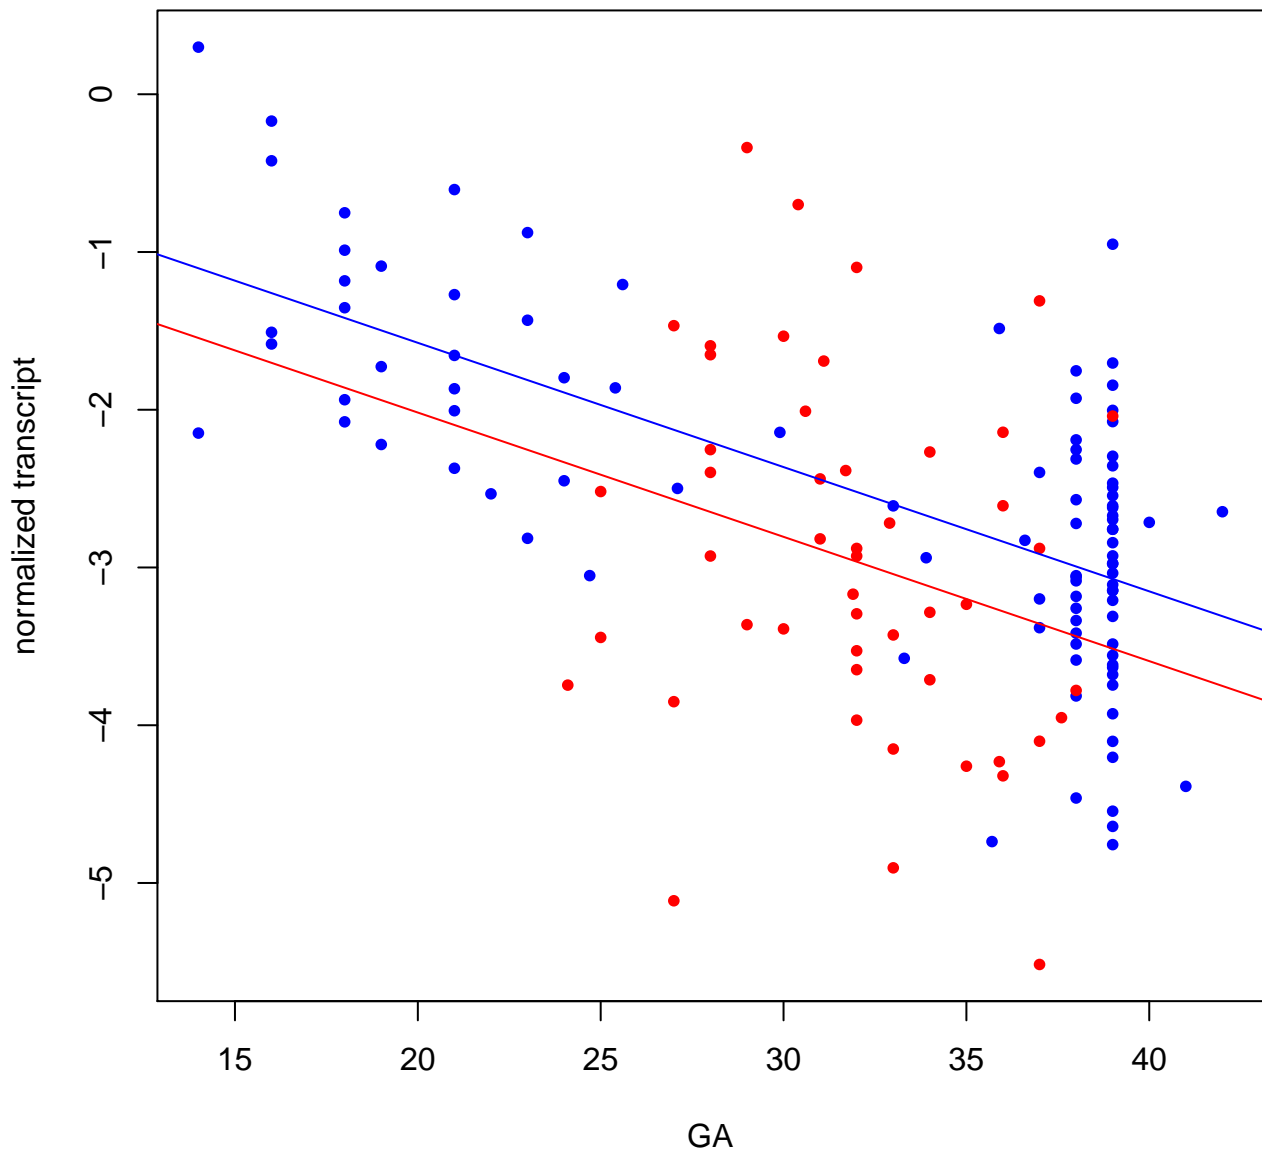

# 202796\_at

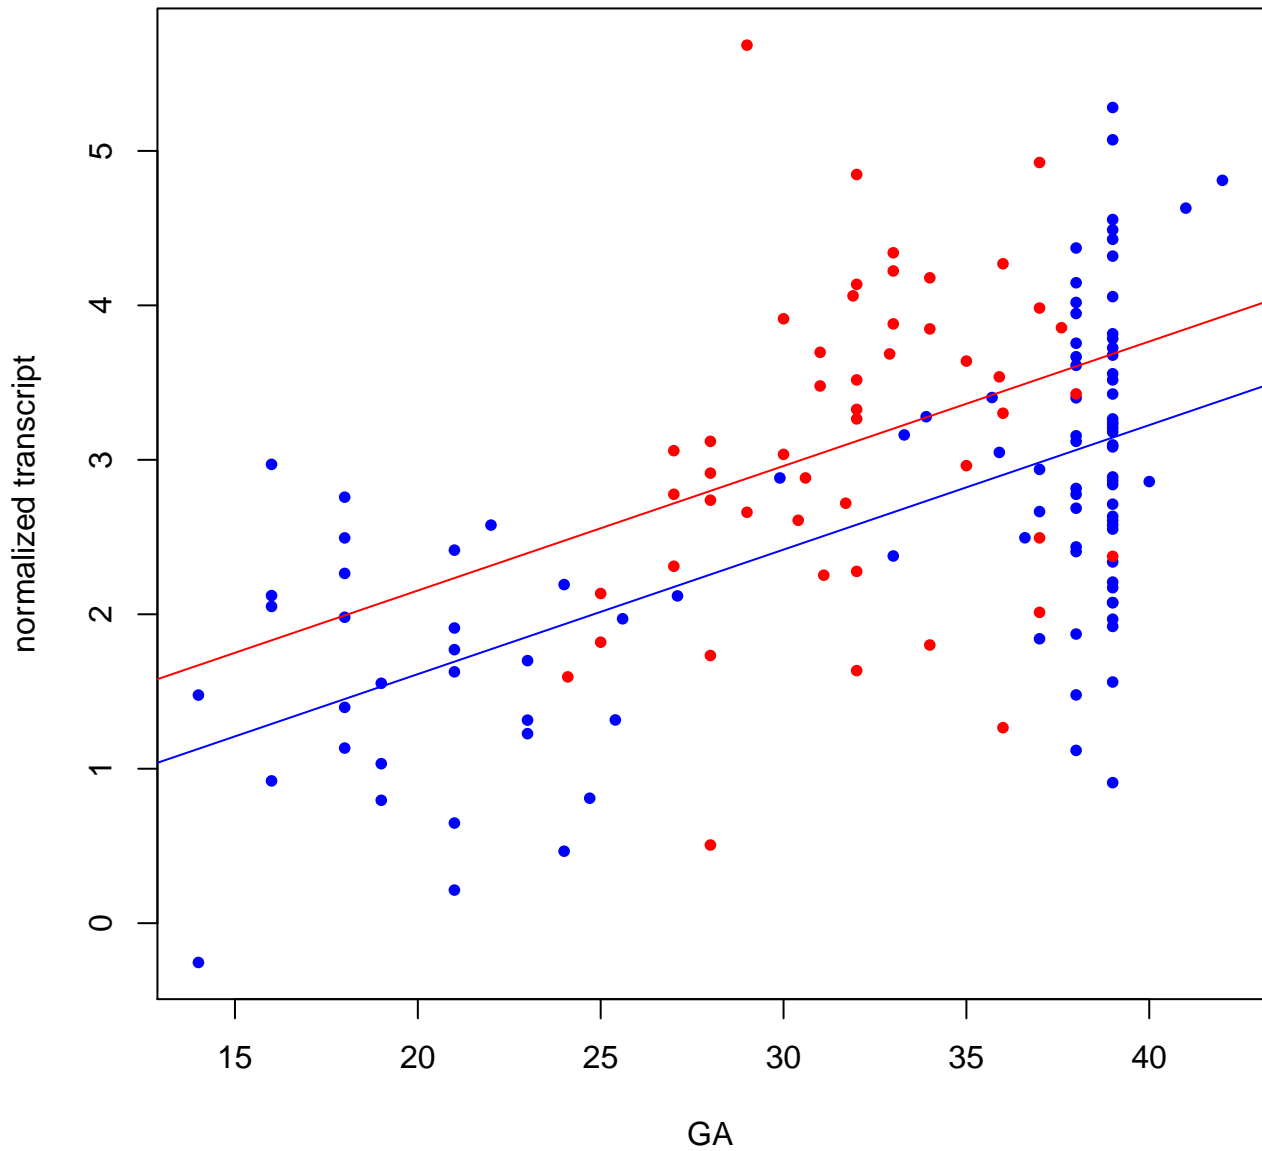



# 204620\_s\_at

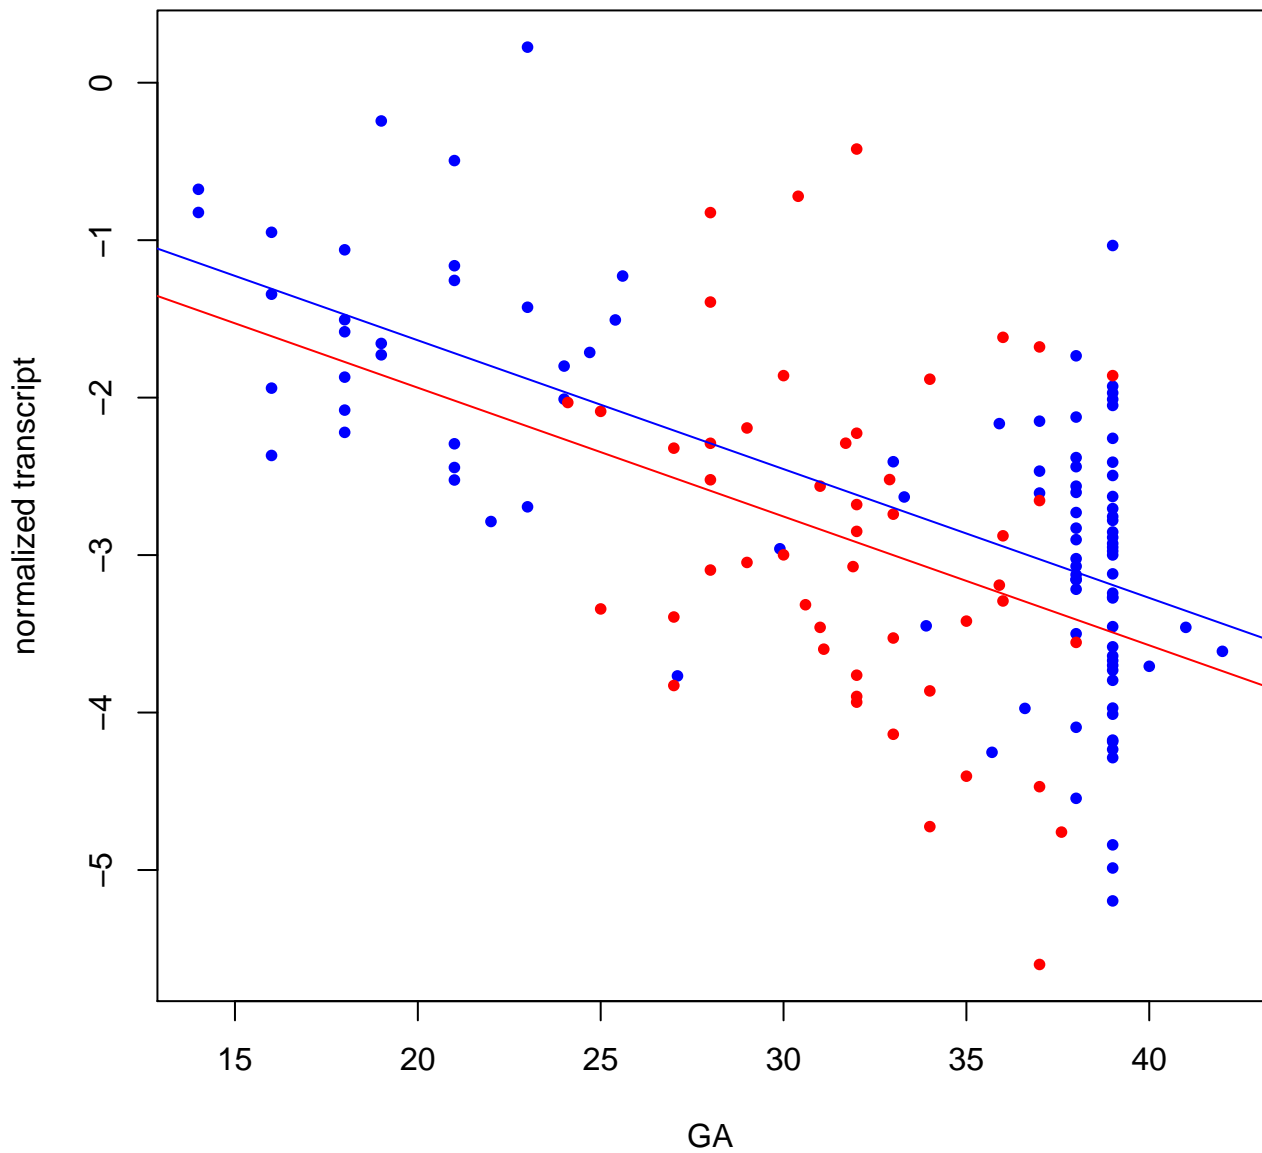



# 215646\_s\_at

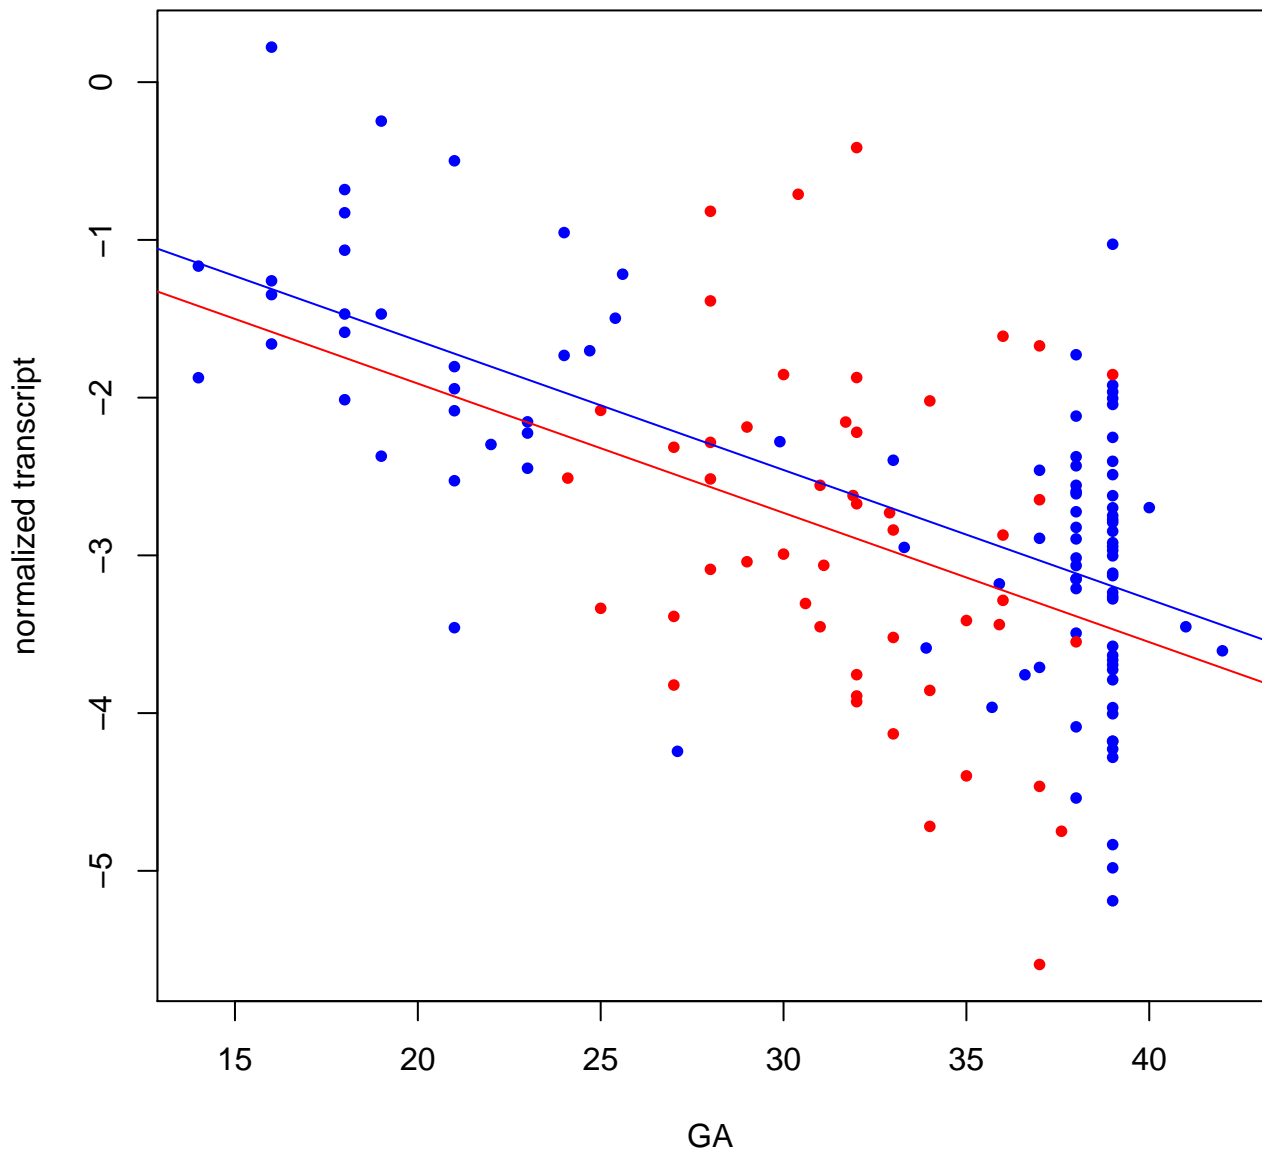

# 211571\_s\_at

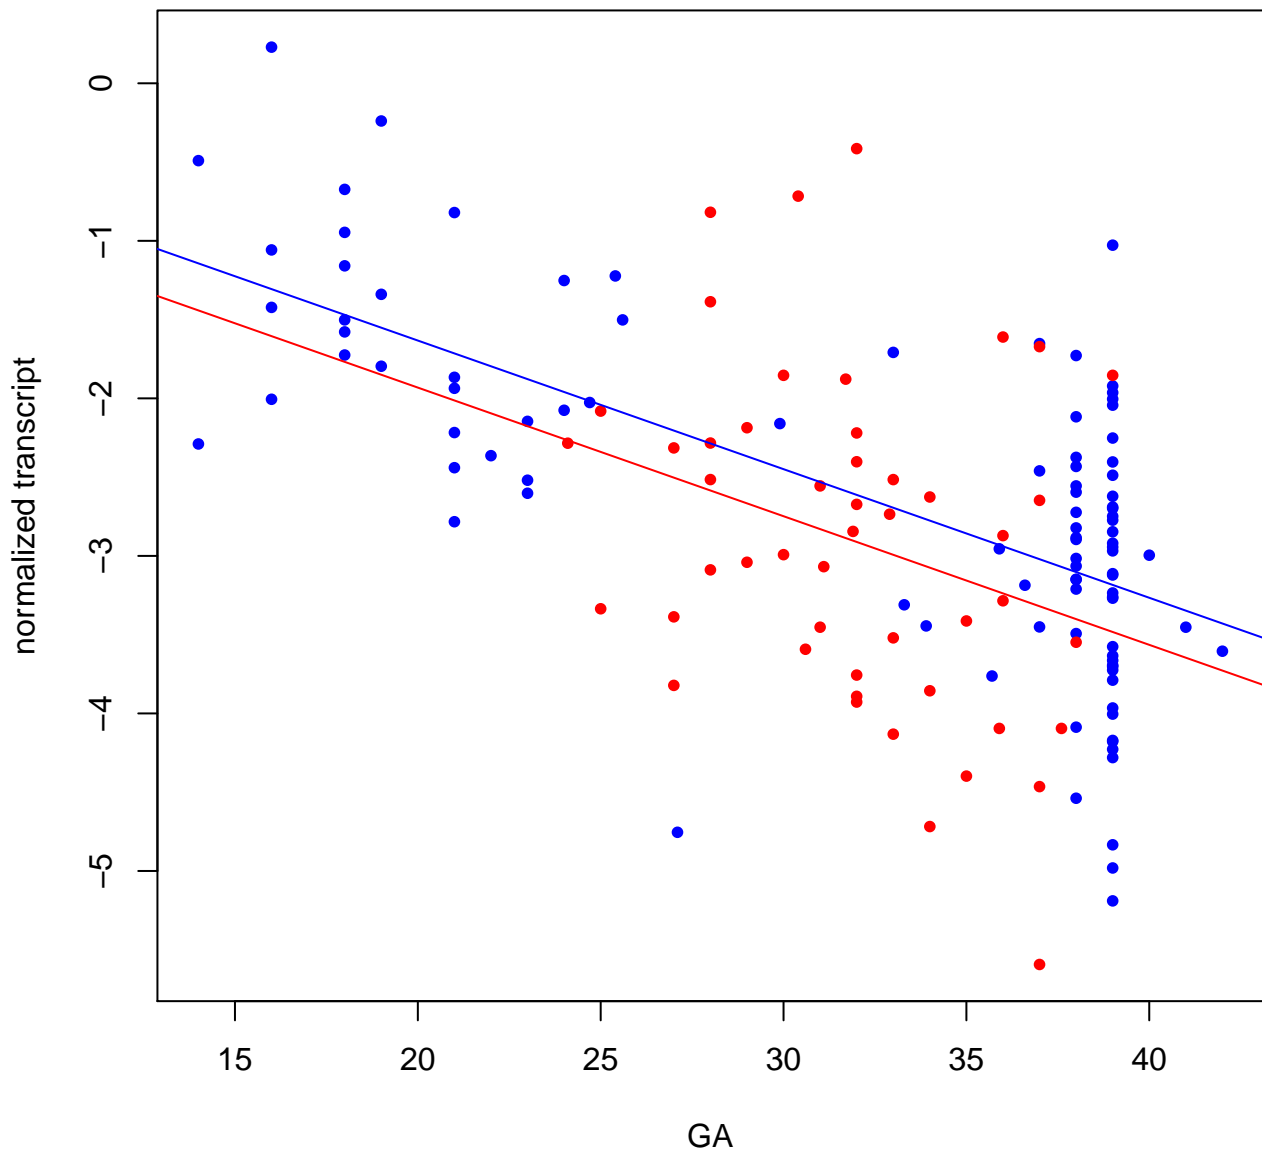

# 204619\_s\_at

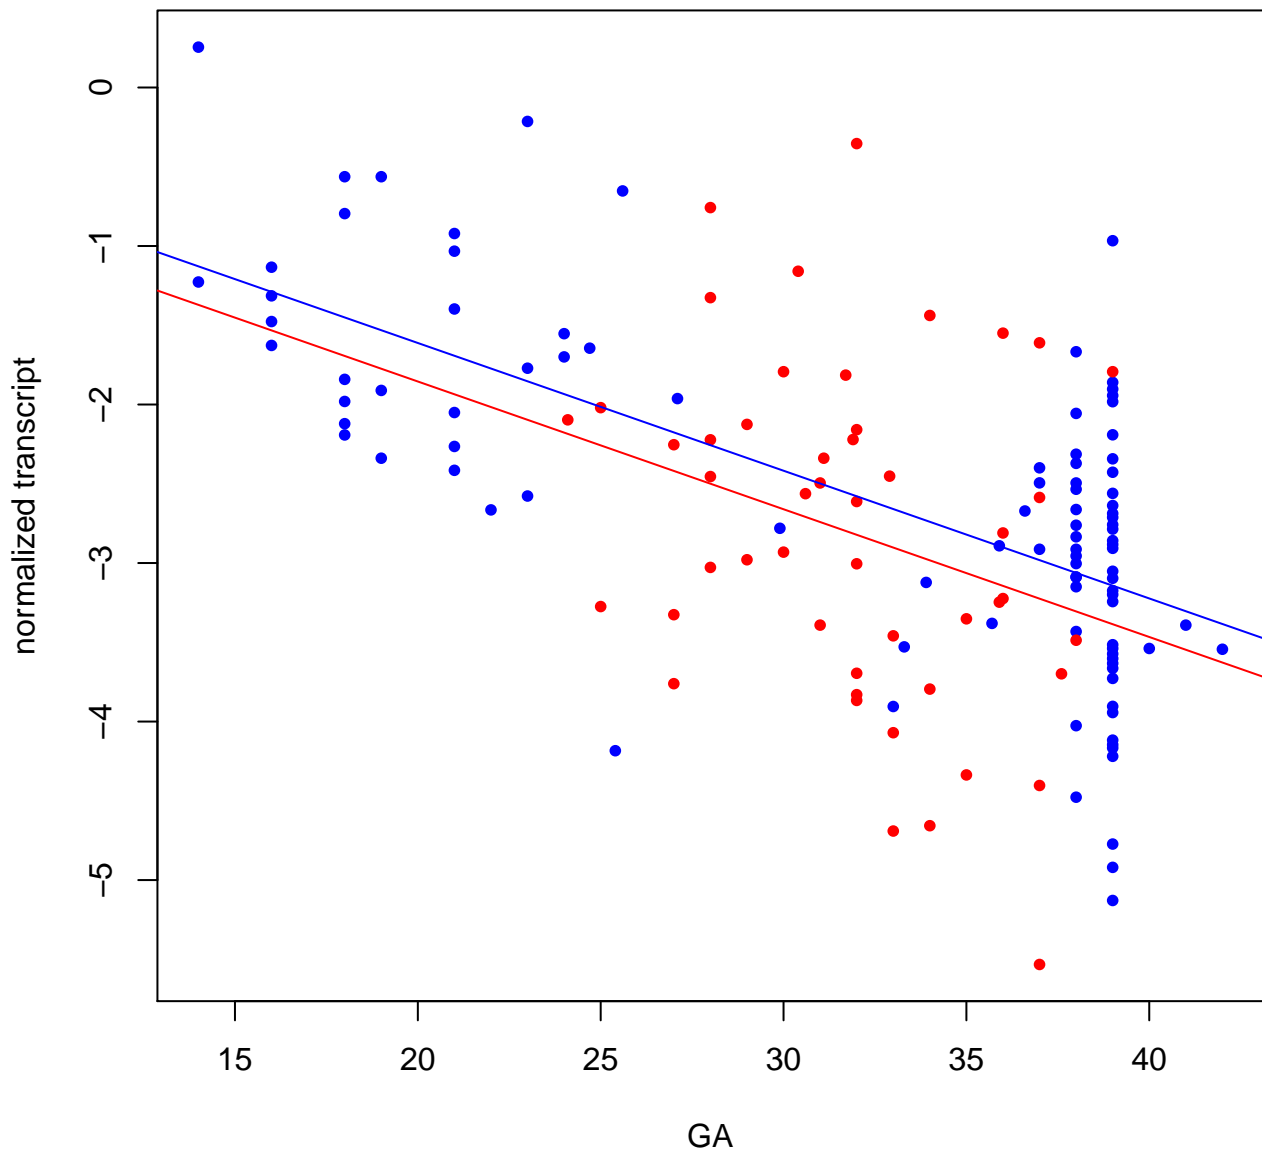

# 206176\_at

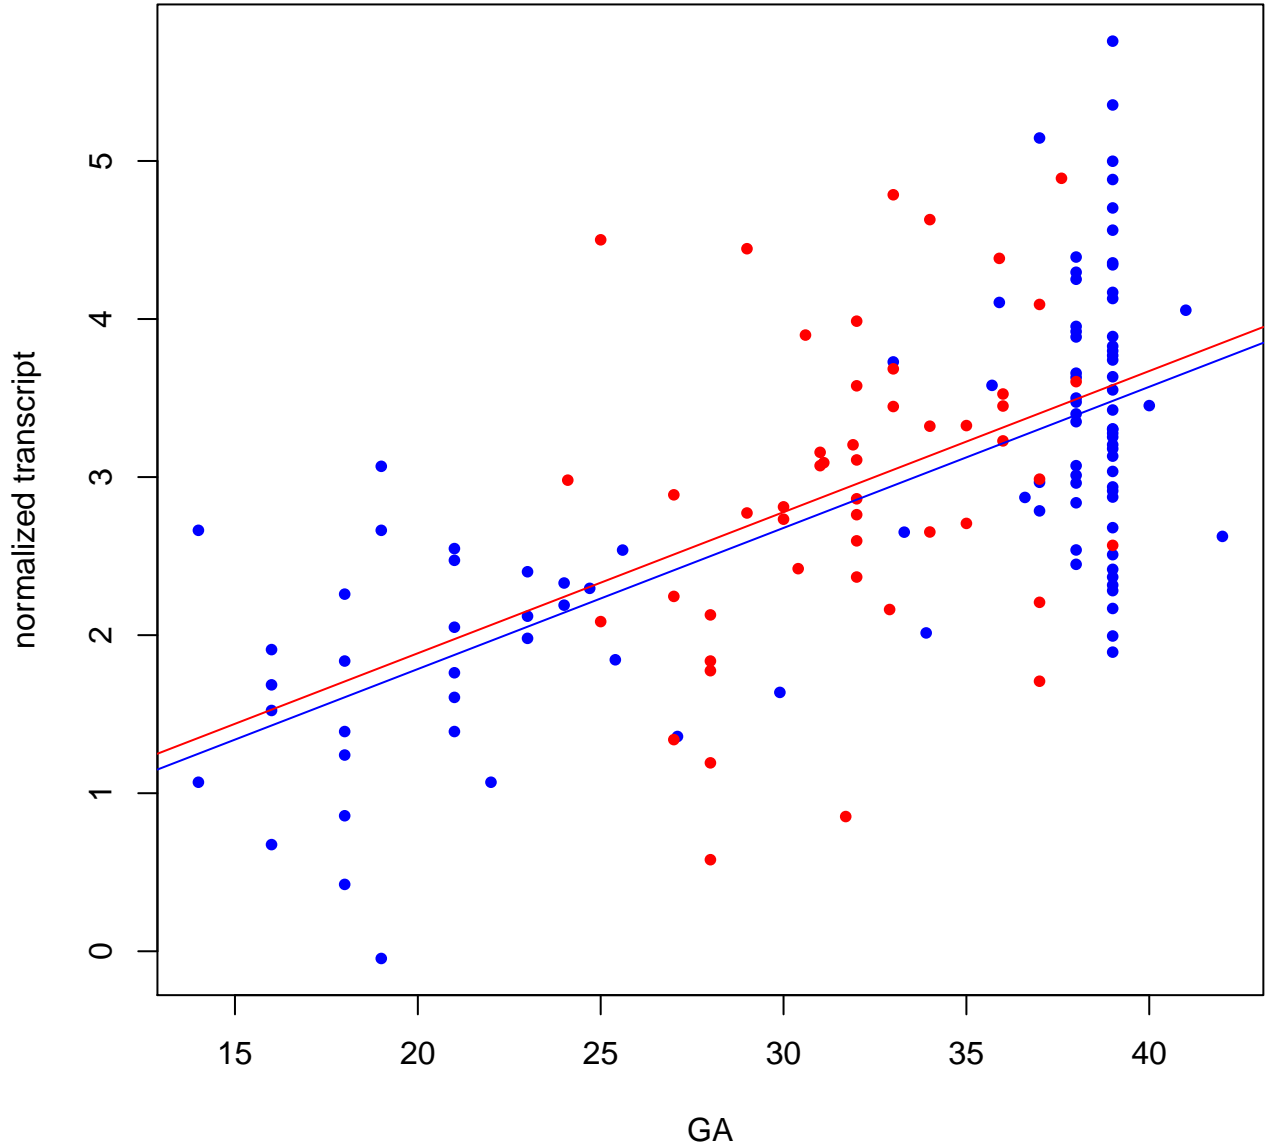

# 213793\_s\_at

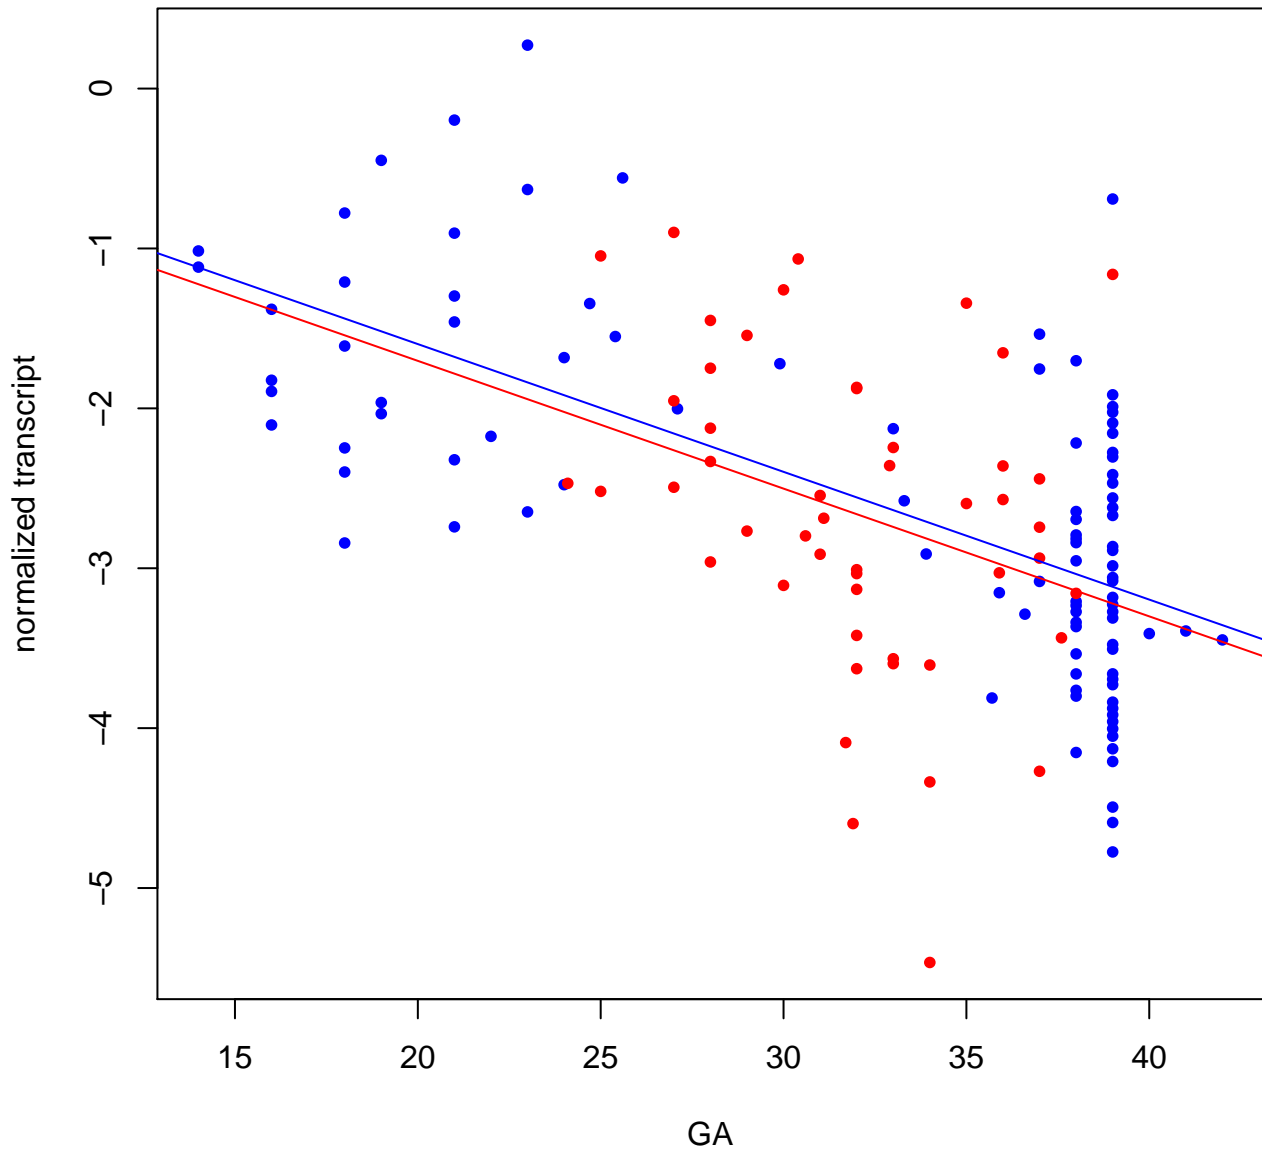

# 212192\_at

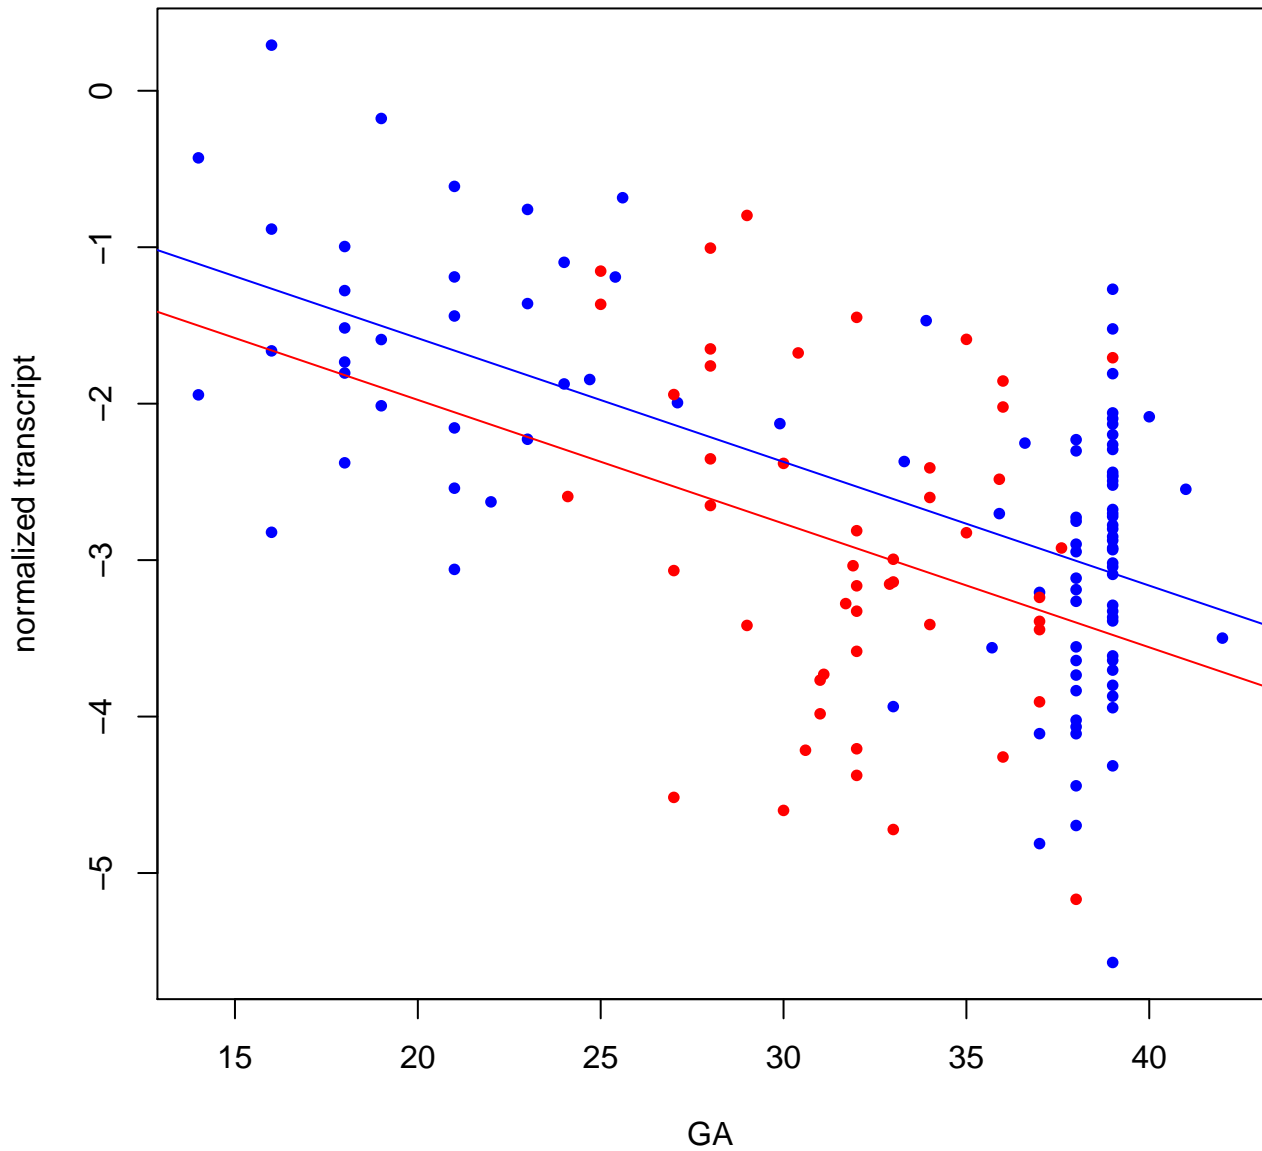

# 203407\_at

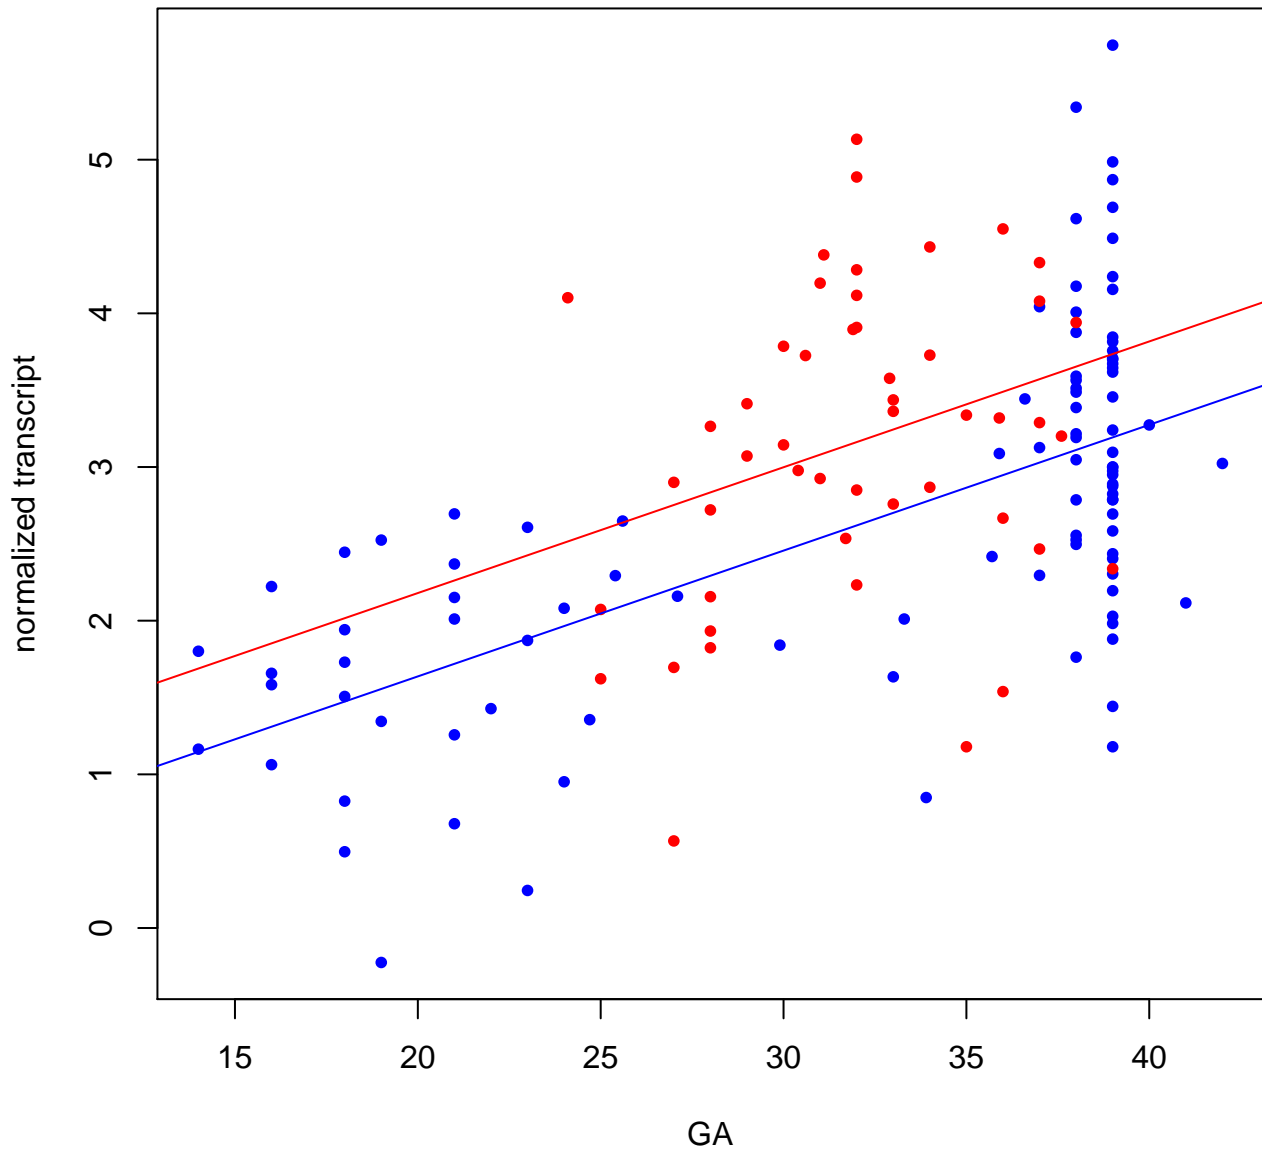

# 208949\_s\_at

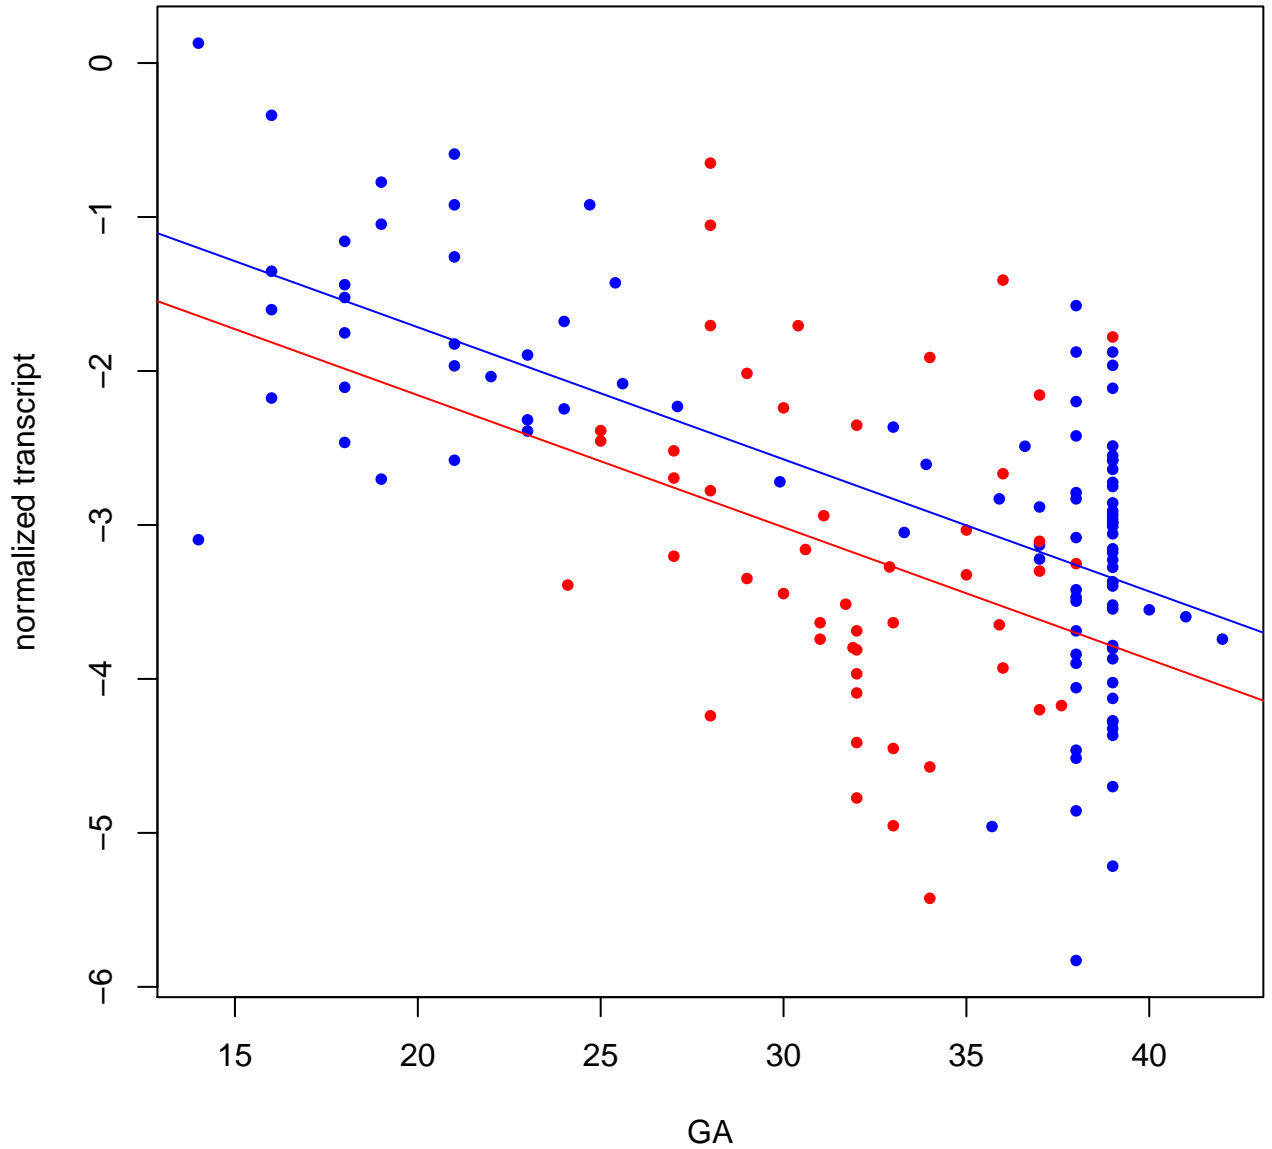



# 208949\_s\_at.1

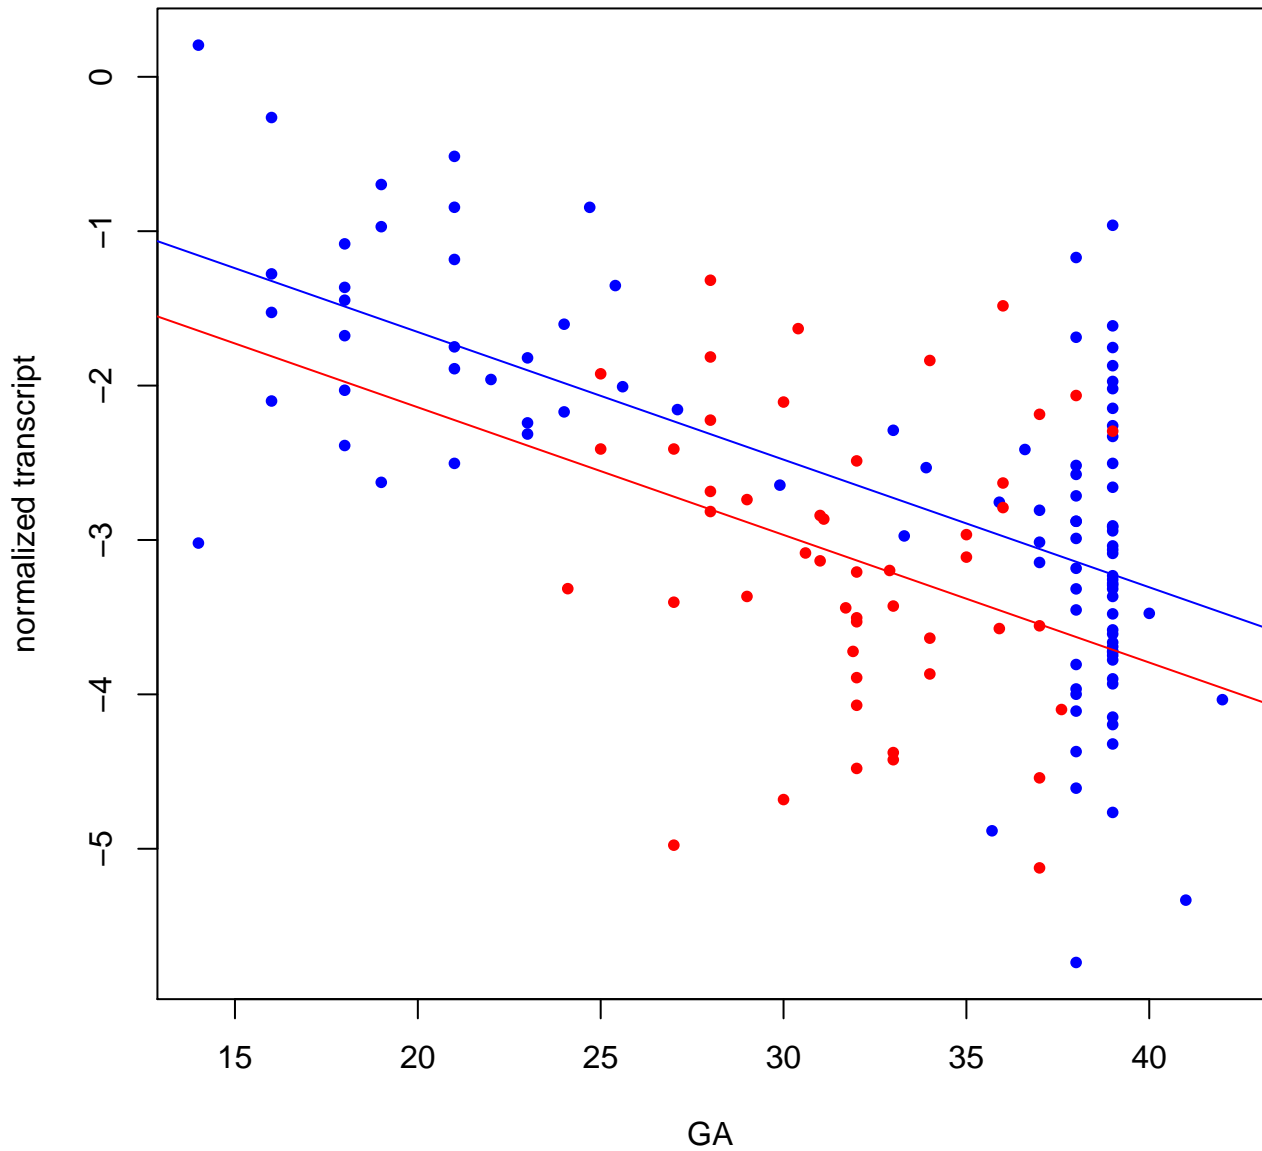

# 203131\_at

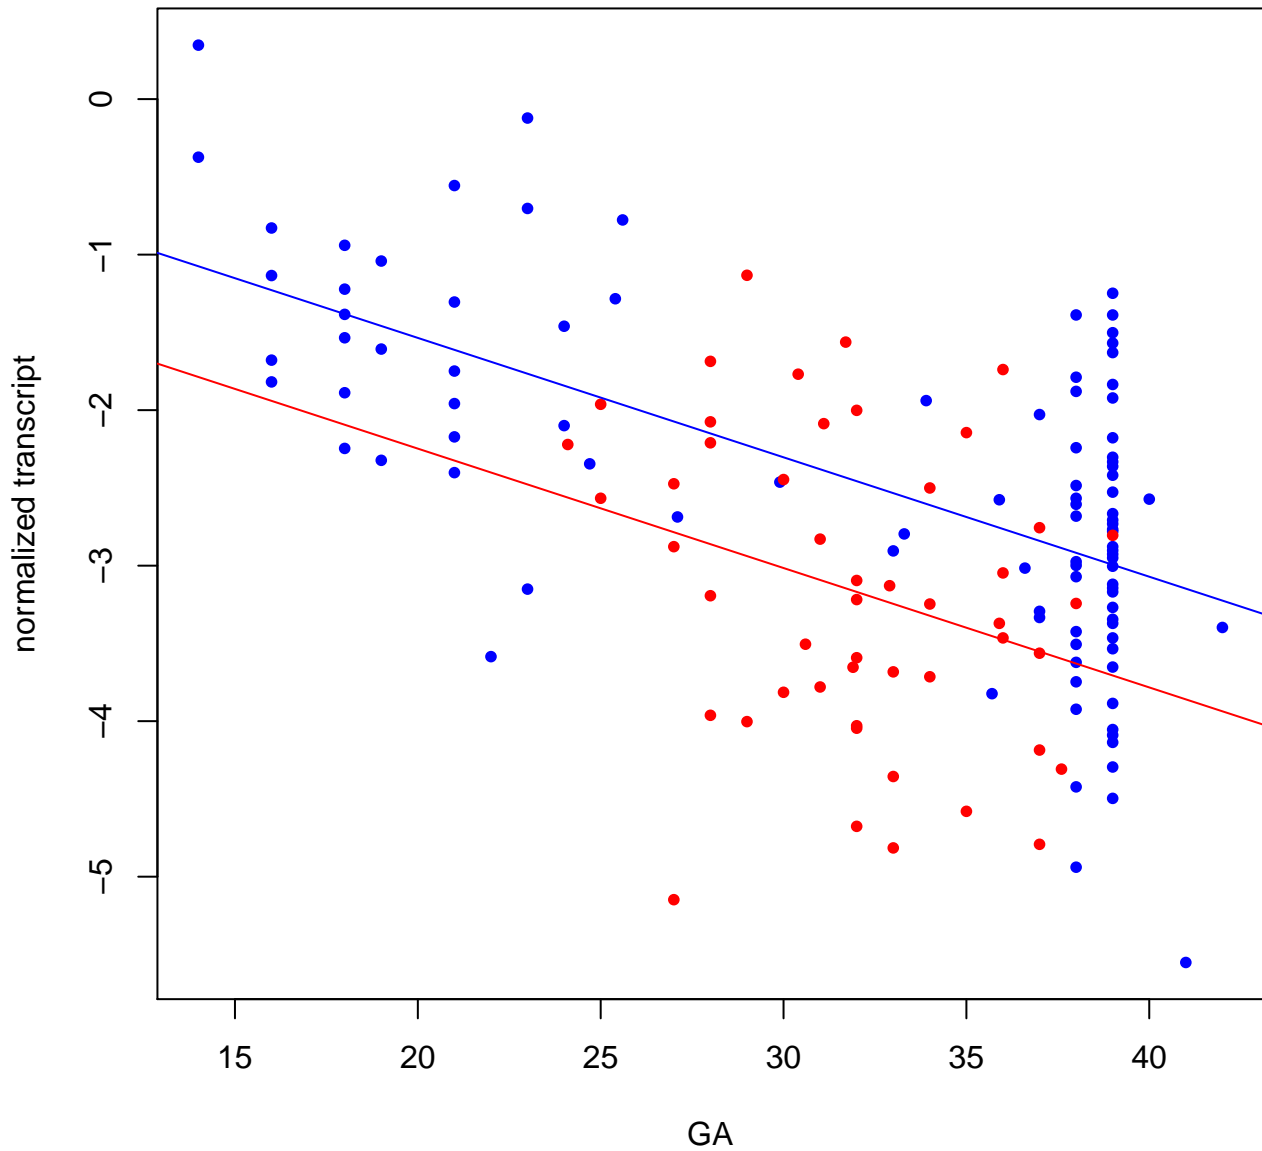



# 204114\_at

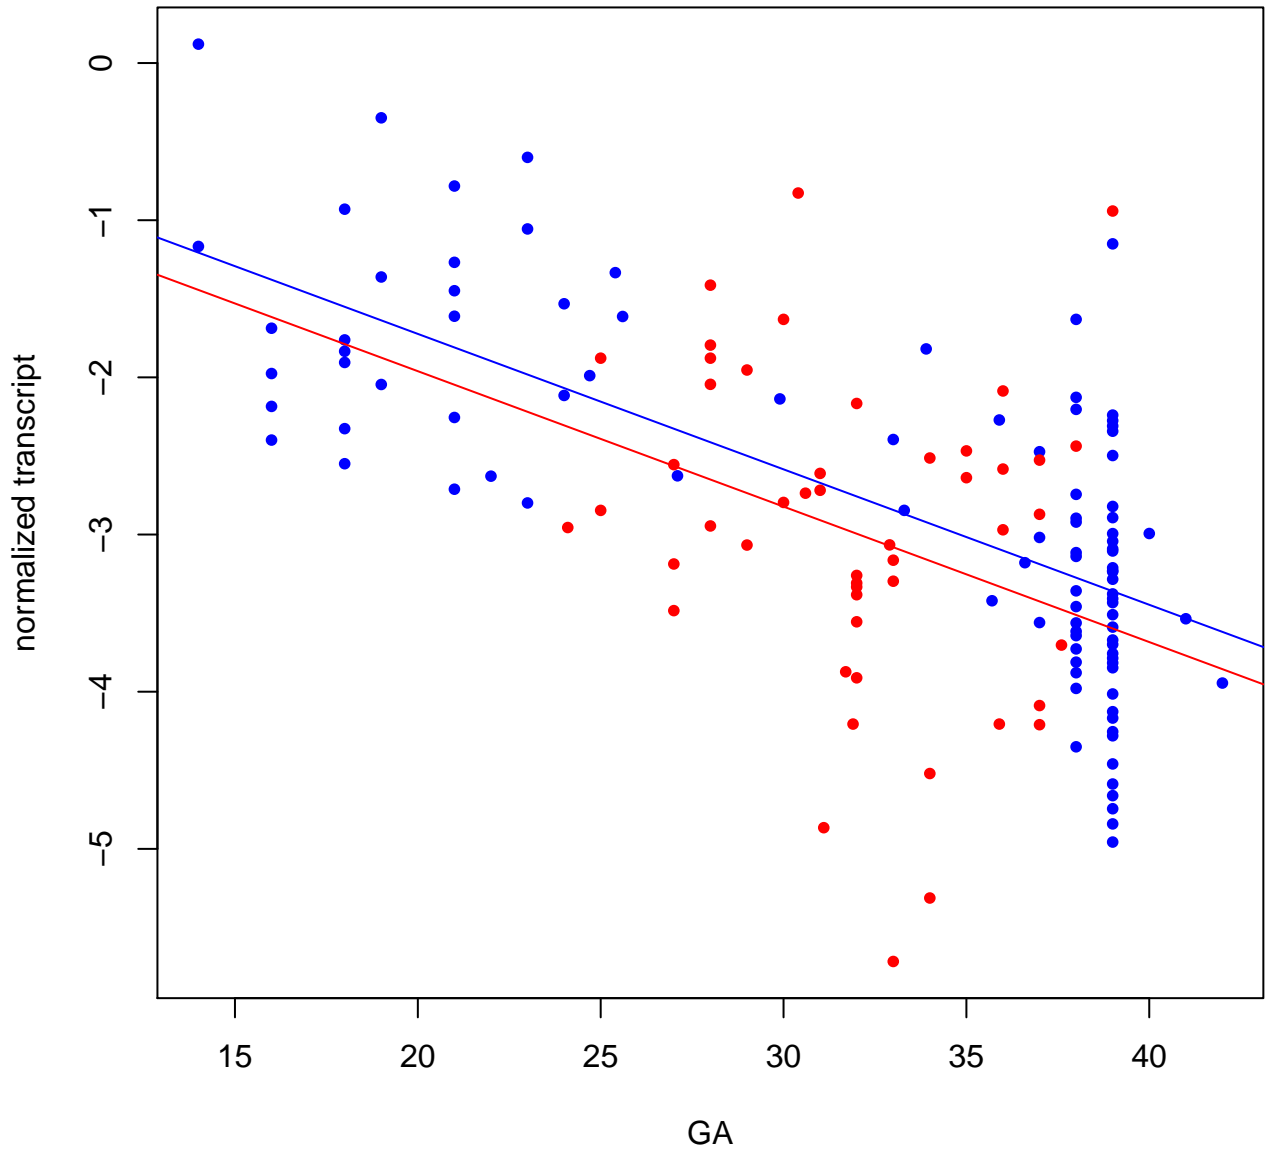

# 212195\_at

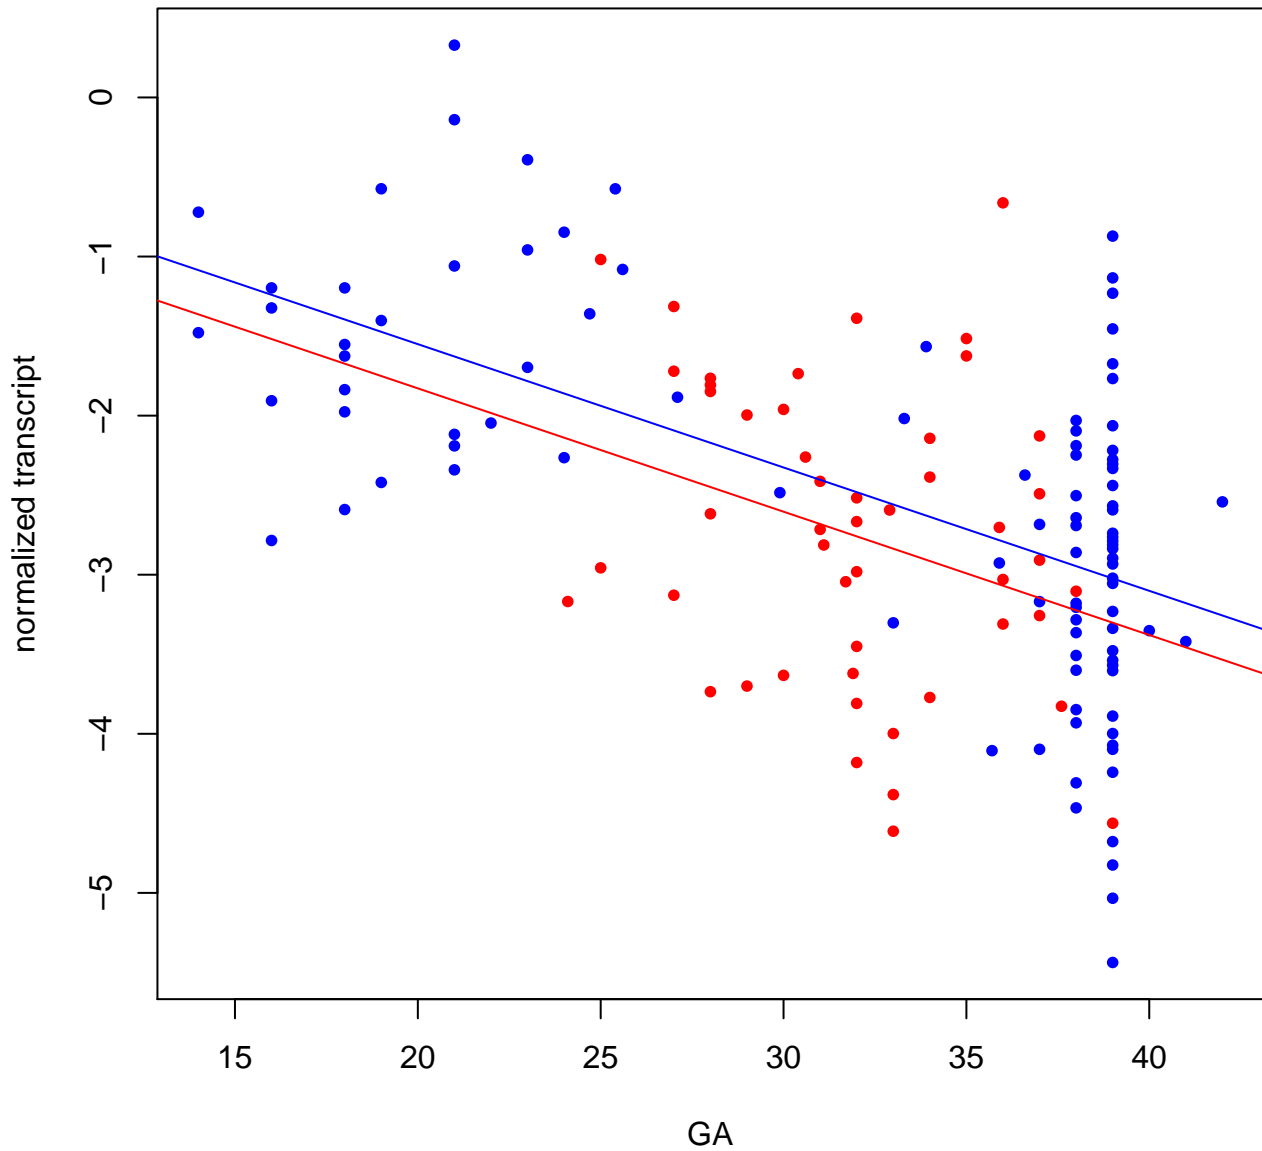

# 212195\_at.1

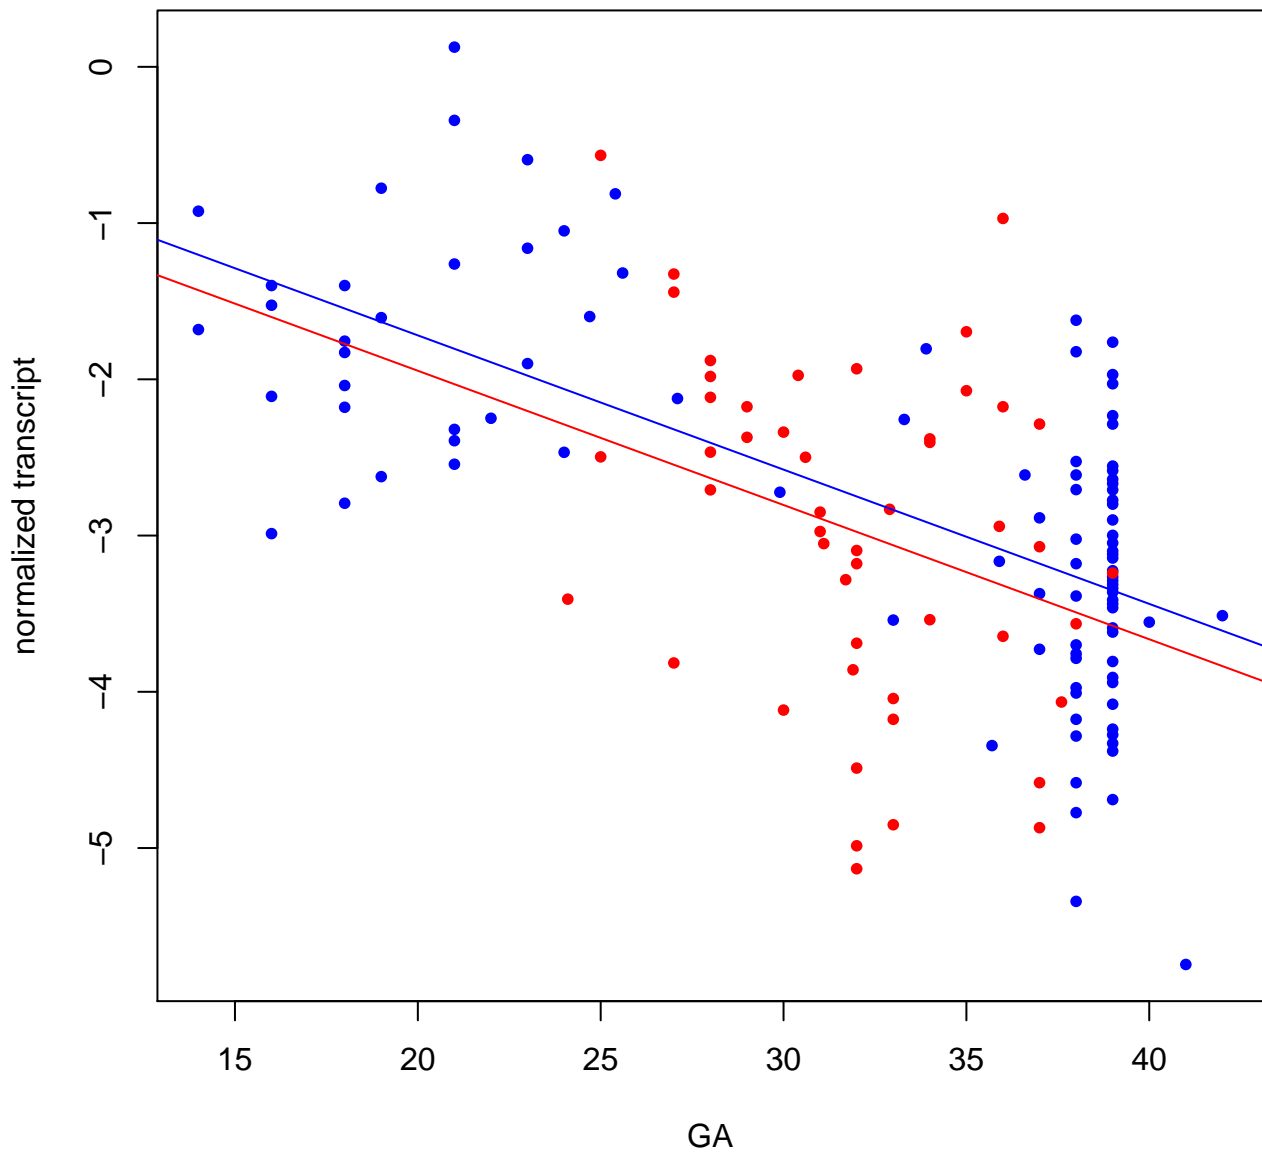

# 212195\_at.2

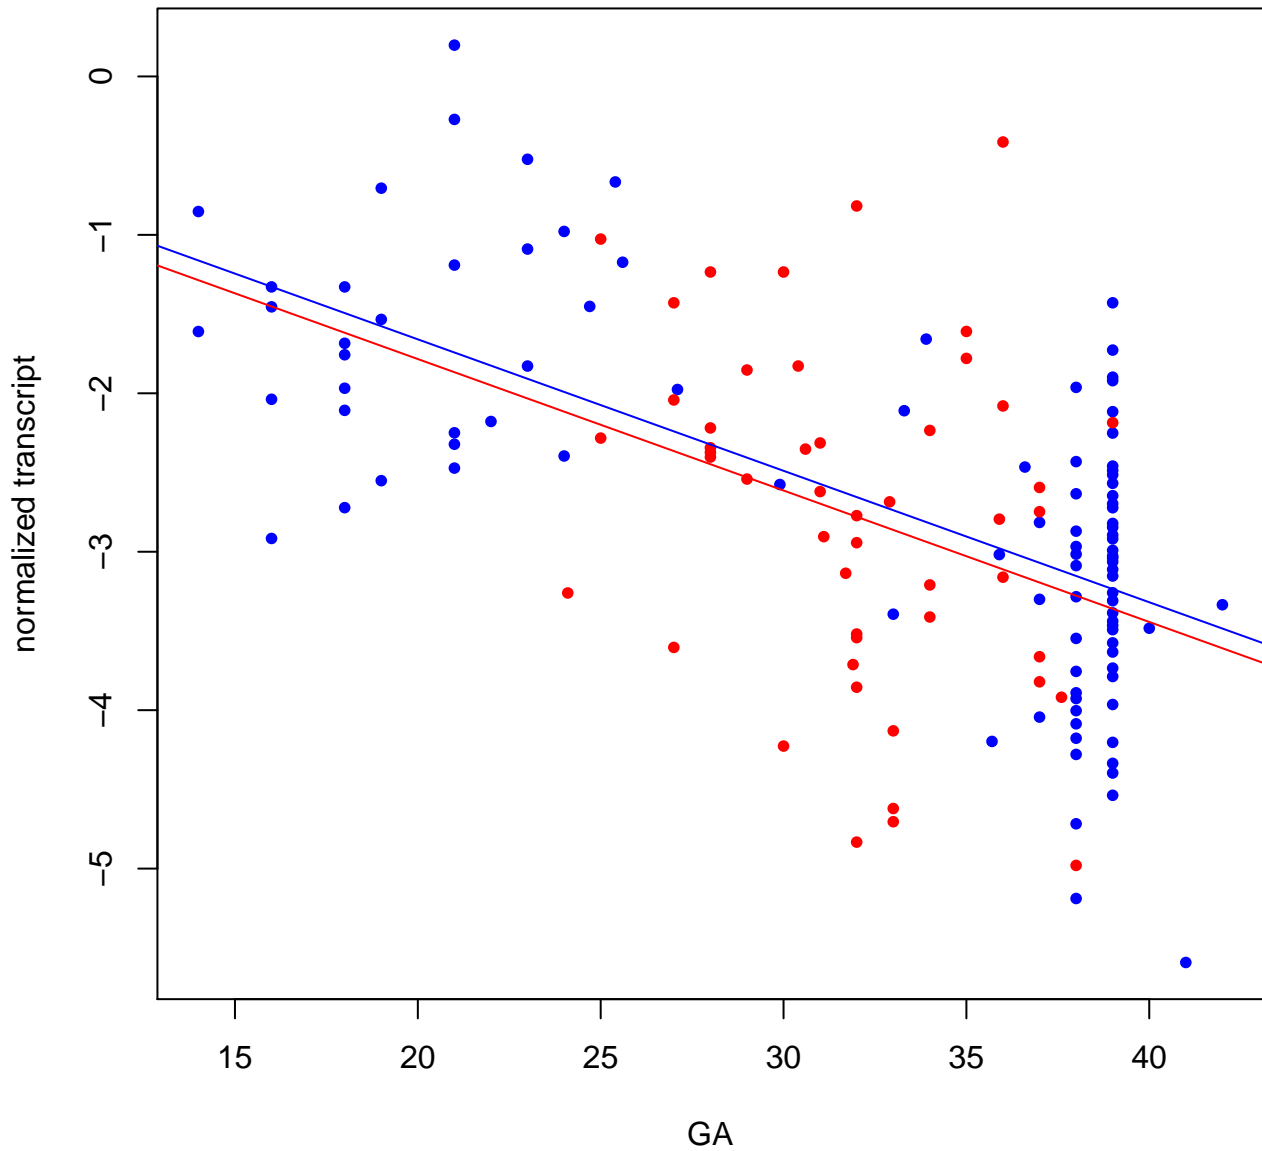

# 214660\_at

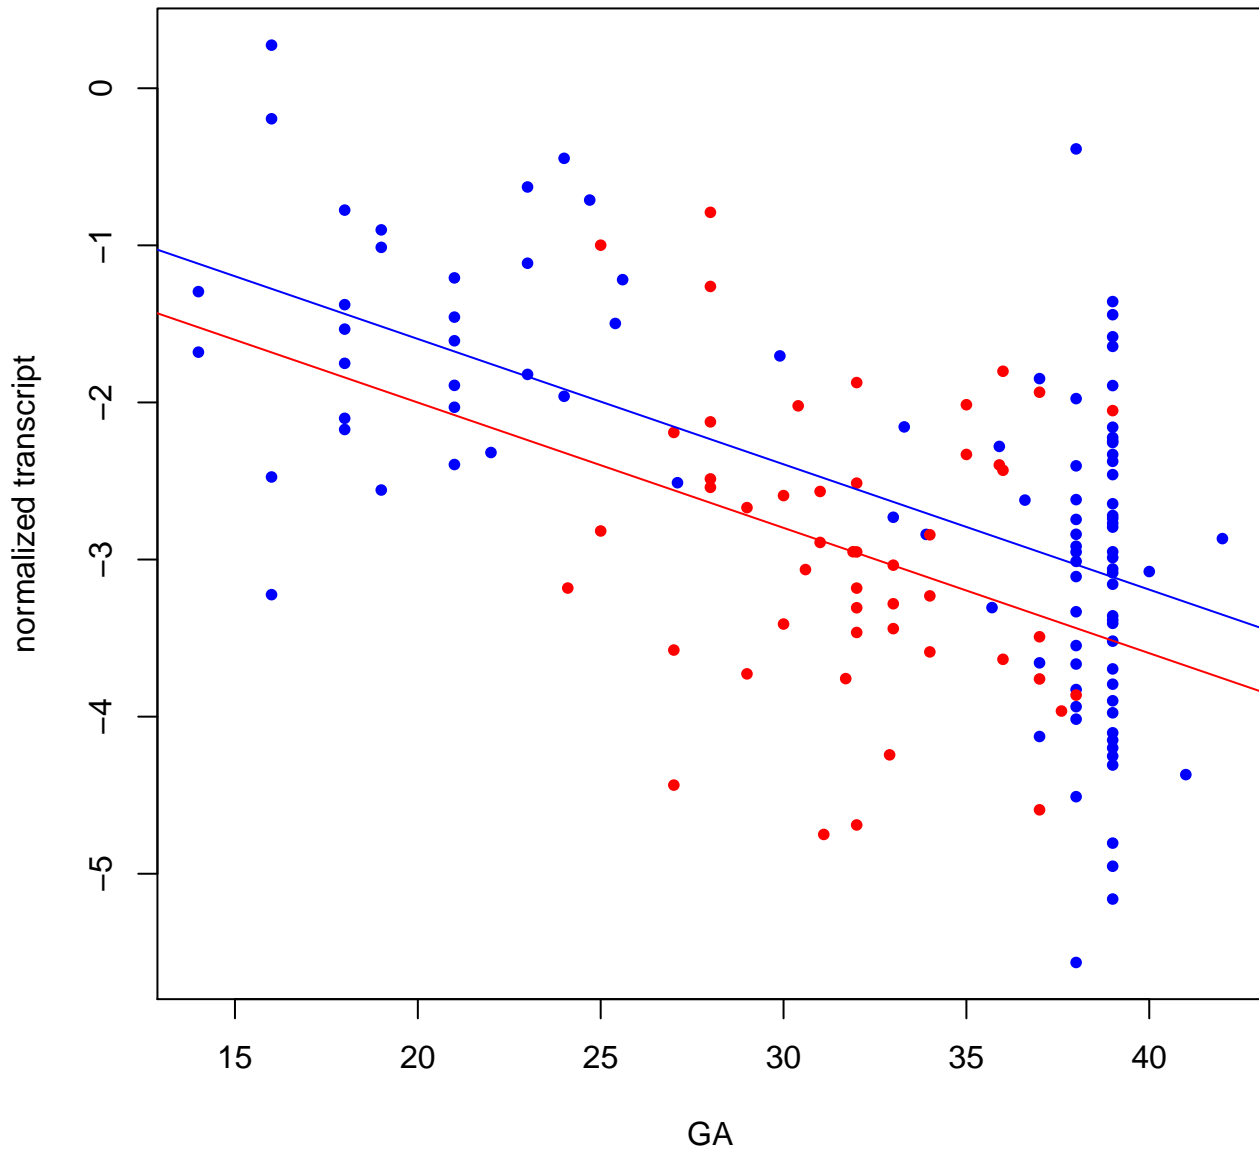



# 213541\_s\_at.1

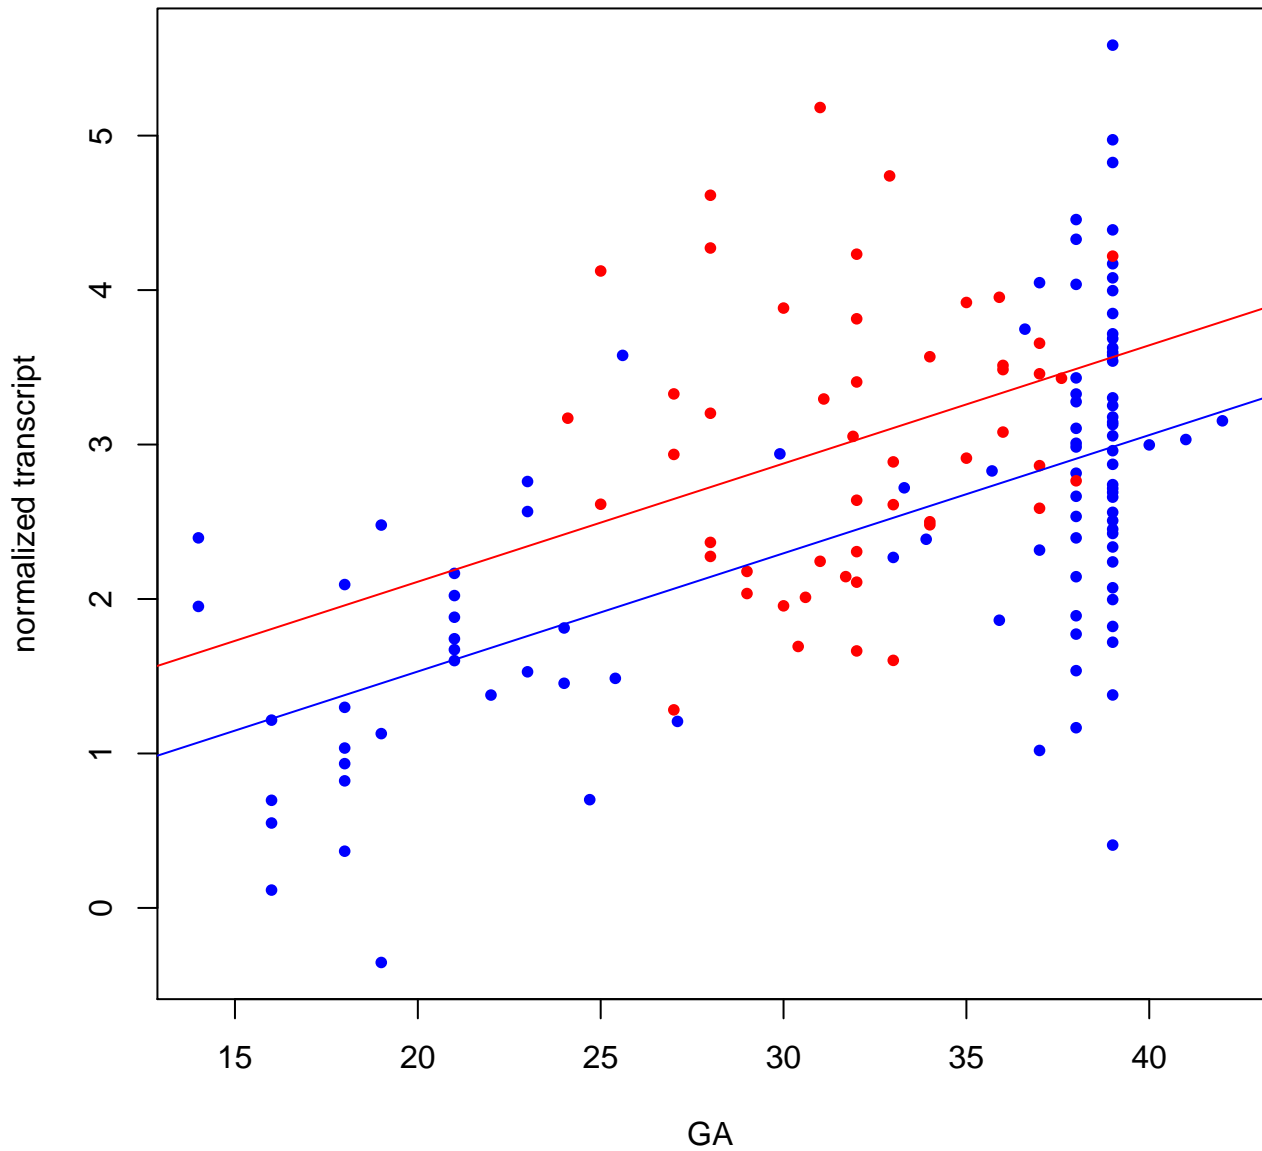

# 210645\_s\_at.1

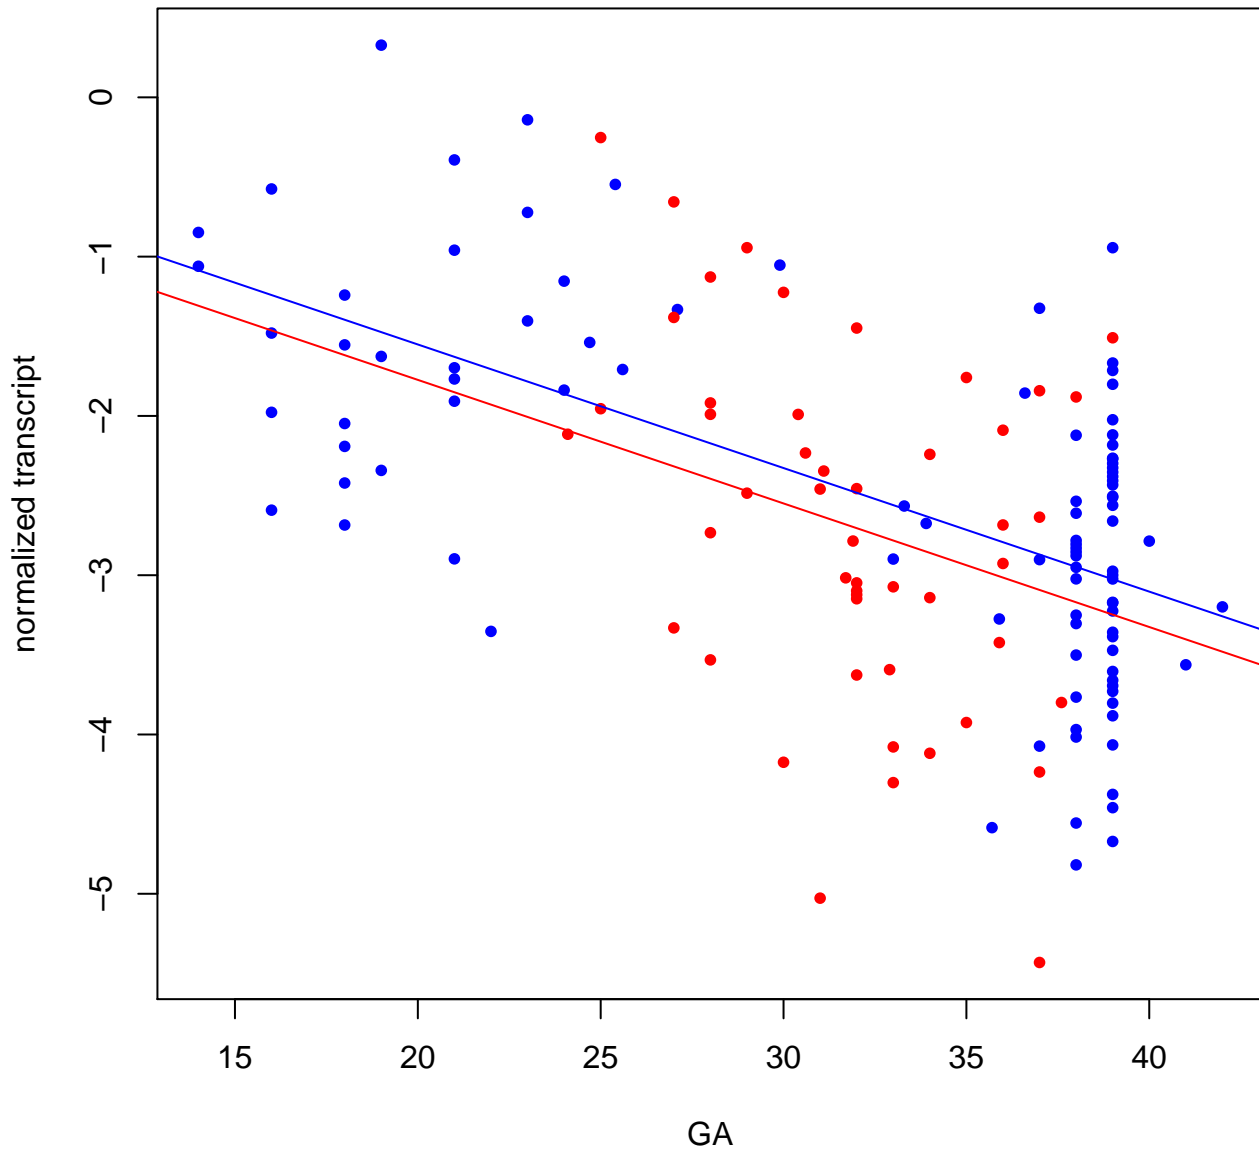

# 208678\_at

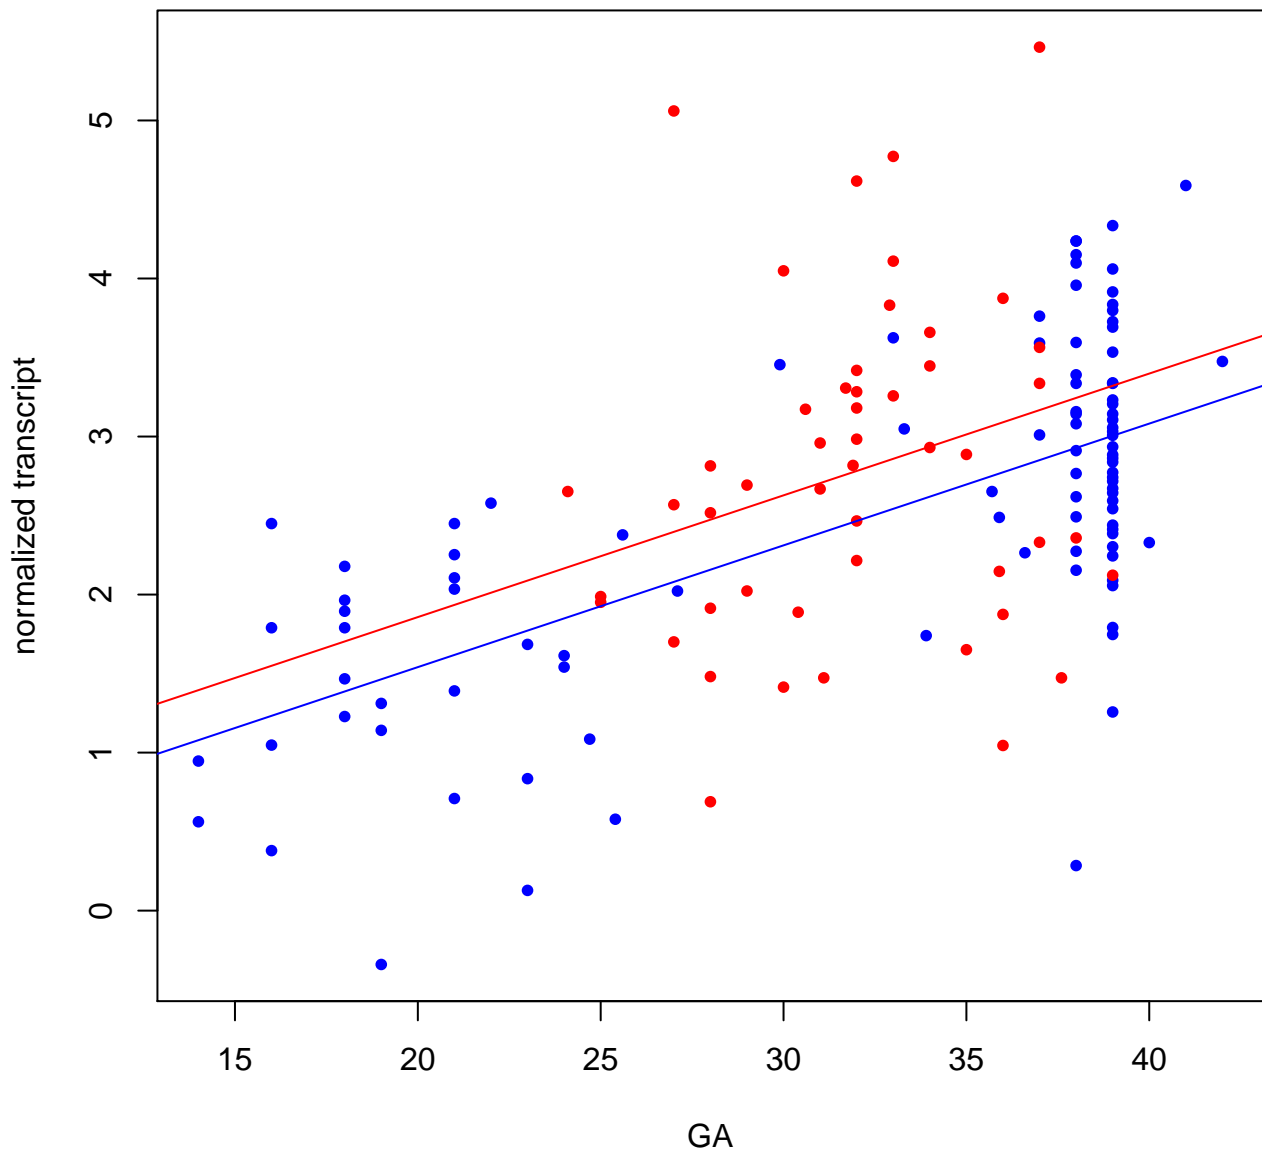



# 206453\_s\_at

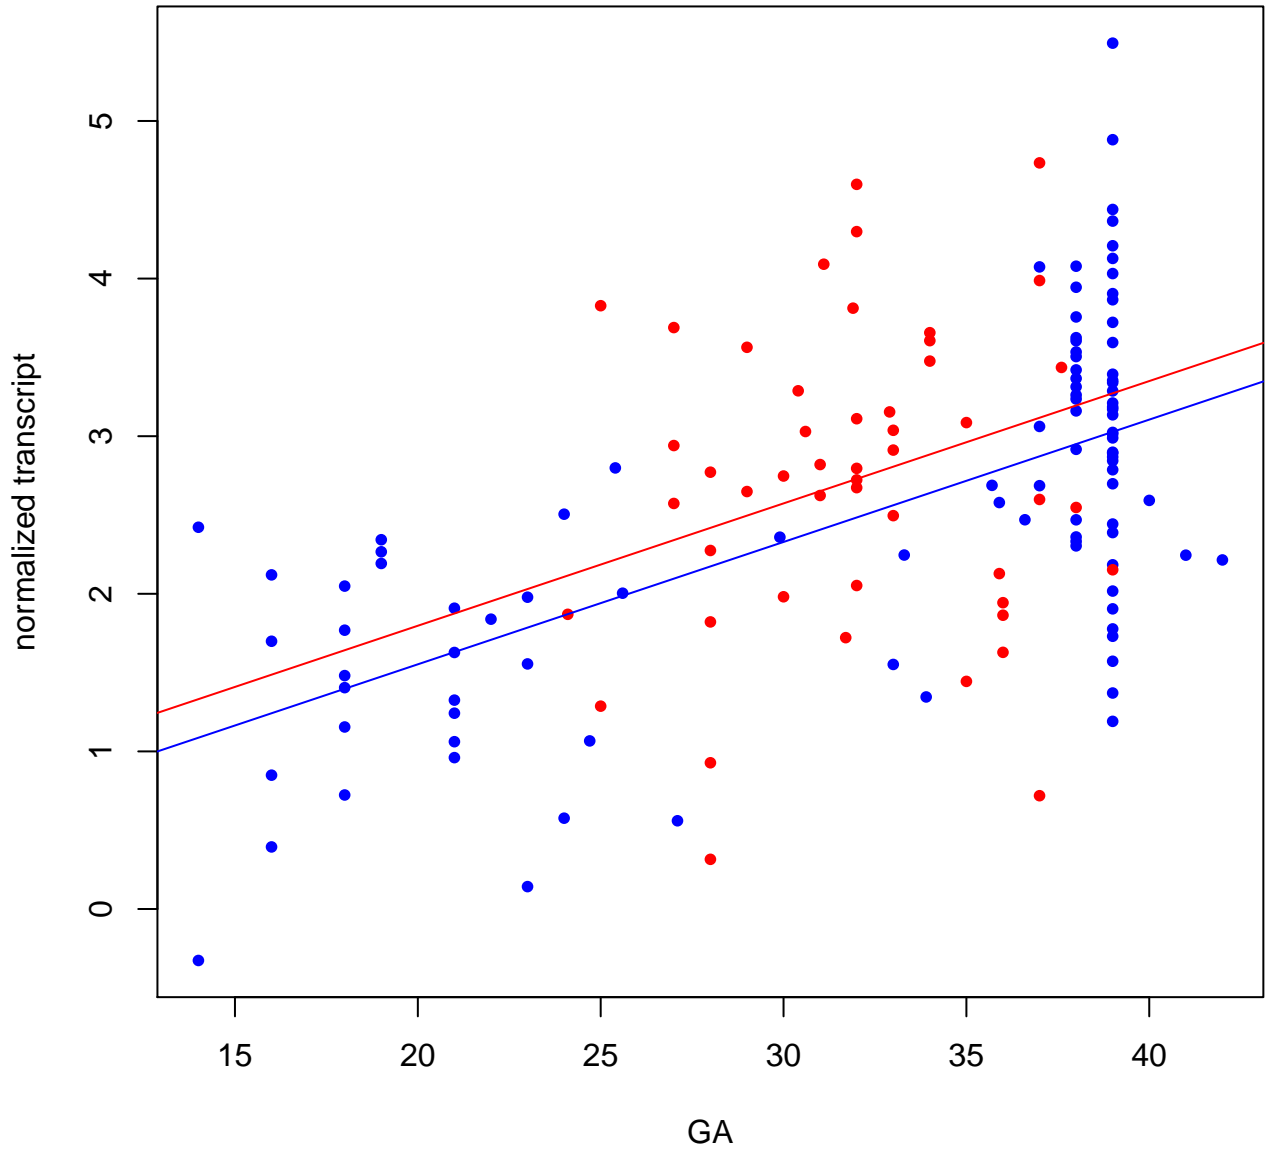

# 205572\_at

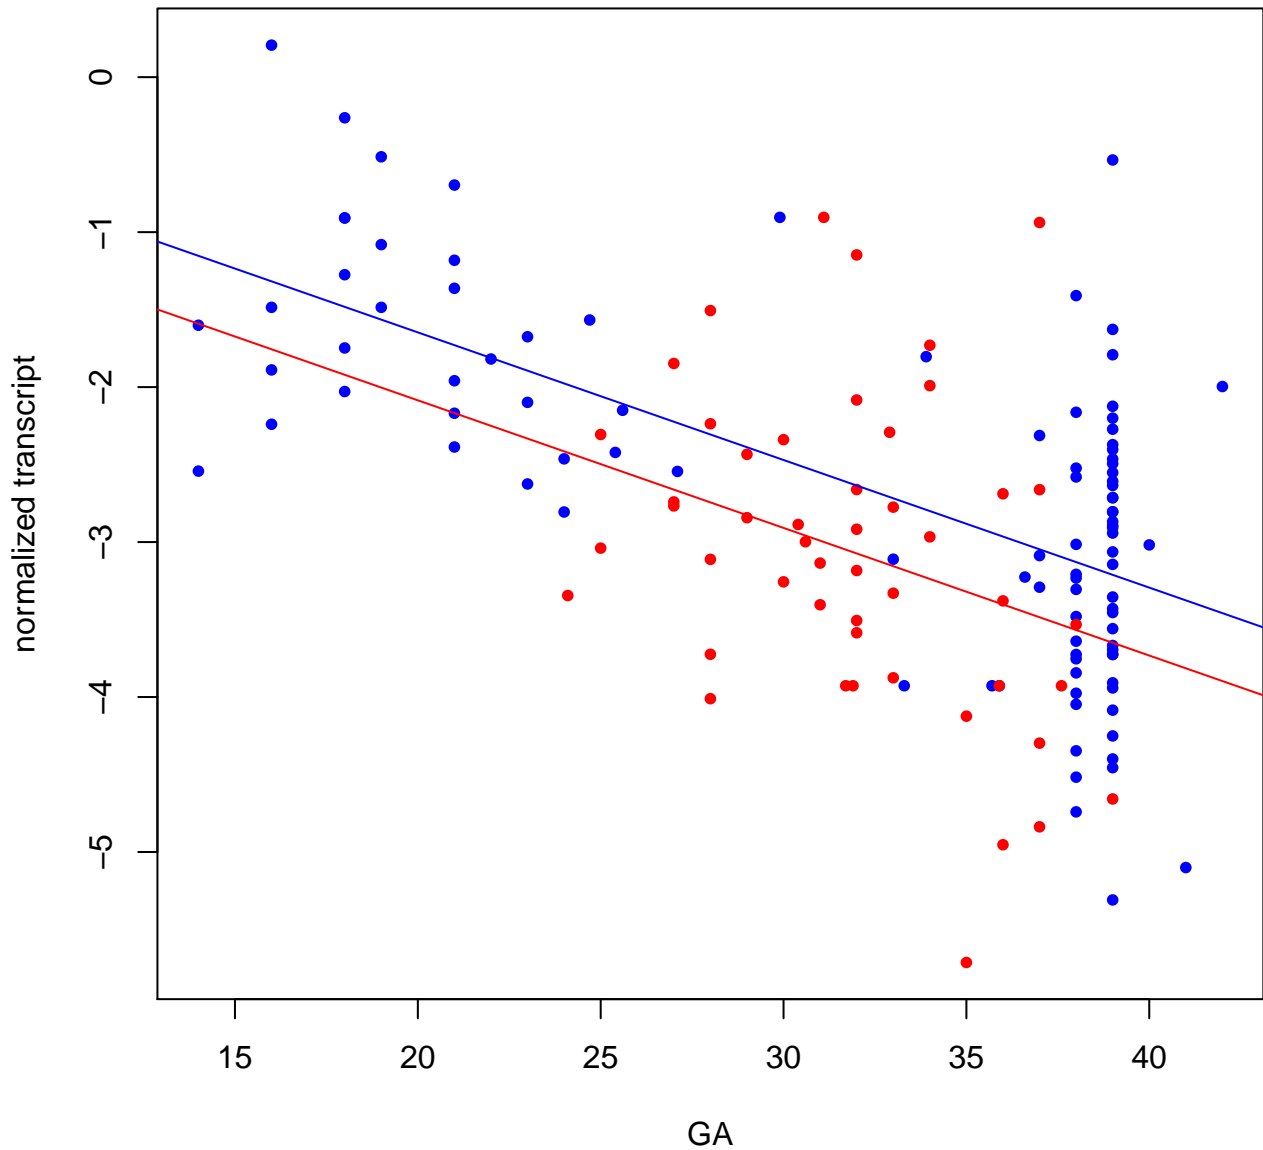

# 211148\_s\_at

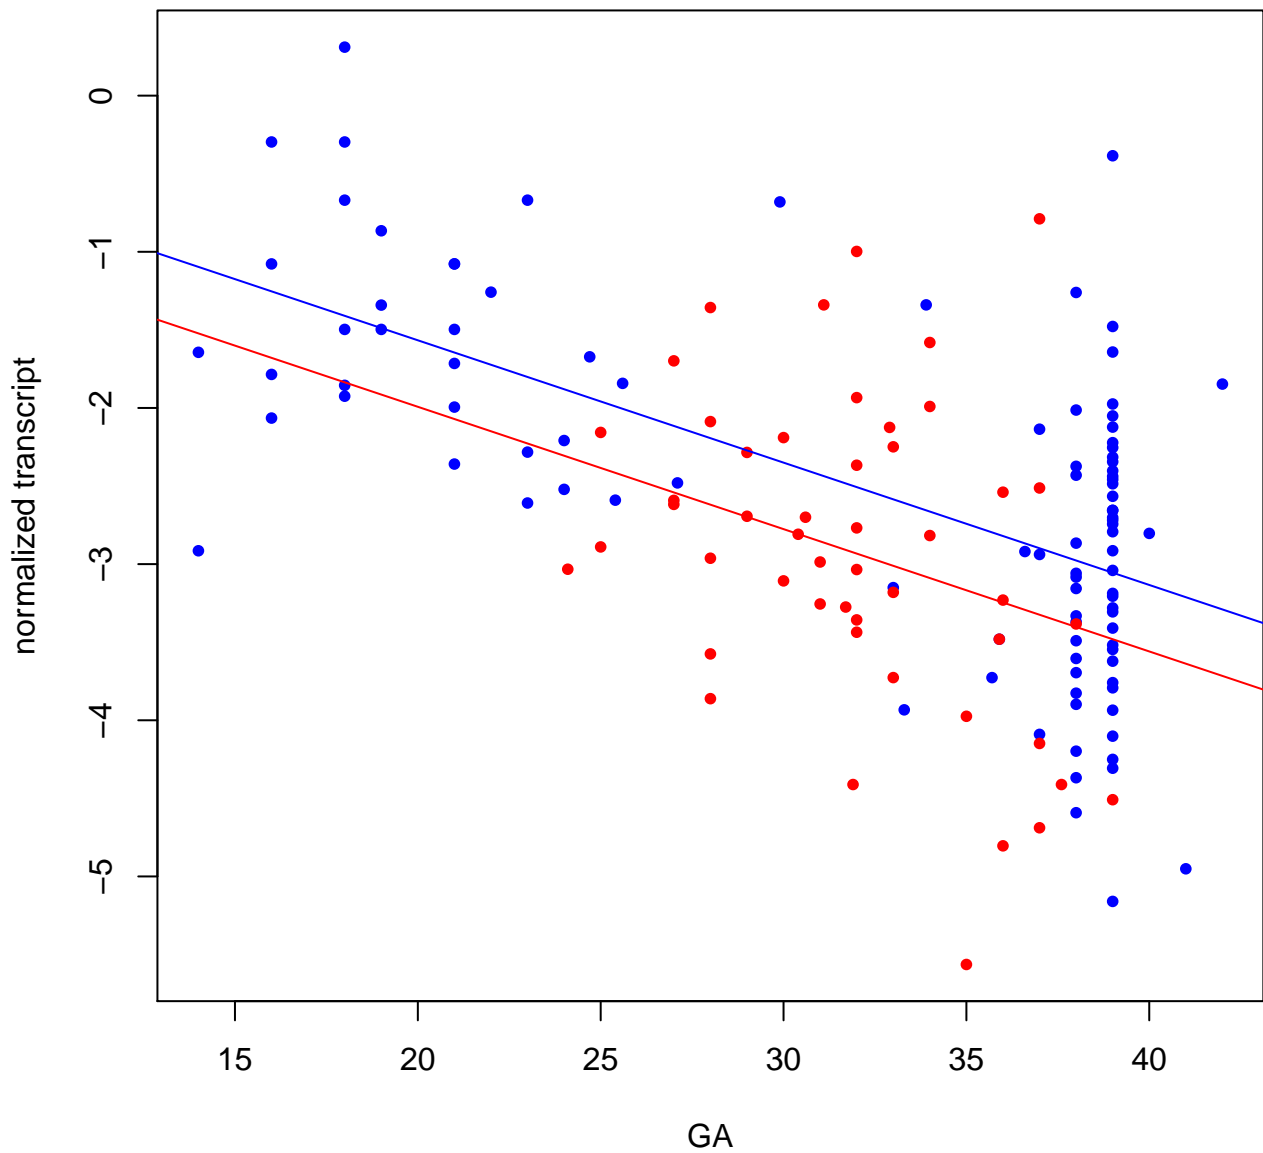

# 203107\_x\_at.3

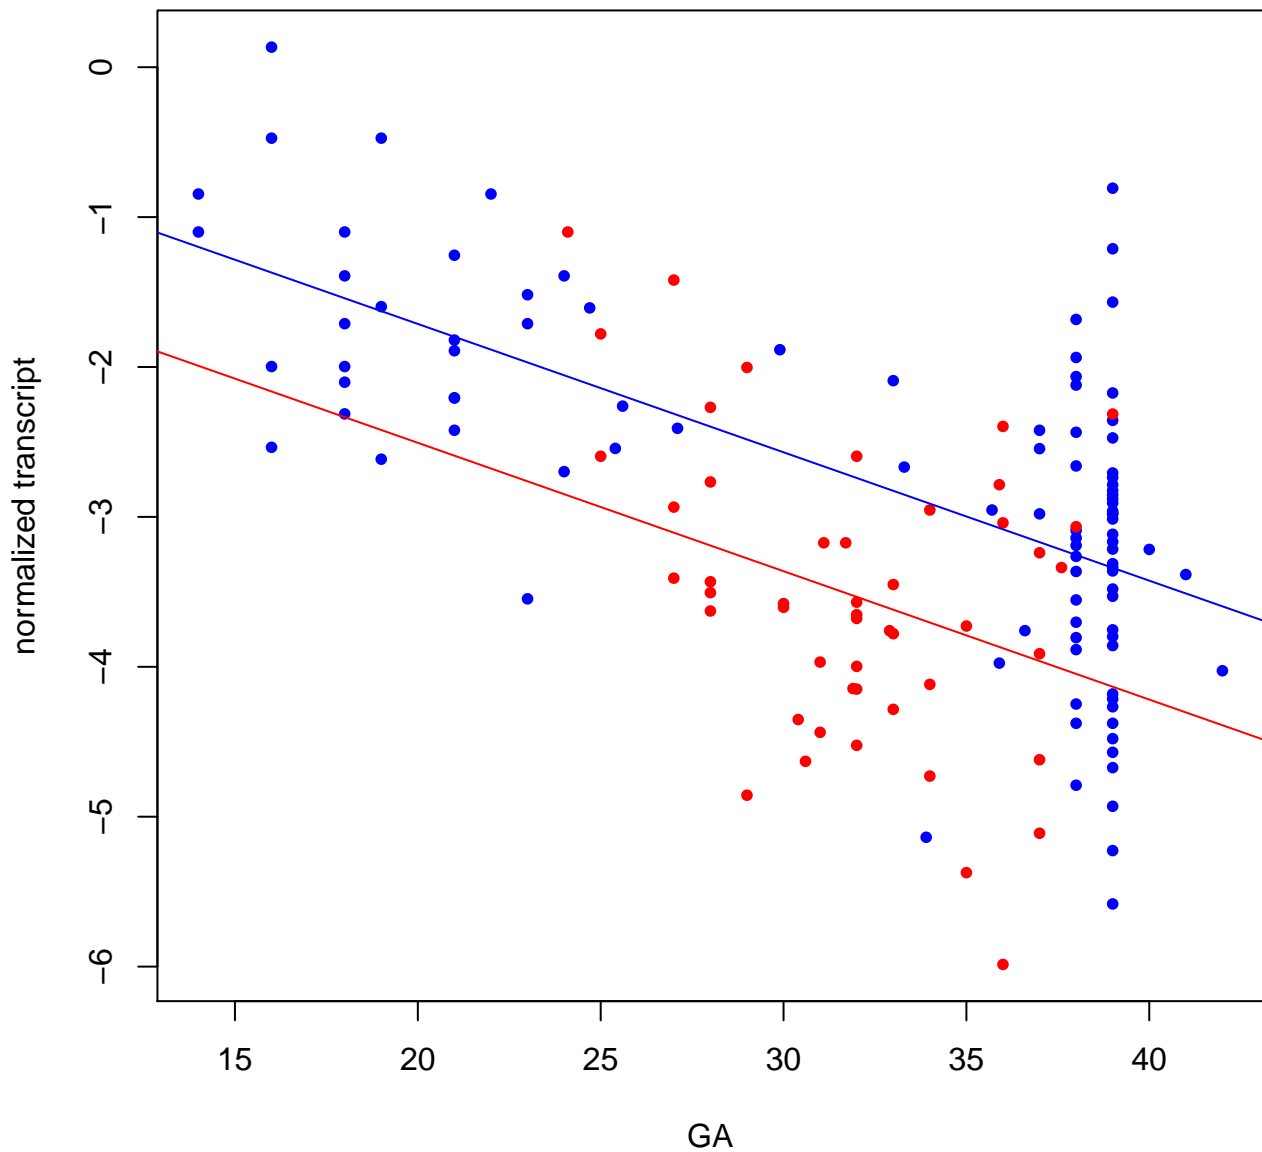



# 212433\_x\_at.3

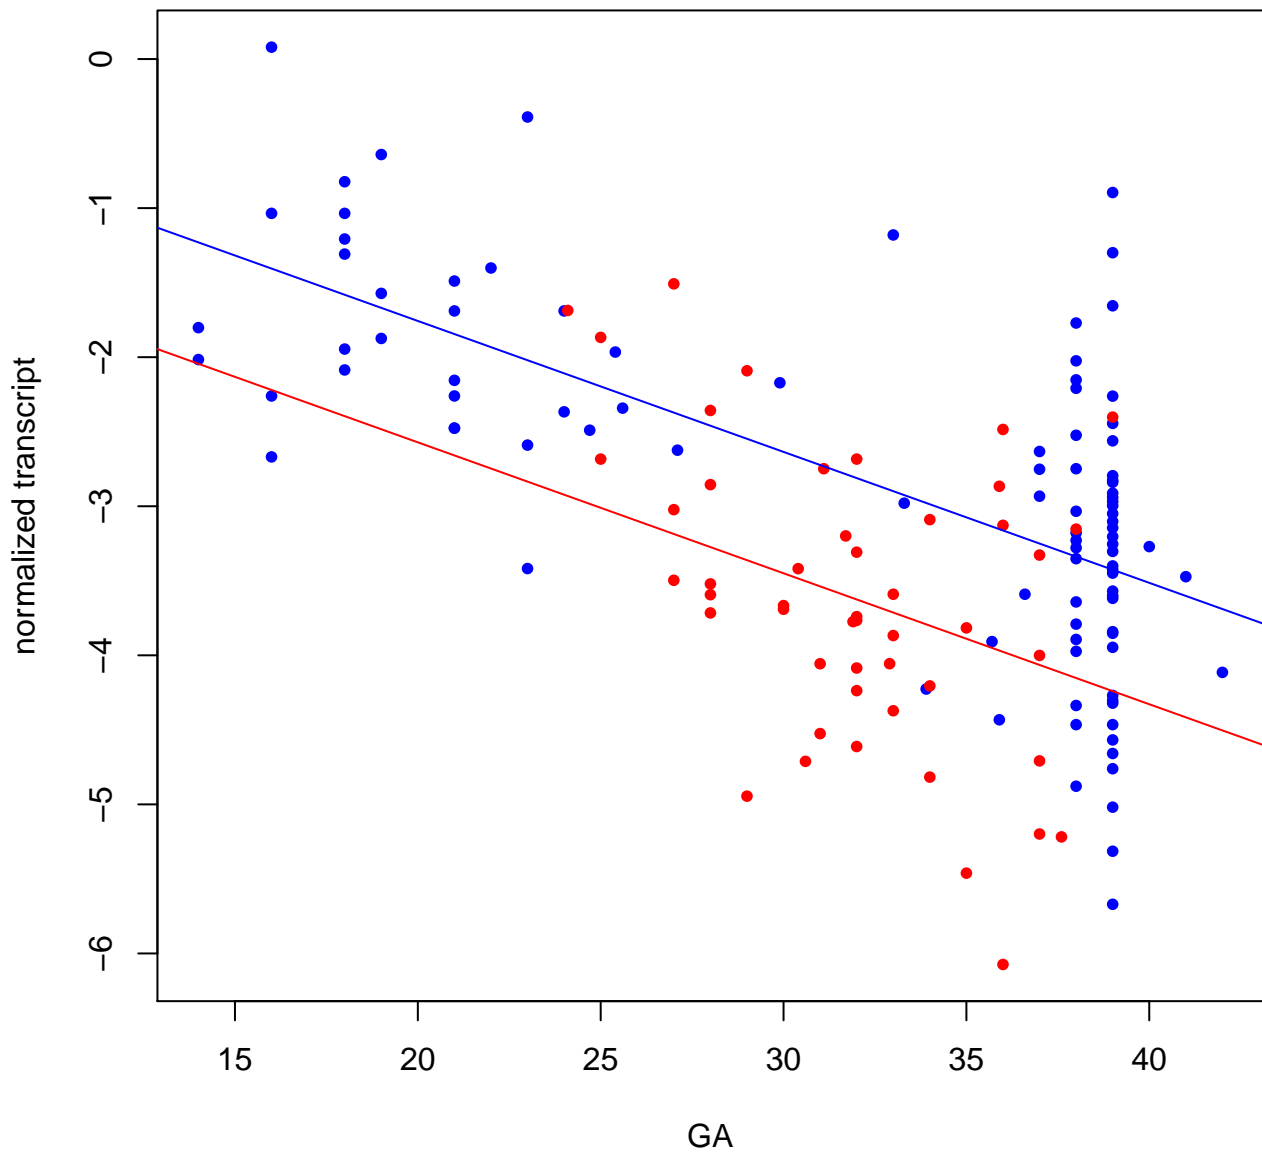

# 203107\_x\_at.4

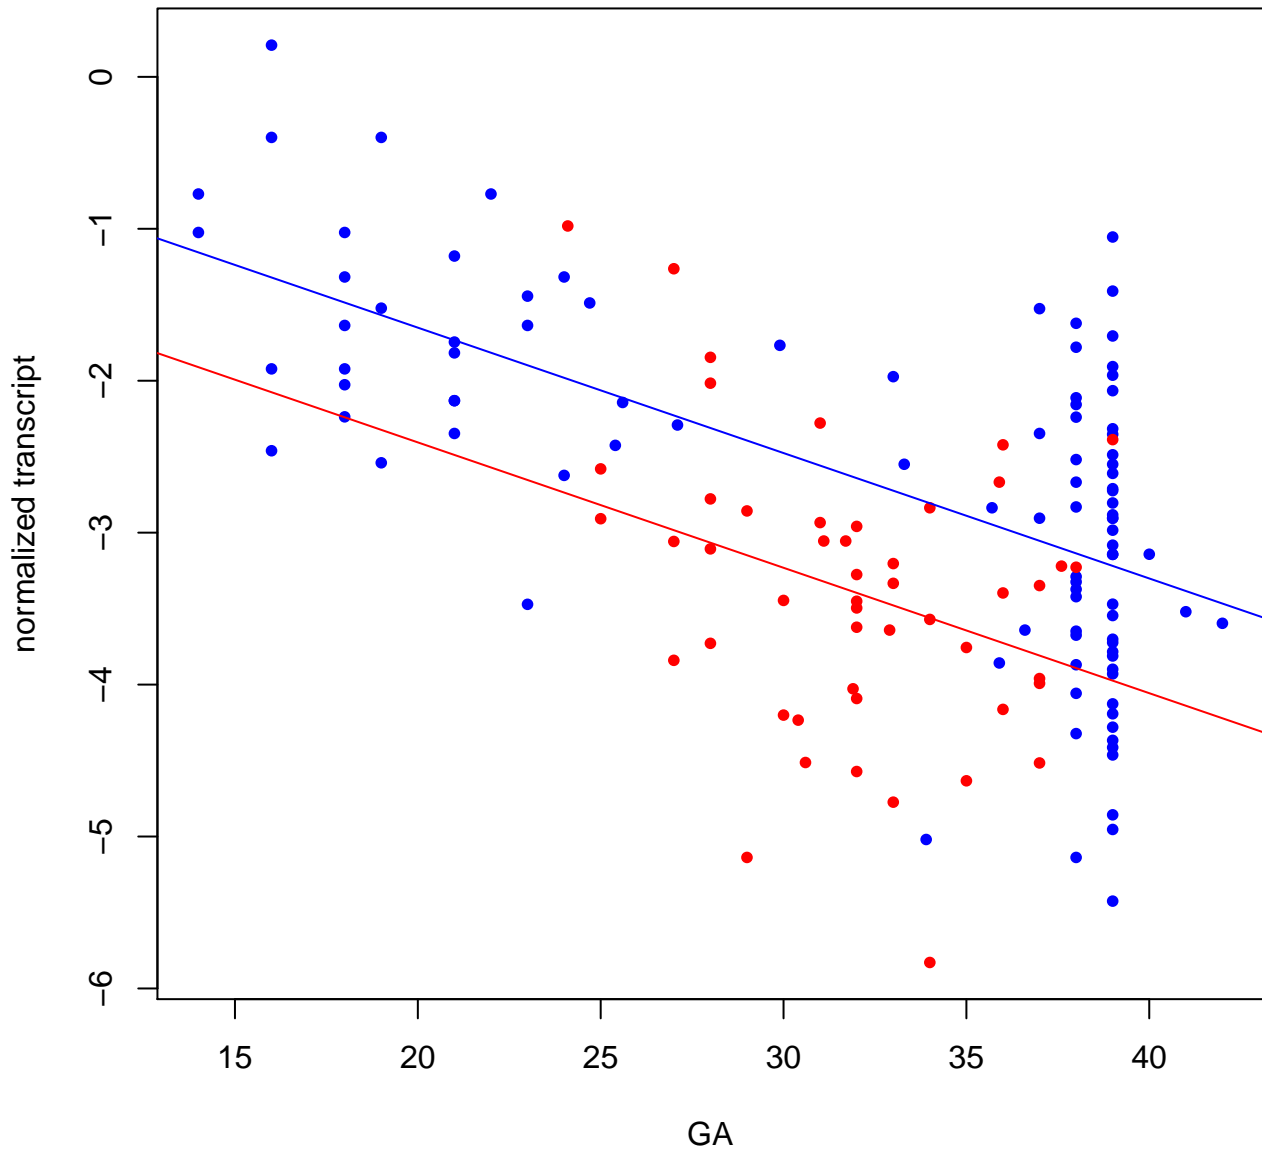

# 212433\_x\_at.4

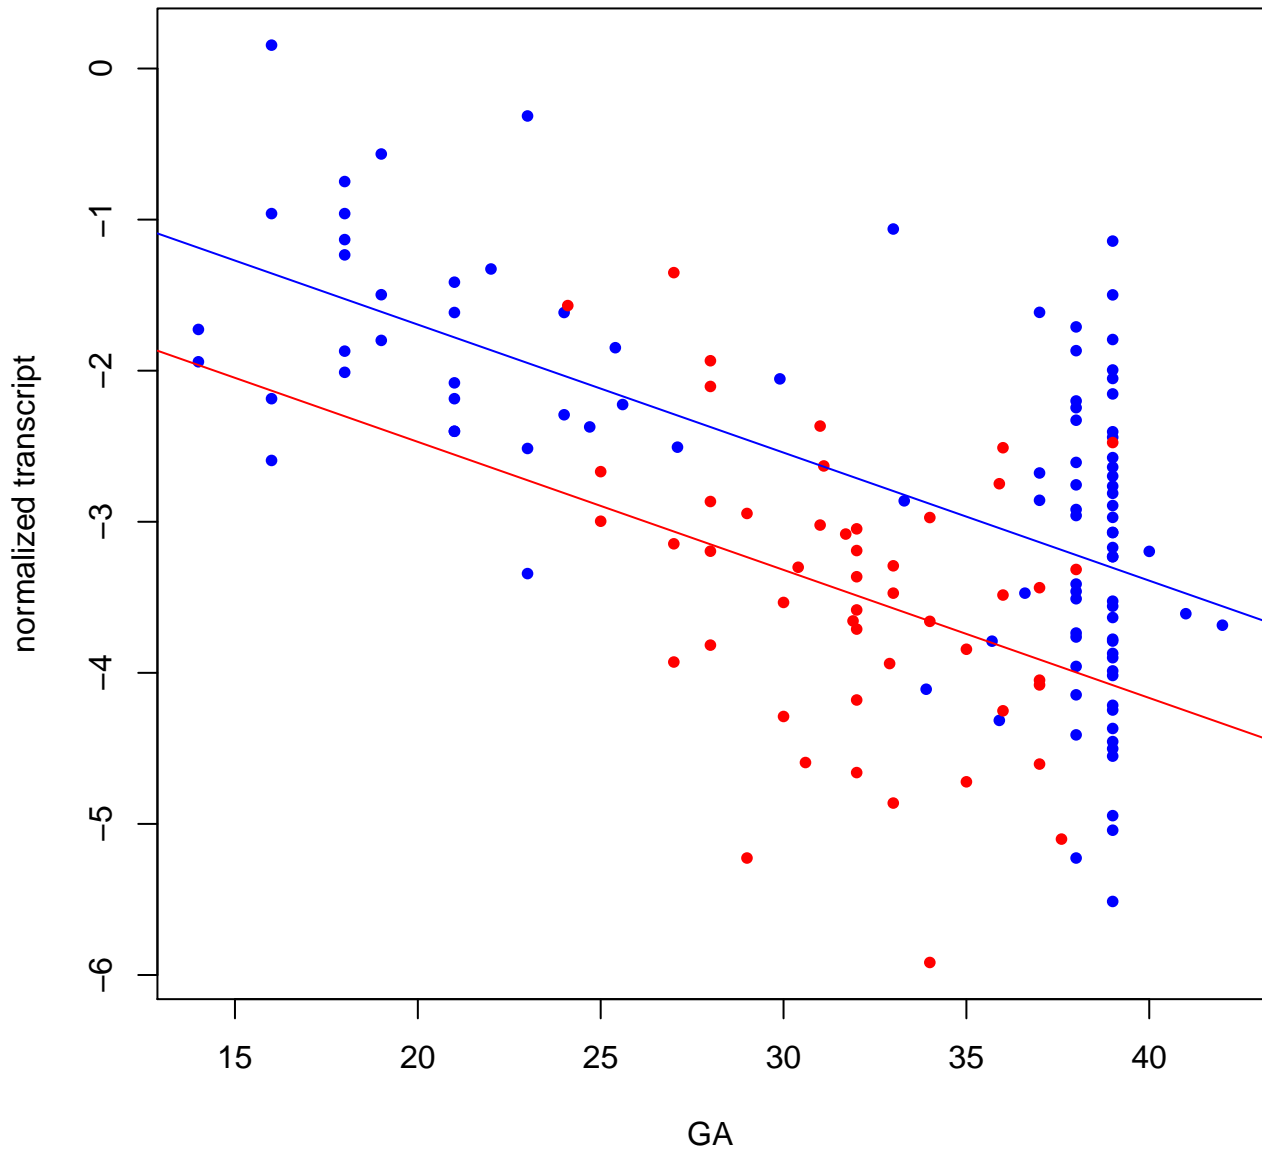

# 228479\_at

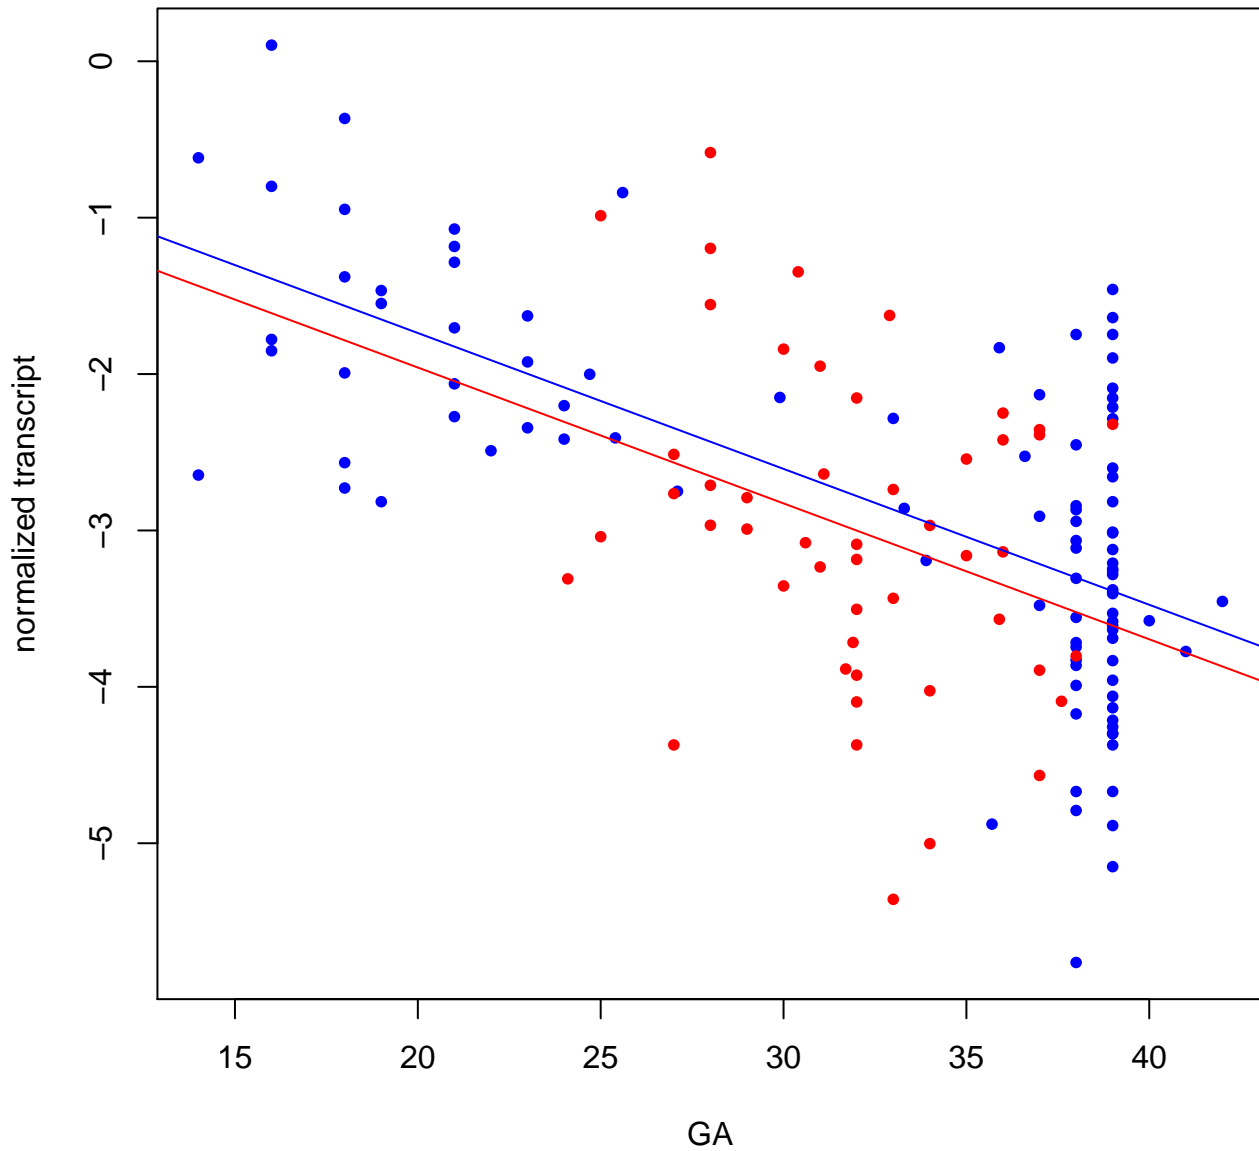

# 227280\_s\_at

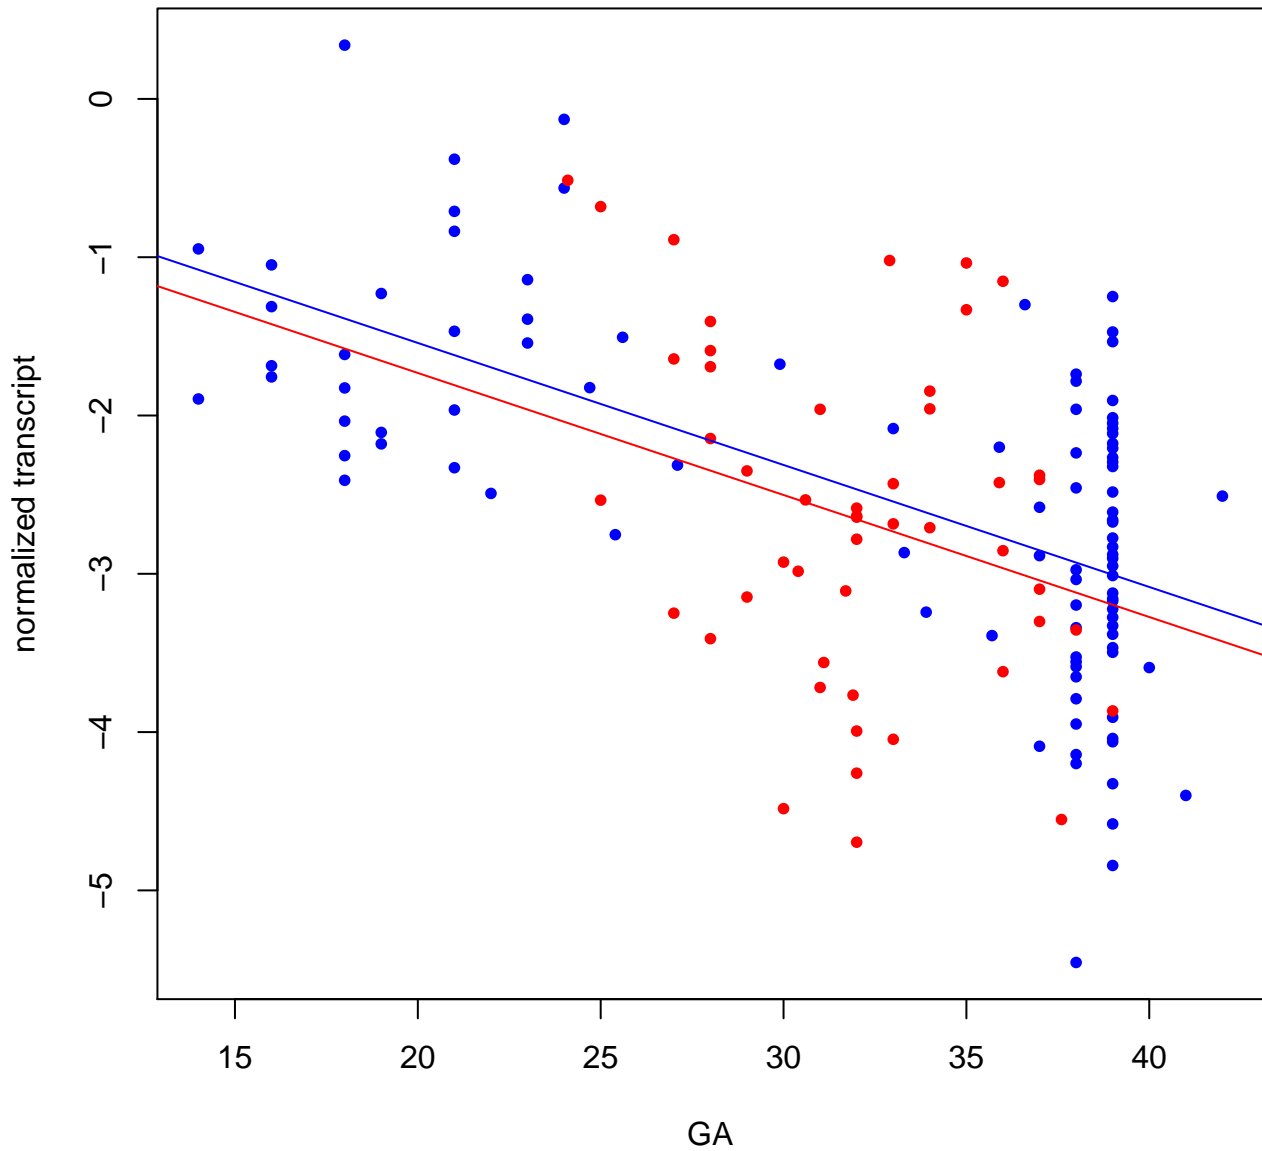

# 225295\_at

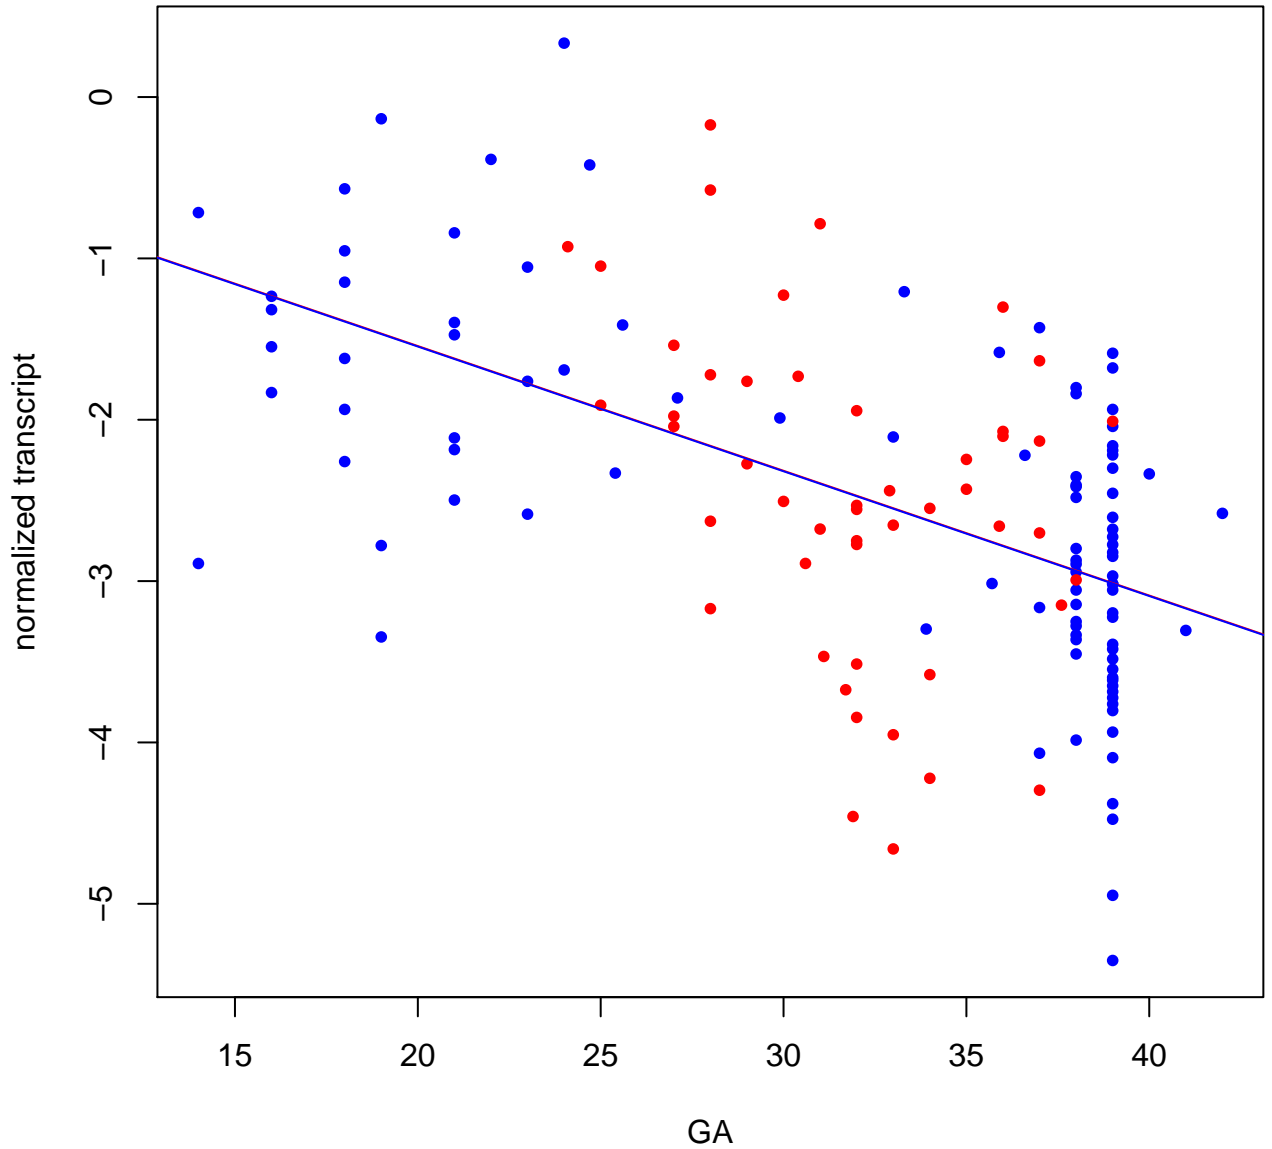

# 226763\_at

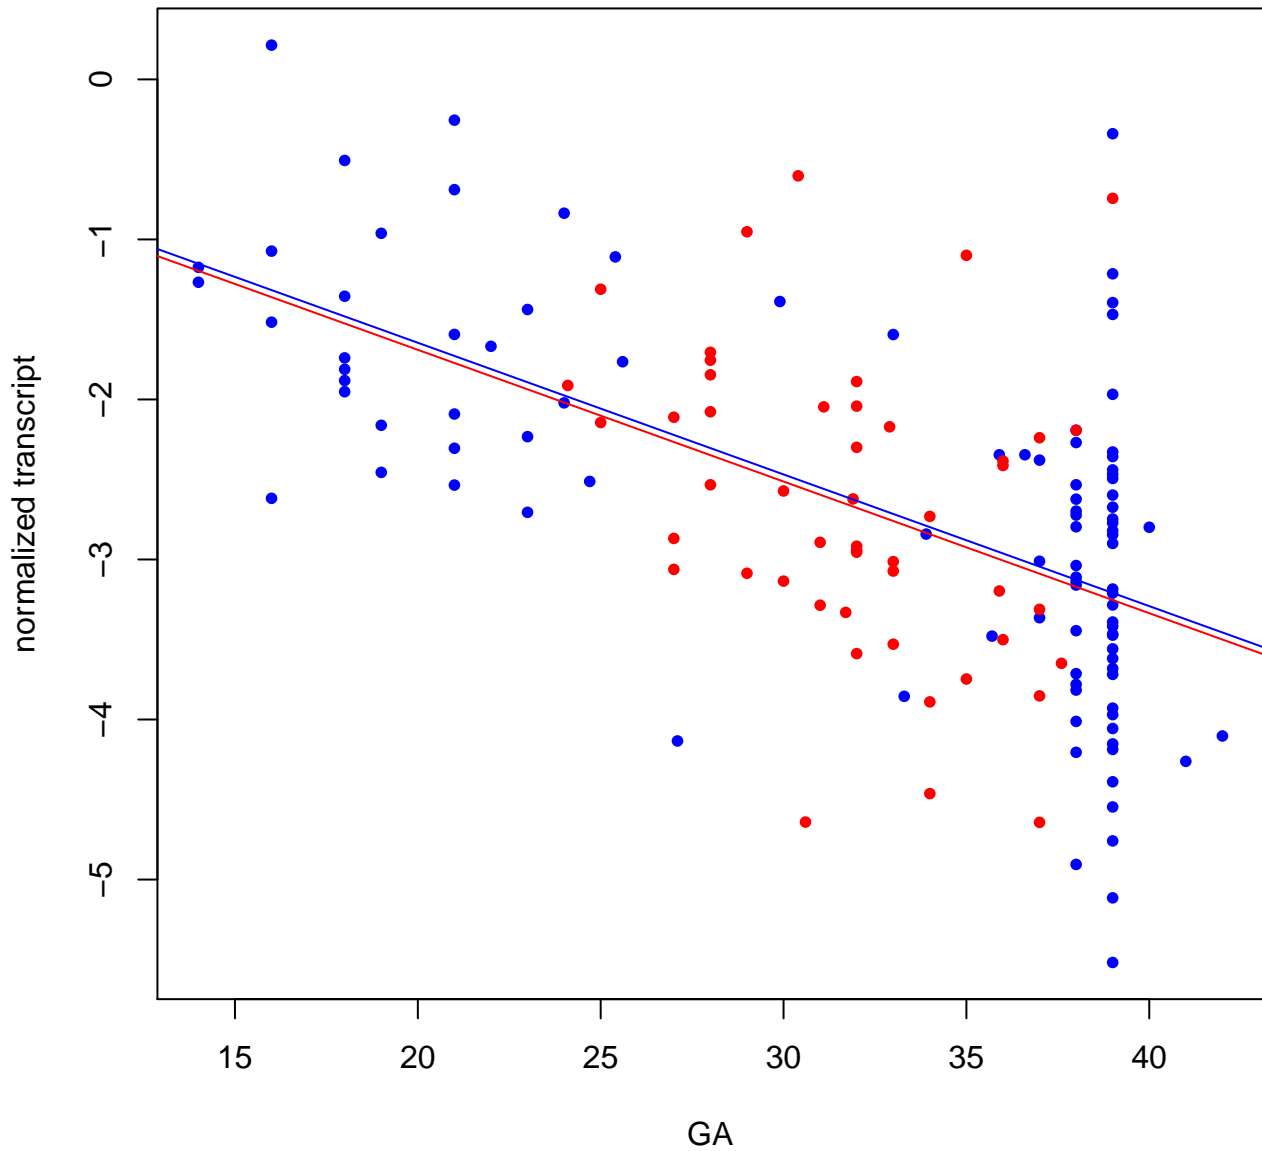





# 227155\_at

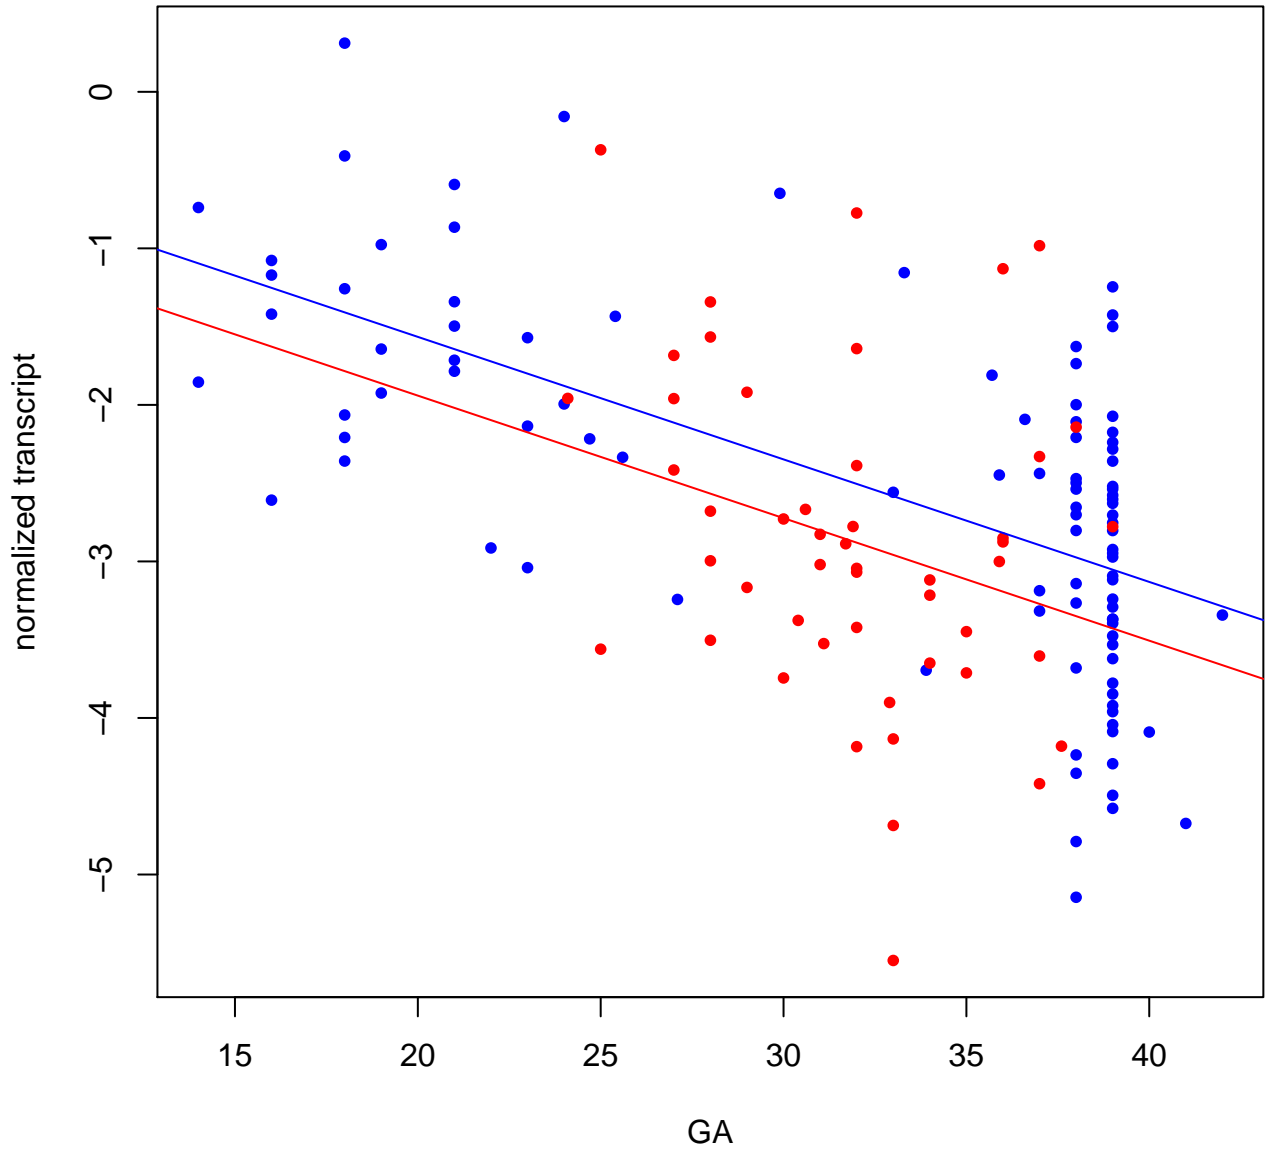



# 225259\_at

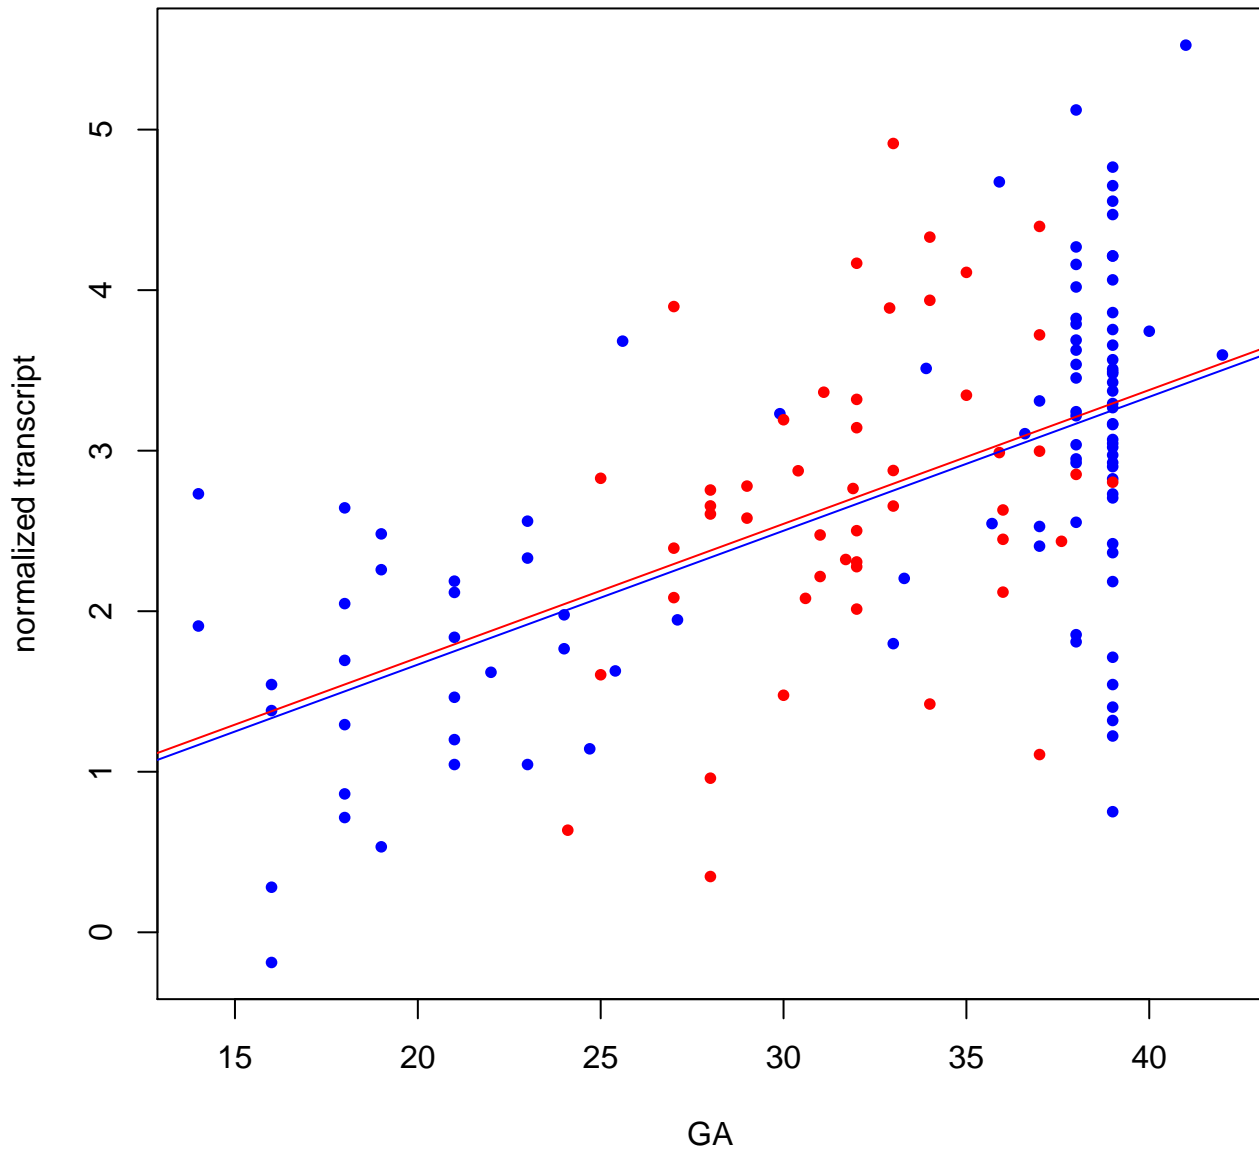

# 226907\_at

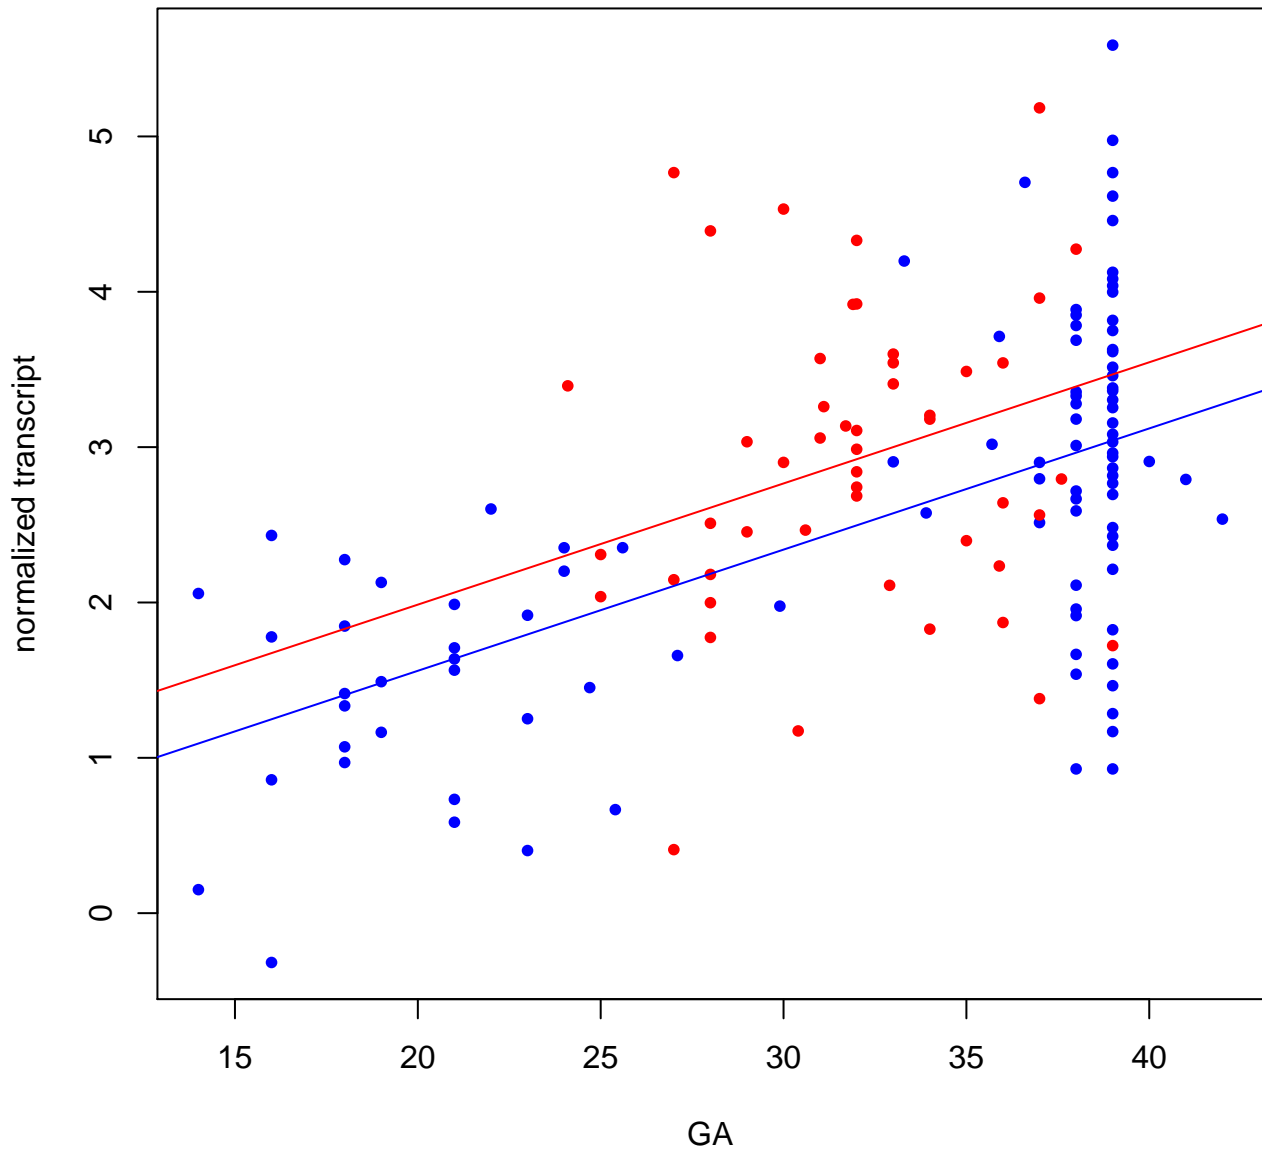

# 226028\_at

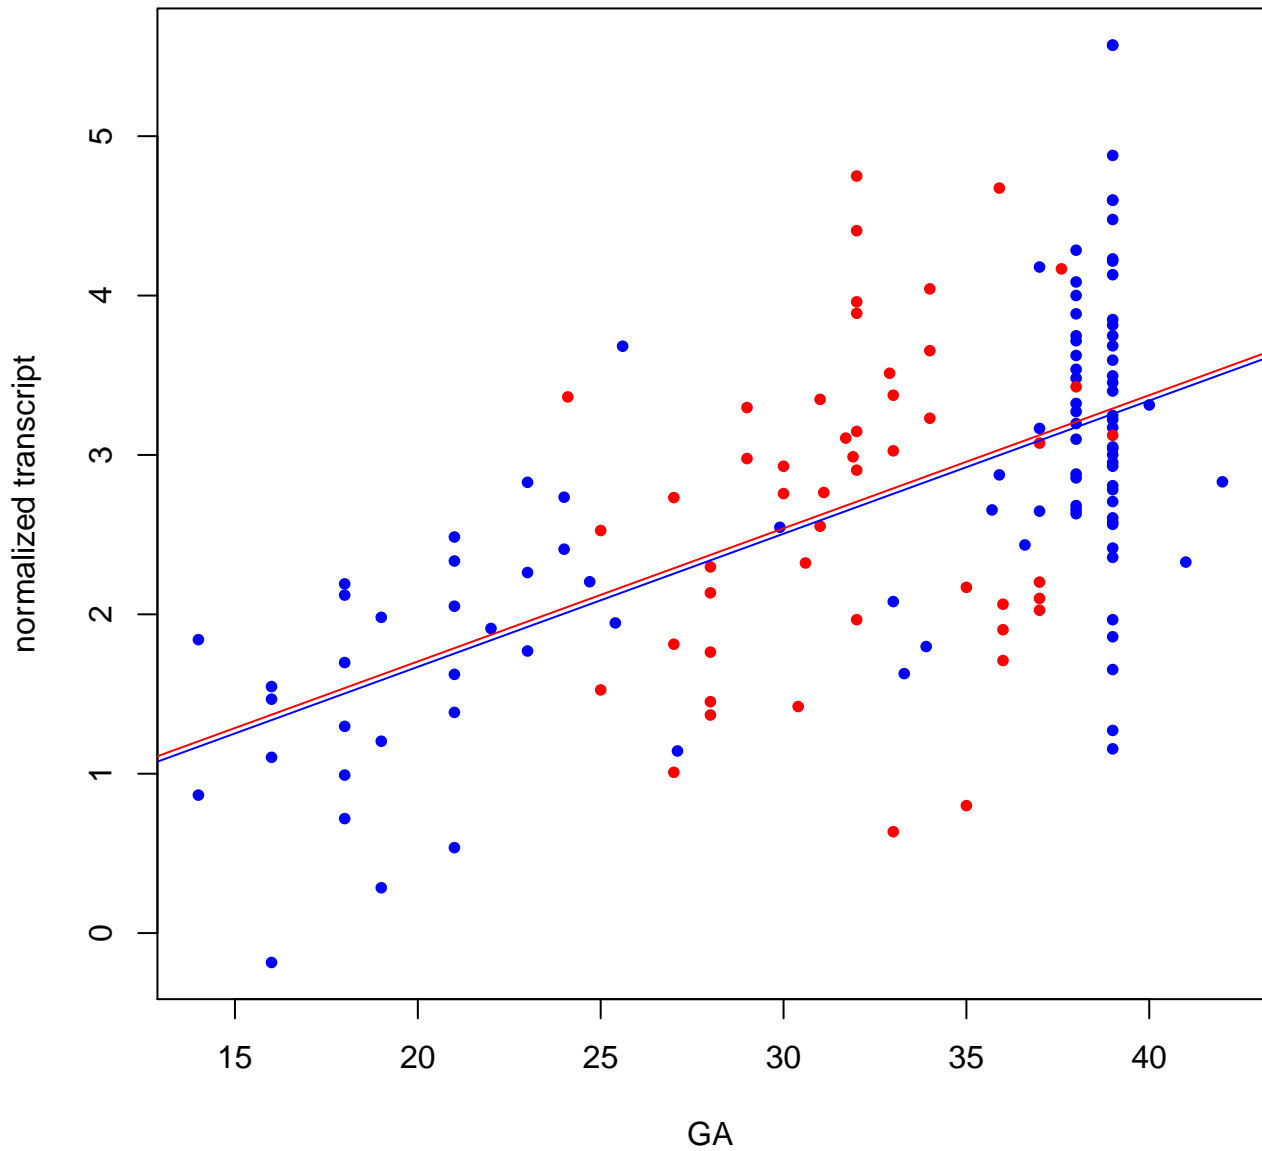

# 226043\_at

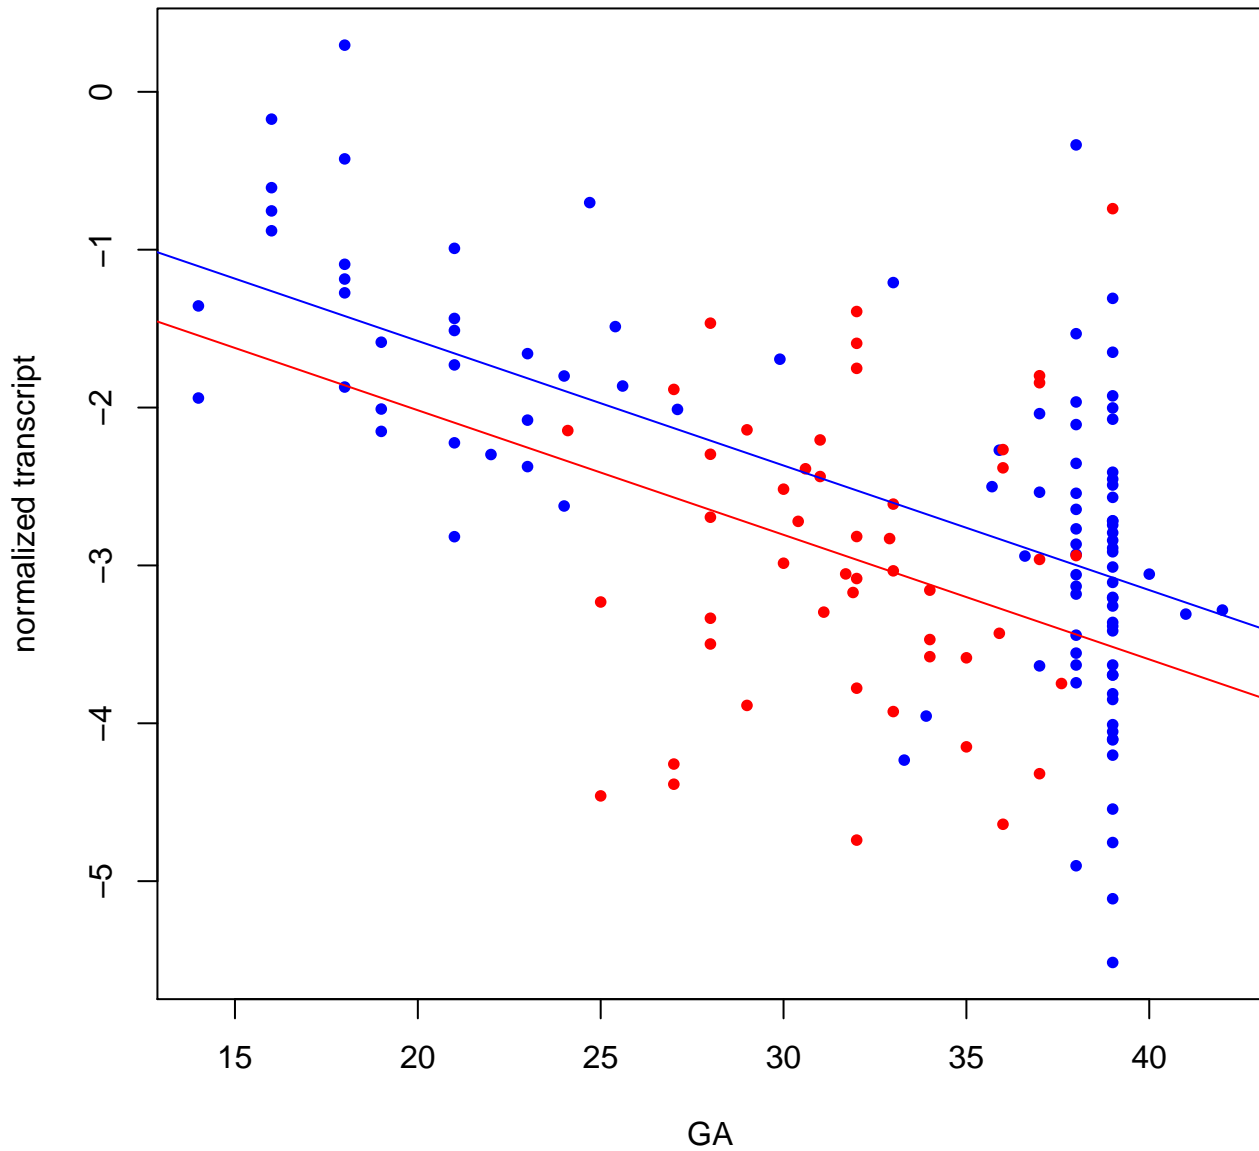



# 226043\_at.2

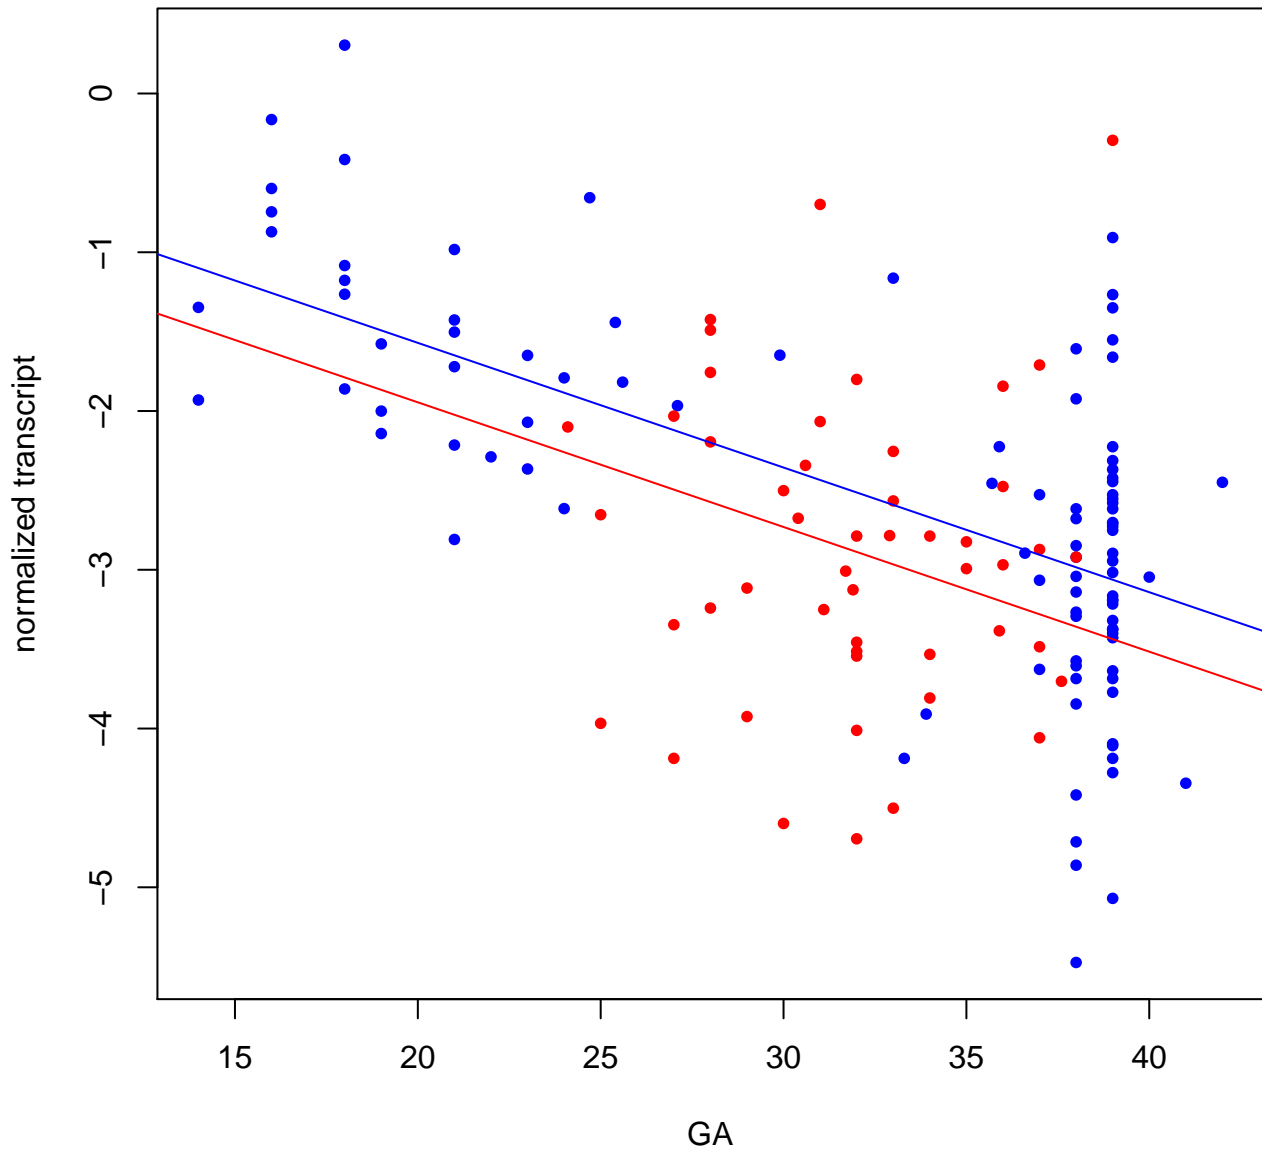





# 225646\_at

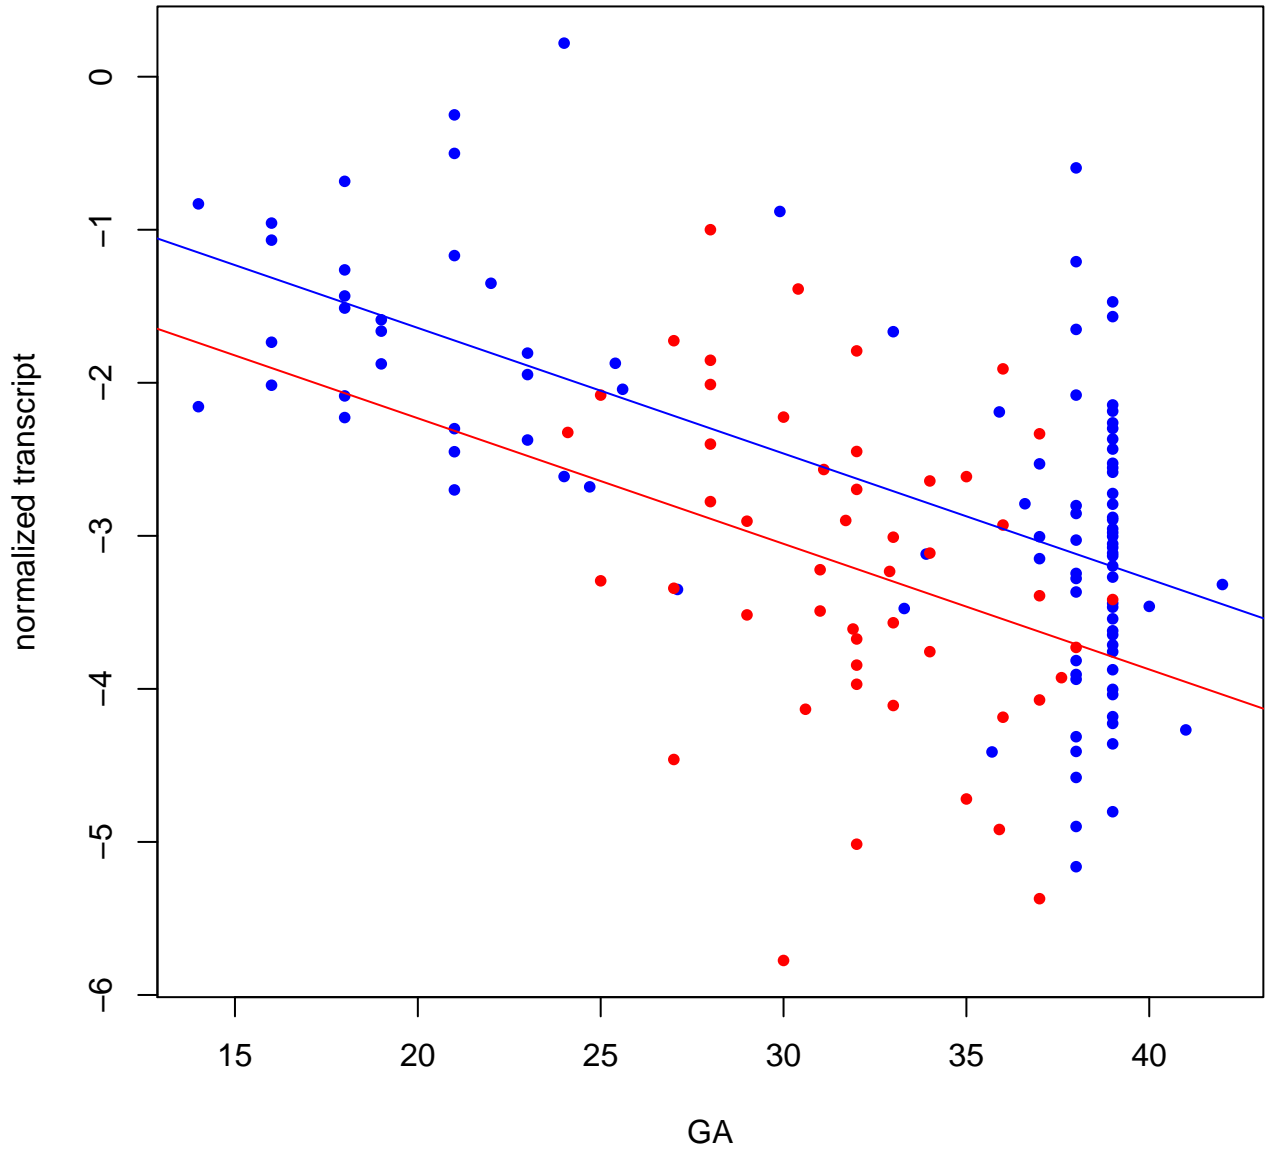

# 225646\_at.1

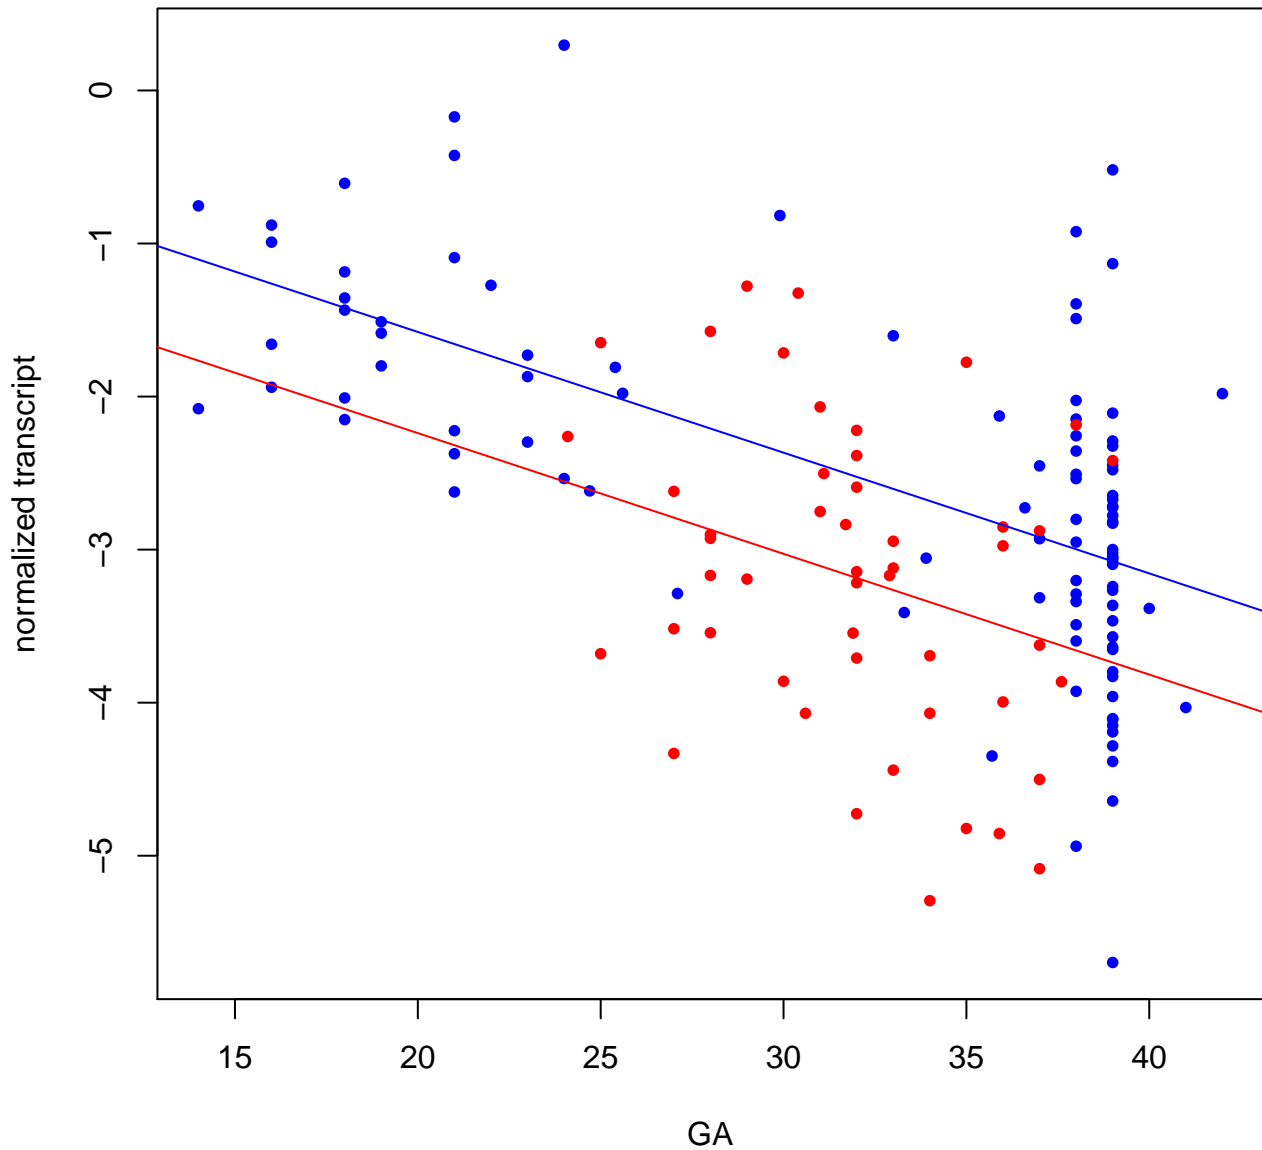

# 225274\_at

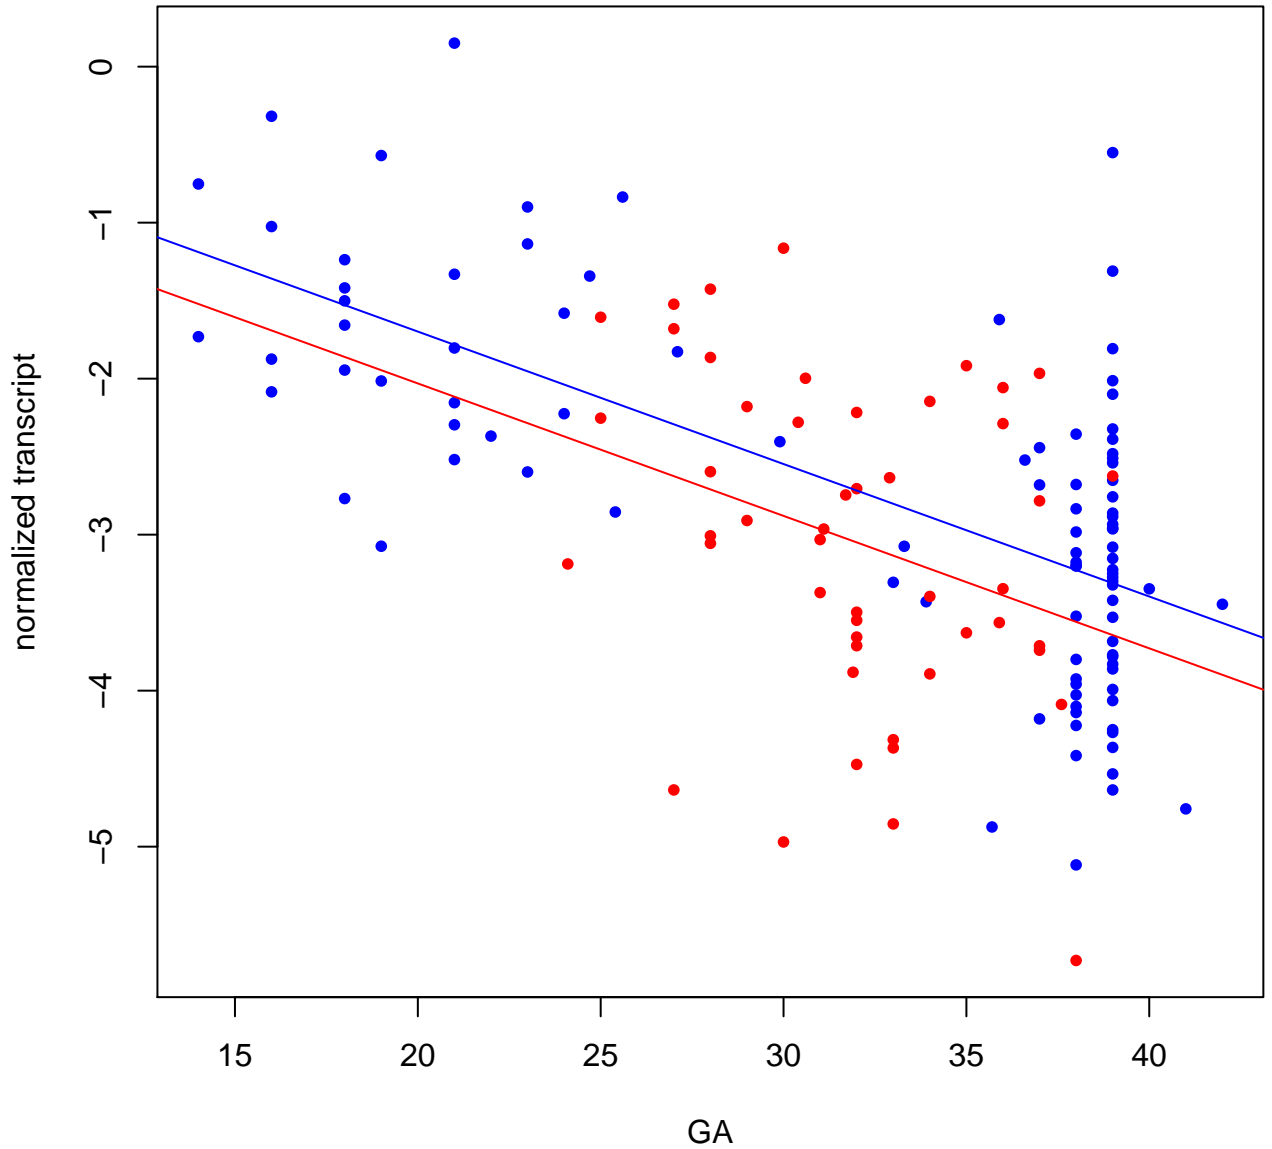

# 225935\_at

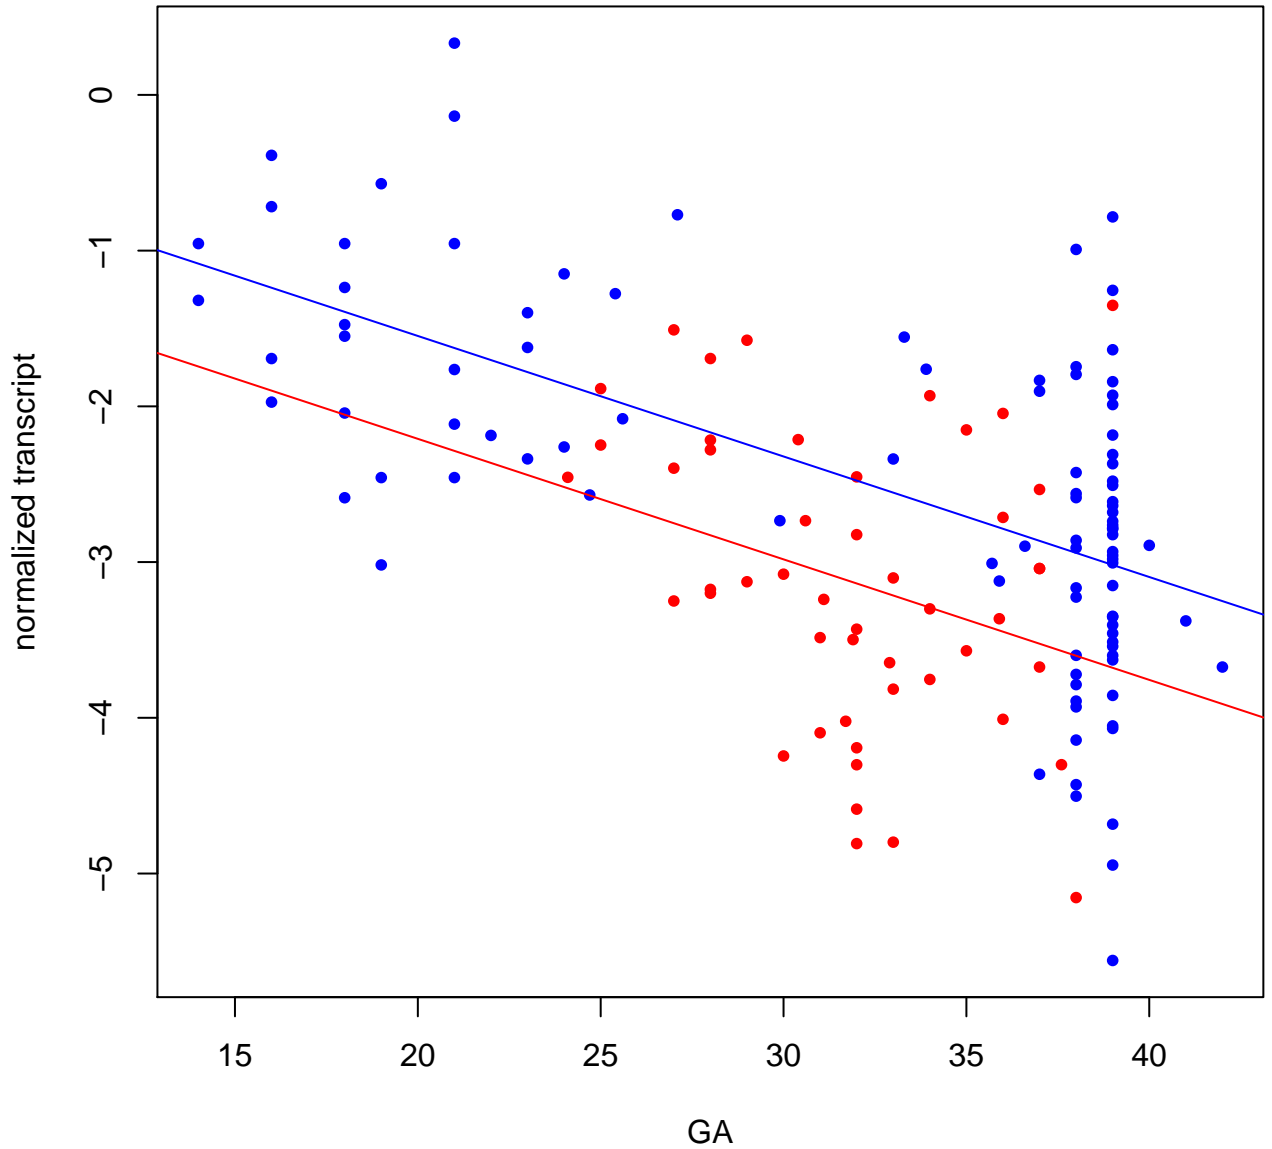

# 225221\_at

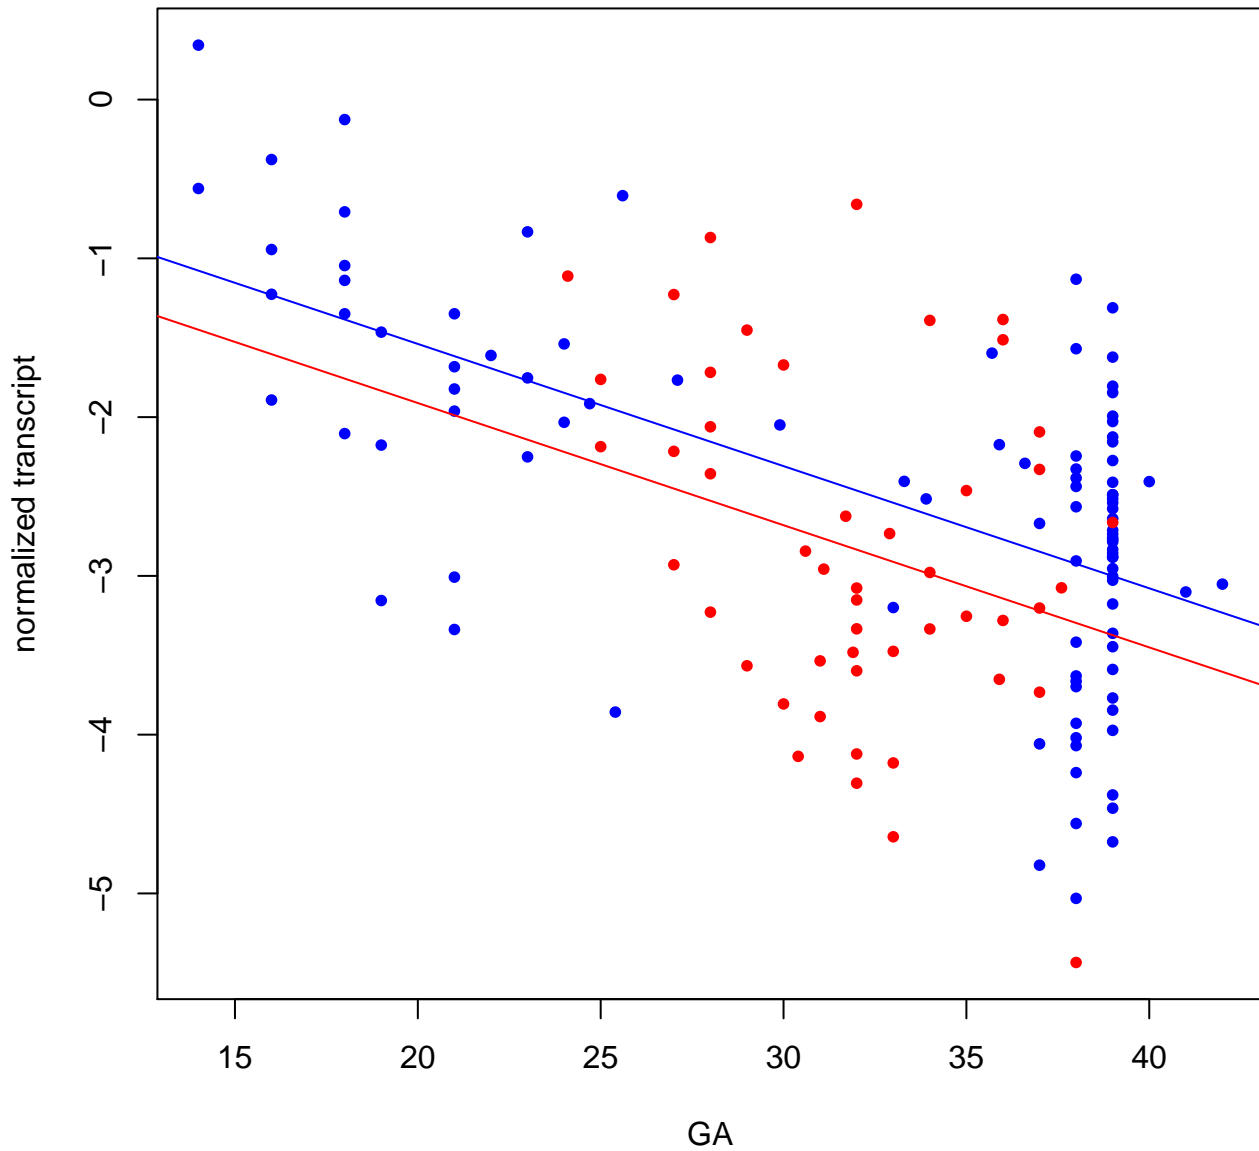

# 226137\_at

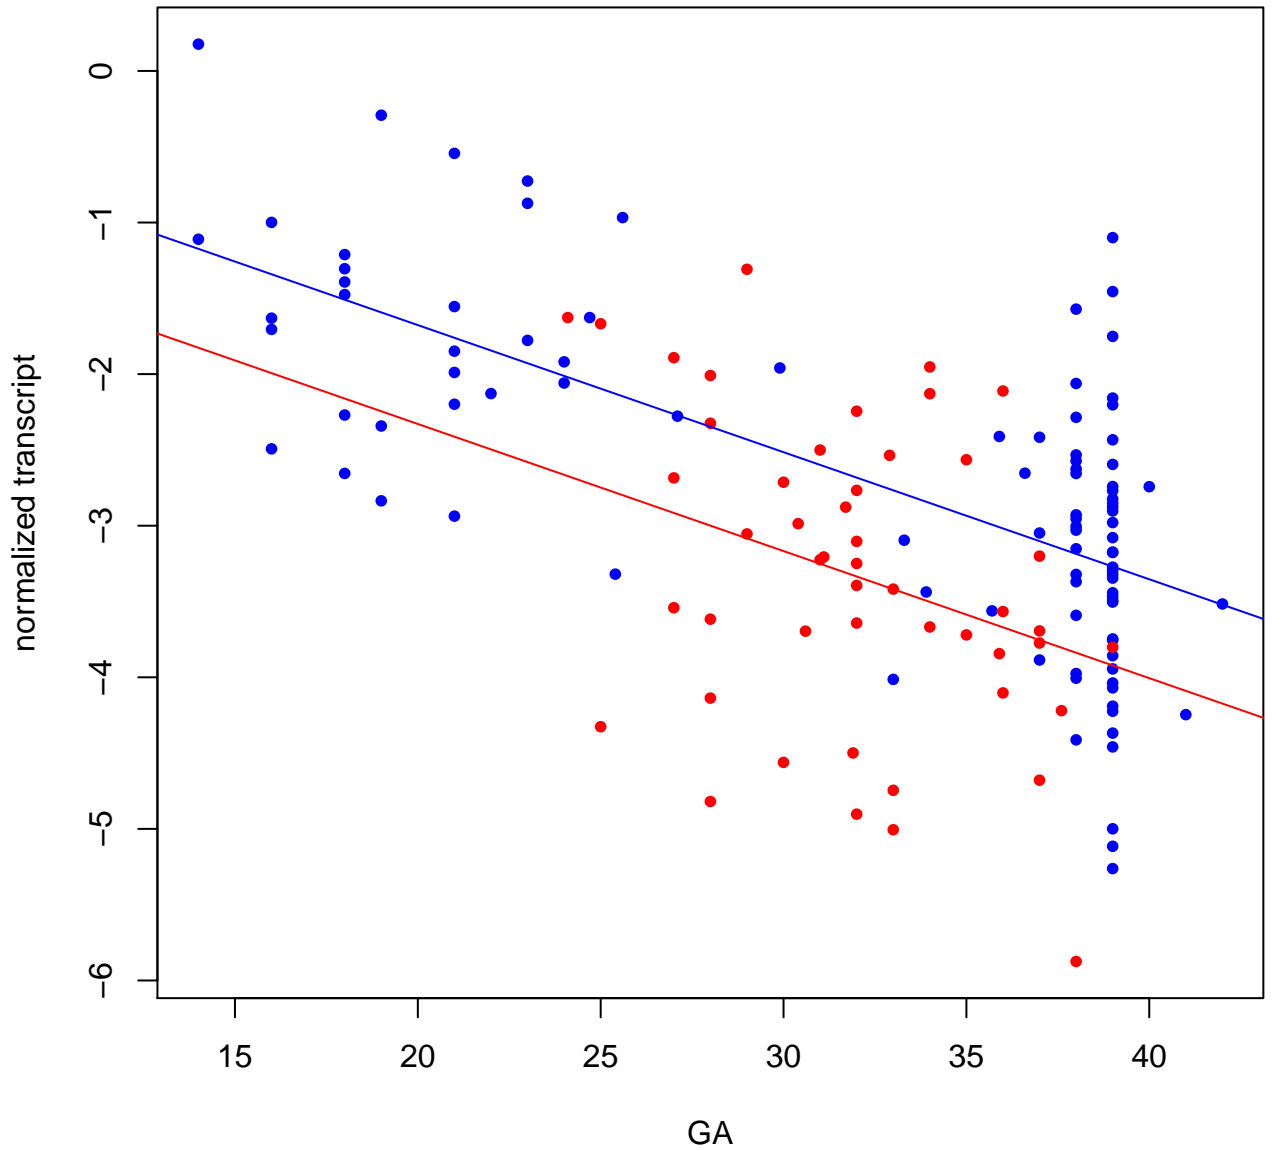

# 243161\_x\_at

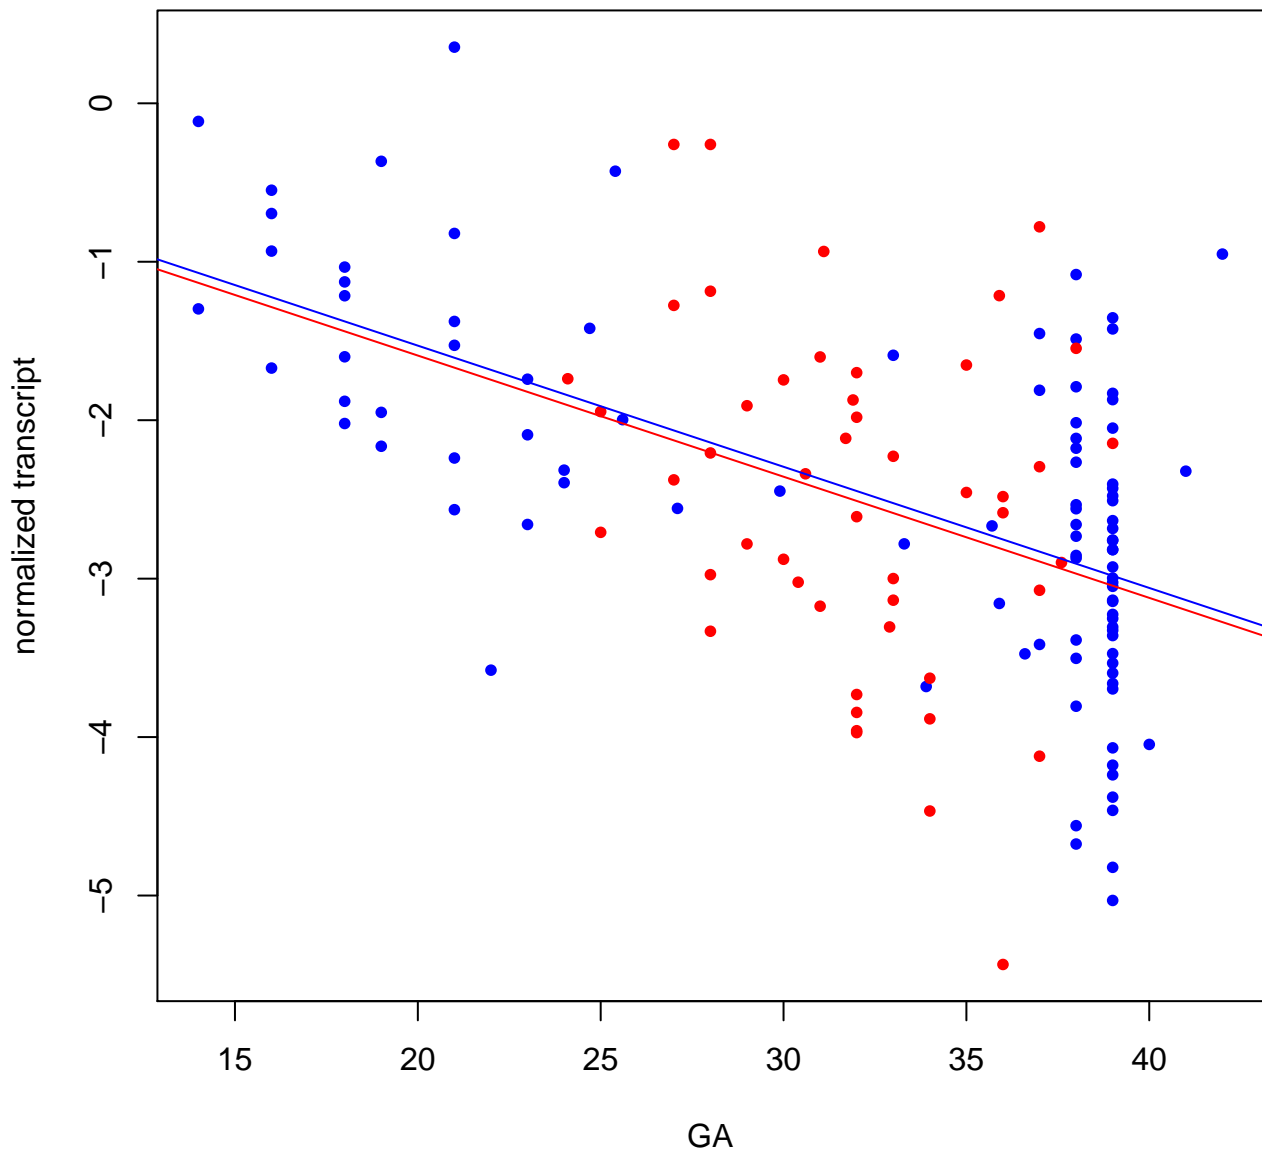





# 226435\_at

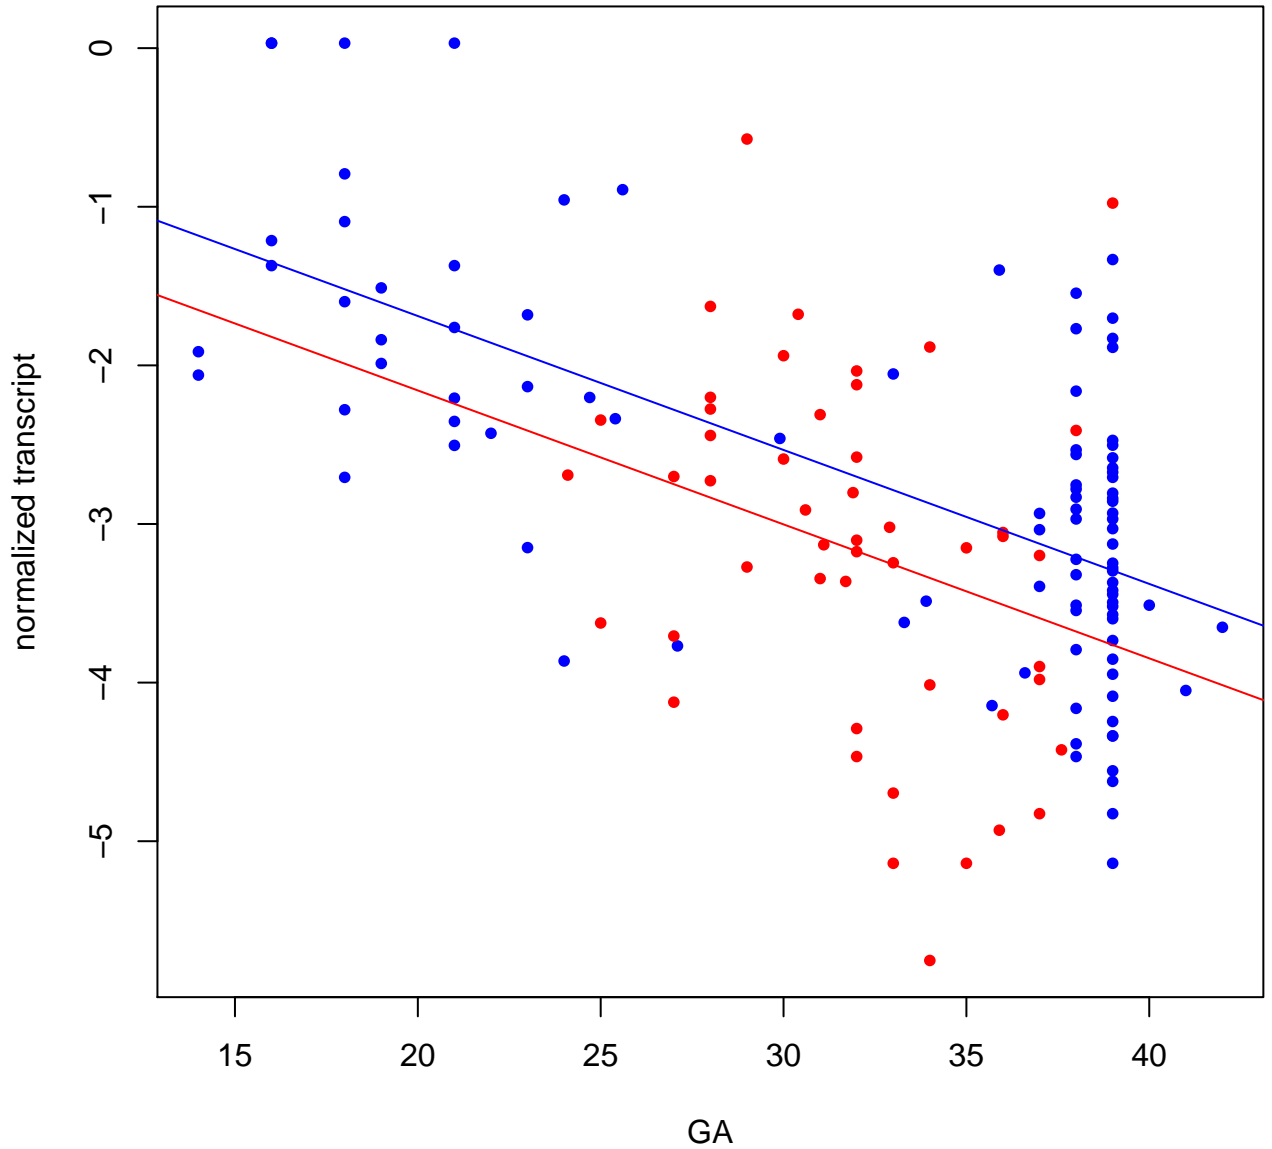



# 226358\_at.1

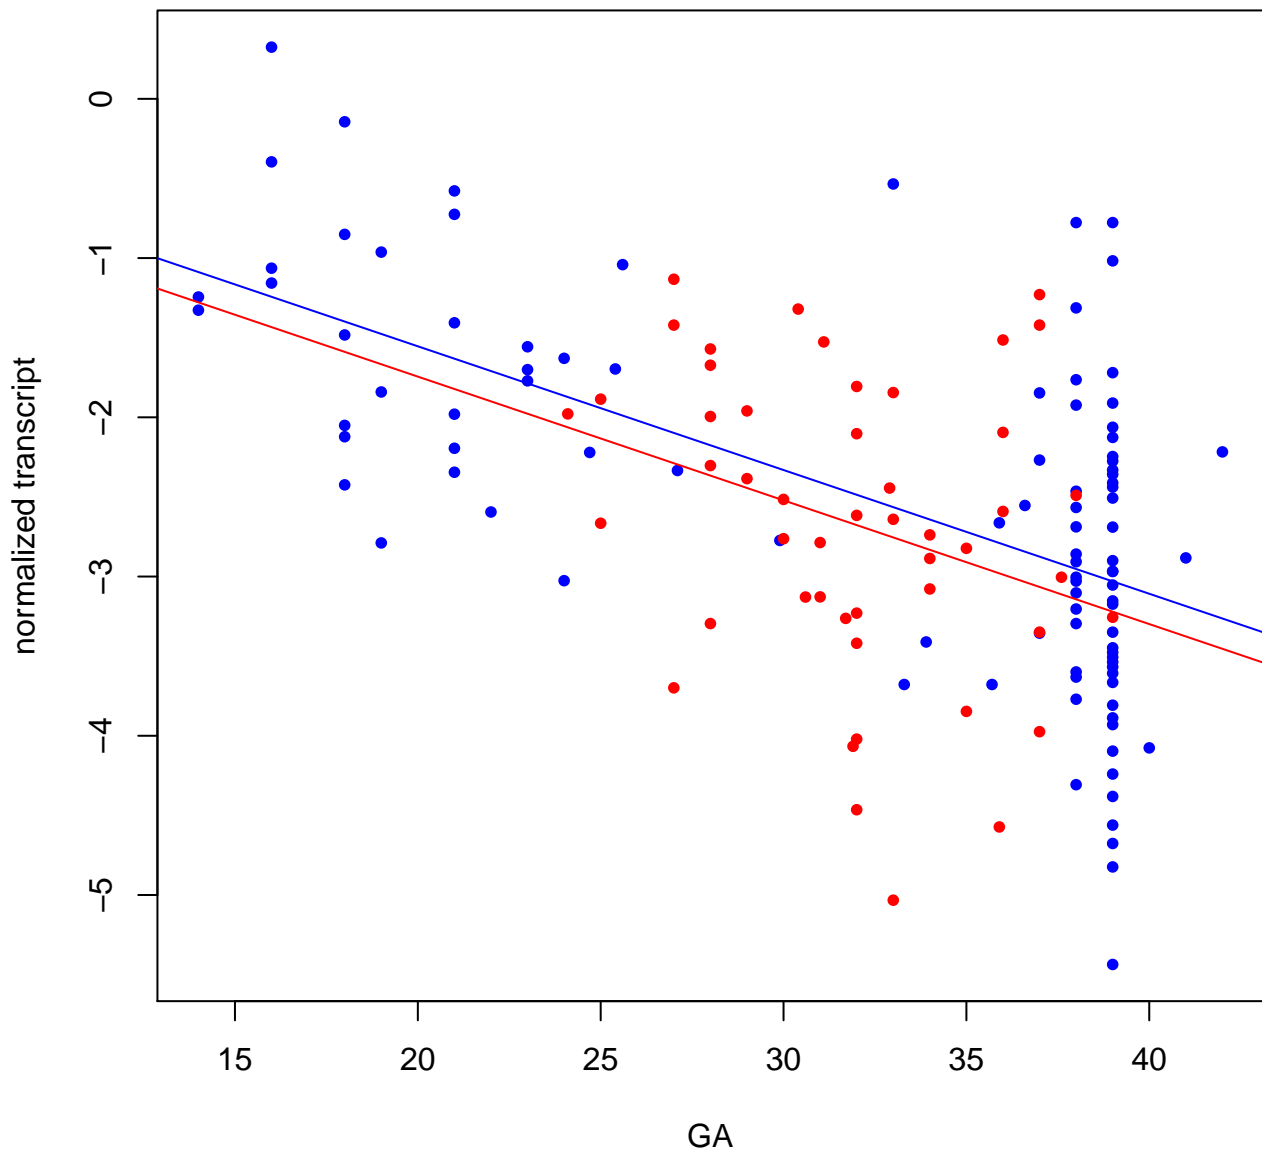

# 228293\_at

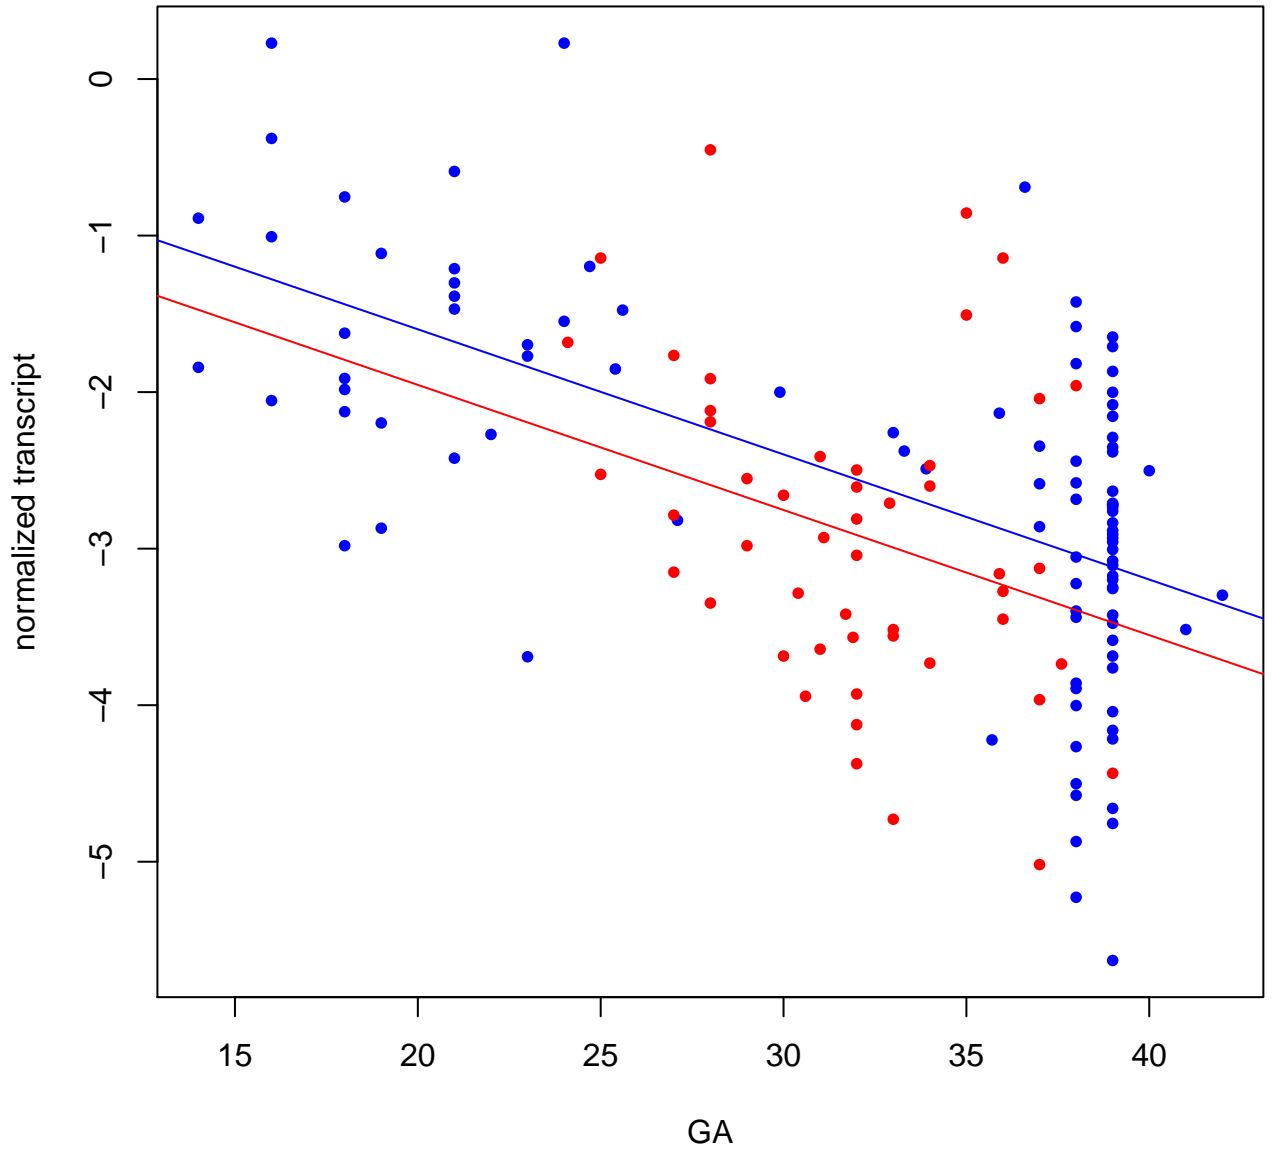

# 230728\_at

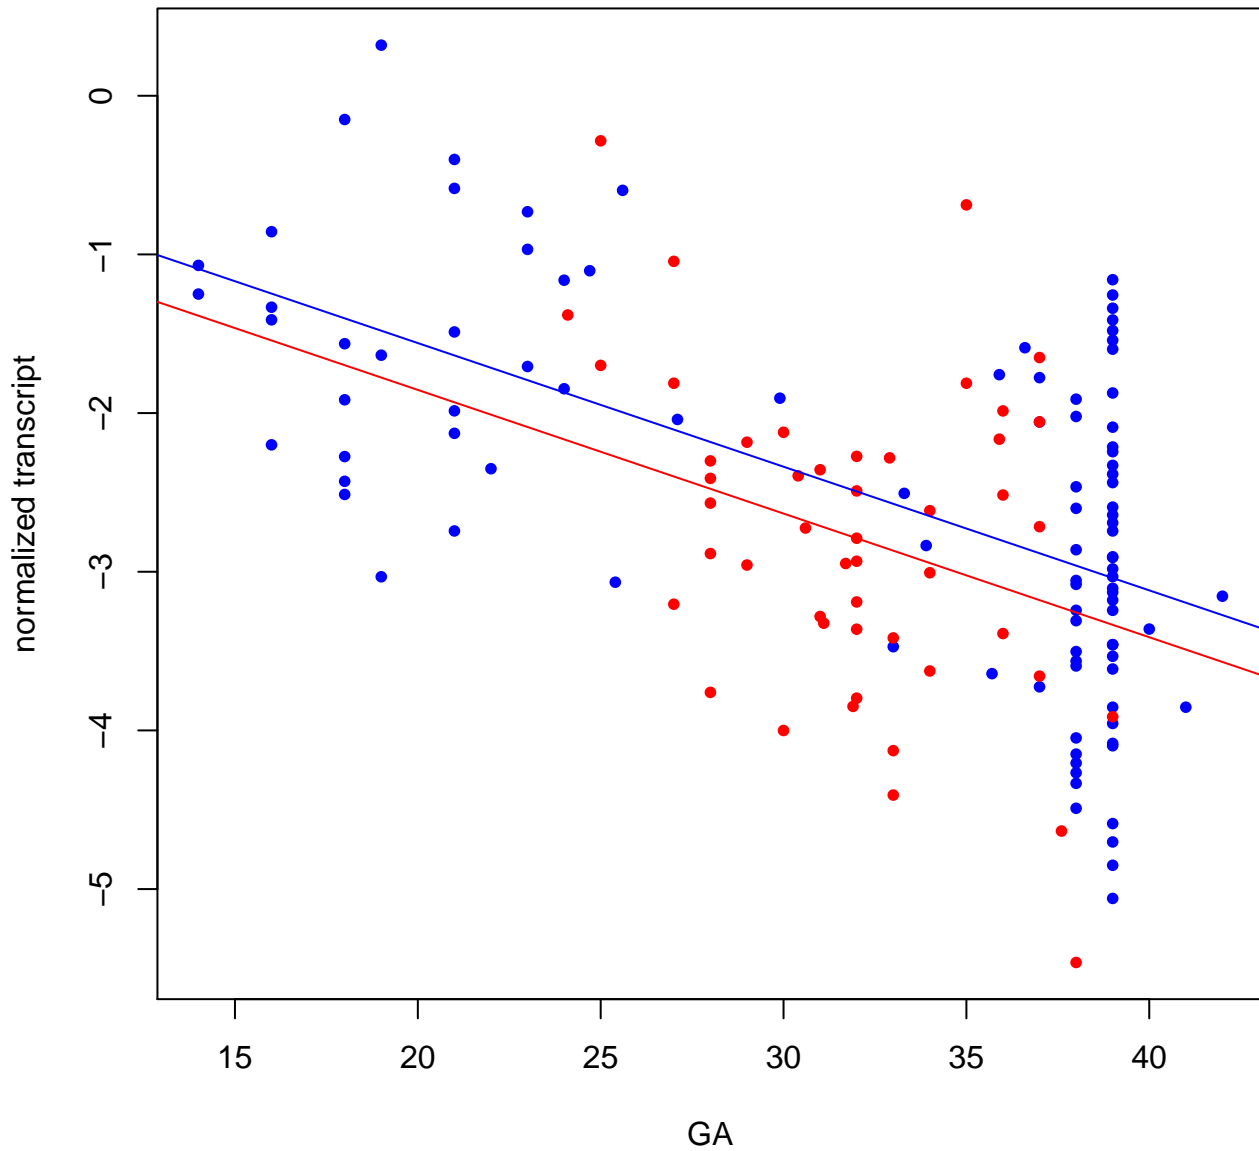

# 225731\_at

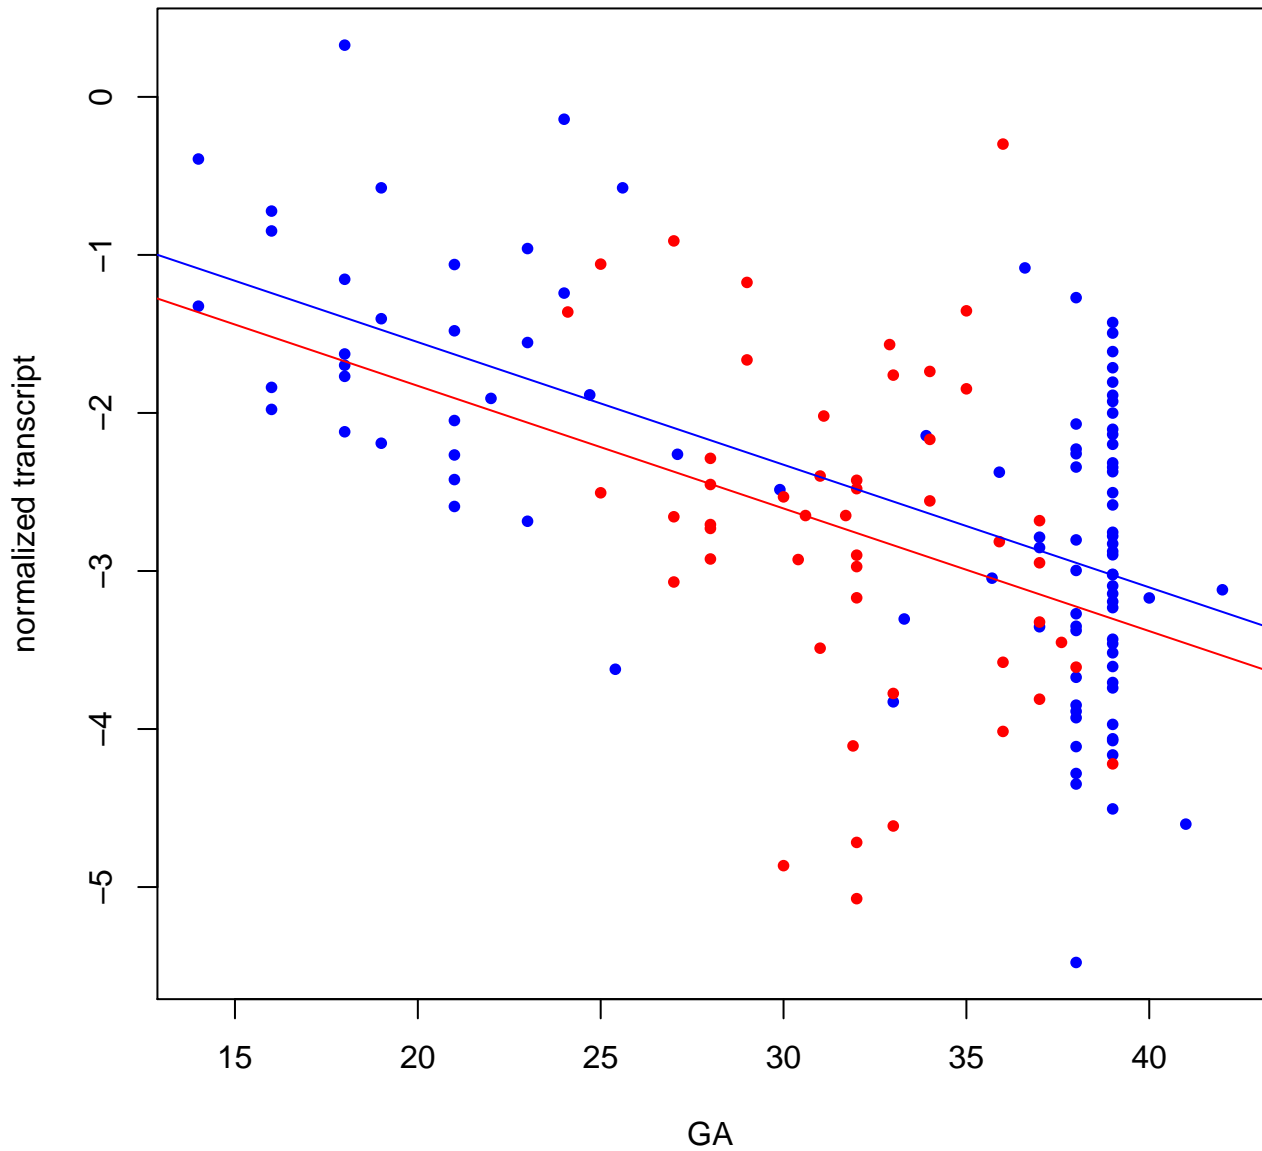

# 225735\_at

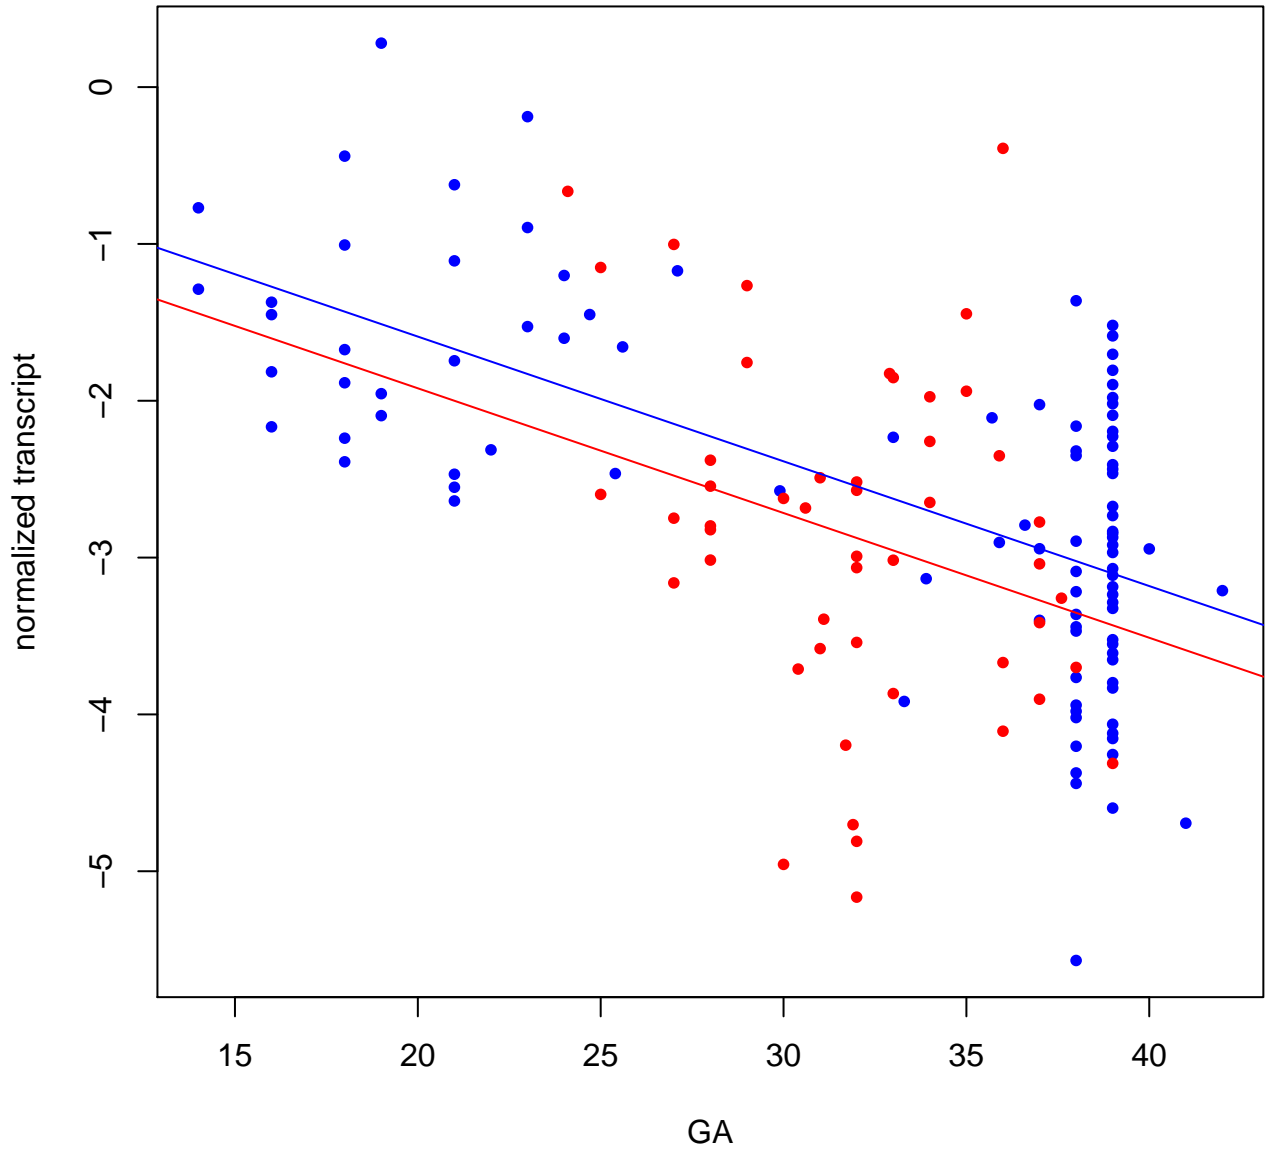



# 224996\_at

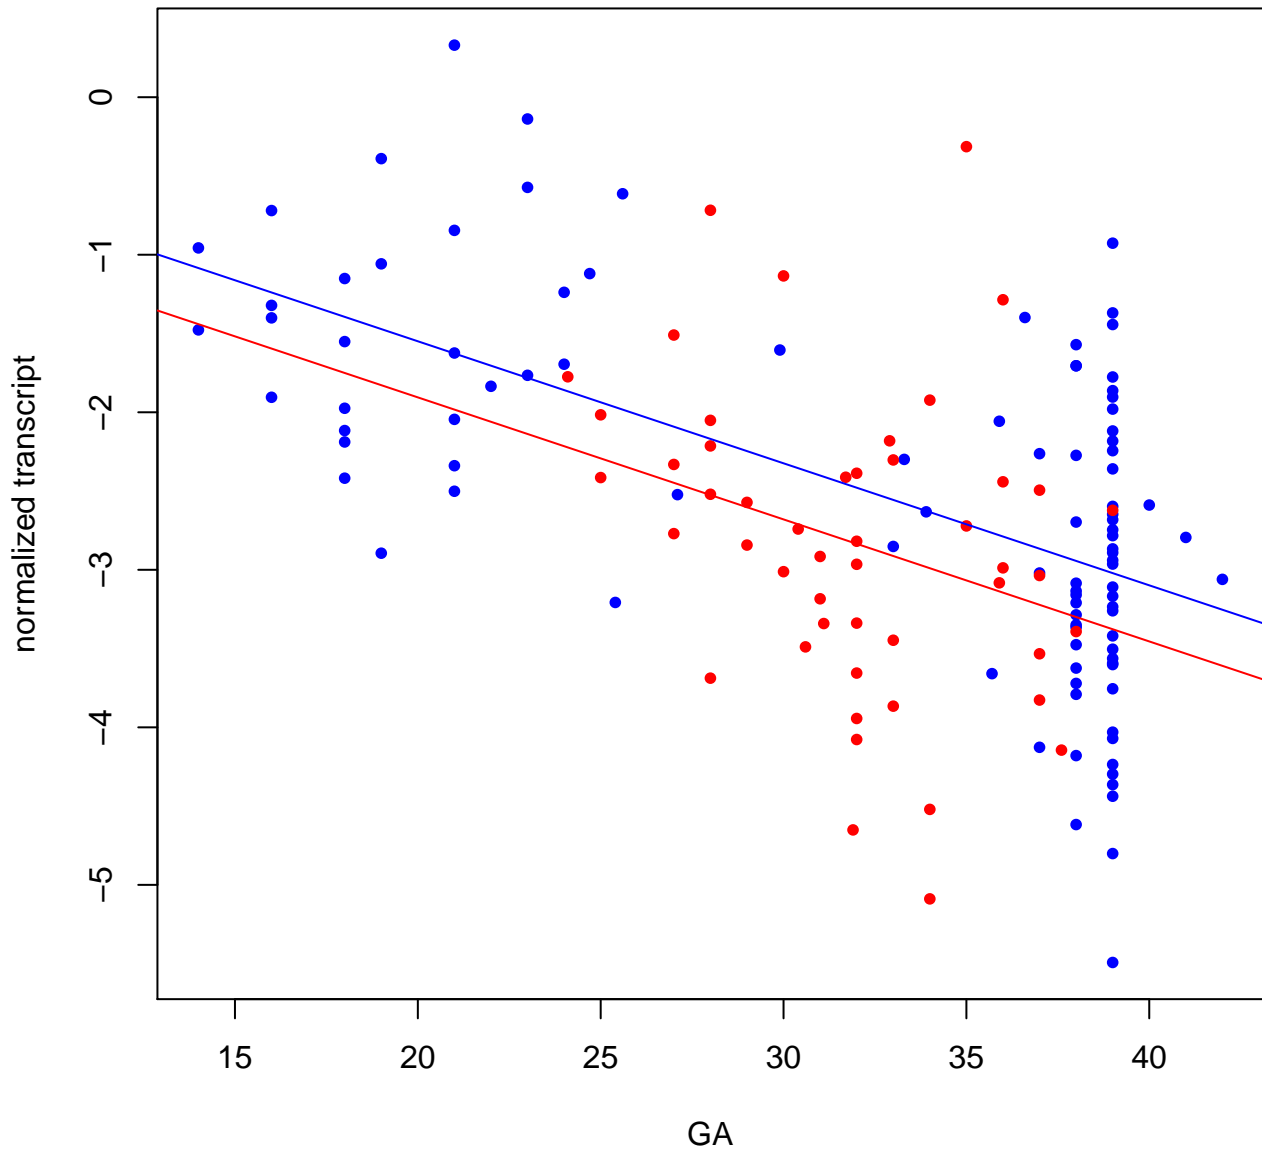

# 224996\_at.1

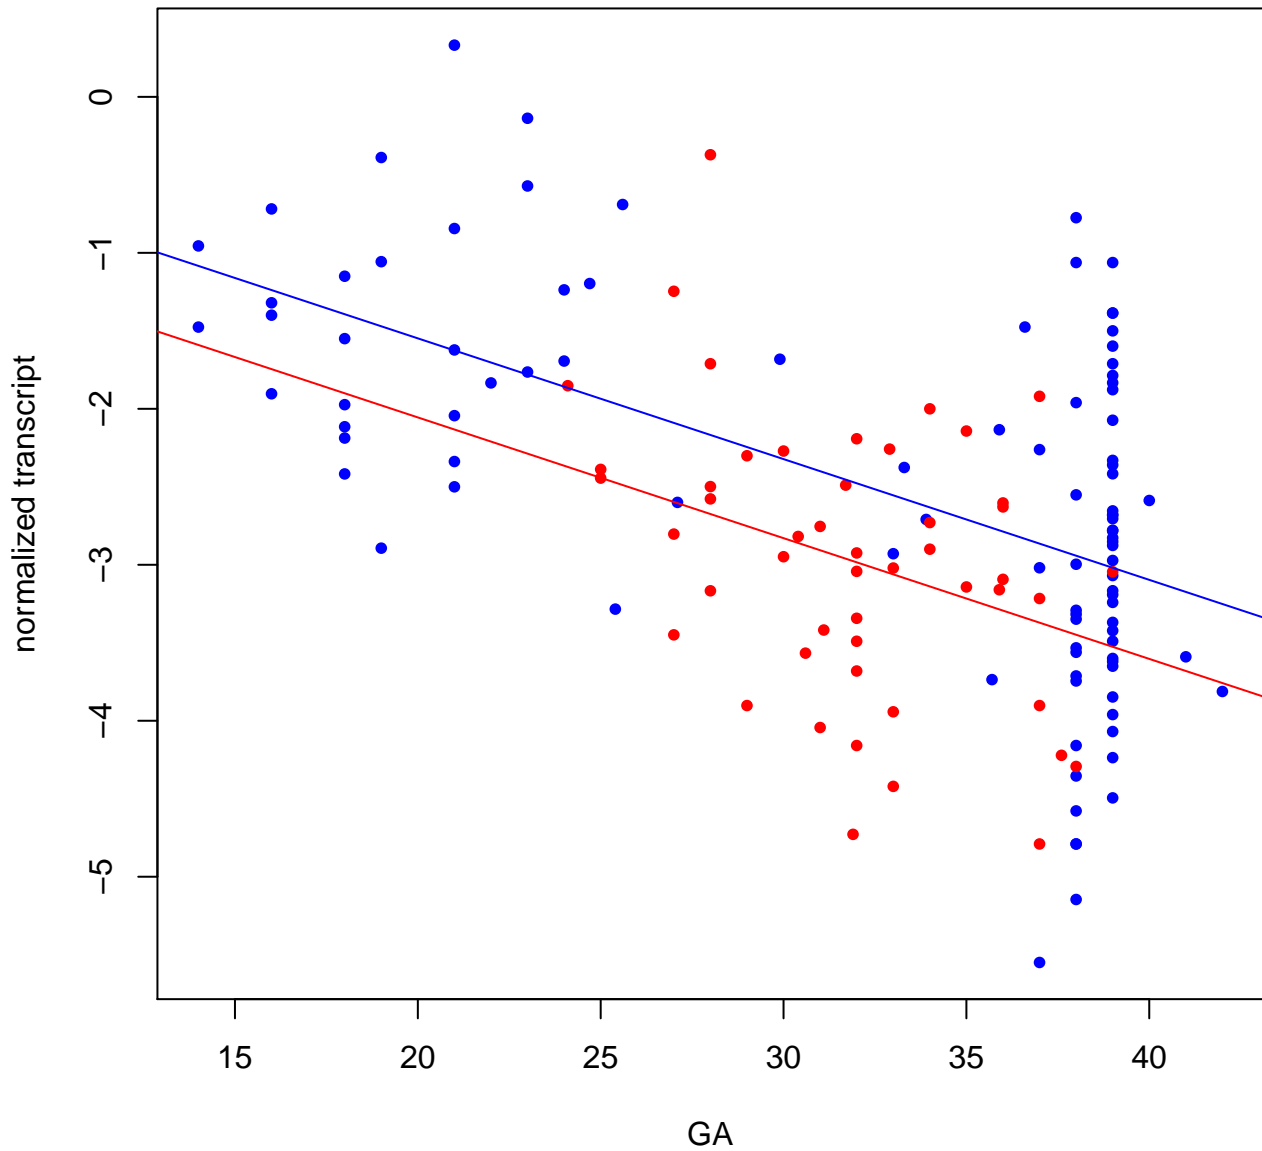

# 226651\_at

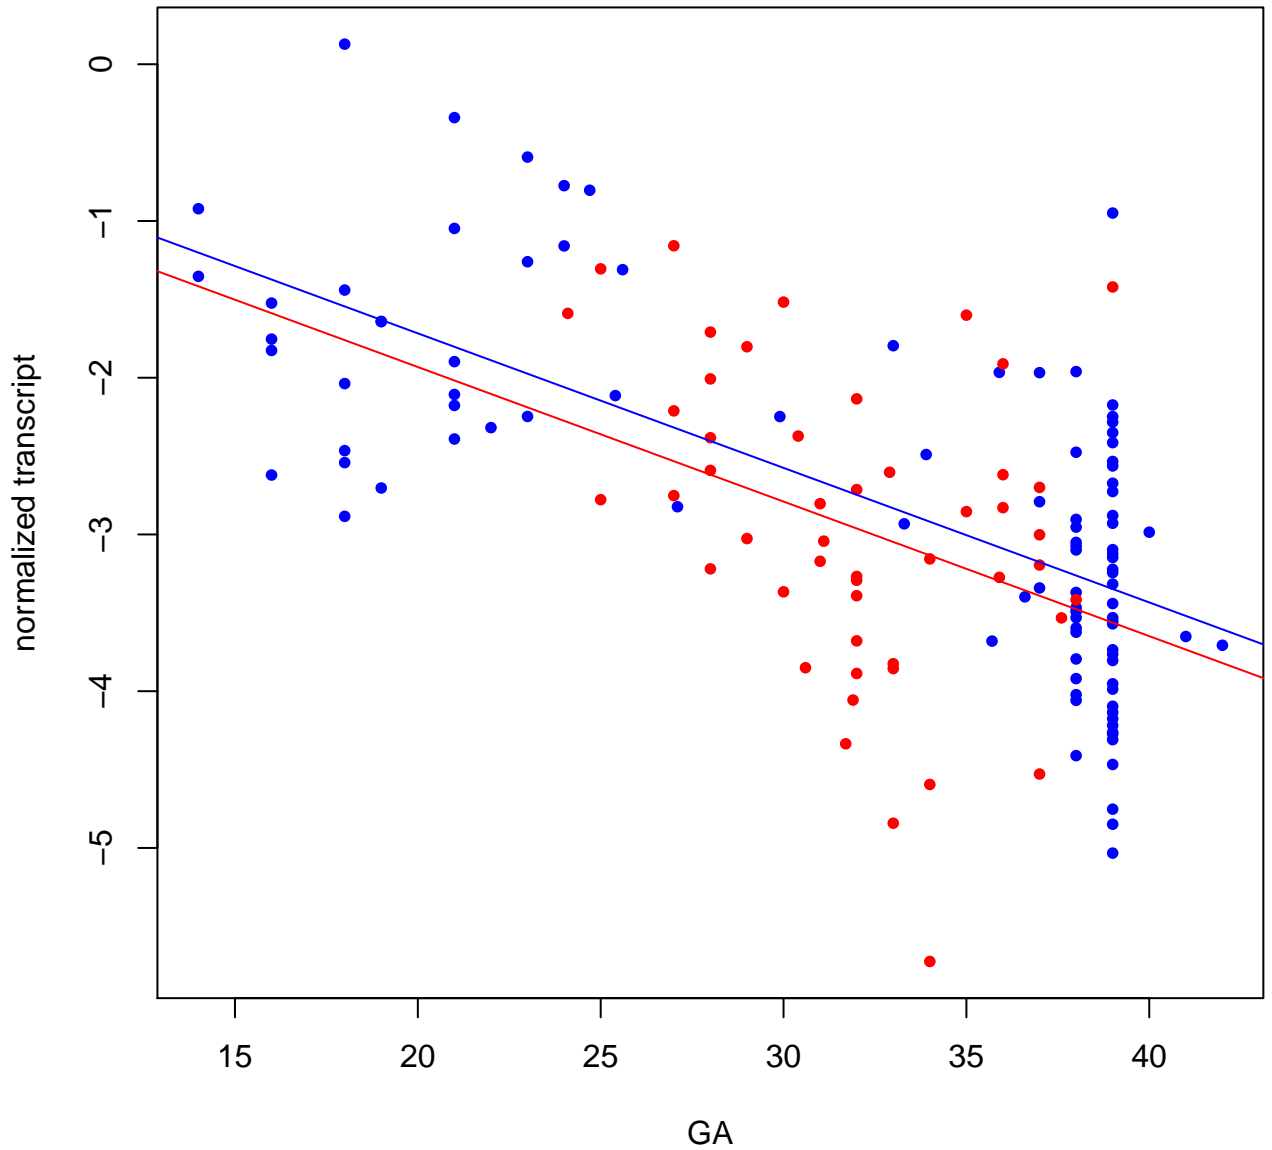

# 227250\_at.1

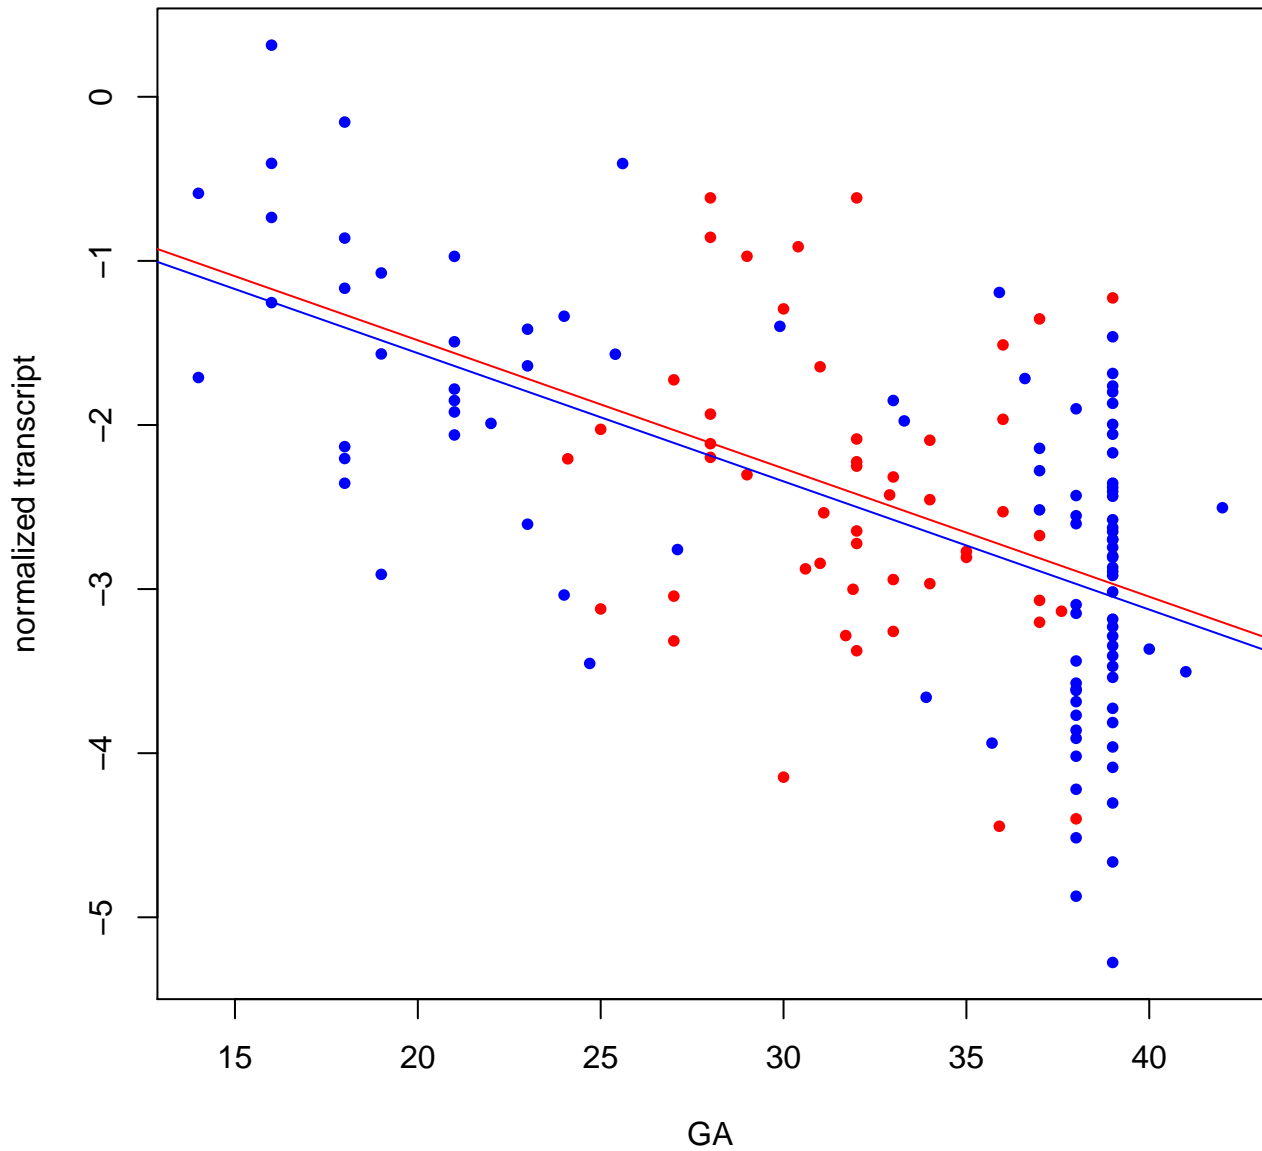

# 225285\_at

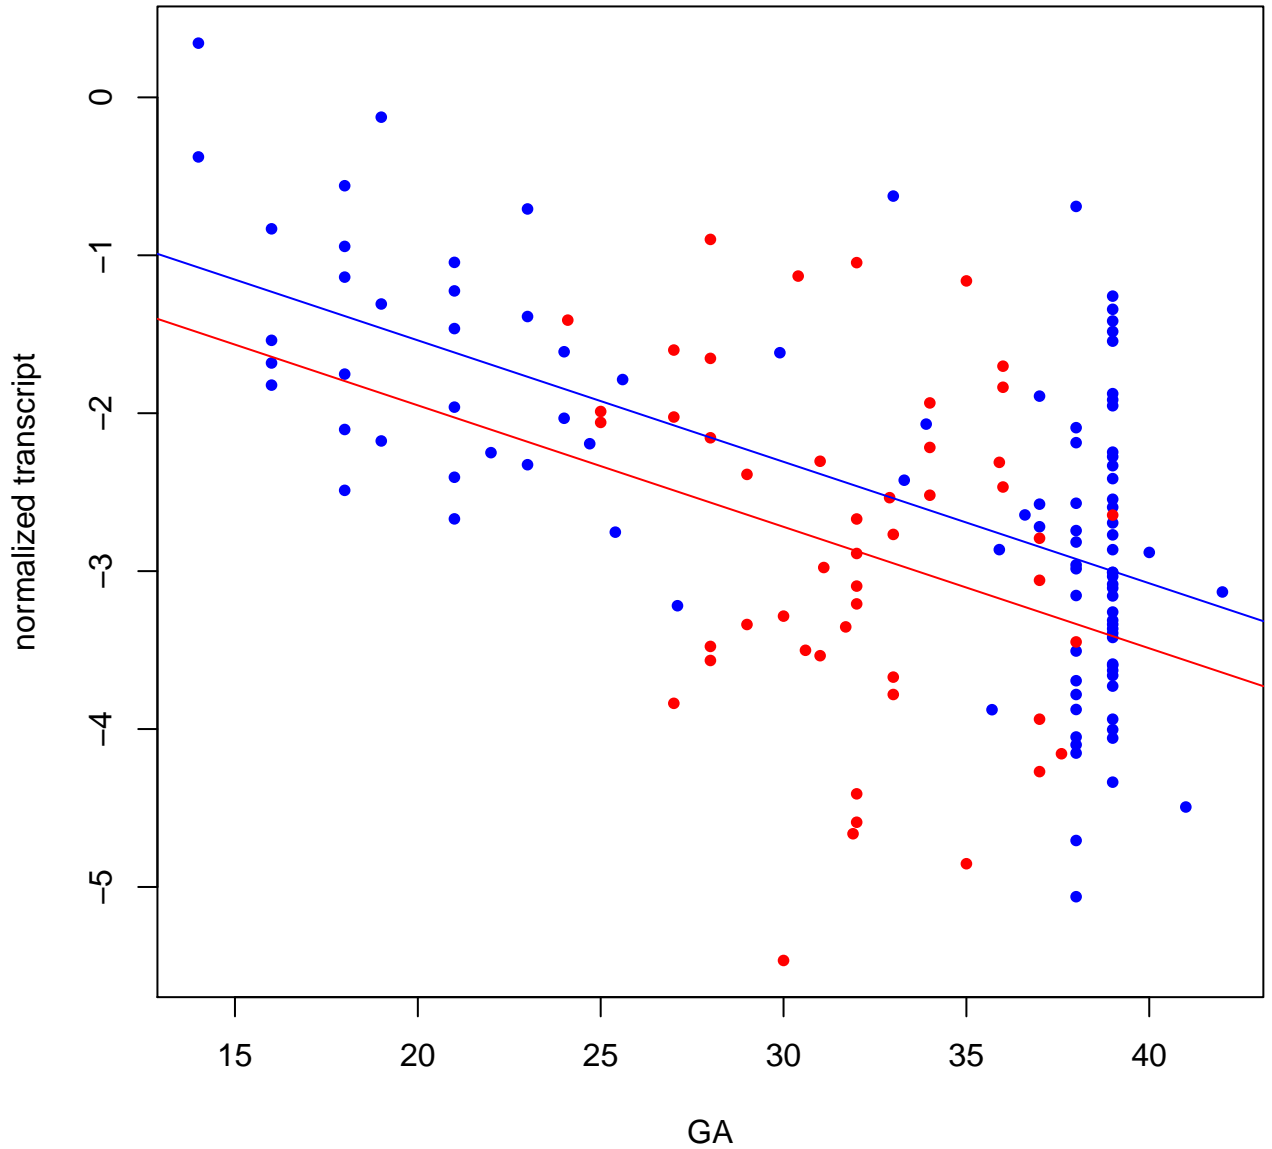

# 226517\_at

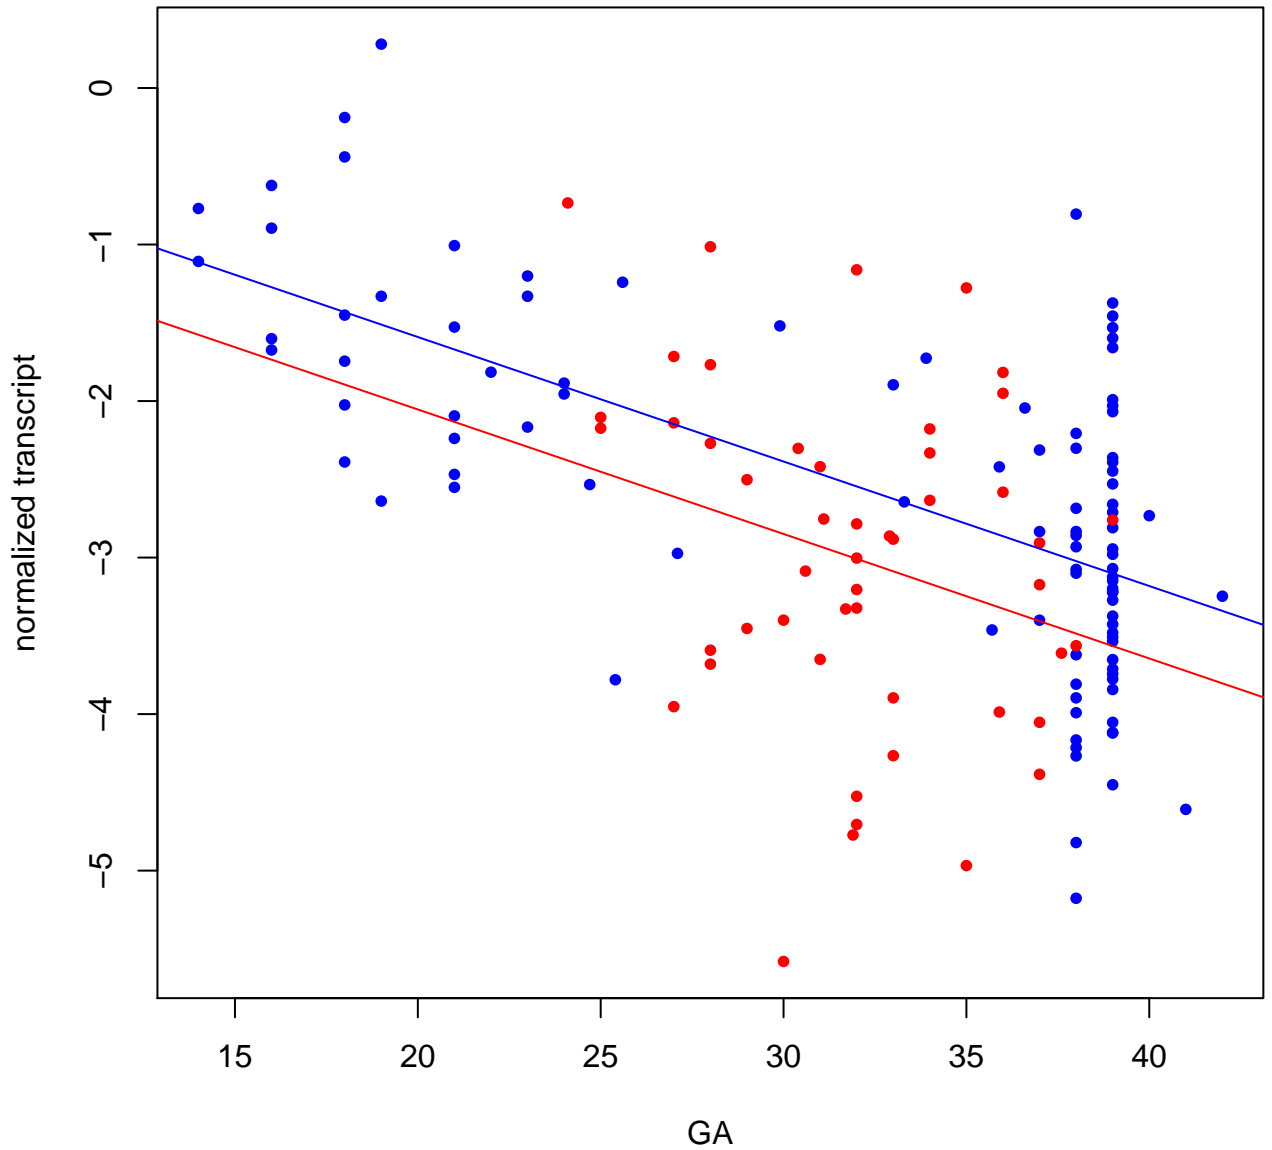

# 225914\_s\_at

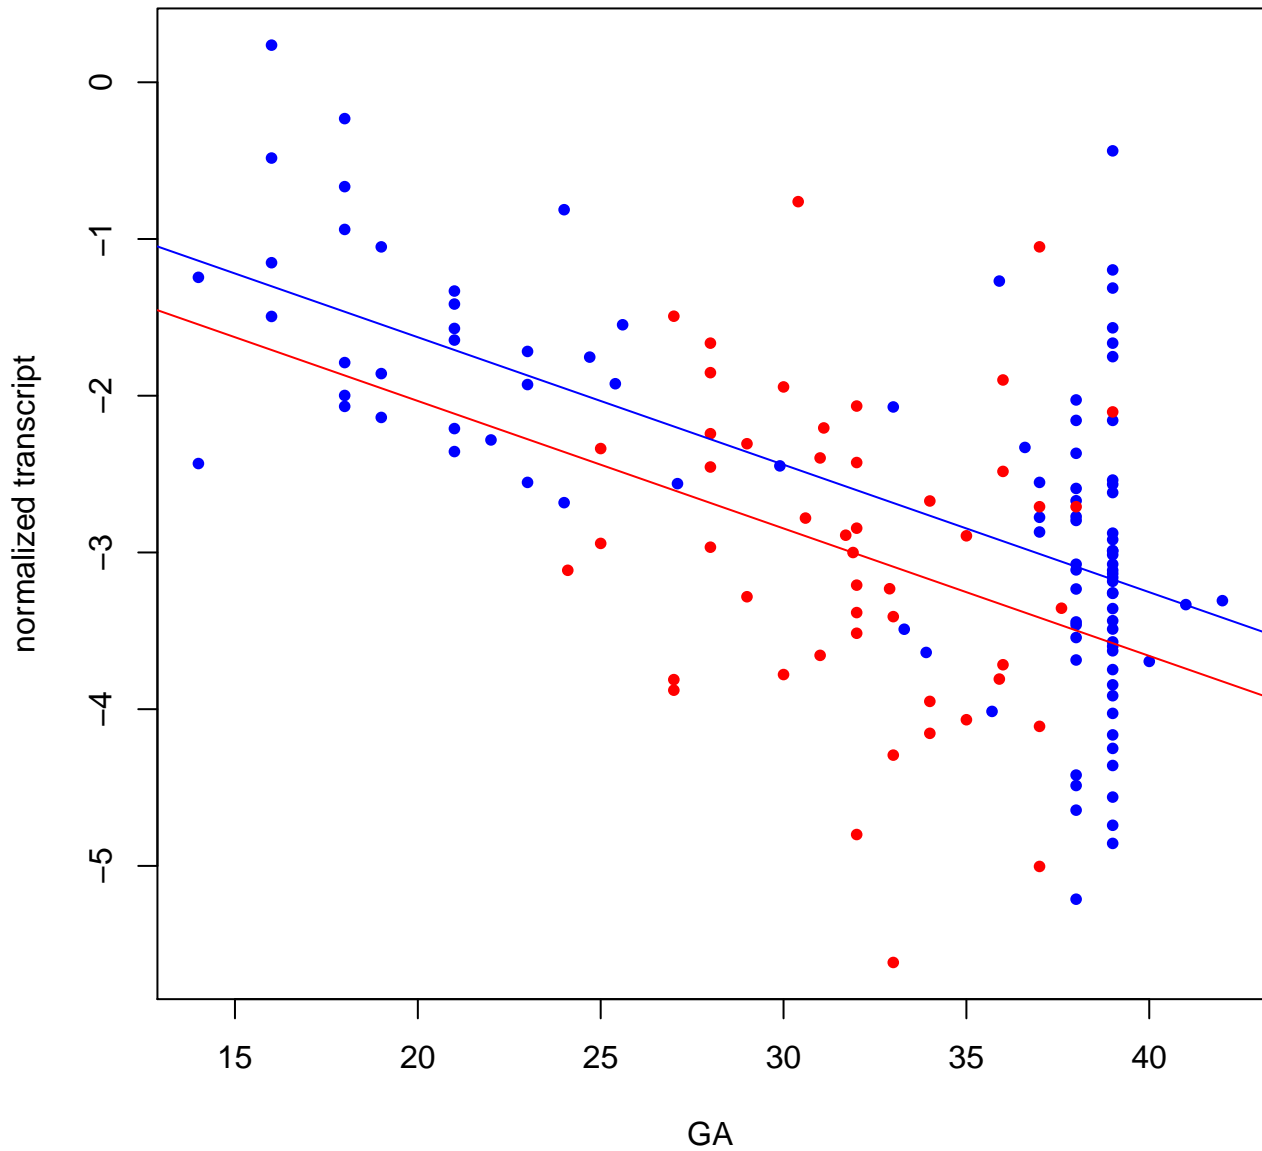

# 225914\_s\_at.1

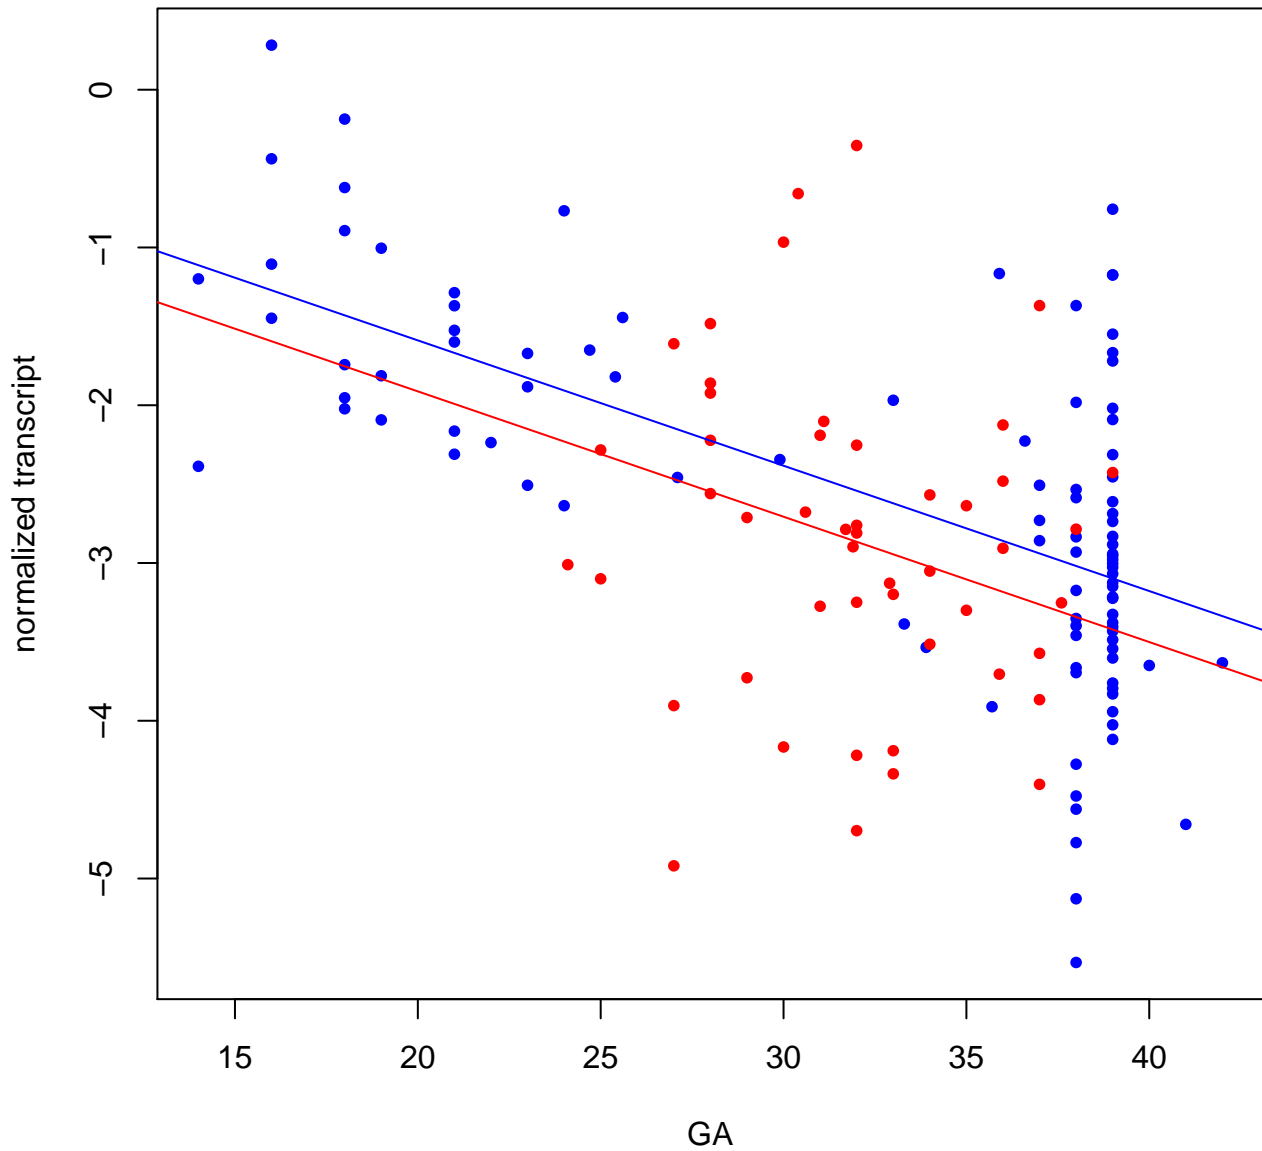



# 225825\_at

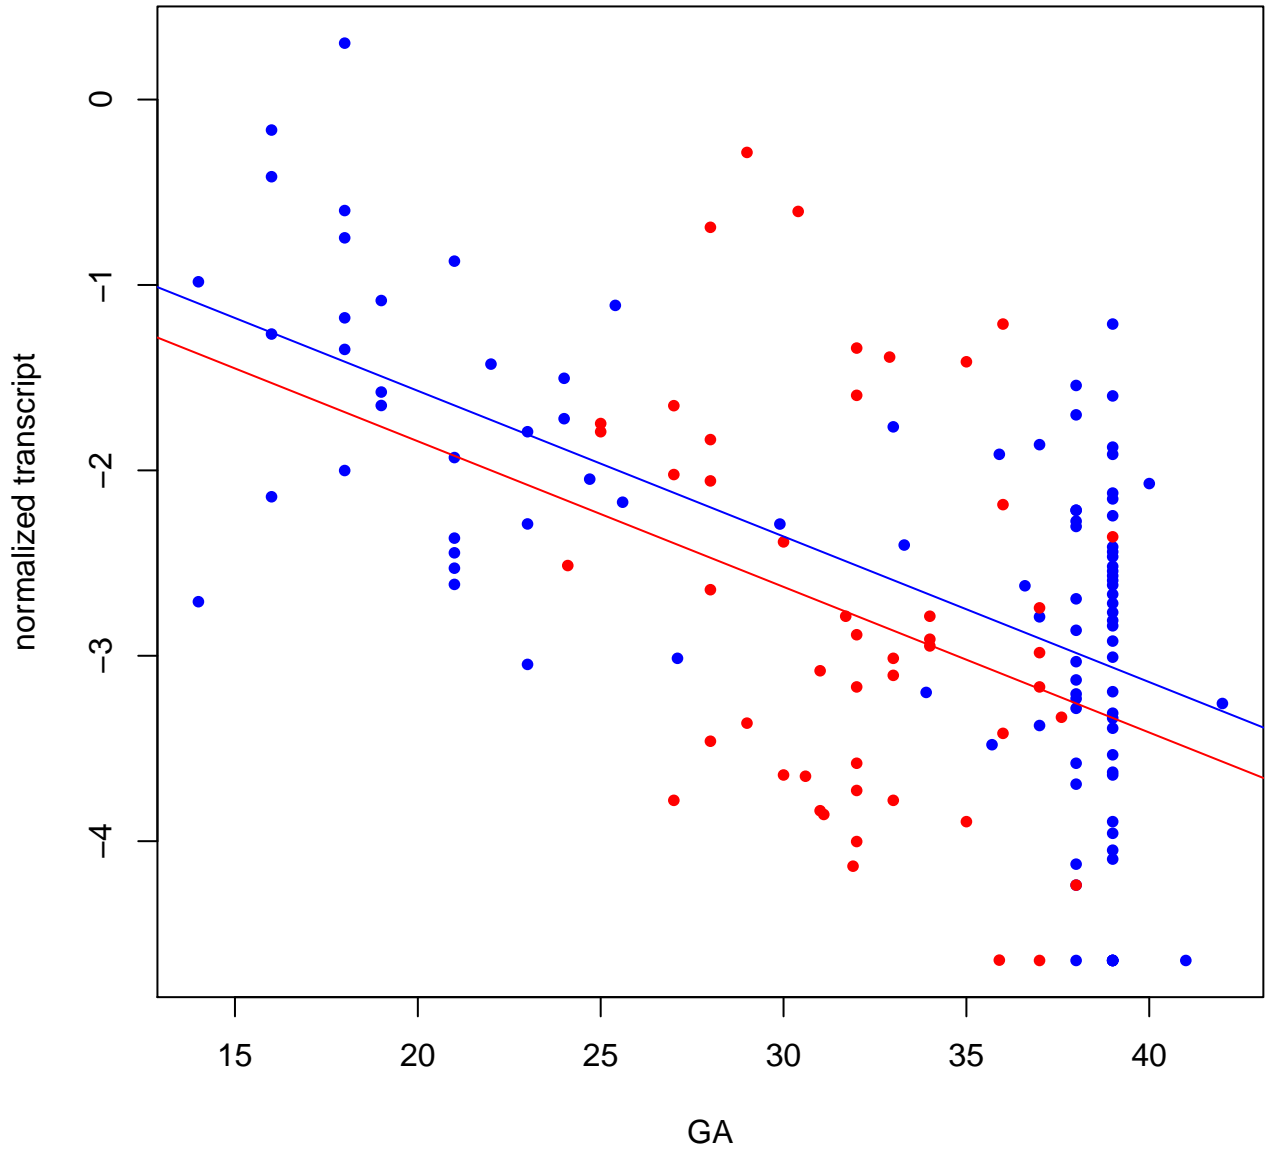

# 228141\_at

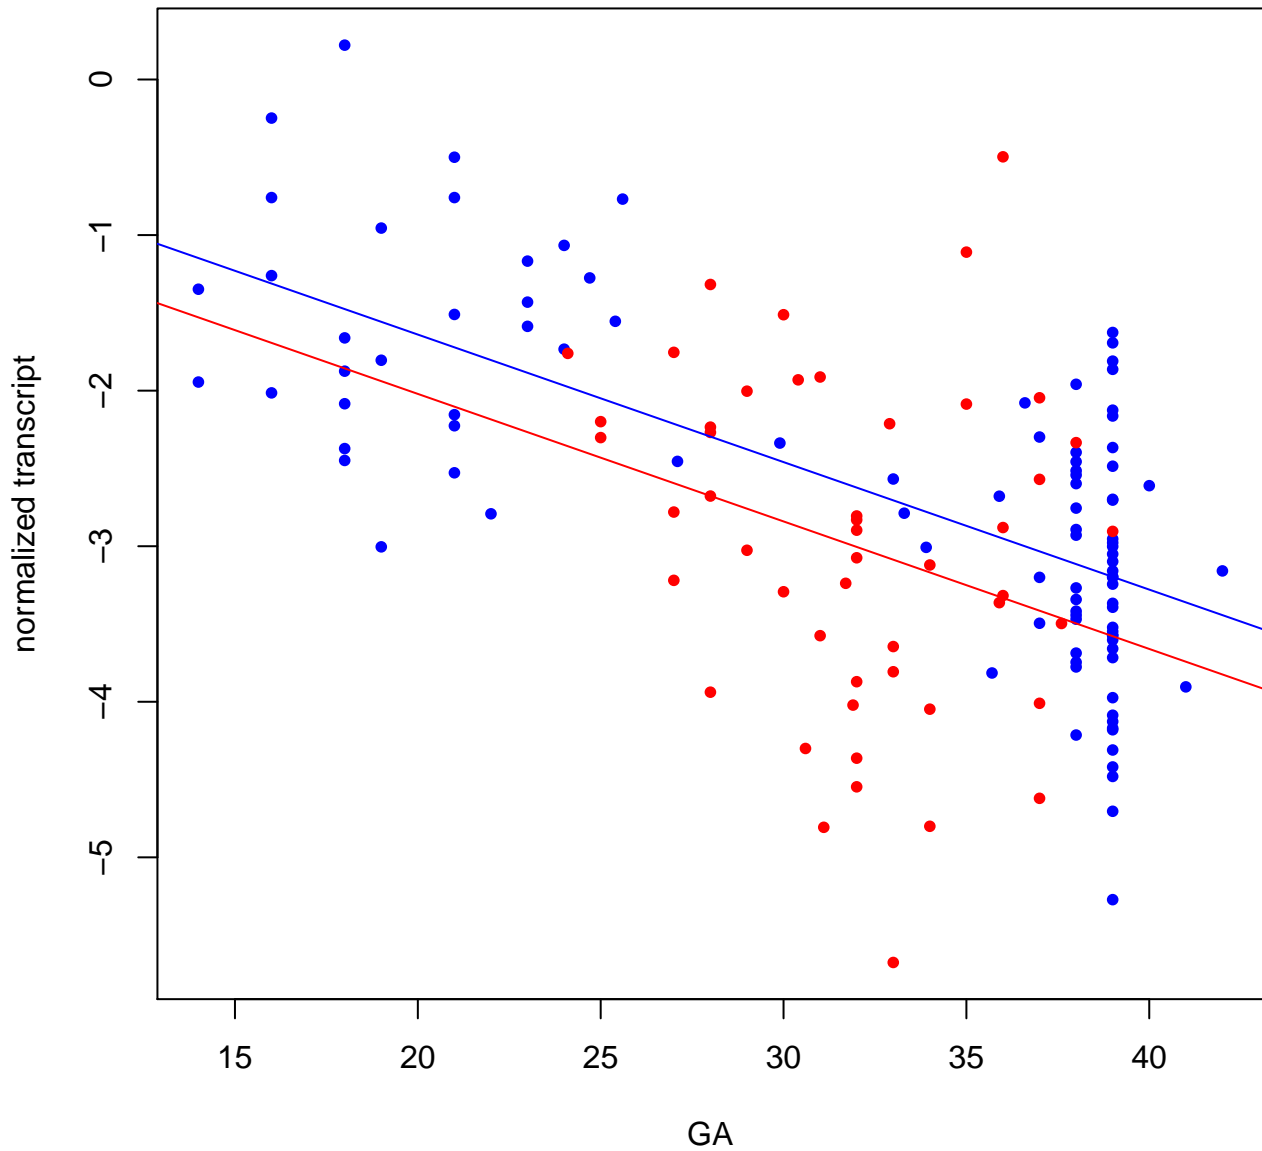

229357\_at

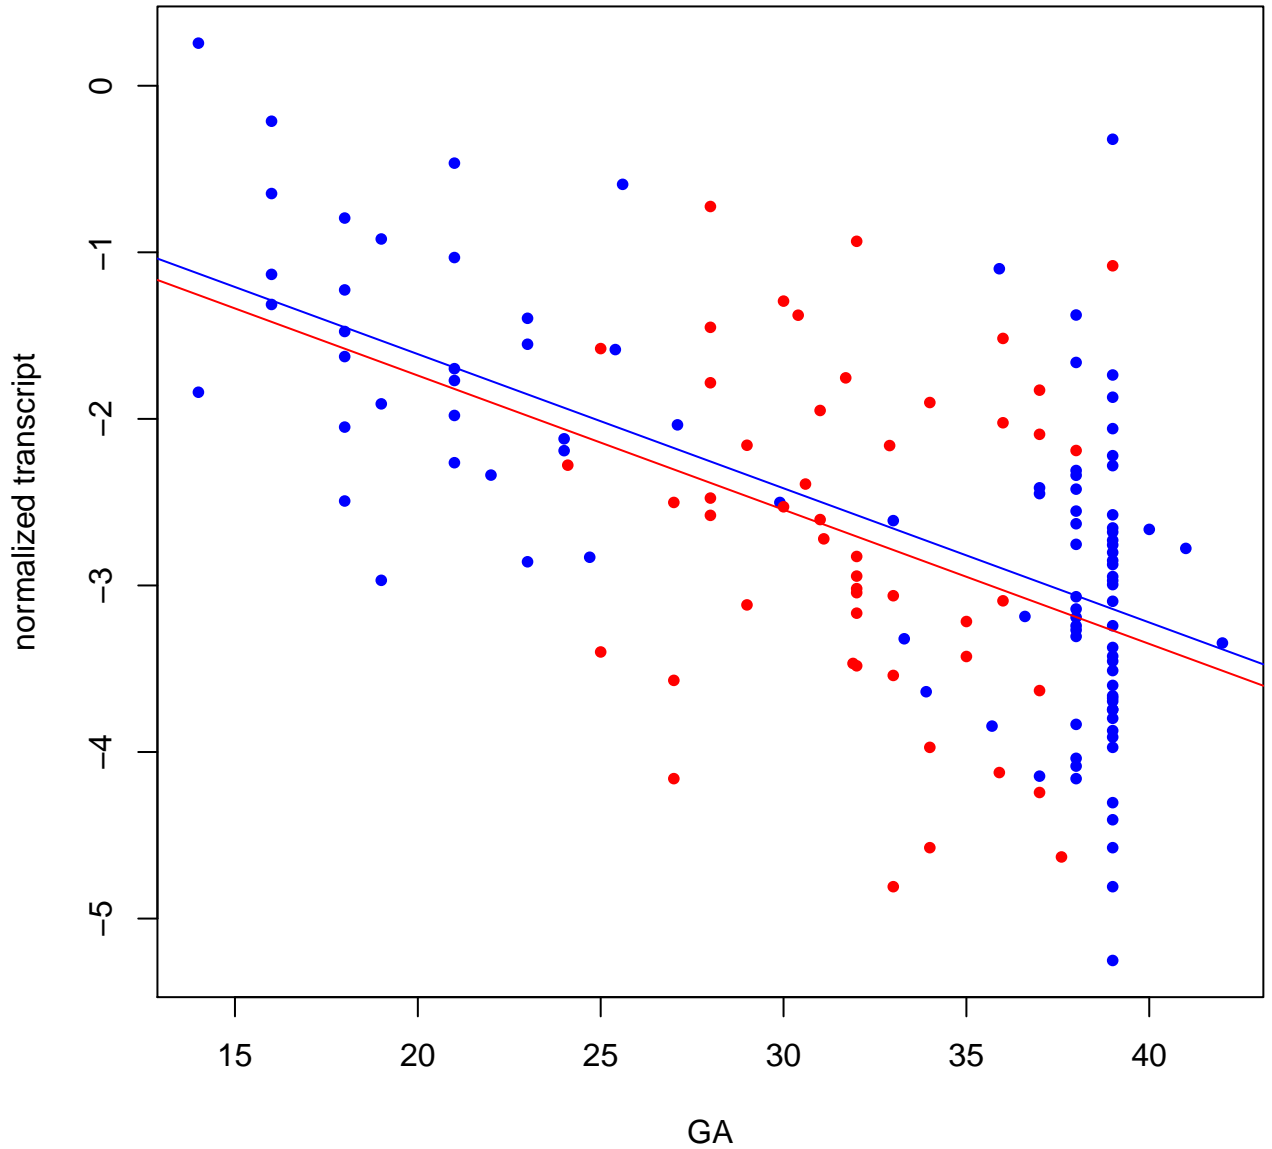

235368\_at

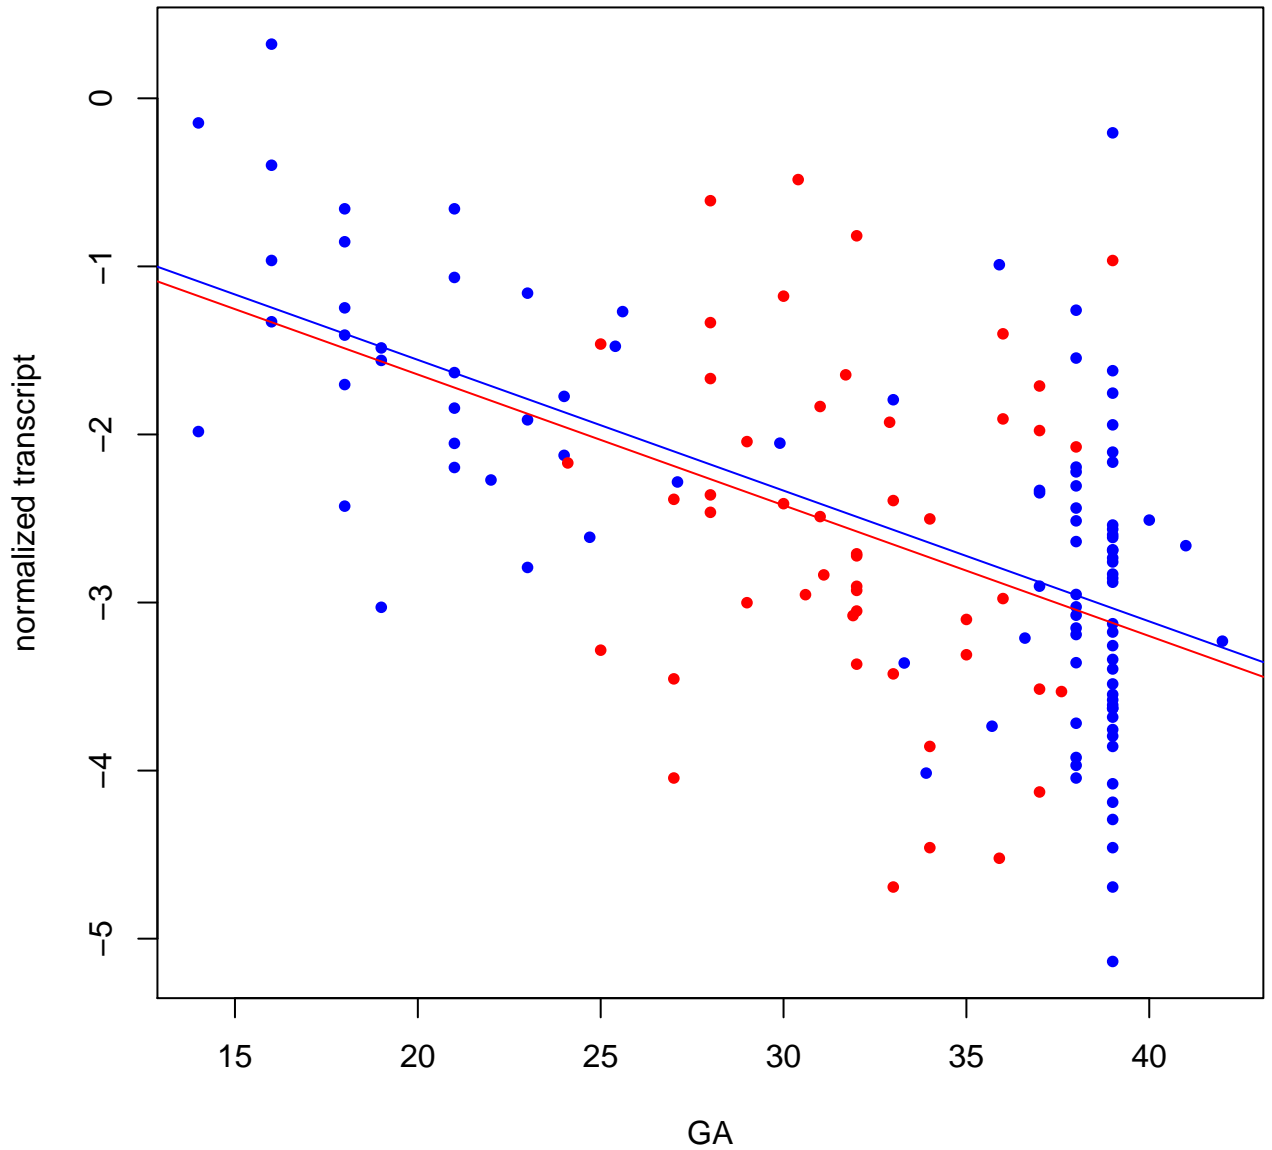

# 237261\_at

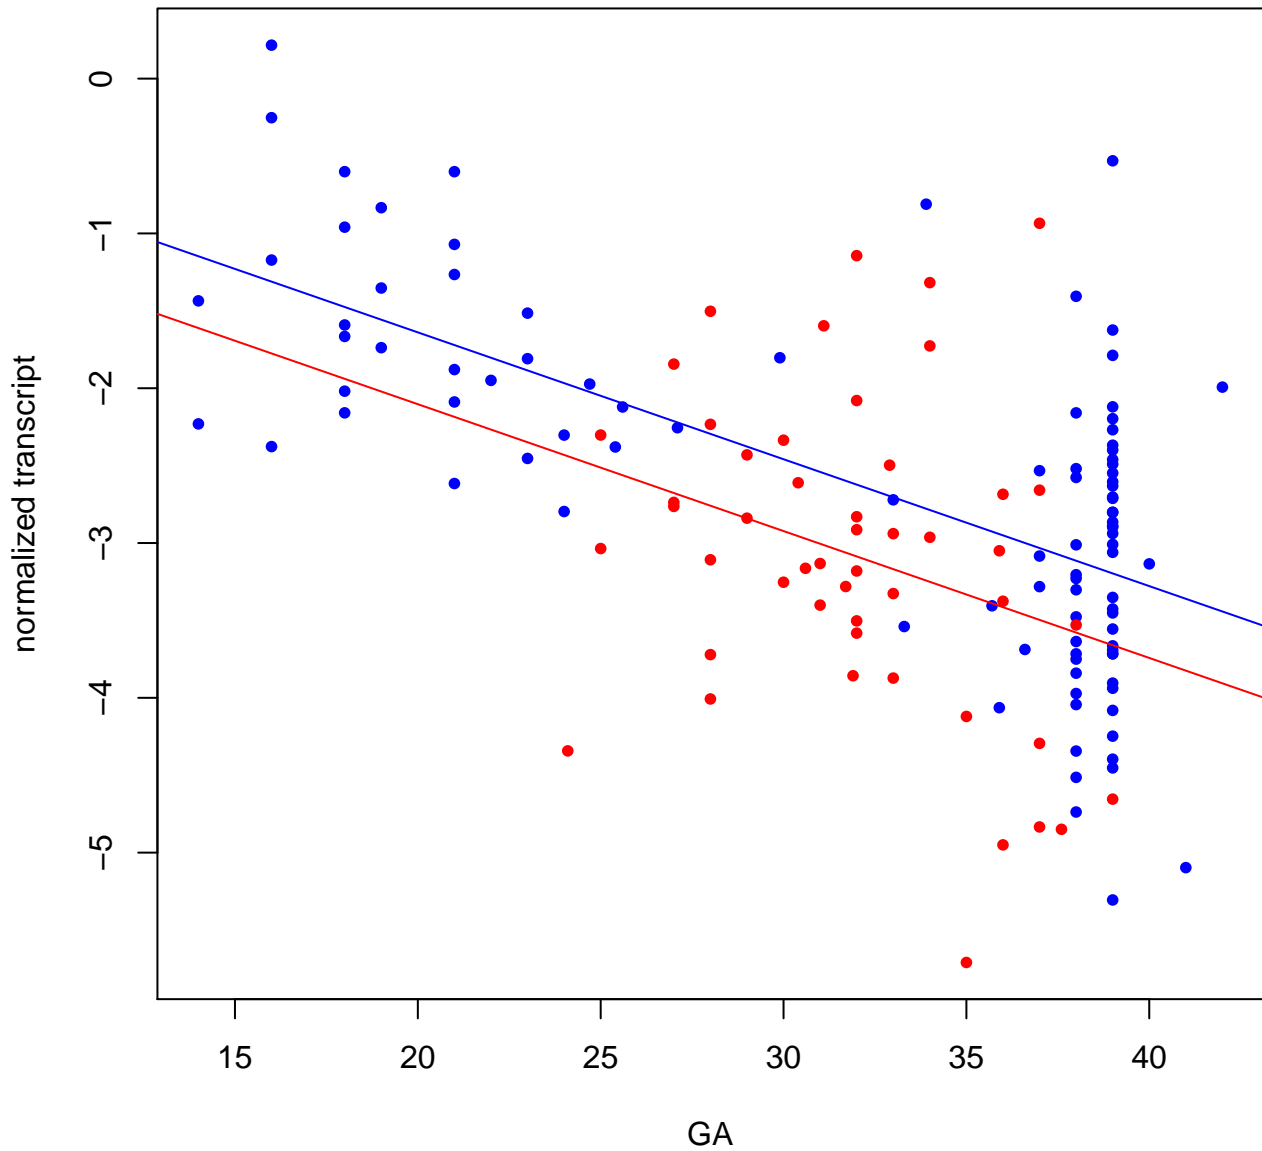

# 236034\_at

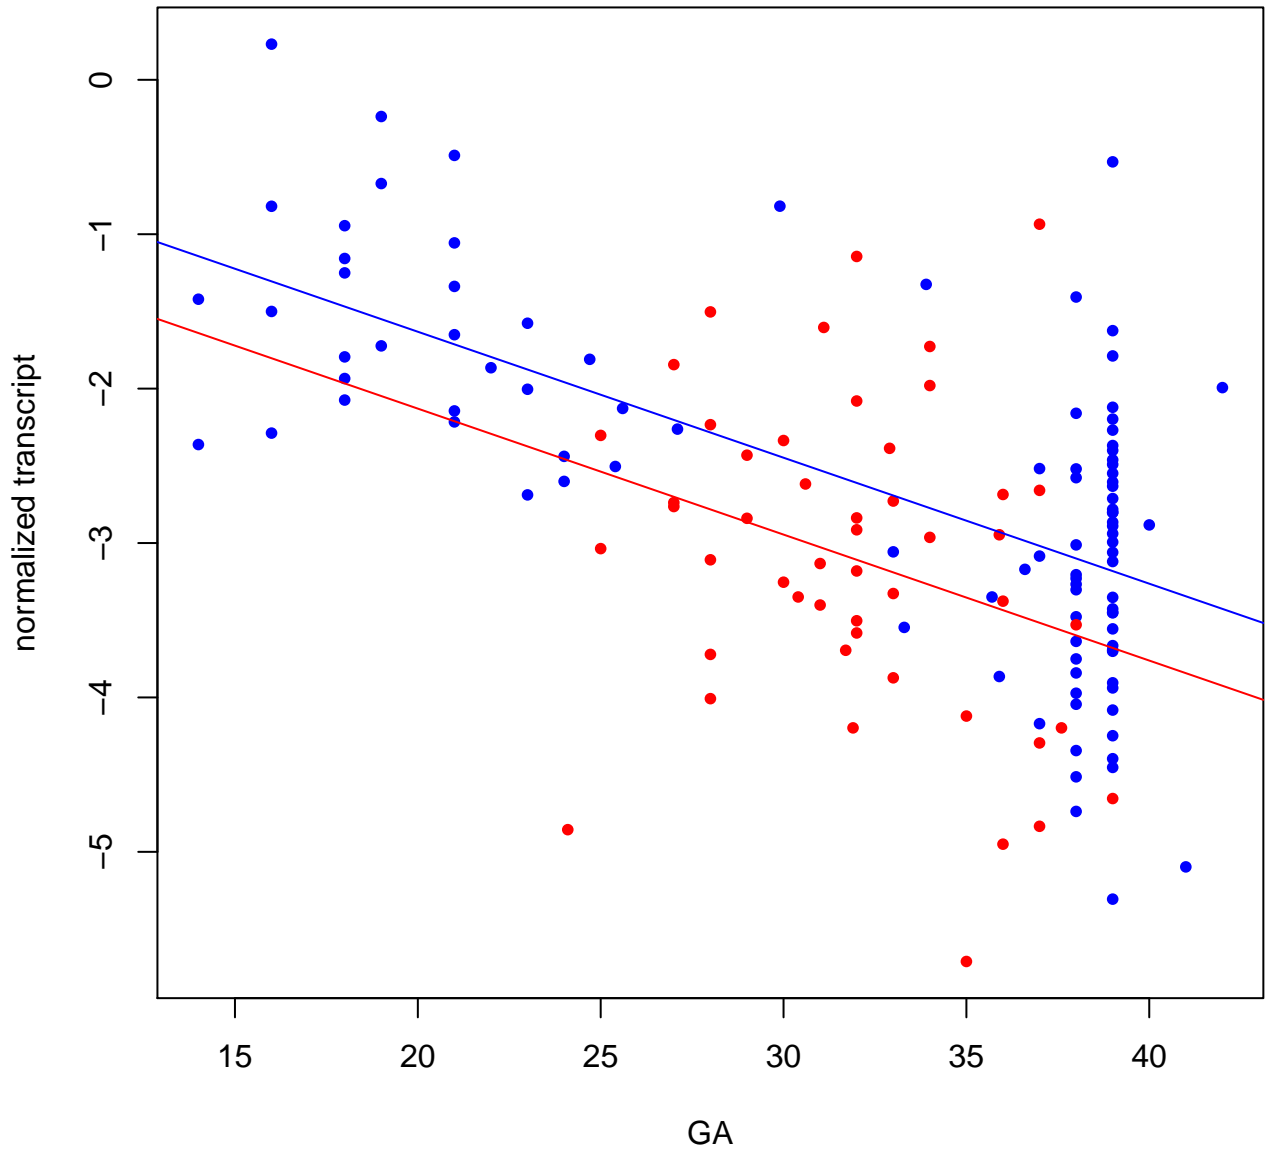

Supplement: pone.0069848.s002.pdf [file pone.0069848.s002.pdf]
